# Supplementary material for: Does women's political empowerment promote access to drinking water in developing countries? Effects and transmission channels
Source: Research Square preprint supplement (doi:10.21203/rs.3.rs-8279784/v1), 2026-01-27
Supplement: Supplementary file 1 [file 8c2f37d8171e19646aa9faa5.xlsx]

## Sheet: DONNEES THESE
Pays	country	id	regions	Pas d'utilisation des installations d'eau potable	eau potable améliorées	eau po non améliorée	eau potable limitée	Sanitation	SPAV	v2x_gencl	v2x_gencs	v2x_genpp	% des femmes au parlement	Rural	Urban	at least basic	Apd	adp	taux urbanisation	induin(% population)	v2_gender	pop	cc	pib	logpib	ide	ci	logci	ce	ce/10000	log(ce/10000)	agri	logagri	demo
Maroc	2000	1	2	3.02876	89.979	254583	4.92076	68.2173	-0.0655649	0.557	0.577	1	0.615385	26.6685	93.183	62.144	6.8593e+08	685.93	53.335	0.693791	0.532	1.40393	-0.233573	4.30175e+10	10.6336	-0.368034	53.4403	1.72787	4113.67	0.411367	-0.385771	68.6803	1.83683	0.237
Maroc	2001	1	2	2.84595	90.6967	489573	5.03759	68.9979	-0.163492	0.57	0.577	1	0.615385	28.7873	93.395	63.4571	8.029e+08	802.9	53.662	1.37144	0.571	1.36697	-0.236816	4.38315e+10	10.6418	-2.7275	53.4916	1.72829	4386.62	0.438662	-0.35787	68.0484	1.83282	0.24
Maroc	2002	1	2	2.66525	98.2958	730389	5.01578	70.1959	-0.261419	0.57	0.577	1	0.615385	30.9183	93.6071	64.764	5.7914e+08	579.14	53.99	2.37325	0.663	1.32214	-0.240059	4.70772e+10	10.6728	-0.452027	54.3101	1.73488	4439.72	0.443972	-0.352644	67.8535	1.83157	0.243
Maroc	2003	1	2	2.48678	98.3851	977957	4.98572	71.3611	-0.407007	0.57	0.576	1	10.7692	33.0613	93.8191	66.0631	7.6805e+08	768.05	54.317	3.35337	0.663	1.27031	-0.31997	5.80294e+10	10.7636	-2.30022	52.3319	1.71877	4398	0.4398	-0.356745	69.1822	1.83999	0.251
Maroc	2004	1	2	2.31046	98.4738	231808	4.94751	72.238	-0.312669	0.57	0.576	1	10.7692	35.2165	94.0313	67.3552	9.3105e+08	931.05	54.644	11.6079	0.663	1.28219	-0.243783	6.61141e+10	10.8203	-0.862403	55.5516	1.7447	4946.64	0.494664	-0.30569	67.3112	1.82809	0.251
Maroc	2005	1	2	2.12706	98.5618	403564	4.88866	73.1773	-0.556681	0.57	0.576	1	10.7692	37.3837	94.2434	68.7555	8.839e+08	883.9	55.174	15.0844	0.675	1.34347	-0.425059	6.88527e+10	10.8379	-1.59649	61.4938	1.78883	5301.47	0.530147	-0.275603	67.1947	1.82734	0.258
Maroc	2006	1	2	1.94539	98.6493	567625	4.81937	74.1286	-0.461343	0.563	0.558	1	10.7692	39.563	94.4557	70.1635	1.26579e+09	1265.79	55.746	19.7712	0.674	1.35137	-0.476106	7.58838e+10	10.8801	-2.00992	64.6722	1.81072	5340.53	0.534053	-0.272416	67.0984	1.82671	0.257
Maroc	2007	1	2	1.76754	98.7361	743086	4.74263	75.0787	-0.501324	0.563	0.588	1	10.4615	41.7544	94.668	71.5537	1.28091e+09	1280.91	56.317	21.5	0.671	1.34058	-0.386844	8.69479e+10	10.9393	-2.19382	71.3496	1.85339	5226.21	0.522621	-0.281813	67.1297	1.82691	0.258
Maroc	2008	1	2	1.59354	98.8225	930344	4.65878	76.027	-0.571273	0.563	0.551	1	10.4615	43.9579	94.8803	72.9256	1.43844e+09	1438.44	56.886	33.1	0.673	1.3387	-0.433666	1.01823e+11	11.0078	-2.15036	77.8345	1.89117	5694.04	0.569404	-0.24458	67.1768	1.82722	0.252
Maroc	2009	1	2	1.4234	98.9083	129715	4.56818	76.9734	-0.3983	0.563	0.556	1	10.4615	46.1735	95.0927	74.2785	1.03727e+09	1037.27	57.452	41.3	0.67	1.3326	-0.367966	1.01155e+11	11.005	-1.4913	62.371	1.79498	5486.08	0.548608	-0.260738	67.2252	1.82753	0.255
Maroc	2010	1	2	1.257	98.9935	339966	4.47091	77.9186	-0.383013	0.592	0.56	1	10.4615	48.4011	95.3051	75.6139	9.9924e+08	999.24	58.018	52	0.67	1.35274	-0.231424	1.00865e+11	11.0037	-0.660648	69.542	1.84225	6005.15	0.600515	-0.221476	67.1931	1.82732	0.258
Maroc	2011	1	2	1.09442	99.0782	562223	4.36745	78.8617	-0.392257	0.602	0.578	1	16.962	50.6409	95.5176	76.9301	1.42513e+09	1425.13	58.581	46.1075	0.719	1.36305	-0.452251	1.10081e+11	11.0417	-2.27334	76.8259	1.88551	6222.63	0.622263	-0.206026	67.4519	1.82899	0.263
Maroc	2012	1	2	0.935608	99.1623	796041	4.25803	79.8029	-0.470459	0.607	0.584	1	16.962	52.8927	95.7301	78.2276	1.52069e+09	1520.69	59.142	55.4161	0.72	1.33597	-0.49313	1.06937e+11	11.0291	-2.48239	78.2221	1.89333	6249.12	0.624912	-0.204181	68.1223	1.83329	0.265
Maroc	2013	1	2	0.780565	99.2459	41708	4.14296	80.7418	-0.493018	0.611	0.594	1	16.962	55.1566	95.9426	79.5059	2.03704e+09	2037.04	59.7	56	0.687	1.28781	-0.423098	1.15739e+11	11.0635	-2.91621	73.8578	1.8684	6330.08	0.633008	-0.198591	68.5301	1.83588	0.267
Maroc	2014	1	2	0.629244	99.3021	298794	4.02248	81.6788	-0.446266	0.613	0.588	1	16.962	57.4326	96.1553	80.7653	2.24027e+09	2240.27	60.256	56.7746	0.69	1.22724	-0.305043	1.19131e+11	11.076	-3.09416	71.8936	1.85669	6336.76	0.633676	-0.198133	67.4042	1.82869	0.268
Maroc	2015	1	2	0.486709	99.3527	5625105	3.89691	82.6134	-0.344395	0.606	0.581	1	16.962	59.7207	96.3679	82.0055	1.75829e+09	1758.29	60.809	57.08	0.706	1.17076	-0.286488	1.10414e+11	11.043	-2.59632	67.2887	1.82794	6368.39	0.636839	-0.19597	67.3247	1.82817	0.263
Maroc	2016	1	2	0.348514	99.4024	836848	3.76647	83.5459	-0.317618	0.608	0.597	1	20.5063	62.0209	96.5806	83.2268	2.37588e+09	2375.88	61.36	58.2712	0.724	1.19451	-0.190376	1.11573e+11	11.0476	-1.57425	71.1227	1.85201	6361.2	0.63612	-0.196461	69.1799	1.83998	0.266
Maroc	2017	1	2	0.214082	99.4086	122635	3.63147	84.4759	-0.378089	0.578	0.552	1	20.5063	64.3332	96.7934	84.4287	2.72354e+09	2723.54	61.908	61.7622	0.722	1.20034	-0.199215	1.18541e+11	11.0739	-1.66795	74.1734	1.87025	6580.72	0.658072	-0.181726	69.5643	1.84239	0.261
Maroc	2018	1	2	0.0833818	99.4148	419782	2.46346	85.4035	-0.348493	0.586	0.552	1	20.5063	66.6576	97.0062	85.6112	8.7244e+08	872.44	62.453	64.8039	0.722	1.10364	-0.289578	1.27341e+11	11.105	-2.76352	77.2549	1.88793	6730.61	0.673061	-0.171946	68.3975	1.83504	0.262
Maroc	2019	1	2	0.148732	98.0508	684886	2.33326	86.3282	-0.345805	0.555	0.552	1	20.5063	68.994	97.2191	86.7741	8.3058e+08	830.58	62.994	84.1204	0.721	1.03022	-0.335644	1.2892e+11	11.1103	-0.827687	75.9981	1.8808	7267.46	0.726746	-0.138617	66.3498	1.82184	0.259
Maroc	2020	1	2	0.116057	98.0522	881441	2.1998	87.2504	-0.359523	0.56	0.531	1	20.5063	71.3425	97.432	87.9177	1.94197e+09	1941.97	63.532	84.1204	0.759	1.02565	-0.412526	1.21354e+11	11.0841	-0.959416	68.8438	1.83786	6610.58	0.661058	-0.179761	68.0215	1.83265	0.255
Maroc	2021	1	2	0.132394	98.0535	93266	2.06342	87.3836	-0.402563	0.589	0.553	1	22.7848	73.7032	97.6449	89.0415	9.6619e+08	966.19	64.065	88.1303	0.743	1.00692	-0.420963	1.41818e+11	11.1517	-1.62139	75.6322	1.87871	7256.72	0.725672	-0.13926	67.8714	1.83169	0.263
Maroc	2022	1	2	0.124225	98.0548	947612	2.03293	87.5164	-0.362119	0.601	0.549	1	24.0506	76.0759	97.8579	90.1462	1.50713e+09	1507.13	64.596	89.9	0.754	1.00864	-0.357443	1.30913e+11	11.117	-1.56528	101.116	2.00482	7129.51	0.712951	-0.146941	67.9464	1.83217	0.263
Mali	2000	2	1	4.74064	94.4629	973465	4.4127	17.3336	0.24011	0.886	0.787	1	12.2449	37.5661	79.3257	49.4074	4.7862e+08	478.62	28.356	0.142546	0.735	2.90783	-0.87851	2.96148e+09	9.47151	-0.078622	55.4226	1.74369	391.754	0.0391754	-1.40699	31.6877	1.50089	0.511
Mali	2001	2	1	4.53125	94.8381	53776	4.53712	18.5366	0.32547	0.886	0.787	1	12.2449	39.1402	79.9454	51.0044	5.8631e+08	586.31	29.075	0.185897	0.735	3.02108	-0.801554	3.46834e+09	9.54012	-0.104557	60.2008	1.7796	384.58	0.038458	-1.41501	32.2155	1.50806	0.511
Mali	2002	2	1	4.32368	95.2056	106544	4.58387	19.7479	0.410831	0.921	0.815	1	10.2041	40.8296	80.5387	52.6653	6.7006e+08	670.06	29.806	0.227046	0.725	3.13442	-0.724598	3.90812e+09	9.59197	-0.243374	57.8293	1.76215	360.909	0.0360909	-1.4426	32.5228	1.51219	0.595
Mali	2003	2	1	4.1181	95.5651	68062	4.62514	20.9666	0.257702	0.921	0.83	1	10.2041	42.5278	81.1316	54.3201	7.6679e+08	766.79	30.547	0.310364	0.725	3.20676	-0.744712	4.71407e+09	9.6734	-0.131132	58.6281	1.76811	350.713	0.0350713	-1.45505	33.3768	1.52344	0.624
Mali	2004	2	1	3.91444	95.916	25957	4.66109	22.1933	0.452397	0.921	0.83	1	10.2041	44.235	81.724	55.9691	7.3807e+08	738.07	31.3	0.43282	0.725	3.26663	-0.677578	5.45425e+09	9.73673	-0.1004	55.3116	1.74282	353.036	0.0353036	-1.45218	32.5285	1.51226	0.624
Mali	2005	2	1	3.71299	96.2507	84505	4.69199	23.4264	0.173916	0.921	0.83	1	10.2041	45.951	82.3161	57.6097	8.8594e+08	885.94	32.06	0.507063	0.725	3.30546	-0.500253	6.24752e+09	9.79571	-0.224937	54.1253	1.7334	378.32	0.037832	-1.42214	33.103	1.51987	0.624
Mali	2006	2	1	3.51358	96.5602	435753	4.71798	24.6672	0.414197	0.921	0.83	1	10.2041	47.676	82.9077	59.2433	1.02716e+09	1027.16	32.832	0.729627	0.725	3.30569	-0.479206	6.90593e+09	9.83922	-0.0702875	60.9767	1.78516	429.56	0.042956	-1.36698	33.1637	1.52066	0.624
Mali	2007	2	1	3.31643	96.8668	33	4.73931	25.9144	0.230479	0.921	0.833	1	10.2041	49.4099	83.499	60.8679	9.3217e+08	932.17	33.612	0.81	0.725	3.30209	-0.426212	8.15647e+09	9.9115	-0.0655616	56.6497	1.7532	489.214	0.0489214	-1.3105	33.271	1.52207	0.609
Mali	2008	2	1	3.12145	97.1704	636116	4.75617	27.1687	0.209999	0.918	0.835	1	10.2041	51.1526	84.0898	62.484	8.6893e+08	868.93	34.403	1.57	0.725	3.28476	-0.537265	9.8384e+09	9.99292	-0.180426	63.476	1.80261	565.225	0.0565225	-1.24778	33.4546	1.52446	0.604
Mali	2009	2	1	2.92889	97.4709	246613	4.76884	28.4287	-0.0755776	0.922	0.835	1	10.2041	52.9043	84.6802	64.0894	8.7472e+08	874.72	35.2	1.8	0.725	3.25557	-0.680893	1.0232e+10	10.01	-0.752381	50.5192	1.70346	691.583	0.0691583	-1.16016	33.6385	1.52684	0.604
Mali	2010	2	1	2.73889	97.7682	865637	4.77758	29.6933	-0.182899	0.922	0.835	1	10.2041	54.6649	85.2702	65.6825	1.17334e+09	1173.34	35.999	2	0.725	3.24974	-0.676809	1.06892e+10	10.0289	-0.398893	57.9853	1.76332	757.354	0.0757354	-1.1207	33.6431	1.5269	0.604
Mali	2011	2	1	2.55151	98.0625	493486	4.78262	30.9622	-0.70838	0.929	0.835	1	10.2041	56.4344	85.8598	67.2627	1.29777e+09	1297.77	36.799	2.2	0.725	3.23481	-0.648009	1.29951e+10	10.1138	-0.552492	53.9136	1.7317	804.067	0.0804067	-1.09471	33.798	1.52889	0.607
Mali	2012	2	1	2.36677	98.3536	130415	4.78417	32.2352	-2.03433	0.919	0.83	1	10.2041	58.2128	86.449	68.8293	1.07105e+09	1071.05	37.599	2.8	0.663	2.91811	-0.831212	1.2442e+10	10.0949	-0.381893	59.1206	1.77174	830.399	0.0830399	-1.08071	33.9529	1.53088	0.352
Mali	2013	2	1	2.18471	98.6416	776684	4.78246	33.512	-1.72216	0.888	0.757	1	10.2041	60.0001	87.0378	70.382	1.41839e+09	1418.39	38.398	3.5	0.646	2.92004	-0.792036	1.32427e+10	10.122	-0.305085	64.8177	1.81169	830.251	0.0830251	-1.08079	34.1078	1.53285	0.327
Mali	2014	2	1	2.00531	98.9264	43226	4.77767	34.7924	-1.71399	0.881	0.806	1	9.52381	61.7963	87.6262	71.9206	1.25469e+09	1254.69	39.196	7	0.649	3.17068	-0.750902	1.43649e+10	10.1573	-0.1436	60.6387	1.78275	899.235	0.0899235	-1.04613	34.2627	1.53482	0.545
Mali	2015	2	1	1.82864	99.208	976	4.77003	36.0761	-1.68277	0.87	0.806	1	8.84354	63.6014	88.2142	73.4443	1.37983e+09	1379.83	39.991	10.33	0.701	3.14675	-0.704287	1.31048e+10	10.1174	-0.193154	63.6396	1.80373	952.776	0.0952776	-1.02101	34.4176	1.53678	0.544
Mali	2016	2	1	1.65465	99.4864	772652	4.75974	37.363	-1.61285	0.87	0.806	1	8.84354	65.4154	88.8018	74.953	1.38773e+09	1387.73	40.783	14	0.701	3.19044	-0.677368	1.4026e+10	10.1469	-0.259461	63.7633	1.80457	1172.19	0.117219	-0.931002	34.5733	1.53874	0.544
Mali	2017	2	1	1.48336	99.5592	457361	4.74698	38.653	-1.90349	0.851	0.803	1	8.84354	67.2383	89.389	76.4468	1.52566e+09	1525.66	41.572	18.9	0.683	3.21641	-0.666013	1.53657e+10	10.1866	-0.548238	58.0684	1.76394	1234.19	0.123419	-0.908617	34.7282	1.54068	0.53
Mali	2018	2	1	1.31477	99.5756	152113	4.73195	39.9458	-2.08457	0.848	0.794	1	8.84354	69.0701	89.9757	77.9249	1.6747e+09	1674.7	42.356	21.4	0.666	3.17485	-0.711568	1.70709e+10	10.2323	-0.467006	60.1448	1.7792	1243.77	0.124377	-0.905261	34.8831	1.54261	0.515
Mali	2019	2	1	1.14885	99.5925	856609	4.71483	41.2416	-2.21431	0.86	0.823	1	9.52381	70.9108	90.5621	79.3876	1.99361e+09	1993.61	43.136	22.3111	0.713	3.12667	-0.705256	1.72803e+10	10.2376	-0.858068	63.6587	1.80386	1231.72	0.123172	-0.90949	35.038	1.54454	0.511
Mali	2020	2	1	0.985616	99.6098	571394	4.6958	42.5396	-2.14635	0.825	0.781	1	27.8912	72.7604	91.148	80.8342	1.67299e+09	1672.99	43.909	28.3043	0.72	3.1426	-0.801557	1.74654e+10	10.2422	-0.535697	66.9906	1.82601	1142.88	0.114288	-0.941998	35.1929	1.54645	0.372
Mali	2021	2	1	0.825017	99.6057	295955	4.67504	43.8404	-2.33294	0.813	0.65	1	27.2727	74.619	91.7336	82.2653	1.43738e+09	1437.38	44.677	30.4642	0.745	3.15796	-0.888019	1.93095e+10	10.2858	-0.584069	67.2099	1.82743	1168.57	0.116857	-0.932346	35.3478	1.54836	0.243
Mali	2022	2	1	0.686503	54.2859	11338	4.6527	45.1434	-2.56074	0.72	0.656	1	28.5714	76.4864	92.3187	83.6801	1.23322e+09	1233.22	45.437	33.0528	0.742	3.09521	-0.87945	1.87803e+10	10.2737	-0.671836	68.7265	1.83712	1155.73	0.115573	-0.937145	35.2703	1.54741	0.233
Angola	2000	3	1	28.6957	62.232	72292	21.0877	33.8004	-2.03817	0.243	0.492	1	15.4545	16.8885	58.7232	58.7232	4.9277e+08	492.77	50.087	0.105046	0.469	3.31229	-1.19751	9.12959e+09	9.96045	-0.87862	104.952	2.02099	1979.26	0.197926	-0.703498	35.7127	1.55282	0.158
Angola	2001	3	1	28.0771	62.8112	111735	20.5565	34.2559	-1.80718	0.251	0.492	1	15.4545	16.8885	58.7232	58.7232	4.7758e+08	477.58	51.274	0.136014	0.486	3.35371	-1.1765	8.93608e+09	9.95115	-2.14547	104.601	2.01954	2079.73	0.207973	-0.681993	35.6261	1.55177	0.159
Angola	2002	3	1	27.4672	63.3912	141613	20.0144	34.7113	-1.57618	0.292	0.483	1	15.4545	16.8885	58.7232	58.7232	6.4744e+08	647.44	52.461	0.270377	0.593	3.40748	-1.15549	1.52856e+10	10.1843	-1.64339	105.302	2.02244	2143.53	0.214353	-0.668871	35.6445	1.55199	0.165
Angola	2003	3	1	26.5556	63.7711	67336	19.4072	35.7567	-1.00739	0.343	0.492	1	15.4545	17.7419	59.9725	59.9725	6.7841e+08	678.41	53.645	0.370682	0.631	3.49334	-1.33546	1.78127e+10	10.2507	-3.48107	103.901	2.01662	2298.9	0.22989	-0.638479	35.6934	1.55259	0.178
Angola	2004	3	1	25.6397	64.1419	218383	18.7906	36.8027	-1.06312	0.34	0.492	1	15	18.6093	61.2305	61.2305	1.43803e+09	1438.03	54.827	0.464815	0.629	3.59446	-1.37757	2.35521e+10	10.372	-1.41399	103.58	2.01528	2454.67	0.245467	-0.610007	35.5418	1.55074	0.176
Angola	2005	3	1	24.7222	64.5003	777518	18.1643	37.8465	-0.885178	0.356	0.492	1	15	19.4907	62.4972	62.4972	5.0346e+08	503.46	56	1.14337	0.624	3.64627	-1.32318	3.69709e+10	10.5679	1.5232	106.591	2.02772	2016.85	0.201685	-0.695326	35.44	1.54949	0.178
Angola	2006	3	1	23.9511	64.651	397855	17.5008	38.7339	-0.539453	0.356	0.492	1	15	20.386	63.7726	63.7726	2.0086e+08	200.86	56.764	1.5	0.624	3.68489	-1.24104	5.2381e+10	10.7192	0.2283	94.6252	1.97601	2453.25	0.245325	-0.610259	35.4031	1.54904	0.178
Angola	2007	3	1	23.1783	64.7947	27054	16.8332	39.6206	-0.666659	0.356	0.492	1	15	21.2954	65.0567	65.0567	2.4018e+08	240.18	57.524	1.7	0.624	3.74258	-1.30749	6.52664e+10	10.8147	1.80512	108.06	2.03367	2719.06	0.271906	-0.565581	35.4897	1.5501	0.178
Angola	2008	3	1	22.403	64.9321	664817	16.1617	40.5074	-0.361787	0.355	0.527	1	37.2727	22.2187	66.3495	66.3495	3.5669e+08	356.69	58.282	1.9	0.678	3.77829	-1.30876	8.85387e+10	10.9471	0.890673	121.365	2.08409	3072.02	0.307202	-0.512575	35.4496	1.54961	0.193
Angola	2009	3	1	21.6268	65.0616	311532	15.4865	41.3927	-0.347592	0.362	0.605	1	38.6364	23.156	67.651	67.651	241250000	241.25	59.034	2.3	0.68	3.80156	-1.39777	7.03072e+10	10.847	-2.19855	122.446	2.08795	3368.84	0.336884	-0.47252	35.7985	1.55386	0.223
Angola	2010	3	1	20.8486	65.1846	9668045	14.8077	42.2777	-0.226182	0.368	0.615	1	38.6364	24.1072	68.9612	68.9612	2.5088e+08	250.88	59.783	2.8	0.69	3.8511	-1.33247	8.37995e+10	10.9232	4.56764	104.124	2.01755	3560.09	0.356009	-0.448539	35.975	1.556	0.225
Angola	2011	3	1	20.0688	65.3006	630674	14.1257	43.1621	-0.369238	0.368	0.613	1	38.1818	25.0725	70.2801	70.2801	2.0297e+08	202.97	60.528	4.7	0.689	3.88795	-1.36747	1.1179e+11	11.0484	5.11641	99.9825	1.99992	3594.49	0.359449	-0.444363	36.3488	1.56049	0.311
Angola	2012	3	1	19.2877	65.4091	303167	13.4406	44.0453	-0.389323	0.367	0.611	1	34.0909	26.0517	71.6077	71.6077	2.5824e+08	258.24	61.268	7.7	0.688	3.88358	-1.3024	1.28053e+11	11.1074	2.3511	91.8001	1.96284	3615.52	0.361552	-0.441829	36.3383	1.56037	0.308
Angola	2013	3	1	18.5058	65.5099	984276	12.7526	44.9271	-0.391233	0.378	0.591	1	34.0909	27.0449	72.944	72.944	2.947e+08	294.7	62.002	13	0.699	3.84998	-1.33687	1.32339e+11	11.1217	8.04158	86.8119	1.93858	3897.91	0.389791	-0.409168	36.4867	1.56213	0.309
Angola	2014	3	1	17.7228	65.6034	673824	12.0619	45.8077	-0.333232	0.378	0.591	1	36.8182	28.052	74.2889	74.2889	2.4256e+08	242.56	62.731	21.3623	0.699	3.73273	-1.4578	1.35967e+11	11.1334	-2.77072	79.3329	1.89945	4135.05	0.413505	-0.38352	36.6359	1.56391	0.309
Angola	2015	3	1	16.9421	65.6856	372355	11.3686	46.6838	-0.505386	0.378	0.591	1	36.8182	29.0732	75.6426	75.6426	4.2613e+08	426.13	63.446	22	0.699	3.60507	-1.42732	9.04964e+10	10.9566	-10.8131	62.8885	1.79857	4159.58	0.415958	-0.380951	36.7282	1.565	0.309
Angola	2016	3	1	16.1631	65.7574	7951	10.6731	47.5559	-0.32158	0.378	0.591	1	36.8182	30.1083	77.005	77.005	2.3438e+08	234.38	64.149	23.2	0.699	3.57644	-1.48334	5.27616e+10	10.7223	0.452523	53.3702	1.7273	3661.55	0.366155	-0.436335	36.7562	1.56533	0.309
Angola	2017	3	1	15.3863	65.8186	795135	9.97567	48.4238	-0.387895	0.409	0.597	1	30.4545	31.1574	78.376	78.376	2.4774e+08	247.74	64.839	26	0.708	3.54061	-1.44433	7.36902e+10	10.8674	8.7493	52.2568	1.71814	3370.9	0.33709	-0.472255	36.7145	1.56484	0.323
Angola	2018	3	1	14.6125	65.8684	519142	9.27662	49.2865	-0.347209	0.562	0.647	1	30.4545	32.2205	79.7558	79.7558	1.7298e+08	172.98	65.514	29	0.727	3.45323	-1.19925	7.94507e+10	10.9001	6.46179	66.378	1.82202	3366.39	0.336639	-0.472835	36.7306	1.56503	0.372
Angola	2019	3	1	14.3503	66.1651	484594	9.28205	49.547	-0.368412	0.543	0.642	1	30	33.0027	80.0843	80.0843	2.13e+07	21.3	66.177	32.1294	0.736	3.38788	-1.05842	7.0898e+10	10.8506	1.74905	57.8295	1.76215	3667.42	0.366742	-0.435639	36.7987	1.56583	0.366
Angola	2020	3	1	14.0941	66.4551	450825	9.28735	49.8016	-0.599918	0.538	0.584	1	30	33.7849	80.4129	80.4129	1.1833e+08	118.33	66.825	36.6347	0.73	3.26796	-0.938673	4.85016e+10	10.6858	1.95698	65.942	1.81916	3527.16	0.352716	-0.452575	36.8108	1.56598	0.354
Angola	2021	3	1	13.843	66.7393	417732	9.29255	50.0511	-0.710481	0.481	0.596	1	29.5455	34.567	80.7414	80.7414	2.4716e+08	247.16	67.46	37.8067	0.7	3.18132	-0.65161	6.65051e+10	10.8229	3.29775	74.4645	1.87195	2791.33	0.279133	-0.554189	36.8148	1.56602	0.343
Angola	2022	3	1	13.5974	67.0172	38537	9.29763	50.2951	-0.630109	0.492	0.576	1	33.6364	35.3492	81.0699	81.0699	9.658e+07	96.58	68.081	39.2935	0.745	3.14303	-0.601941	1.044e+11	11.0187	6.63972	69.699	1.84323	3159.25	0.315925	-0.500417	36.8128	1.566	0.342
Bangladesh	2000	4	5	2.21208	95.9492	8387239	1.13028	23.6947	-0.726261	0.725	0.759	1	9.09091	93.5985	97.6602	94.5567	1.44528e+09	1445.28	23.59	0.0710394	0.66	1.90552	-1.21208	5.33698e+10	10.7273	-0.280385	29.3217	1.46719	1053.62	0.105362	-0.977315	72.2133	1.85862	0.51
Bangladesh	2001	4	5	2.13417	96.1195	7462933	1.12586	25.1768	-0.879426	0.733	0.737	1	5.54545	93.7816	97.7121	94.7287	1.45408e+09	1454.08	24.096	0.129808	0.618	1.89925	-1.33058	5.39913e+10	10.7323	-0.078527	32.098	1.50648	1181.62	0.118162	-0.927521	72.2363	1.85876	0.503
Bangladesh	2002	4	5	2.05397	96.2932	6528677	1.11939	26.6817	-1.03259	0.722	0.737	1	2	93.9647	97.764	94.9053	1.22292e+09	1222.92	24.756	0.13992	0.593	1.85803	-1.44909	5.47241e+10	10.7382	-0.0496624	28.9674	1.46191	1163.14	0.116314	-0.934369	71.8522	1.85644	0.471
Bangladesh	2003	4	5	1.97438	96.4653	5603361	1.11272	28.1773	-1.11558	0.735	0.749	1	2	94.1478	97.8158	95.0806	1.72401e+09	1724.01	25.429	0.163878	0.593	1.74654	-1.54172	6.01589e+10	10.7793	-0.265507	27.6579	1.44182	1208.15	0.120815	-0.917881	71.6601	1.85528	0.474
Bangladesh	2004	4	5	1.89544	96.6358	4687358	1.10585	29.663	-1.36048	0.735	0.749	1	2	94.331	97.8677	95.2545	1.75266e+09	1752.66	26.114	0.199036	0.593	1.66119	-1.59711	6.51085e+10	10.8136	-0.444837	26.8582	1.42908	1263.55	0.126355	-0.898409	71.6217	1.85504	0.474
Bangladesh	2005	4	5	1.8172	96.8047	3781132	1.09573	31.4358	-1.86384	0.735	0.749	1	14.7826	94.5638	97.9126	95.4616	1.50602e+09	1506.02	26.809	0.241637	0.664	1.51798	-1.40647	6.9476e+10	10.8418	-0.811382	34.3969	1.53652	1349.29	0.134929	-0.869894	71.5295	1.85449	0.474
Bangladesh	2006	4	5	1.73963	96.9719	2884711	1.08718	33.2264	-1.5071	0.698	0.743	1	15.0725	94.7968	97.9575	95.6666	1.19719e+09	1197.19	27.517	1	0.582	1.21059	-1.44298	7.17957e+10	10.8561	-0.452928	38.1119	1.58106	1442.49	0.144249	-0.840888	71.2914	1.85304	0.422
Bangladesh	2007	4	5	1.66278	97.1374	1998408	1.08028	35.034	-1.54307	0.562	0.582	1	14.9275	95.0301	98.0024	95.8694	9.2756e+08	927.56	28.237	1.8	0.62	1.05112	-1.06324	7.96116e+10	10.901	-0.516766	39.9424	1.60143	1467.89	0.146789	-0.833305	71.1838	1.85238	0.207
Bangladesh	2008	4	5	1.58668	97.3011	1122632	1.07508	36.8576	-1.50833	0.587	0.59	1	6.33333	95.2635	98.0473	96.0699	1.16901e+09	1169.01	28.968	2.5	0.623	0.887833	-1.04679	9.1637e+10	10.9621	-1.13776	42.6209	1.62962	1531.92	0.153192	-0.814763	71.084	1.85177	0.211
Bangladesh	2009	4	5	1.51137	97.4629	257668	1.07163	38.6964	-1.54677	0.591	0.729	1	18.5507	95.4971	98.0921	96.2681	1.06398e+09	1063.98	29.709	3.1	0.622	0.880093	-1.07525	1.02475e+11	11.0106	-0.720457	40.0928	1.60307	1671.76	0.167176	-0.776827	71.0302	1.85144	0.416
Bangladesh	2010	4	5	1.43684	97.6228	9403637	1.06997	40.5501	-1.42579	0.593	0.725	1	18.5507	95.7309	98.137	96.4638	1.42506e+09	1425.06	30.462	3.7	0.724	1.14155	-1.05408	1.15276e+11	11.0617	-1.16582	37.8028	1.57752	1691.53	0.169153	-0.771719	70.9918	1.85121	0.43
Bangladesh	2011	4	5	1.36313	97.7808	8561018	1.07017	42.4176	-1.40474	0.561	0.712	1	19.7143	95.9649	98.1818	96.6571	1.44063e+09	1440.63	31.225	4.5	0.732	1.21894	-1.09739	1.28607e+11	11.1093	-0.967291	47.4208	1.67597	1807.59	0.180759	-0.742899	70.1237	1.84586	0.42
Bangladesh	2012	4	5	1.29034	97.9367	7730045	1.07227	44.2976	-1.37909	0.55	0.702	1	19.7143	96.1991	98.2267	96.8478	2.15145e+09	2151.45	31.993	5	0.724	1.24357	-0.856619	1.33311e+11	11.1249	-1.29534	48.1109	1.68224	1939.32	0.193932	-0.71235	70.0853	1.84563	0.411
Bangladesh	2013	4	5	1.21852	98.0904	6911093	1.07631	46.1891	-1.62786	0.478	0.637	1	19.7143	96.4335	98.2715	97.0356	2.66339e+09	2663.39	32.762	6.63	0.707	1.26716	-0.893825	1.49999e+11	11.1761	-2.05609	46.2964	1.66555	1989.62	0.198962	-0.701231	71.276	1.85294	0.373
Bangladesh	2014	4	5	1.14763	98.242	6104043	1.0823	48.0919	-0.895563	0.437	0.581	1	19.8276	96.668	98.3163	97.2208	2.45711e+09	2457.11	33.535	11.9	0.71	1.24596	-0.89213	1.72887e+11	11.2378	-2.49742	44.5141	1.6485	2041.66	0.204166	-0.690017	71.5987	1.85491	0.291
Bangladesh	2015	4	5	1.07773	98.3914	530912	1.09026	50.005	-1.20977	0.414	0.553	1	20	96.9028	98.3612	97.4031	2.91503e+09	2915.03	34.308	12.9	0.697	1.19106	-0.844026	1.95147e+11	11.2904	-2.77125	42.086	1.62414	2439.45	0.243945	-0.612709	72.4763	1.8602	0.28
Bangladesh	2016	4	5	1.0088	98.5386	45262477	1.10019	51.9283	-1.25973	0.405	0.547	1	20	97.1378	98.406	97.5827	2.82871e+09	2828.71	35.083	18.1	0.691	1.2308	-0.886878	2.65225e+11	11.4236	-2.29221	31.3342	1.49602	2419.75	0.241975	-0.61623	73.1137	1.864	0.279
Bangladesh	2017	4	5	0.940853	98.6836	37555438	1.1121	53.861	-1.25363	0.381	0.533	1	20.2857	97.3729	98.4508	97.7594	4.12468e+09	4124.68	35.858	21.5	0.684	1.24972	-0.858939	2.93732e+11	11.468	-1.68365	29.9997	1.47712	2489.82	0.248982	-0.603831	73.4526	1.86601	0.273
Bangladesh	2018	4	5	0.873907	98.8264	2996881	1.12599	55.8027	-0.985569	0.392	0.478	1	20.2857	97.6083	98.4956	97.9333	3.20861e+09	3208.61	36.632	25.6	0.677	1.16138	-0.926947	3.21363e+11	11.507	-2.40242	32.5146	1.51208	2628.24	0.262824	-0.580335	73.9594	1.86899	0.26
Bangladesh	2019	4	5	0.807959	98.967	22503568	1.14187	57.7529	-0.928629	0.344	0.435	1	20.6304	97.8438	98.5404	98.1044	4.69434e+09	4694.34	37.405	30.4	0.668	1.11317	-1.01699	3.51232e+11	11.5456	-1.88498	31.5781	1.49939	2914.89	0.291489	-0.535377	75.8393	1.87989	0.253
Bangladesh	2020	4	5	0.743005	99.1054	15158977	1.15973	59.7112	-0.915817	0.367	0.456	1	20.9169	98.0795	98.5852	98.2726	5.53043e+09	5530.43	38.177	36.1091	0.675	1.14421	-1.00368	3.73979e+11	11.5728	-1.5205	26.2714	1.41948	2731.39	0.273139	-0.563617	76.2695	1.88235	0.257
Bangladesh	2021	4	5	0.678777	99.2123	1088879	1.17931	61.6771	-1.03688	0.362	0.443	1	20.8571	98.3155	98.6299	98.4379	5.08911e+09	5089.11	38.946	38.9174	0.685	1.14932	-0.985861	4.16272e+11	11.6194	-1.64067	27.724	1.44286	2907.37	0.290737	-0.5365	77.345	1.88843	0.252
Bangladesh	2022	4	5	0.615321	99.2841	10052952	1.18709	63.6503	-1.04646	0.379	0.489	1	20.8571	98.5165	98.6747	98.5793	5.74333e+09	5743.33	39.711	41.6152	0.676	1.07484	-1.07553	4.60132e+11	11.6629	-1.60329	33.78	1.52866	3025.79	0.302579	-0.519161	76.8073	1.8854	0.262
Madagascar	2000	5	1	37.4459	100	656027	1.94992	3.82452	0.162799	0.768	0.852	1	8	23.376	71.5555	36.4428	4.9958e+08	499.58	27.121	0.196395	0.665	3.0399	-0.47863	4.62925e+09	9.66551	-0.0829526	42.7771	1.63121	591.201	0.0591201	-1.22827	69.6427	1.84288	0.507
Madagascar	2001	5	1	36.2792	100	10748	2.03266	4.27624	-0.0312548	0.768	0.852	1	8	24.0404	71.8523	37.1366	6.0516e+08	605.16	27.391	0.222512	0.665	2.99623	-0.238703	5.43833e+09	9.73547	-0.0930592	41.0351	1.61316	563.039	0.0563039	-1.24946	70.2325	1.84654	0.505
Madagascar	2002	5	1	35.1156	100	55469	2.11703	4.72902	-0.225308	0.713	0.818	1	8	24.7047	72.1466	37.8285	5.8368e+08	583.68	27.663	0.33972	0.622	2.96157	0.00122348	5.3517e+09	9.72849	-0.0146618	50.1817	1.70055	422.233	0.0422232	-1.37445	70.2325	1.84654	0.429
Madagascar	2003	5	1	33.9556	100	997791	2.20305	5.18344	0.622444	0.775	0.81	1	3.75	25.3689	72.4384	38.5182	7.3897e+08	738.97	27.936	0.423252	0.65	2.93342	-0.208431	6.3725e+09	9.80431	-0.0128741	34.0306	1.53187	524.767	0.0524767	-1.28003	70.2325	1.84654	0.492
Madagascar	2004	5	1	32.7988	100	436579	2.29074	5.6388	0.24557	0.775	0.81	1	6.875	26.033	72.7278	39.206	1.52771e+09	1527.71	28.211	0.525354	0.65	2.92703	-0.323701	5.06473e+09	9.70456	-0.0529107	48.7754	1.6882	554.304	0.0554304	-1.25625	70.2325	1.84654	0.492
Madagascar	2005	5	1	31.549	100	809132	2.38655	6.12117	-0.0185726	0.775	0.81	1	6.875	26.6969	73.0146	40.0429	1.09896e+09	1098.96	28.814	0.567722	0.65	2.92329	-0.0555556	5.85927e+09	9.76784	-0.0504911	59.1301	1.77181	520.999	0.0520999	-1.28316	70.3185	1.84707	0.492
Madagascar	2006	5	1	30.3055	100	171385	2.48529	6.60626	0.185515	0.749	0.81	1	6.875	27.3608	73.299	40.8781	9.1992e+08	919.92	29.425	0.607552	0.647	2.92675	-0.182528	6.39571e+09	9.80589	-0.283515	62.1028	1.79311	498.275	0.0498275	-1.30253	70.3185	1.84707	0.482
Madagascar	2007	5	1	29.0686	38.898	52337	2.58702	7.09405	0.0896257	0.758	0.811	1	7.87402	28.0246	73.5809	41.711	7.3846e+08	738.46	30.043	0.65	0.705	2.92652	-0.186033	8.52462e+09	9.93068	-0.750911	66.7027	1.82414	516.442	0.0516442	-1.28698	70.3185	1.84707	0.495
Madagascar	2008	5	1	27.838	39.6133	86452	2.69188	7.58477	-0.469336	0.758	0.813	1	7.87402	28.6882	73.8603	42.5425	6.4872e+08	648.72	30.67	1.65	0.747	2.91149	-0.266752	1.07251e+10	10.0304	-1.0899	74.3574	1.87132	531.468	0.0531468	-1.27452	70.3219	1.84709	0.501
Madagascar	2009	5	1	26.6152	40.3297	195719	2.79982	8.07809	-0.733878	0.643	0.749	1	7.87402	29.3518	74.1372	43.3701	4.2288e+08	422.88	31.301	1.63	0.68	2.89947	-0.328544	9.61688e+09	9.98303	-1.26715	62.4117	1.79527	455.507	0.0455507	-1.3415	70.3219	1.84709	0.275
Madagascar	2010	5	1	25.3998	41.0466	516436	2.91097	8.57423	-0.978339	0.663	0.656	1	12.5	30.0152	74.4116	44.1945	5.1343e+08	513.43	31.938	1.7	0.678	2.86595	-0.417825	9.98271e+09	9.99925	-0.86874	57.8749	1.76249	469.251	0.0469251	-1.32859	70.3219	1.84709	0.226
Madagascar	2011	5	1	24.1921	41.7646	826777	3.02538	9.07317	-0.705586	0.663	0.656	1	12.5	30.6785	74.6836	45.0154	4.5146e+08	451.46	32.58	1.9	0.758	2.80017	-0.48461	1.15518e+10	10.0627	-0.773203	56.4831	1.75192	511.37	0.051137	-1.29126	70.2911	1.8469	0.226
Madagascar	2012	5	1	22.9923	42.6418	126627	3.14313	9.57498	-0.536137	0.665	0.656	1	17.4863	31.3418	74.9531	45.8325	3.8158e+08	381.58	33.227	2.3	0.758	2.72814	-0.670311	1.1579e+10	10.0637	-0.778361	52.6517	1.72141	587.695	0.0587695	-1.23085	70.2911	1.8469	0.227
Madagascar	2013	5	1	21.8007	43.5231	416128	3.26425	10.0796	-0.659993	0.693	0.769	1	17.4863	32.0049	75.2201	46.6453	5.0581e+08	505.81	33.878	3	0.783	2.67159	-0.763889	1.24236e+10	10.0942	-0.550243	56.3676	1.75103	600.29	0.060029	-1.22164	70.2905	1.8469	0.252
Madagascar	2014	5	1	20.6171	44.408	694942	3.38886	10.5872	-0.557236	0.742	0.842	1	20.5298	32.6679	75.4846	47.4542	5.978e+08	597.8	34.534	3.7	0.798	2.62714	-0.842871	1.2523e+10	10.0977	-0.336112	61.9694	1.79218	635.025	0.0635025	-1.19721	70.2905	1.8469	0.451
Madagascar	2015	5	1	19.4421	45.2974	963478	3.51696	11.0977	-0.427763	0.779	0.842	1	20.5298	33.3308	75.7466	48.2582	7.7305e+08	773.05	35.193	4.17397	0.798	2.58819	-0.880012	1.1323e+10	10.054	-0.246135	61.2204	1.7869	676.742	0.0676742	-1.16958	70.2905	1.8469	0.473
Madagascar	2016	5	1	18.2756	46.189	221409	3.64865	11.6112	-0.294186	0.784	0.855	1	20.5298	33.9936	76.0061	49.0576	7.0942e+08	709.42	35.856	4.71366	0.795	2.58601	-0.934489	1.18486e+10	10.0737	-0.451115	60.8347	1.78415	691.369	0.0691369	-1.16029	70.2905	1.8469	0.479
Madagascar	2017	5	1	17.1178	47.0837	468912	3.78397	12.1276	-0.302837	0.785	0.843	1	19.2053	34.6563	76.2632	49.8519	867750000	867.75	36.522	6.4	0.795	2.58416	-1.07452	1.31763e+10	10.1198	-0.358891	65.3434	1.8152	617.702	0.0617702	-1.20922	70.2905	1.8469	0.476
Madagascar	2018	5	1	15.9688	47.9811	705942	3.92298	12.647	-0.578798	0.827	0.852	1	19.2053	35.3188	76.5178	50.6411	8.0526e+08	805.26	37.191	8.7	0.762	2.55408	-1.02054	1.376e+10	10.1386	-0.49414	67.8415	1.8315	579.6	0.05796	-1.23687	70.2905	1.8469	0.498
Madagascar	2019	5	1	14.8291	48.8811	932999	4.06566	13.1693	-0.313957	0.74	0.844	1	15.894	35.9813	76.7699	51.4243	7.9526e+08	795.26	37.861	11.8314	0.745	2.52532	-1.05221	1.41047e+10	10.1494	-0.372693	62.6013	1.79658	678.704	0.0678704	-1.16832	70.2905	1.8469	0.495
Madagascar	2020	5	1	13.6983	49.7832	14947	4.21217	13.6947	-0.509335	0.74	0.839	1	17.8808	36.6437	77.0195	52.2021	1.37315e+09	1373.15	38.534	15.8196	0.753	2.48242	-1.00964	1.30514e+10	10.1157	-0.239374	49.0107	1.69029	447.504	0.0447504	-1.3492	70.2905	1.8469	0.501
Madagascar	2021	5	1	12.5771	50.688	356207	4.36243	14.223	-0.542263	0.726	0.839	1	17.8808	37.3059	77.2666	52.9733	1.06826e+09	1068.26	39.207	18.1313	0.744	2.41687	-0.952459	1.45548e+10	10.163	-0.243209	54.457	1.73605	507.644	0.0507644	-1.29444	70.2905	1.8469	0.497
Madagascar	2022	5	1	11.4649	51.5944	552584	4.51659	14.7543	-0.480797	0.725	0.839	1	18.543	37.9681	77.5112	53.7387	1.04292e+09	1042.92	39.882	20.5777	0.747	2.3787	-1.00865	1.53025e+10	10.1848	-0.325831	69.6047	1.84264	477.574	0.0477574	-1.32096	70.2905	1.8469	0.497
Mexique	2000	6	4	2.44087	99.6524	834293	1.12045	79.2052	-0.20021	0.775	0.797	1	16	77.5129	96.3152	91.5623	-5.03e+06	-5.03	74.722	5.08138	0.661	1.54273	-0.0738603	7.42061e+11	11.8704	-18.3823	49.9104	1.69819	17300.7	1.73007	0.238063	54.6979	1.73797	0.671
Mexique	2001	6	4	2.41383	99.6865	4344106	0.977663	79.9106	-0.129259	0.775	0.818	1	16	78.6335	96.5044	92.0447	1.654e+08	165.4	75.045	7.03802	0.661	1.48303	-0.162216	7.96065e+11	11.9009	-25.6561	44.7401	1.6507	16898.3	1.68983	0.227843	54.8111	1.73887	0.682
Mexique	2002	6	4	2.38705	99.7207	388446	0.834941	80.606	-0.0583083	0.797	0.818	1	16	79.7619	96.6938	92.5227	2.0852e+08	208.52	75.365	11.9	0.661	1.43771	-0.250572	8.10666e+11	11.9088	-23.1966	45.2098	1.65523	17044.3	1.70443	0.231579	54.8111	1.73887	0.691
Mexique	2003	6	4	2.23575	99.7549	7722955	0.692344	81.2915	-0.116878	0.797	0.819	1	22.6	80.8982	96.8833	92.9961	1.6017e+08	160.17	75.682	12.9	0.692	1.39826	-0.241587	7.6555e+11	11.884	-16.9965	48.7004	1.68753	16996.6	1.69966	0.230361	54.8111	1.73887	0.699
Mexique	2004	6	4	2.08737	99.7892	5071397	0.549912	81.9676	-0.214082	0.797	0.821	1	22.6	82.0424	97.0729	93.4651	1.7373e+08	173.73	75.997	14.1	0.692	1.36531	-0.389335	8.19459e+11	11.9135	-20.5837	52.0406	1.71634	17731.3	1.77313	0.24874	54.8214	1.73895	0.707
Mexique	2005	6	4	1.94203	99.8236	243486	0.407736	82.634	-0.445821	0.797	0.821	1	24.2	83.1943	97.2626	93.9296	2.6236e+08	262.36	76.308	17.21	0.692	1.34858	-0.34418	9.17572e+11	11.9626	-19.3268	52.5626	1.72068	19153.7	1.91537	0.282253	54.8214	1.73895	0.707
Mexique	2006	6	4	1.79961	99.8582	981237	0.265847	83.2911	-0.636888	0.793	0.815	1	22.6	84.3541	97.4525	94.3895	3.1047e+08	310.47	76.616	19.52	0.694	1.35375	-0.325125	1.02027e+12	12.0087	-15.451	54.4821	1.73625	19171.5	1.91715	0.282655	54.8214	1.73895	0.67
Mexique	2007	6	4	1.66014	99.8928	7204406	0.124299	83.9389	-0.729852	0.797	0.814	1	23.2	85.5218	97.6424	94.845	1.406e+08	140.6	76.92	20.81	0.702	1.40789	-0.341457	1.10236e+12	12.0423	-22.6876	55.2585	1.7424	19098.8	1.90988	0.281006	54.8882	1.73948	0.642
Mexique	2008	6	4	1.52344	99.9275	4609678	0.195073	84.5779	-0.804012	0.791	0.807	1	23.2	86.6324	97.8297	95.2792	1.8074e+08	180.74	77.222	21.71	0.699	1.46016	-0.30985	1.16155e+12	12.065	-29.0652	56.3653	1.75101	19633.8	1.96338	0.293004	53.1675	1.72565	0.642
Mexique	2009	6	4	1.3896	99.9622	202903	0.159686	85.2079	-0.686628	0.787	0.808	1	23.2	87.3098	97.9848	95.585	2.3038e+08	230.38	77.52	26.34	0.717	1.46192	-0.36596	9.43437e+11	11.9747	-7.98907	54.5917	1.73713	19065.6	1.90656	0.280251	52.8213	1.72281	0.646
Mexique	2010	6	4	1.25851	99.9958	946172	0.177379	85.8292	-0.726463	0.789	0.816	1	26.2	87.9873	98.1398	95.8875	519750000	519.75	77.815	31.05	0.726	1.43974	-0.439748	1.10542e+12	12.0435	-12.6298	59.2734	1.77286	18887.5	1.88875	0.276174	52.3712	1.71909	0.651
Mexique	2011	6	4	1.12996	100	6905828	0.168533	86.4429	-0.667769	0.785	0.816	1	26.2	88.6647	98.2949	96.187	1.03749e+09	1037.49	78.111	37.1763	0.731	1.41535	-0.474738	1.22901e+12	12.0896	-12.322	62.1624	1.79353	19464.5	1.94645	0.289244	52.1217	1.71702	0.652
Mexique	2012	6	4	1.00408	100	4362562	0.172956	87.0483	-0.662454	0.796	0.812	1	36.8	89.3422	98.45	96.4831	4.7037e+08	470.37	78.405	39.75	0.75	1.35716	-0.484528	1.25511e+12	12.0987	0.543219	64.2579	1.80793	19367.4	1.93674	0.287071	51.705	1.71353	0.649
Mexique	2013	6	4	0.880772	97.4211	183114	0.170744	87.6459	-0.714224	0.77	0.78	1	36.8	90.0196	98.6051	96.7763	6.0183e+08	601.83	78.699	43.46	0.752	1.29731	-0.59152	1.32744e+12	12.123	-32.8958	62.6917	1.79721	19122.2	1.91222	0.281538	51.1772	1.70908	0.619
Mexique	2014	6	4	0.76004	97.4211	9311401	0.17185	88.2359	-0.853919	0.771	0.78	1	37.4	90.697	98.7601	97.0663	8.4711e+08	847.11	78.993	44.3857	0.758	1.21003	-0.84265	1.36451e+12	12.135	-22.8441	64.0984	1.80685	18782.8	1.87828	0.273761	50.7976	1.70584	0.621
Mexique	2015	6	4	0.641935	97.4211	6804177	0.171297	88.8179	-0.80178	0.795	0.793	1	42.3695	91.3745	98.9152	97.3531	3.7234e+08	372.34	79.285	57.431	0.757	1.06956	-0.88869	1.21329e+12	12.084	-25.2716	70.413	1.84765	18355.6	1.83556	0.263768	50.7626	1.70554	0.636
Mexique	2016	6	4	0.526386	97.1285	4308668	0.171574	89.3924	-0.633718	0.795	0.796	1	42.4	92.0519	99	97.6369	9.3847e+08	938.47	79.577	59.5404	0.757	0.969124	-0.850072	1.11223e+12	12.0462	-31.0298	75.6903	1.87904	18543.5	1.85435	0.268193	50.5867	1.70404	0.638
Mexique	2017	6	4	0.413429	97.1285	1825513	0.171435	89.9592	-0.80642	0.771	0.802	1	42.6	92.7294	99	97.9175	8.4931e+08	849.31	79.867	53.0318	0.773	0.935239	-0.951904	1190721475906	12.0758	-30.0695	76.9521	1.88622	18668.8	1.86688	0.271117	49.8706	1.69784	0.636
Mexique	2018	6	4	0.303024	97.1251	9354303	0.171505	90.5186	-0.673847	0.842	0.799	1	48.2	93.4068	99	98.195	5.9085e+08	590.85	80.156	56.6596	0.802	0.946602	-0.948684	1.2563e+12	12.0991	-25.6119	80.2127	1.90424	18266.3	1.82663	0.261651	49.6494	1.69591	0.673
Mexique	2019	6	4	0.195159	97.1218	68948835	0.17147	91.0705	-0.841869	0.795	0.832	1	48.2	94.0842	99	98.4694	5.7441e+08	574.41	80.444	69.6321	0.811	0.950144	-0.917185	1.30521e+12	12.1157	-23.8619	77.3964	1.88872	17919.1	1.79191	0.253316	49.4385	1.69407	0.675
Mexique	2020	6	4	0.093834	97.0711	53746146	0.171487	91.6152	-0.791456	0.757	0.812	1	48.2	94.7617	99	98.7408	8.281e+08	828.1	80.731	71.4902	0.8	0.820454	-0.921505	1.12083e+12	12.0495	-26.4902	76.8703	1.88576	16205.9	1.62059	0.209673	49.9694	1.6987	0.652
Mexique	2021	6	4	0.00587642	96.9545	45412087	0.171479	92.1526	-0.687616	0.76	0.755	1	50	95.4391	99	99	5.6366e+08	563.66	81.016	75.6265	0.788	0.667405	-1.02031	1.31307e+12	12.1183	-33.954	83.2907	1.9206	17172.9	1.71729	0.234844	49.9632	1.69865	0.613
Mexique	2022	6	4	0.0498552	96.8378	29357055	0.171483	92.6615	-0.689268	0.7	0.763	1	50	96.1166	99	99	5.1537e+08	515.37	81.3	78.6322	0.773	0.753117	-1.01187	1.46332e+12	12.1653	-21.7802	88.4485	1.94669	17827.5	1.78275	0.251091	49.9663	1.69868	0.571
Brazil	2000	7	4	0.861304	94.0771	61613	0.605558	73.3662	0.184102	0.928	0.938	1	5.65302	73.6064	98.1597	93.5417	312500000	312.5	81.192	2.87069	0.795	1.36677	0.0132388	6.55448e+11	11.8165	-30.4977	22.6398	1.35487	13400.3	1.34003	0.127115	27.3175	1.43644	0.856
Brazil	2001	7	4	0.851178	94.4184	7304726	0.604006	74.2359	0.255951	0.928	0.938	1	6.82261	74.5833	98.234	93.8712	3.8505e+08	385.05	81.553	4.52849	0.798	1.32069	0.0475905	5.59984e+11	11.7482	-24.7149	26.9363	1.43034	12893.8	1.28938	0.110382	27.3299	1.43664	0.856
Brazil	2002	7	4	0.910913	94.7455	343624	0.602973	75.0868	0.3278	0.929	0.938	1	6.23782	75.5603	98.3084	94.1864	3.2556e+08	325.56	81.88	9.14943	0.818	1.26284	0.0819423	5.09795e+11	11.7074	-14.1081	27.6184	1.4412	13021.8	1.30218	0.114671	27.3423	1.43684	0.855
Brazil	2003	7	4	0.9678	95.0653	9668598	0.601814	75.9322	0.00421393	0.924	0.939	1	8.577	76.5372	98.3828	94.4949	2.7815e+08	278.15	82.203	13.2076	0.822	1.18567	0.090239	5.58234e+11	11.7468	-9.89422	28.1404	1.44933	13111.9	1.31119	0.117666	27.3547	1.43703	0.853
Brazil	2004	7	4	1.02193	95.3779	6001506	0.600557	76.7719	-0.275993	0.924	0.939	1	8.577	77.5141	98.4571	94.7965	1.9928e+08	199.28	82.521	19.0737	0.822	1.13939	-0.0272687	6.69289e+11	11.8256	-8.3389	29.6783	1.47244	13593.7	1.35937	0.133338	27.3671	1.43723	0.853
Brazil	2005	7	4	1.07339	95.6833	2432714	0.599207	77.606	-0.26338	0.936	0.939	1	8.577	78.4911	98.5315	95.0914	2.5297e+08	252.97	82.834	21.0227	0.814	1.1172	-0.153748	8.91634e+11	11.9502	-12.5496	27.0868	1.43276	13792.5	1.37925	0.139642	27.3795	1.43743	0.868
Brazil	2006	7	4	1.12217	95.9819	8958957	0.597744	78.435	-0.294911	0.936	0.94	1	8.77193	79.468	98.6059	95.3798	122500000	122.5	83.143	28.1784	0.812	1.07735	-0.12048	1.10763e+12	12.0444	9.38028	26.0417	1.41567	14020.7	1.40207	0.146769	27.3926	1.43763	0.869
Brazil	2007	7	4	1.16835	96.2738	5578518	0.596173	79.259	-0.357948	0.928	0.941	1	8.96686	80.445	98.6803	95.662	3.4402e+08	344.02	83.448	30.88	0.816	1.03203	-0.0839888	1.39711e+12	12.1452	-27.5182	25.2926	1.40299	14770.4	1.47704	0.169391	27.4788	1.439	0.866
Brazil	2008	7	4	1.21197	96.5591	2289696	0.594498	80.0781	-0.313425	0.928	0.941	1	8.96686	81.4219	98.7546	95.9379	4.6295e+08	462.95	83.749	33.83	0.815	0.987284	0.00343737	1.69586e+12	12.2294	-24.6011	27.2576	1.43549	15255.1	1.52551	0.183415	27.5651	1.44036	0.866
Brazil	2009	7	4	1.25322	96.8376	9092108	0.592772	80.8915	0.163664	0.928	0.941	1	8.96686	82.3989	98.829	96.2074	4.0244e+08	402.44	84.044	39.22	0.813	0.953148	-0.0799856	1.667e+12	12.2219	-36.0328	22.106	1.34451	15004.2	1.50042	0.176214	27.6513	1.44172	0.866
Brazil	2010	7	4	1.29204	97.1098	5982084	0.590951	81.7001	0.0134759	0.929	0.942	1	8.577	83.3758	98.9034	96.471	5.1154e+08	511.54	84.335	40.65	0.822	0.939418	0.0438064	2.20884e+12	12.3442	-55.6269	22.7722	1.3574	16220.9	1.62209	0.210076	27.7375	1.44307	0.867
Brazil	2011	7	4	1.32783	97.3768	2953869	0.588813	82.5075	-0.132575	0.929	0.943	1	8.577	84.3528	98.9777	96.73	7.9508e+08	795.08	84.631	45.69	0.827	0.92859	0.168382	2.61616e+12	12.4177	-86.3601	23.9344	1.37902	16629.8	1.66298	0.220888	27.8238	1.44442	0.872
Brazil	2012	7	4	1.36121	97.6376	12295	0.586581	83.3102	0.0459616	0.927	0.937	1	8.577	85.3297	99	96.9832	1.35406e+09	1354.06	84.923	48.56	0.828	0.900343	-0.0468542	2.46523e+12	12.3919	-90.4851	25.1143	1.39992	16963.5	1.69635	0.229515	27.91	1.44576	0.871
Brazil	2013	7	4	1.33877	97.892	76924706	0.584312	84.1076	-0.258553	0.932	0.937	1	8.577	86.3067	99	97.2303	1.04097e+09	1040.97	85.209	51.04	0.809	0.868346	-0.0976997	2.47282e+12	12.3932	-59.5675	25.786	1.41138	17221.4	1.72214	0.236069	27.9963	1.4471	0.878
Brazil	2014	7	4	1.31656	98.1405	5429238	0.581933	84.9008	-0.0702901	0.935	0.938	1	9.94152	87.2836	99	97.4719	9.0199e+08	901.99	85.492	54.551	0.814	0.857835	-0.365746	2.45604e+12	12.3902	-67.1071	24.6854	1.39244	17519	1.7519	0.24351	28.0825	1.44844	0.877
Brazil	2015	7	4	1.29475	98.3831	3221872	0.5795	85.6892	-0.331864	0.923	0.935	1	9.94152	88.2605	99	97.7078	1.16687e+09	1166.87	85.77	58.328	0.818	0.845993	-0.457373	1.80221e+12	12.2558	-61.6042	26.9536	1.43062	17140.2	1.71402	0.234015	28.1687	1.44977	0.868
Brazil	2016	7	4	1.26564	98.5301	20426458	0.574253	86.4725	-0.381035	0.815	0.901	1	9.94152	89.12	99	97.9218	7.9324e+08	793.24	86.042	60.8725	0.772	0.811256	-0.445451	1.79569e+12	12.2542	-59.6011	24.5337	1.38976	16591.8	1.65918	0.219893	28.255	1.45109	0.778
Brazil	2017	7	4	1.2802	98.4566	1492676	0.399776	87.2513	-0.479948	0.817	0.898	1	10.7212	90.2144	99	98.1979	3.1411e+08	314.11	86.309	67.4713	0.768	0.792263	-0.559336	2.06351e+12	12.3146	-47.545	24.3197	1.38596	16608.7	1.66087	0.220335	28.3411	1.45242	0.773
Brazil	2018	7	4	1.27292	98.4933	92387486	0.396631	88.025	-0.459599	0.794	0.884	1	15.0097	91.1914	99	98.558	4.7729e+08	477.29	86.569	70.4343	0.761	0.793768	-0.480606	1.91693e+12	12.2826	-76.1593	28.8762	1.46054	16539.1	1.65391	0.218512	28.4156	1.45356	0.748
Brazil	2019	7	4	1.27656	98.475	7037983	0.360658	88.7944	-0.714225	0.732	0.88	1	15.0097	92.1683	99	98.7731	3.0496e+08	304.96	86.824	73.9124	0.765	0.766108	-0.407679	1.87329e+12	12.2726	-46.3548	28.8903	1.46075	16681.9	1.66819	0.222247	28.4901	1.45469	0.691
Brazil	2020	7	4	1.27474	98.4841	5525922	0.126549	89.5591	-0.446891	0.714	0.888	1	14.6199	94.0213	99	99	6.4741e+08	647.41	87.073	81.3427	0.765	0.665177	-0.428935	1.47611e+12	12.1691	-41.7374	32.3021	1.50923	15921.3	1.59213	0.201979	28.5646	1.45583	0.696
Brazil	2021	7	4	1.27565	98.4795	4105989	0.243603	90.3198	-0.41988	0.692	0.872	1	15.2047	96.7093	99	99	1.11454e+09	1114.54	87.317	80.6899	0.764	0.52859	-0.498798	1.67065e+12	12.2229	-30.2012	37.6563	1.57584	16660	1.666	0.221674	28.6391	1.45696	0.675
Brazil	2022	7	4	1.27519	98.4818	4062287	0.185076	91.0197	-0.395037	0.705	0.888	1	17.7388	98.1569	99	99	6.0247e+08	602.47	87.555	80.5278	0.774	0.459584	-0.566063	1.95192e+12	12.2905	-41.2518	38.8161	1.58901	17333.8	1.73338	0.238894	28.6019	1.45639	0.692
Congo république du	2000	8	1	17.527	99.8802	46487	9.75803	11.9201	-2.47424	0.575	0.126	1	12	19.5958	70.7139	37.5495	3.0285e+08	302.85	35.122	0.0263547	0.413	2.89884	-1.45917	1.9088e+10	10.2808	-0.191041	27.0144	1.4316	438.74	0.043874	-1.35779	11.2922	1.05278	0.152
Congo république du	2001	8	1	17.026	99.8803	382942	9.76581	11.9685	-2.22508	0.575	0.187	1	12	19.4165	70.2921	37.5216	4.2393e+08	423.93	35.587	0.0322236	0.413	3.01947	-1.45457	7.43819e+09	9.87147	-0.188819	25.0419	1.39867	418.631	0.0418631	-1.37817	11.2702	1.05193	0.159
Congo république du	2002	8	1	16.5281	99.8804	294548	9.67728	12.2943	-1.97593	0.575	0.237	1	12	19.2293	69.8611	37.4846	1.84808e+09	1848.08	36.055	0.15725	0.413	3.057	-1.44997	8.72804e+09	9.94092	-0.193263	29.3168	1.46712	417.325	0.0417325	-1.37953	11.2702	1.05193	0.164
Congo république du	2003	8	1	16.0334	99.8805	199635	9.59078	12.6237	-2.02787	0.575	0.393	1	12	19.0342	69.4209	37.4384	7.51151e+09	7511.51	36.526	0.460014	0.414	2.94405	-1.52646	8.93757e+09	9.95122	-0.184375	54.0314	1.73265	421.695	0.0421694	-1.375	11.2702	1.05193	0.185
Congo république du	2004	8	1	15.5419	99.8806	9815	9.75761	13.0815	-2.38776	0.598	0.413	1	12	18.8312	68.9715	37.3831	2.35267e+09	2352.67	37	1.0775	0.484	2.98106	-1.44469	1.02975e+10	10.0127	-0.20215	49.3364	1.69317	463.926	0.0463926	-1.33355	11.2702	1.05193	0.191
Congo république du	2005	8	1	15.053	99.8807	98863	9.90635	13.5511	-2.12856	0.647	0.449	1	12	18.6202	68.5128	37.3205	2.20614e+09	2206.14	37.481	1.46342	0.495	3.11546	-1.44338	1.19645e+10	10.0779	-0.1666	52.3146	1.71862	487.926	0.0487926	-1.31165	11.2702	1.05193	0.204
Congo république du	2006	8	1	14.5663	99.8809	870243	10.0375	14.0325	-2.24673	0.653	0.531	1	8.4	18.4014	68.045	37.2515	2.67969e+09	2679.69	37.971	2.00799	0.479	3.18717	-1.54051	1.44519e+10	10.1599	-0.2377	47.9633	1.68091	498.666	0.0498666	-1.30219	11.286	1.05254	0.256
Congo république du	2007	8	1	14.0819	45.0081	74283	10.1516	14.526	-2.1785	0.649	0.594	1	8.4	18.1746	67.568	37.1762	1.21574e+09	1215.74	38.47	2.7597	0.479	3.21554	-1.38107	1.67371e+10	10.2237	-1.7937	80.1421	1.90386	497.544	0.0497544	-1.30317	11.3143	1.05363	0.364
Congo république du	2008	8	1	13.6003	45.5911	606964	10.2492	15.032	-2.00308	0.665	0.583	1	8.4	17.9399	67.0818	37.0934	1.51674e+09	1516.74	38.976	4.28751	0.479	3.19974	-1.26119	1.97885e+10	10.2964	-1.6727	83.7723	1.9231	456.029	0.0456029	-1.34101	11.3363	1.05447	0.363
Congo république du	2009	8	1	13.1212	46.1774	46178	10.3307	15.5507	-2.00098	0.664	0.602	1	8.4	17.6973	66.5864	37.0041	2.10914e+09	2109.14	39.491	4.5	0.479	3.19425	-1.41293	1.86484e+10	10.2706	0.278	62.9469	1.79897	432.157	0.0432157	-1.36436	11.8599	1.07408	0.367
Congo république du	2010	8	1	12.6451	46.767	307873	10.3967	16.0823	-2.19674	0.688	0.575	1	8.4	17.4468	66.0818	36.9071	3.70585e+09	3705.85	40.013	5	0.495	3.24688	-1.45789	2.15657e+10	10.3338	-2.7351	90.7476	1.95784	462.693	0.0462693	-1.33471	12.5401	1.0983	0.36
Congo république du	2011	8	1	12.1717	47.3599	144356	10.4476	16.6268	-2.21299	0.684	0.559	1	8.4	17.1883	65.5679	36.8034	5.65162e+09	5651.62	40.544	5.6	0.498	3.35179	-1.45751	2.58397e+10	10.4123	-1.59602	85.1981	1.93043	484.205	0.0484205	-1.31497	13.0725	1.11636	0.354
Congo république du	2012	8	1	11.7015	47.9584	971848	10.4839	17.1843	-2.08589	0.684	0.521	1	8.94309	16.922	65.0449	36.6919	2.98052e+09	2980.52	41.082	6.1067	0.498	3.35666	-1.32971	2.93062e+10	10.467	-2.89161	68.3517	1.83475	460.754	0.0460754	-1.33653	13.6239	1.1343	0.328
Congo république du	2013	8	1	11.2346	48.5635	790226	10.5062	17.7552	-2.19219	0.67	0.525	1	8.94309	16.6477	64.5127	36.5725	2.64928e+09	2649.28	41.627	6.6	0.514	3.40914	-1.33808	3.26797e+10	10.5143	-1.69759	77.4659	1.88911	538.16	0.053816	-1.26909	13.8638	1.14188	0.325
Congo république du	2014	8	1	10.7708	49.1753	59896	10.5149	18.3394	-2.16792	0.686	0.531	1	10.6426	16.3655	63.9713	36.4457	2460000000	2460	42.18	7.11	0.514	3.44602	-1.32077	3.5909e+10	10.5552	-1.49957	78.6902	1.89592	622.852	0.0622852	-1.20562	14.2251	1.15306	0.328
Congo république du	2015	8	1	10.3105	49.7928	398327	10.5105	18.9369	-2.13885	0.691	0.502	1	8.94309	16.0754	63.4207	36.3108	2.94307e+09	2943.07	42.74	7.61597	0.514	3.38939	-1.31091	3.79177e+10	10.5788	-1.16572	59.3324	1.77329	464.344	0.0464344	-1.33316	14.3138	1.15575	0.319
Congo république du	2016	8	1	9.85369	50.417	1882	10.4936	19.5481	-2.22459	0.687	0.467	1	8.94309	15.7774	62.8609	36.1679	2.40234e+09	2402.34	43.307	8.12195	0.527	3.46603	-1.36657	3.71348e+10	10.5698	-0.932375	55.9252	1.74761	413.596	0.0413596	-1.38342	14.4117	1.15871	0.313
Congo république du	2017	8	1	9.40064	51.047	968876	10.4646	20.1729	-2.33944	0.657	0.493	1	8.94309	15.4715	62.2919	36.0163	2573750000	2573.75	43.88	8.65	0.531	3.44277	-1.44622	3.80193e+10	10.58	-1.04798	74.2914	1.87094	434.753	0.0434753	-1.36176	14.698	1.16726	0.314
Congo république du	2018	8	1	8.95128	51.6839	739826	10.4635	20.2686	-2.08052	0.655	0.509	1	8.94309	15.1577	61.7137	35.8565	2.71068e+09	2710.68	44.46	8.38598	0.549	3.27283	-1.51755	4.75682e+10	10.6773	-1.40756	69.9197	1.8446	444.57	0.044457	-1.35206	14.8184	1.1708	0.316
Congo république du	2019	8	1	8.50582	52.3266	501347	10.4623	20.3643	-1.62642	0.68	0.604	1	10	14.8359	61.1263	35.6879	3.07386e+09	3073.86	45.046	8.51799	0.553	3.18629	-1.55518	5.17758e+10	10.7141	-1.35099	55.2352	1.74222	443.118	0.0443118	-1.35348	14.9225	1.17384	0.349
Congo république du	2020	8	1	8.06433	52.9752	25335	10.4612	20.4597	-1.78669	0.71	0.6	1	12.8	14.5063	60.5297	35.5104	3.59577e+09	3595.77	45.638	24.8206	0.588	3.22448	-1.59227	4.8717e+10	10.6877	-1.49808	58.4918	1.76709	443.812	0.0443812	-1.3528	14.9511	1.17467	0.354
Congo république du	2021	8	1	7.98514	53.6302	638054	10.46	20.5548	-1.66062	0.702	0.557	1	12.8	14.1687	59.9239	35.3236	3.61019e+09	3610.19	46.235	32.7417	0.582	3.22253	-1.56907	5.53285e+10	10.7429	-1.67767	80.4813	1.9057	410.887	0.0410887	-1.38628	14.9525	1.17471	0.347
Congo république du	2022	8	1	7.90528	54.2912	184	4.19463	20.5073	-1.98449	0.68	0.568	1	12.8	13.8232	59.3089	35.1273	3.33024e+09	3330.24	46.837	36.2469	0.58	3.19784	-1.54447	6.58015e+10	10.8182	-1.58788	93.7287	1.97187	427.349	0.0427349	-1.36922	14.9518	1.17469	0.335
Inde	2000	9	5	1.36468	100	561419	4.22335	14.6639	-1.00121	0.888	0.794	1	9.00735	74.9218	91.4399	79.4919	1.88797e+09	1887.97	27.667	0.527532	0.682	1.82218	-0.403302	4.68396e+11	11.6706	-3.07468	26.9009	1.42977	3515.74	0.351574	-0.453983	60.869	1.7844	0.726
Inde	2001	9	5	1.32508	100	962451	4.22722	17.2207	-1.10594	0.888	0.794	1	8.83978	75.5985	91.6007	80.066	2.51245e+09	2512.45	27.918	0.660146	0.681	1.80845	-0.479342	4.8544e+11	11.6861	-4.07396	25.9933	1.41486	3467.08	0.346708	-0.460037	60.7048	1.78322	0.726
Inde	2002	9	5	1.28467	100	357549	4.23055	19.9646	-1.21066	0.888	0.802	1	8.92357	76.4115	91.8377	80.7685	2.41219e+09	2412.19	28.244	1.53788	0.681	1.77677	-0.555382	5.14939e+11	11.7118	-3.9479	29.5087	1.46995	3524.32	0.352432	-0.452924	60.7294	1.7834	0.73
Inde	2003	9	5	1.24456	100	755906	4.2333	22.7257	-1.51	0.894	0.797	1	8.83978	77.227	92.0749	81.4693	753500000	753.5	28.572	1.68649	0.681	1.72427	-0.456321	6.07701e+11	11.7837	-2.44414	30.5924	1.48561	3587.48	0.358748	-0.44521	60.6248	1.78265	0.736
Inde	2004	9	5	1.20473	100	157457	4.23555	25.5041	-1.28043	0.885	0.804	1	8.25688	78.0449	92.3124	82.1686	9.6769e+08	967.69	28.903	1.97614	0.68	1.67281	-0.448476	7.09153e+11	11.8507	-3.59219	37.5038	1.57408	3830.67	0.383067	-0.416726	60.6672	1.78295	0.73
Inde	2005	9	5	1.16523	100	562446	4.23726	28.2989	-1.01388	0.891	0.779	1	8.28729	78.8652	92.5501	82.866	2.18609e+09	2186.09	29.235	2.38807	0.68	1.60413	-0.363161	8.20384e+11	11.914	-4.62865	42.0017	1.62327	3991.22	0.399122	-0.398894	60.5834	1.78235	0.725
Inde	2006	9	5	1.12603	100	970787	4.23842	31.1103	-1.06518	0.895	0.777	1	8.25688	79.688	92.7881	83.5616	1.58423e+09	1584.23	29.569	2.8055	0.682	1.52431	-0.274563	9.4026e+11	11.9732	-5.99229	45.7245	1.66015	4141.06	0.414106	-0.382889	60.5094	1.78182	0.719
Inde	2007	9	5	1.08713	84.0739	382435	4.23903	33.9384	-1.1543	0.895	0.777	1	9.0573	80.5131	93.0264	84.2553	1.2696e+09	1269.6	29.906	3.95	0.685	1.46637	-0.39769	1.21674e+12	12.0852	-8.20163	45.6863	1.65979	4428.84	0.442884	-0.35371	60.4132	1.78113	0.719
Inde	2008	9	5	1.04854	84.7125	797429	4.23916	36.783	-1.10971	0.895	0.777	1	9.0573	81.3407	93.2649	84.9473	1.90279e+09	1902.79	30.246	4.38	0.682	1.42239	-0.339098	1.1989e+12	12.0788	-24.1497	53.3682	1.72728	4621.17	0.462117	-0.335248	60.4593	1.78146	0.719
Inde	2009	9	5	1.01028	85.3578	215974	4.23877	39.6432	-1.35555	0.882	0.79	1	9.0573	82.1707	93.5037	85.6371	2.0314e+09	2031.4	30.587	5.12	0.688	1.39119	-0.452406	1.34189e+12	12.1277	-19.4858	46.2729	1.66533	4896.74	0.489674	-0.310093	60.5639	1.78221	0.684
Inde	2010	9	5	0.972338	85.9995	6380205	4.23785	42.5191	-1.27798	0.889	0.795	1	10.8257	83.0031	93.7428	86.3249	2.80993e+09	2809.93	30.93	7.5	0.686	1.3776	-0.463755	1.67562e+12	12.2242	-11.4288	49.2552	1.69245	5038.9	0.50389	-0.297664	60.3974	1.78102	0.679
Inde	2011	9	5	0.934711	86.6378	63531	4.23618	45.4109	-1.3268	0.889	0.795	1	11.0092	83.838	93.9821	87.0107	3.11288e+09	3112.88	31.276	10.07	0.686	1.36159	-0.540836	1.82305e+12	12.2608	-23.8907	55.6239	1.74526	5241.94	0.524194	-0.280508	60.43	1.78125	0.679
Inde	2012	9	5	0.897322	87.2723	4919925	4.23377	48.3206	-1.28931	0.873	0.782	1	11.0092	84.6753	94.2217	87.6952	1.55326e+09	1553.26	31.634	11.1	0.683	1.33219	-0.513968	1.82764e+12	12.2619	-15.4424	55.7937	1.74659	5452.14	0.545214	-0.263433	60.4206	1.78119	0.676
Inde	2013	9	5	0.860196	87.9032	923662	4.23062	51.2473	-1.22917	0.868	0.786	1	11.0092	85.5149	94.4616	88.3781	2.45317e+09	2453.17	32.003	12.3	0.681	1.29755	-0.517086	1.85672e+12	12.2687	-26.3881	53.8441	1.73114	5560.02	0.556002	-0.254924	60.4395	1.78132	0.658
Inde	2014	9	5	0.823342	88.5304	3586626	4.22673	54.1906	-0.997912	0.813	0.78	1	11.418	86.357	94.7017	89.0594	3.00579e+09	3005.79	32.384	13.5	0.671	1.24036	-0.457155	2.03913e+12	12.3094	-22.8902	48.9222	1.68951	5862.71	0.586271	-0.231902	60.4496	1.78139	0.621
Inde	2015	9	5	0.786778	89.154	797185	4.22209	57.1496	-0.954774	0.666	0.757	1	11.9705	87.2016	94.9422	89.7387	3.6107e+09	3610.7	32.777	14.9	0.671	1.1878	-0.406171	2.10359e+12	12.323	-36.4952	41.9229	1.62245	5994.32	0.599432	-0.22226	60.4317	1.78126	0.552
Inde	2016	9	5	0.750522	89.7738	2394238	4.2167	60.1238	-0.960427	0.615	0.753	1	11.9705	88.0485	95.1828	90.4158	2.92903e+09	2929.03	33.182	16.5	0.67	1.18505	-0.336942	2.2948e+12	12.3607	-39.4113	40.0825	1.60295	6189.11	0.618911	-0.208372	60.3991	1.78103	0.533
Inde	2017	9	5	0.714585	90.3896	6855316	4.21058	63.1126	-0.774099	0.549	0.725	1	11.8081	88.8979	95.4238	91.0906	3.46341e+09	3463.41	33.6	18.2	0.668	1.15562	-0.291452	2.65147e+12	12.4235	-28.8759	40.7425	1.61005	6351.18	0.635118	-0.197146	60.2839	1.7802	0.491
Inde	2018	9	5	0.678993	91.0018	1357517	4.20374	66.1149	-0.997707	0.54	0.718	1	11.8081	89.7497	95.665	91.7627	2.55713e+09	2557.13	34.03	20.0813	0.681	1.08753	-0.229412	2.70293e+12	12.4318	-30.6997	43.617	1.63966	6638.48	0.663848	-0.177931	60.2436	1.77991	0.482
Inde	2019	9	5	0.643765	91.6107	5902755	4.19618	69.13	-0.796847	0.514	0.678	1	14.3911	90.6039	95.9064	92.4318	2.62719e+09	2627.19	34.472	29.5235	0.636	1.02531	-0.302205	2.83561e+12	12.4526	-37.4699	39.9054	1.60103	6736.51	0.673651	-0.171565	60.2198	1.77974	0.433
Inde	2020	9	5	0.608917	92.2161	49293	4.1879	72.0482	-0.841419	0.441	0.662	1	14.3646	91.4605	96.1482	93.0977	1.84288e+09	1842.88	34.926	43.4054	0.668	0.955221	-0.292916	2.67485e+12	12.4273	-53.2397	37.7581	1.57701	6322.3	0.63223	-0.199125	60.0459	1.77848	0.394
Inde	2021	9	5	0.574464	92.818	5129828	4.17892	74.9329	-0.691077	0.462	0.662	1	14.4444	92.3196	96.3902	93.7603	3.13531e+09	3135.31	35.393	36.4644	0.679	0.797216	-0.316494	3.16727e+12	12.5007	-27.4885	45.4231	1.65728	6809.69	0.680969	-0.166872	60.0459	1.77848	0.398
Inde	2022	9	5	0.54043	93.416	9815592	0.336834	77.8162	-0.615027	0.447	0.627	1	14.9446	93.181	96.6325	94.4191	3.42717e+09	3427.17	35.872	39.9349	0.661	0.680373	-0.321811	3.35347e+12	12.5255	-35.408	49.9653	1.69867	7129.11	0.712911	-0.146965	60.0459	1.77848	0.385
Cambodge	2000	10	5	24.9395	80.3468	160616	0.323351	10.4473	-0.776031	0.461	0.586	1	7.37705	45.7746	80.928	52.3082	5.1127e+08	511.27	18.586	0.0470226	0.557	1.59017	-0.967183	3.65403e+09	9.56277	-0.141911	111.61	2.0477	739.456	0.0739455	-1.13109	27.0224	1.43172	0.323
Cambodge	2001	10	5	24.1527	80.9623	238852	0.350317	10.7958	-0.749098	0.462	0.586	1	7.37705	47.5991	81.7223	53.9812	5.5249e+08	552.49	18.703	0.0769561	0.557	1.56167	-0.978983	3.984e+09	9.60032	-0.142109	114.141	2.05744	769.41	0.076941	-1.11384	27.7022	1.44251	0.322
Cambodge	2002	10	5	23.3668	81.5792	31835	0.296385	13.5213	-0.722165	0.462	0.586	1	7.37705	49.2771	82.3988	55.5106	6.0957e+08	609.57	18.82	0.226983	0.551	1.54239	-0.990784	4.28403e+09	9.63185	-0.13908	119.693	2.07807	754.145	0.0754145	-1.12255	28.3254	1.45218	0.32
Cambodge	2003	10	5	22.5817	81.6468	399113	0.404248	16.4958	-0.652009	0.462	0.585	1	9.7561	50.8259	82.9935	56.9175	5.7494e+08	574.94	18.937	0.26057	0.56	1.51107	-0.989836	4.65825e+09	9.66822	-0.0743197	123.081	2.09019	803.816	0.0803816	-1.09484	28.8919	1.46078	0.325
Cambodge	2004	10	5	21.7974	81.716	480993	0.188523	19.4886	-0.407748	0.442	0.585	1	9.7561	52.3554	83.5843	58.3061	4.9788e+08	497.88	19.055	0.300437	0.56	1.47375	-1.05835	5.33783e+09	9.72737	-0.121173	134.511	2.12876	813.564	0.0813564	-1.08961	29.6284	1.47171	0.324
Cambodge	2005	10	5	21.0138	81.787	56401	0.619973	22.4997	-0.393915	0.442	0.585	1	9.7561	53.8658	84.1714	59.6766	5.4121e+08	541.21	19.174	0.317322	0.546	1.45761	-1.22374	6.29305e+09	9.79886	-0.374902	136.832	2.13619	909.821	0.0909821	-1.04104	30.3422	1.48205	0.32
Cambodge	2006	10	5	20.231	51.8999	64831	1.0771	25.5285	-0.345979	0.442	0.585	1	9.7561	55.3568	84.7547	61.0285	5.5936e+08	559.36	19.293	0.468357	0.546	1.47594	-1.26039	7.2746e+09	9.86181	-0.474828	144.614	2.16021	967.996	0.0967996	-1.01413	30.3365	1.48197	0.32
Cambodge	2007	10	5	19.449	53.6084	733759	1.55981	28.5753	-0.363606	0.442	0.572	1	19.5122	56.8286	85.3342	62.3624	6.4192e+08	641.92	19.413	0.49	0.546	1.47554	-1.15169	8.63924e+09	9.93648	-0.866193	138.268	2.14072	1116.15	0.111615	-0.952276	30.3365	1.48197	0.319
Cambodge	2008	10	5	18.6625	55.3148	8157215	2.0677	31.657	-0.298691	0.436	0.564	1	16.2602	58.2812	85.9099	63.6884	6.0469e+08	604.69	19.571	0.51	0.579	1.51791	-1.24171	1.03519e+10	10.015	-0.794691	133.32	2.1249	1152.2	0.11522	-0.938472	30.3365	1.48197	0.313
Cambodge	2009	10	5	17.8496	57.0191	8751335	2.59861	34.8431	-0.560374	0.435	0.554	1	17.8862	59.7145	86.4818	65.0493	6.4056e+08	640.56	19.93	0.53	0.597	1.57666	-1.18124	1.04019e+10	10.0171	-0.90952	105.138	2.02176	1399.93	0.139993	-0.853893	30.3365	1.48197	0.311
Cambodge	2010	10	5	17.0387	58.7216	937849	3.15331	38.0399	-0.500984	0.432	0.54	1	21.1382	61.1286	87.05	66.3891	7.0095e+08	700.95	20.294	1.26	0.603	1.55622	-1.24901	1.12423e+10	10.0509	-1.38374	113.604	2.05539	1591.32	0.159132	-0.798243	30.6084	1.48584	0.31
Cambodge	2011	10	5	16.2298	60.4222	3949	3.7315	41.2469	-0.30442	0.432	0.54	1	20.3252	62.5235	87.6143	67.708	6.6365e+08	663.65	20.663	3.1	0.584	1.51839	-1.25565	1.28295e+10	10.1082	-1.50972	113.582	2.05531	1623.92	0.162392	-0.789436	30.8786	1.48966	0.31
Cambodge	2012	10	5	15.423	62.1207	73517	4.33286	44.4636	-0.103577	0.422	0.538	1	20.3252	63.8991	88.1749	69.006	783000000	783	21.037	4.94	0.597	1.49998	-1.08068	1.40544e+10	10.1478	-1.95192	120.597	2.08134	1783.72	0.178372	-0.748673	31.3413	1.49612	0.305
Cambodge	2013	10	5	14.6185	63.8173	146731	4.95709	47.6891	-0.136436	0.387	0.503	1	20.3252	65.2554	88.7317	70.2829	8.077e+08	807.7	21.415	6	0.606	1.4951	-1.06372	1.5228e+10	10.1826	-2.0062	130.046	2.1141	1866.12	0.186612	-0.729061	31.5665	1.49923	0.294
Cambodge	2014	10	5	13.816	65.5218	223472	5.6038	50.9237	0.0231748	0.366	0.498	1	20.3252	66.5926	89.2847	71.5392	8.1242e+08	812.42	21.799	14	0.588	1.48244	-1.14675	1.67026e+10	10.2228	-1.77141	129.612	2.11265	2031.75	0.203175	-0.69213	31.7351	1.50154	0.296
Cambodge	2015	10	5	13.0158	67.2753	303919	6.27267	54.1665	0.0633481	0.36	0.498	1	20.3252	67.9104	89.8339	72.7748	7.6918e+08	769.18	22.188	6.43319	0.587	1.46024	-1.15312	1.805e+10	10.2565	-1.73504	127.864	2.10675	2299.25	0.229925	-0.638414	31.9943	1.50507	0.294
Cambodge	2016	10	5	12.2179	69.0235	388155	6.96336	57.417	0.206191	0.322	0.468	1	20.3252	69.2091	90.3793	73.9897	8.117e+08	811.7	22.582	32.3985	0.564	1.45861	-1.30133	2.00167e+10	10.3014	-2.39684	126.95	2.10363	2828.74	0.282874	-0.548406	32.2931	1.50911	0.277
Cambodge	2017	10	5	11.4225	70.7662	47634	7.67554	60.6744	0.0935097	0.225	0.278	1	20.3252	70.4884	90.9209	75.1838	9.3371e+08	933.71	22.98	32.9003	0.57	1.38177	-1.31736	2.21772e+10	10.3459	-2.67323	124.788	2.09617	2950.3	0.29503	-0.530134	32.7676	1.51544	0.237
Cambodge	2018	10	5	10.6289	72.5035	568112	8.40859	63.9398	0.110922	0.191	0.24	1	20	71.7486	91.4588	76.3584	827750000	827.75	23.388	32.6494	0.574	1.24368	-1.3568	2.45718e+10	10.3904	-3.08867	124.899	2.09656	3674.93	0.367493	-0.434751	33.1741	1.5208	0.214
Cambodge	2019	10	5	9.83748	74.2348	6636877	9.16211	67.2122	-0.0754886	0.176	0.213	1	20	72.9895	91.9928	77.5132	1.04329e+09	1043.29	23.805	52.3059	0.585	1.26258	-1.32317	2.70894e+10	10.4328	-3.5612	123.557	2.09187	4069.46	0.406946	-0.390463	33.7108	1.52777	0.196
Cambodge	2020	10	5	9.04814	75.9605	7631598	9.93559	70.491	-0.209066	0.171	0.195	1	20	74.2111	92.5231	78.6485	1.43687e+09	1436.87	24.232	53.6508	0.589	1.47063	-1.27112	2.58728e+10	10.4128	-3.49763	123.991	2.09339	3918.64	0.391864	-0.406865	34.2476	1.53463	0.194
Cambodge	2021	10	5	8.26006	77.6803	9502442	10.7236	73.7752	-0.131522	0.181	0.194	1	21.6	75.4135	93.0496	79.764	1.36705e+09	1367.05	24.668	55.6004	0.577	1.47678	-1.19749	2.69611e+10	10.4307	-3.39104	129.111	2.11096	4035.08	0.403508	-0.394148	34.5521	1.53847	0.196
Cambodge	2022	10	5	7.27725	79.3939	1757224	11.5405	77.0641	-0.098023	0.2	0.222	1	20.8	76.5967	93.5723	80.86	1.68555e+09	1685.55	25.114	56.7328	0.555	1.33089	-1.2415	2.95048e+10	10.4699	-3.42835	123.187	2.09057	3976.86	0.397686	-0.40046	34.3999	1.53656	0.205
Cameroun	2000	11	1	10.402	81.1012	728514	6.55924	37.5662	-0.564016	0.678	0.61	1	5.55556	33.3805	82.6556	55.8214	6.1722e+08	617.22	45.542	0.25212	0.662	2.63276	-1.32529	1.05666e+10	10.0239	-0.149498	47.9279	1.68059	1575.58	0.157558	-0.802561	19.3776	1.2873	0.307
Cameroun	2001	11	1	10.0645	82.803	989555	6.87954	37.78	-0.62064	0.678	0.61	1	5.55556	34.443	82.6118	56.6676	7.8623e+08	786.23	46.139	0.277051	0.687	2.62643	-1.2672	1.09535e+10	10.0396	-0.0381085	51.5723	1.71242	1529.81	0.152981	-0.815363	19.3776	1.2873	0.307
Cameroun	2002	11	1	9.73195	84.4988	256498	7.20453	37.9947	-0.677265	0.678	0.609	1	5.55556	35.495	82.5671	57.4956	9.917e+08	991.7	46.738	0.360872	0.707	2.68125	-1.20911	1.24173e+10	10.094	-0.637873	48.4817	1.68558	1467.47	0.146747	-0.83343	19.3776	1.2873	0.312
Cameroun	2003	11	1	9.40467	86.1887	529667	7.53409	38.3633	-0.429471	0.678	0.608	1	8.88889	36.5365	82.5213	58.3048	1.20298e+09	1202.98	47.338	0.587623	0.707	2.72747	-0.981341	1.59703e+10	10.2033	-0.328517	40.2432	1.60469	1529.66	0.152966	-0.815404	19.3776	1.2873	0.317
Cameroun	2004	11	1	9.08247	87.7897	808796	7.86809	38.7368	-0.359356	0.678	0.608	1	8.88889	37.5675	82.4744	59.0959	9.6854e+08	968.54	47.94	0.976075	0.707	2.74742	-1.12544	1.88262e+10	10.2748	-0.0767155	41.8377	1.62157	1551.4	0.15514	-0.809276	19.4834	1.28966	0.318
Cameroun	2005	11	1	8.76584	89.547	94767	8.2064	39.1141	-0.182025	0.682	0.606	1	8.88889	38.5879	82.4266	59.8676	5.0914e+08	509.14	48.541	1.40265	0.707	2.75574	-1.19941	1.95099e+10	10.2903	-0.257278	44.9977	1.65319	1456.9	0.14569	-0.836571	19.4898	1.28981	0.317
Cameroun	2006	11	1	8.45448	62.8695	387001	8.5489	39.496	-0.244705	0.682	0.606	1	8.88889	39.5979	82.3777	60.6212	2.02071e+09	2020.71	49.143	2.02874	0.702	2.74855	-1.09146	2.09105e+10	10.3204	-0.0644341	47.1044	1.67306	1606.58	0.160658	-0.794097	19.4898	1.28981	0.317
Cameroun	2007	11	1	8.14839	63.946	68552	8.89547	39.8824	-0.326109	0.683	0.594	1	13.8889	40.5973	82.3278	61.3565	2.01334e+09	2013.34	49.746	2.93	0.734	2.80628	-1.03304	2.39283e+10	10.3789	-0.197297	53.2157	1.72604	1647.38	0.164738	-0.783206	19.4898	1.28981	0.319
Cameroun	2008	11	1	7.8476	65.0115	990341	9.24598	40.2735	-0.552111	0.693	0.578	1	13.8889	41.5862	82.2768	62.0739	5.2511e+08	525.11	50.35	3.4	0.728	2.86258	-1.03423	2.77151e+10	10.4427	-0.0232108	56.9244	1.7553	1625.48	0.162548	-0.789019	19.5955	1.29216	0.317
Cameroun	2009	11	1	7.55224	66.0657	301737	9.6003	40.6687	-0.474782	0.693	0.578	1	13.8889	42.5646	82.2248	62.7731	6.276e+08	627.6	50.954	3.84	0.728	2.86539	-1.02055	2.7933e+10	10.4461	-0.812346	42.1761	1.62507	1695.75	0.169575	-0.770638	19.7013	1.29449	0.317
Cameroun	2010	11	1	7.26219	67.1087	619457	9.9583	41.0686	-0.736971	0.691	0.578	1	13.8889	43.5325	82.1718	63.4545	5.6317e+08	563.17	51.559	4.3	0.75	2.85766	-1.07532	2.75075e+10	10.4395	-0.0352854	47.2386	1.6743	1886.15	0.188615	-0.724424	20.52	1.31218	0.322
Cameroun	2011	11	1	6.97759	68.1394	943768	10.3199	41.4729	-0.661688	0.686	0.576	1	13.8889	44.4898	82.1177	64.1181	6.0493e+08	604.93	52.164	5	0.745	2.82842	-1.16693	3.06309e+10	10.4862	-0.466172	51.522	1.71199	1931.21	0.193121	-0.71417	20.6258	1.31441	0.322
Cameroun	2012	11	1	6.69843	69.1585	274666	10.6849	41.8814	-0.588517	0.703	0.535	1	13.8889	45.4367	82.0627	64.7638	6.2165e+08	621.65	52.769	7.5	0.752	2.81305	-1.27244	3.01551e+10	10.4794	-0.809676	50.036	1.69928	1873.38	0.187338	-0.727373	20.6258	1.31441	0.326
Cameroun	2013	11	1	6.42484	70.1661	612396	11.0532	42.2939	-0.532237	0.682	0.51	1	31.1111	46.373	82.0065	65.3917	7.6039e+08	760.39	53.373	10	0.79	2.80909	-1.21758	3.37286e+10	10.528	-0.704967	49.6745	1.69613	1600.3	0.16003	-0.7958	20.6258	1.31441	0.321
Cameroun	2014	11	1	6.1568	71.1621	956944	11.4247	42.7104	-1.05925	0.682	0.503	1	31.1111	47.2988	81.9494	66.0018	8.581e+08	858.1	53.976	16.2149	0.788	3.02592	-1.17845	3.63865e+10	10.5609	-0.737642	50.8324	1.70614	1941.54	0.194154	-0.711853	20.6258	1.31441	0.33
Cameroun	2015	11	1	5.8943	72.146	308287	11.7994	43.1309	-0.989914	0.682	0.493	1	31.1111	48.2141	81.8912	66.5944	7.5927e+08	759.27	54.578	18.3	0.79	3.13934	-1.09618	3.22102e+10	10.508	-0.638519	45.5401	1.65839	1888.39	0.188839	-0.723908	20.6258	1.31441	0.327
Cameroun	2016	11	1	5.63732	73.1184	666411	12.1769	43.5553	-1.06121	0.595	0.464	1	31.1111	49.1189	81.832	67.1697	8.6431e+08	864.31	55.179	20.6	0.77	2.98933	-1.17888	3.38143e+10	10.5291	-0.702818	40.6386	1.60894	1785.73	0.178573	-0.748184	20.6258	1.31441	0.311
Cameroun	2017	11	1	5.38606	74.0786	31737	12.5574	43.9831	-1.09151	0.575	0.455	1	31.1111	50.0132	81.7718	67.7272	1.35856e+09	1358.56	55.777	23.203	0.752	2.835	-1.22561	3.60985e+10	10.5575	-0.792576	39.199	1.59328	1763.44	0.176344	-0.753639	20.6258	1.31441	0.302
Cameroun	2018	11	1	5.14027	75.0269	403796	12.9406	44.4149	-1.4018	0.58	0.48	1	31.1111	50.897	81.7105	68.2678	1.24458e+09	1244.58	56.374	29.7	0.749	2.77031	-1.16267	3.99556e+10	10.6016	-0.657154	40.5876	1.60839	1746.75	0.174675	-0.757768	20.6258	1.31441	0.296
Cameroun	2019	11	1	4.90013	75.9628	782982	13.3264	44.8499	-1.56182	0.591	0.479	1	31.1111	51.7702	81.6482	68.7911	1.41892e+09	1418.92	56.968	36.5392	0.759	2.78164	-1.21871	3.96678e+10	10.5984	-0.898871	43.3785	1.63727	1720.25	0.172025	-0.764409	20.6258	1.31441	0.287
Cameroun	2020	11	1	4.66551	76.8863	169041	13.7148	45.2885	-1.51368	0.581	0.462	1	33.8889	52.6329	81.5848	69.2976	1.48368e+09	1483.68	57.56	41.2264	0.777	2.72449	-1.14035	4.07732e+10	10.6104	-0.590772	33.7388	1.52813	1758.12	0.175812	-0.754951	20.6258	1.31441	0.291
Cameroun	2021	11	1	4.43655	77.7974	56234	14.1055	45.73	-1.39409	0.59	0.458	1	33.8889	53.4852	81.5205	69.7871	1.14096e+09	1140.96	58.148	42.5456	0.79	2.65496	-1.11718	4.49935e+10	10.6531	-0.90871	36.7459	1.56521	1593.62	0.159362	-0.797615	20.6258	1.31441	0.292
Cameroun	2022	11	1	4.21311	78.6963	962616	14.2317	46.1747	-1.37963	0.594	0.452	1	33.8889	54.3269	81.4551	70.2601	1.22892e+09	1228.92	58.733	43.8629	0.79	2.62905	-1.12793	4.36441e+10	10.6399	-0.898335	41.2869	1.61581	1675.87	0.167587	-0.77576	20.6258	1.31441	0.299
Chili	2000	12	4	86.4231	94.15	2508793	0.43762	93.0316	0.485464	0.941	0.919	1	10.8333	78.4098	99	96.3392	7.467e+07	74.67	86.073	16.6	0.83	1.14904	1.54022	7.83398e+10	10.894	-0.873371	58.7119	1.76873	20023.1	2.00231	0.301532	20.3219	1.30796	0.879
Chili	2001	12	4	94.15	94.15	9371088	0.43762	93.4409	0.78713	0.941	0.919	1	10.8333	79.0429	99	96.5072	8.754e+07	87.54	86.363	19.1	0.836	1.11531	1.50969	7.15747e+10	10.8548	-2.59003	62.1448	1.7934	20184.6	2.01846	0.30502	20.3757	1.30911	0.879
Chili	2002	12	4	94.15	94.15	641538	0.43762	93.8325	1.0888	0.942	0.916	1	10.8333	79.6761	99	96.6626	1.735e+07	17.35	86.606	22.1	0.847	1.08793	1.47917	7.0264e+10	10.8467	-2.20677	62.4839	1.79577	20441.3	2.04413	0.310508	20.9339	1.32085	0.878
Chili	2003	12	4	94.15	94.15	3893132	0.43762	94.1787	0.761612	0.942	0.916	1	12.5	80.3093	99	96.78	1.086e+08	108.6	86.665	25.4738	0.847	1.04791	1.1671	7.64926e+10	10.8836	-1.66625	65.6934	1.81752	20334.7	2.03347	0.308237	20.7456	1.31693	0.878
Chili	2004	12	4	94.15	94.15	138577	0.43762	94.5236	0.691342	0.942	0.916	1	12.5	80.9424	99	96.8969	7.743e+07	77.43	86.725	28.1779	0.847	0.996674	1.30586	9.9076e+10	10.996	-3.01765	69.8894	1.84441	21494.6	2.14946	0.332328	21.4315	1.33105	0.878
Chili	2005	12	4	94.15	94.15	889881	0.43762	94.8666	0.842384	0.939	0.916	1	15	81.5756	99	97.0127	2.0547e+08	205.47	86.783	31.1753	0.856	0.97751	1.41653	1.22294e+11	11.0874	-3.99343	72.0625	1.85771	22090.9	2.20909	0.344213	21.3642	1.32969	0.876
Chili	2006	12	4	94.9496	95.7491	6426778	0.43762	95.2085	0.613006	0.944	0.921	1	15	82.2087	99	97.128	1.1569e+08	115.69	86.842	34.4978	0.856	0.979796	1.41256	1.53844e+11	11.1871	-2.72825	73.7116	1.86754	22631.9	2.26319	0.354721	21.2499	1.32736	0.89
Chili	2007	12	4	95.906	96.0629	3972845	0.43762	95.5487	0.406371	0.944	0.921	1	15	82.8419	99	97.2423	1.1272e+08	112.72	86.9	35.9	0.856	0.980589	1.34515	1.72491e+11	11.2368	-6.18406	76.977	1.88636	22387.8	2.23878	0.350011	21.1585	1.32548	0.89
Chili	2008	12	4	96.2107	96.3585	1534142	0.43762	95.8877	0.431913	0.944	0.921	1	15	83.475	99	97.3562	1.003e+08	100.3	86.959	37.3	0.856	1.00085	1.31799	1.79895e+11	11.255	-10.3491	80.6766	1.90675	22165.3	2.21653	0.345673	20.6655	1.31525	0.89
Chili	2009	12	4	96.4846	96.6107	9113271	0.43762	96.225	0.602584	0.94	0.918	1	15	84.1082	99	97.4691	7.749e+07	77.49	87.017	41.56	0.853	1.02694	1.32123	1.71778e+11	11.235	-6.94461	66.686	1.82403	21051.7	2.10517	0.323287	20.1726	1.30476	0.892
Chili	2010	12	4	96.7361	96.8614	6709884	0.43762	96.5609	0.679605	0.936	0.921	1	14.1667	84.7414	99	97.5812	1.8897e+08	188.97	87.074	45	0.854	1.00903	1.44163	2.17051e+11	11.3366	-6.28854	69.7177	1.84334	21403.4	2.14034	0.330484	19.6783	1.29399	0.89
Chili	2011	12	4	96.9858	97.1101	4321802	0.43762	96.8954	0.452553	0.941	0.92	1	14.1667	85.3745	99	97.6928	1.6088e+08	160.88	87.132	52.2496	0.854	0.991361	1.47659	2.51383e+11	11.4003	-9.47785	72.4816	1.86023	22459.6	2.24596	0.351402	19.1853	1.28297	0.891
Chili	2012	12	4	97.2337	97.3573	1950856	0.43762	97.2285	0.331102	0.945	0.92	1	14.1667	86.0077	99	97.8035	1.2644e+08	126.44	87.189	55.05	0.854	0.974635	1.54359	2.67025e+11	11.4266	-11.867	68.1561	1.83351	23224.1	2.32241	0.365938	18.6924	1.27166	0.894
Chili	2013	12	4	97.48	97.6027	9596119	0.43762	97.5601	0.363743	0.953	0.913	1	15.8333	86.6408	99	97.9135	7.985e+07	79.85	87.246	58	0.864	0.964976	1.49896	2.77395e+11	11.4431	-11.7978	65.1433	1.81387	23630	2.363	0.373463	18.1994	1.26006	0.897
Chili	2014	12	4	97.7247	97.8466	72575176	0.43762	97.8904	0.447517	0.954	0.917	1	15.8333	87.274	99	98.0229	2.4868e+08	248.68	87.303	61.11	0.879	1.00681	1.44106	2.59561e+11	11.4142	-15.448	65.6346	1.81713	23154.4	2.31544	0.364633	17.7065	1.24813	0.892
Chili	2015	12	4	97.9676	98.0887	49350712	0.43762	98.2192	0.424872	0.941	0.919	1	15.8333	87.9071	99	98.1315	6.179e+07	61.79	87.36	76.6296	0.865	1.02943	1.18317	2.4245e+11	11.3846	-1.91515	59.3491	1.77341	23180	2.318	0.365114	17.2122	1.23584	0.892
Chili	2016	12	4	98.2088	98.329	2628133	0.43762	98.547	0.402406	0.941	0.919	1	15.8333	88.5403	99	98.24	2.0978e+08	209.78	87.422	83.5586	0.85	1.18906	1.02332	2.49345e+11	11.3968	-3.48698	56.0579	1.74864	23993.9	2.39939	0.380101	16.7192	1.22322	0.892
Chili	2017	12	4	98.4484	98.5678	34554046	0.43762	98.8734	0.406282	0.946	0.919	1	15.8333	89.1735	99	98.3484	7.915e+07	79.15	87.49	82.3275	0.867	1.56206	1.00148	2.76154e+11	11.4412	-2.70225	56.0262	1.74839	24517.2	2.45172	0.389472	16.2263	1.21022	0.895
Chili	2018	12	4	98.6864	98.8049	1.36734e+06	0.43762	99	0.41277	0.925	0.907	1	22.5806	89.8066	99	98.4565	1.44465e+08	144.465	87.564	84.9	0.864	1.79596	0.958149	2.95858e+11	11.4711	-6.09603	58.1771	1.76475	25039.6	2.50396	0.398628	15.7333	1.19682	0.873
Chili	2019	12	4	98.9227	99.0404	1.79607e+07	0.43762	99	-0.0161216	0.868	0.884	1	22.5806	90.4398	99	98.5642	1.11808e+08	111.808	87.643	85.0176	0.858	1.79139	0.979157	2.78285e+11	11.4445	-3.23401	57.6118	1.76051	24894.5	2.48945	0.396104	15.239	1.18296	0.831
Chili	2020	12	4	99.1573	99.2742	9.66402e+06	0.43762	99	0.0440445	0.893	0.869	1	22.5806	91.0729	99	98.6714	1.28136e+08	128.136	87.727	87.4593	0.874	1.36064	1.10673	2.54042e+11	11.4049	-5.04911	58.1829	1.7648	22925.9	2.29259	0.360327	14.7461	1.16868	0.833
Chili	2021	12	4	99.3904	99.5065	1.38124e+07	0.43762	99	0.161427	0.901	0.873	1	35.4839	91.7061	99	98.778	1.19972e+08	119.972	87.817	88.8045	0.868	0.994345	0.956733	3.15515e+11	11.499	-0.603863	64.8384	1.81183	24462.8	2.44628	0.388505	14.2503	1.15382	0.842
Chili	2022	12	4	99.6218	99.7372	17036774	0.385243	99	0.132084	0.917	0.865	1	35.4839	92.3392	99	98.8839	1.24054e+08	124.054	87.912	90.6769	0.906	0.565514	0.96828	3.02117e+11	11.4802	-5.03031	74.9878	1.87499	25684.2	2.56841	0.409665	14.4982	1.16131	0.835
Chine	2000	13	5	2.58076	99.9655	1387	0.383582	56.8201	-0.209917	0.233	0.065	1	21.7828	70.7251	98.2313	80.5935	2.29148e+09	2291.48	35.877	1.77591	0.606	0.787957	-0.208549	1.21133e+12	12.0833	-37.4833	39.411	1.59562	9334.94	0.933494	-0.0298887	55.6946	1.74581	0.101
Chine	2001	13	5	2.53856	100	82114	0.386905	57.5685	-0.268772	0.234	0.065	1	21.7828	70.7251	98.2313	80.928	2.08124e+09	2081.24	37.093	2.63965	0.606	0.726381	-0.383223	1.3394e+12	12.1269	-37.357	38.5272	1.58577	9797.81	0.979781	-0.0088709	55.7579	1.74631	0.101
Chine	2002	13	5	2.49234	100	62999	0.43762	59.7191	-0.327627	0.244	0.068	1	21.7828	71.6775	98.1903	81.8651	1.99777e+09	1997.77	38.425	4.5957	0.607	0.67	-0.557898	1.47056e+12	12.1675	-46.7896	42.7472	1.63091	10602.1	1.06021	0.0253914	55.8211	1.7468	0.101
Chine	2003	13	5	2.44546	100	4699745	0.487643	61.8436	-0.565358	0.244	0.068	1	20.2345	72.6276	98.1494	82.7792	1.60802e+09	1608.02	39.776	6.2	0.611	0.622861	-0.395265	1.66028e+12	12.2202	-49.4449	51.8042	1.71437	12273.3	1.22733	0.0889621	55.8844	1.74729	0.103
Chine	2004	13	5	2.39799	100	342306	0.536798	63.9406	-0.390681	0.249	0.068	1	20.2345	73.5754	98.1084	83.6693	1.84987e+09	1849.87	41.144	7.3	0.605	0.593933	-0.565062	1.95535e+12	12.2912	-60.1447	59.5055	1.77456	14272.7	1.42727	0.154508	55.9476	1.74778	0.103
Chine	2005	13	5	2.21353	100	385759	0.584918	66.0074	-0.501757	0.183	0.062	1	20.2685	74.5209	98.0674	84.5334	1.93352e+09	1933.52	42.522	8.52326	0.632	0.588125	-0.617888	2.28596e+12	12.3591	-90.3791	62.208	1.79385	16114.2	1.61142	0.207208	56.0109	1.74827	0.094
Chine	2006	13	5	2.03657	79.2805	465854	0.631942	68.0323	-0.54003	0.183	0.062	1	20.2685	75.4641	98.0265	85.3618	1.41915e+09	1419.15	43.868	10.5232	0.632	0.558374	-0.518888	2.75212e+12	12.4397	-100.15	64.4792	1.80942	17552.8	1.75528	0.244346	56.0742	1.74876	0.094
Chine	2007	13	5	1.86062	79.6403	584157	0.677796	70.021	-0.500554	0.186	0.062	1	20.621	76.405	97.9855	86.1592	1.80821e+09	1808.21	45.199	16	0.645	0.522272	-0.599235	3.55033e+12	12.5503	-139.095	62.1936	1.79375	18955.2	1.89552	0.277729	56.1374	1.74925	0.094
Chine	2008	13	5	1.69043	80.8777	730441	0.722297	71.9796	-0.493088	0.185	0.065	1	21.3257	77.3436	97.9444	86.931	1.75604e+09	1756.04	46.539	22.6	0.647	0.512387	-0.526308	4.59434e+12	12.6622	-114.792	57.6123	1.76052	19561.8	1.95618	0.291409	56.2007	1.74974	0.094
Chine	2009	13	5	1.52624	82.0846	906351	0.765341	73.9061	-0.451781	0.183	0.065	1	20.9734	78.2799	97.9034	87.6757	1.50798e+09	1507.98	47.88	28.9	0.646	0.497381	-0.519457	5.10169e+12	12.7077	-87.1671	45.185	1.65499	20281.1	2.02811	0.307091	56.2639	1.75023	0.094
Chine	2010	13	5	1.36798	83.2597	111282	0.806774	75.801	-0.657061	0.182	0.064	1	21.3257	79.2139	97.8624	88.3938	7.6209e+08	762.09	49.226	34.3	0.642	0.48296	-0.57001	6.08719e+12	12.7844	-185.75	50.7171	1.70515	21551.5	2.15515	0.333478	56.1835	1.74961	0.094
Chine	2011	13	5	1.21691	84.4007	354886	0.846991	77.6513	-0.602055	0.18	0.064	1	21.323	80.1456	97.8213	89.0738	-5.2258e+08	-522.58	50.511	38.3	0.639	0.546458	-0.514728	7.55155e+12	12.878	-231.652	50.7409	1.70536	23090.9	2.30909	0.363441	56.1037	1.74899	0.094
Chine	2012	13	5	1.07213	85.4976	631157	0.885818	79.4647	-0.538782	0.181	0.061	1	21.323	81.075	97.7803	89.7225	6.063e+07	60.63	51.765	42.3001	0.637	0.678345	-0.438276	8.53219e+12	12.9311	-176.25	48.2675	1.68366	23873.2	2.38732	0.377911	56.0235	1.74837	0.094
Chine	2013	13	5	0.933074	86.5552	9360256	0.922992	81.2468	-0.54379	0.133	0.051	1	23.4014	82.0021	97.7392	90.3448	-6.0976e+08	-609.76	53.013	45.8	0.631	0.666073	-0.35579	9.57047e+12	12.9809	-217.958	46.7444	1.66973	24600.4	2.46004	0.390941	55.9434	1.74775	0.087
Chine	2014	13	5	0.799656	87.5791	2688484	0.958376	82.9985	-0.522584	0.119	0.051	1	23.4014	82.9268	97.6981	90.9416	-9.4726e+08	-947.26	54.259	47.9	0.633	0.630326	-0.337421	1.04756e+13	13.0202	-144.968	44.9052	1.6523	25071.7	2.50717	0.399184	55.8633	1.74713	0.084
Chine	2015	13	5	0.67189	88.5674	6298633	0.991904	84.7193	-0.55256	0.102	0.045	1	23.6228	83.8493	97.657	91.5126	-3.0026e+08	-300.26	55.5	50.3	0.635	0.581456	-0.299674	1.10616e+13	13.0438	-68.0986	39.4642	1.5962	25210.3	2.52103	0.401578	55.7831	1.7465	0.081
Chine	2016	13	5	0.549742	89.5207	188937	1.02348	86.4095	-0.502221	0.089	0.042	1	23.6228	84.7695	97.6159	92.058	-7.3886e+08	-738.86	56.736	53.2	0.63	0.573051	-0.267868	1.12333e+13	13.0505	41.6749	36.8944	1.56696	25164.4	2.51644	0.400787	55.703	1.74588	0.08
Chine	2017	13	5	0.433216	90.4282	436321	1.05314	88.0683	-0.232558	0.072	0.046	1	24.2476	85.6873	97.5748	92.5773	-1.00674e+09	-1006.74	57.96	54.3	0.637	0.605245	-0.291191	1.23105e+13	13.0903	-27.791	37.6324	1.57556	25987.4	2.59874	0.414763	55.6229	1.74525	0.078
Chine	2018	13	5	0.32229	91.2967	8830574	1.08115	89.6942	-0.298572	0.062	0.046	1	24.8993	86.6029	97.5337	93.0687	-6.9708e+08	-697.08	59.152	59.2	0.626	0.467672	-0.286588	1.38949e+13	13.1429	-92.3385	37.5658	1.57479	27105	2.7105	0.433049	55.5427	1.74463	0.077
Chine	2019	13	5	0.216749	92.1309	3582454	1.10763	91.2881	-0.259781	0.053	0.042	1	24.9412	87.5162	97.4925	93.5327	-5.6768e+08	-567.68	60.308	64.0809	0.617	0.354741	-0.312405	1.428e+13	13.1547	-50.2598	35.8901	1.55497	28264.7	2.82647	0.451244	55.4626	1.744	0.075
Chine	2020	13	5	0.116353	92.9315	8607001	1.13263	92.8515	-0.474128	0.059	0.04	1	24.9412	88.4271	97.4514	93.9705	-5.1962e+08	-519.62	61.428	70.0528	0.621	0.238041	-0.0709567	14687744162801	13.167	-99.3748	34.7543	1.54101	29119.8	2.91198	0.464189	55.4626	1.744	0.076
Chine	2021	13	5	0.10171	93.6983	3083587	0.895482	94.3858	-0.516463	0.059	0.048	1	24.9412	90.0019	97.4102	94.633	-5.6414e+08	-564.14	62.512	73.0532	0.608	0.0892522	0.0303935	1.78205e+13	13.2509	-165.277	37.302	1.57173	30750.5	3.07505	0.487853	55.4626	1.744	0.077
Chine	2022	13	5	0.095241	94.4314	7773628	0.480467	95.8924	-0.451277	0.052	0.043	1	24.9412	92.0715	97.369	95.4386	-3.8058e+08	-380.58	63.56	75.6113	0.587	-0.0130995	0.0159702	1.78818e+13	13.2524	19.8464	38.3515	1.58378	31220.1	3.12201	0.494434	55.4626	1.744	0.075
Colombie	2000	14	4	2.88845	95.1305	4908	0.146594	75.4149	-1.60896	0.759	0.768	1	11.8012	70.0197	98.2785	90.919	3.2609e+08	326.09	73.957	2.20753	0.737	1.61983	-0.406263	9.98751e+10	10.9995	-2.11111	32.6671	1.51411	8011.81	0.801181	-0.0962692	40.4317	1.60672	0.552
Colombie	2001	14	4	2.83766	95.7947	7438335	0.149387	76.3088	-1.78284	0.759	0.762	1	11.8012	70.5885	98.3497	91.237	6.2961e+08	629.61	74.379	2.8542	0.737	1.57553	-0.335297	9.82006e+10	10.9921	-2.52582	33.9011	1.53021	7953.85	0.795385	-0.0994223	37.6251	1.57548	0.547
Colombie	2002	14	4	2.78766	96.425	4871783	0.152167	77.202	-1.95671	0.718	0.812	1	11.8012	71.1572	98.421	91.5497	7.019e+08	701.9	74.797	4.6	0.731	1.53487	-0.264331	9.79458e+10	10.991	-1.27687	32.9826	1.51829	7834.47	0.783447	-0.10599	37.5007	1.57404	0.532
Colombie	2003	14	4	2.73844	97.0229	234894	0.154933	78.0944	-2.37603	0.7	0.839	1	12.0482	71.726	98.4923	91.8572	1.1721e+09	1172.1	75.211	7.38892	0.731	1.48113	-0.204286	9.4645e+10	10.9761	-0.782806	36.5162	1.56249	7863.65	0.786365	-0.104376	37.9009	1.57865	0.536
Colombie	2004	14	4	2.69009	97.5899	987029	0.15769	78.9859	-2.27123	0.71	0.839	1	12.0482	72.2948	98.5636	92.1592	7.3079e+08	730.79	75.62	9.11869	0.731	1.42817	-0.140631	1.17092e+11	11.0685	-2.92319	35.8634	1.55465	8152.33	0.815233	-0.088718	38.2073	1.58215	0.54
Colombie	2005	14	4	2.64261	98.1274	7435226	0.160439	79.8764	-2.05794	0.72	0.839	1	12.1212	72.8635	98.6348	92.4559	8.4726e+08	847.26	76.024	11.0073	0.731	1.36565	-0.145389	1.45601e+11	11.1632	-5.43991	37.4227	1.57314	7917.91	0.791791	-0.10139	38.3569	1.58384	0.545
Colombie	2006	14	4	2.596	92.1066	5043025	0.163179	80.7659	-1.9048	0.72	0.84	1	8.43374	73.4323	98.7061	92.7473	1.27954e+09	1279.54	76.423	15.3417	0.703	1.29887	-0.175138	1.61793e+11	11.209	-5.48287	39.6414	1.59815	9024.09	0.902409	-0.0445964	38.0117	1.57992	0.568
Colombie	2007	14	4	2.55034	92.4185	2694013	0.165917	81.6542	-1.80653	0.733	0.844	1	8.43374	74.0011	98.7773	93.0332	8.7223e+08	872.23	76.816	21.8	0.705	1.23997	-0.27916	2.0623e+11	11.3144	-7.60697	37.0989	1.56936	9058	0.9058	-0.0429676	38.2479	1.58261	0.582
Colombie	2008	14	4	2.50554	92.7252	386286	0.168646	82.5414	-1.85346	0.729	0.857	1	8.43374	74.5698	98.8486	93.314	1.13539e+09	1135.39	77.204	25.6	0.705	1.16787	-0.261543	2.42504e+11	11.3847	-7.47903	39.1676	1.59293	9322.77	0.932277	-0.0304552	38.4083	1.58442	0.581
Colombie	2009	14	4	2.46157	93.0267	8119318	0.171367	83.4276	-1.83235	0.732	0.857	1	8.43374	75.1386	98.9199	93.5898	1.22871e+09	1228.71	77.587	30	0.705	1.13154	-0.337013	2.32469e+11	11.3664	-4.53009	35.1561	1.546	9111.86	0.911186	-0.0403929	38.3416	1.58367	0.585
Colombie	2010	14	4	2.41854	93.3229	58932	0.174086	84.3126	-1.53718	0.78	0.868	1	12.6506	75.7074	98.9911	93.8603	7.4049e+08	740.49	77.964	36.5	0.76	1.12688	-0.423333	2.86499e+11	11.4571	-0.947331	34.2646	1.53485	9474.3	0.94743	-0.0234531	38.3082	1.58329	0.622
Colombie	2011	14	4	2.37645	93.6139	3706996	0.176803	85.1964	-1.28466	0.841	0.886	1	12.1212	76.2761	99	94.1257	1.09876e+09	1098.76	78.335	40.3509	0.769	1.09358	-0.317528	3.34966e+11	11.525	-6.22722	39.4704	1.59627	9794.91	0.979491	-0.00899951	37.6034	1.57523	0.659
Colombie	2012	14	4	2.33517	93.8997	1559317	0.179513	86.079	-1.40181	0.842	0.891	1	12.1212	76.8449	99	94.3863	8.2956e+08	829.56	78.701	48.98	0.769	1.03966	-0.422298	3.70691e+11	11.569	-15.6462	38.8352	1.58922	10308.2	1.03082	0.0131817	38.4115	1.58446	0.657
Colombie	2013	14	4	2.29481	94.1803	9449921	0.182222	86.9605	-1.29197	0.83	0.915	1	12.1212	77.4137	99	94.642	8.9715e+08	897.15	79.061	51.7	0.753	0.990035	-0.441053	3.82094e+11	11.5822	-8.55834	37.9866	1.57963	10490.1	1.04901	0.0207788	40.3926	1.6063	0.665
Colombie	2014	14	4	2.25535	94.4558	7378203	0.18493	87.8407	-1.11459	0.83	0.918	1	19.8795	77.9825	99	94.8928	1.25588e+09	1255.88	79.415	52.5681	0.789	0.947137	-0.397179	3.81241e+11	11.5812	-12.2698	37.4875	1.57389	10938.5	1.09385	0.038957	40.3785	1.60615	0.675
Colombie	2015	14	4	2.2167	94.7265	5342605	0.187633	88.7199	-1.07266	0.837	0.918	1	19.8795	78.5513	99	95.139	1.5537e+09	1553.7	79.764	55.905	0.786	0.941994	-0.35224	2.93492e+11	11.4676	-7.4028	38.3608	1.58389	10259	1.0259	0.0111067	40.3645	1.606	0.684
Colombie	2016	14	4	2.17884	94.9921	3342423	0.190329	89.598	-0.887164	0.836	0.92	1	19.8795	79.12	99	95.3807	1.27363e+09	1273.63	80.108	58.1365	0.77	1.06861	-0.384033	2.8272e+11	11.4514	-9.34059	36.2027	1.55874	11435.3	1.14353	0.0582477	40.3504	1.60585	0.677
Colombie	2017	14	4	2.14186	95.2528	1377501	0.193027	90.4749	-0.779458	0.84	0.91	1	18.6747	79.6888	99	95.6178	9.526e+08	952.6	80.446	62.2599	0.769	1.51229	-0.429445	3.11867e+11	11.494	-10.0113	35.2829	1.54756	11368.8	1.13688	0.0557159	39.1951	1.59323	0.676
Colombie	2018	14	4	2.10572	95.5089	9590607	0.195716	91.3507	-0.806942	0.784	0.884	1	18.1287	80.2576	99	95.8504	1.90284e+09	1902.84	80.778	64.1264	0.758	1.89559	-0.339971	3.34198e+11	11.524	-6.17238	36.5348	1.56271	11332.2	1.13322	0.054316	39.7008	1.5988	0.667
Colombie	2019	14	4	2.07032	95.7602	8387904	0.198367	92.2252	-0.979486	0.741	0.883	1	18.7135	80.8264	99	96.0786	9.5127e+08	951.27	81.104	65.0069	0.762	1.83075	-0.283157	3.23032e+11	11.5092	-10.8357	37.5585	1.57471	11221.8	1.12218	0.050062	39.9766	1.60181	0.649
Colombie	2020	14	4	2.03567	96.0068	7222962	0.20101	93.0987	-0.70115	0.731	0.861	1	18.3432	81.3952	99	96.3026	1.99572e+09	1995.72	81.425	69.7953	0.76	1.4701	-0.251916	2.70348e+11	11.4319	-5.72518	34.0556	1.53219	10064.4	1.00644	0.00278741	39.7046	1.59884	0.64
Colombie	2021	14	4	1.79282	96.249	6095445	0.203817	93.9711	-0.954574	0.772	0.847	1	18.8235	81.9639	99	96.5223	1.91693e+09	1916.93	81.74	73.0284	0.746	1.14382	-0.365435	3.18525e+11	11.5031	-6.38052	40.0591	1.6027	11156.5	1.11565	0.0475286	38.502	1.58548	0.646
Colombie	2022	14	4	1.75538	96.4869	50039864	0.206461	94.8425	-0.629958	0.84	0.89	1	28.877	82.5327	99	96.738	1.94159e+09	1941.59	82.05	72.7964	0.777	0.691482	-0.361808	3.4533e+11	11.5382	-13.7993	48.074	1.68191	11760.6	1.17606	0.0704279	39.1033	1.59221	0.694
Congo	2000	15	1	8.31843	91.2035	46487	7.44815	23.7477	-0.922982	0.382	0.413	1	12	21.0196	84.7034	58.3988	5.442e+07	54.42	58.695	0.00590211	0.316	3.81698	-0.943887	3.22793e+09	9.50892	-0.162462	123.91	2.09311	1227.49	0.122749	-0.910981	30.8638	1.48945	0.161
Congo	2001	15	1	8.22559	91.1048	382942	8.0608	23.2926	-1.25508	0.363	0.413	1	12	21.0196	84.7034	58.6924	1.2009e+08	120.09	59.156	0.0114758	0.316	3.75963	-0.976452	2.7967e+09	9.44665	-0.0714038	130.732	2.11638	1451.2	0.14512	-0.838274	30.8638	1.48945	0.158
Congo	2002	15	1	8.13275	91.0093	294548	8.68578	22.841	-1.58717	0.363	0.477	1	12	21.2907	84.8523	59.1842	9.199e+07	91.99	59.617	0.0927907	0.302	2.34039	-1.00902	3.03425e+09	9.48205	-0.328526	135.456	2.1318	1311.92	0.131192	-0.882092	30.8638	1.48945	0.206
Congo	2003	15	1	8.04031	91.0225	199635	9.32314	22.393	-1.17022	0.363	0.491	1	8.52713	21.5618	85.0013	59.6737	9.349e+07	93.49	60.076	0.134915	0.29	2.76802	-1.09014	3.50372e+09	9.54453	-0.322126	156.862	2.19552	1459.17	0.145917	-0.835895	30.8638	1.48945	0.255
Congo	2004	15	1	7.92287	91.0372	9815	9.97294	21.9486	-1.1906	0.363	0.491	1	8.52713	22.9917	85.1503	60.6182	1.4118e+08	141.18	60.533	0.196208	0.29	3.39771	-1.03629	4.65697e+09	9.6681	0.0130846	131.368	2.11849	1496.14	0.149614	-0.825028	30.8785	1.48966	0.255
Congo	2005	15	1	7.80643	91.0532	98863	10.6354	21.5079	-1.16584	0.363	0.491	1	8.52713	24.4503	85.2994	61.561	1.67624e+09	1676.24	60.988	0.238038	0.29	3.59877	-1.05944	6.65e+09	9.82282	-0.51379	119.553	2.07756	1950.97	0.195097	-0.70975	30.8843	1.48974	0.255
Congo	2006	15	1	7.69096	91.0709	870243	11.3108	21.0891	-0.923412	0.363	0.491	1	8.52713	25.9377	85.4486	62.5018	2.9744e+08	297.44	61.441	0.296054	0.29	3.75361	-1.10828	8.07231e+09	9.907	-1.48902	125.601	2.09899	2240.82	0.224082	-0.649594	30.8931	1.48986	0.255
Congo	2007	15	1	7.57628	66.9139	74283	11.9992	20.6788	-0.771577	0.363	0.49	1	7.29927	27.454	85.5978	63.4409	1.082e+08	108.2	61.893	0.37	0.283	3.68156	-1.16096	8.7827e+09	9.94363	-1.46957	148.587	2.17198	2657.68	0.265768	-0.575497	30.8931	1.48986	0.253
Congo	2008	15	1	7.46235	67.2291	606964	12.7007	20.2769	-0.721322	0.363	0.489	1	7.29927	28.9989	85.7471	64.3791	4.4303e+08	443.03	62.346	0.44	0.283	3.31311	-1.19325	1.16499e+10	10.0663	-2.0401	133.108	2.12421	2926.5	0.29265	-0.533651	30.8931	1.48986	0.252
Congo	2009	15	1	7.34903	67.6306	46178	13.4155	19.8836	-0.250488	0.363	0.485	1	7.29927	30.5727	85.8964	65.316	2.7224e+08	272.24	62.8	0.56	0.283	4.01711	-1.21384	9.7233e+09	9.98781	-1.27895	135.552	2.13211	3411.9	0.34119	-0.467004	30.9312	1.4904	0.254
Congo	2010	15	1	7.2359	68.0321	307873	14.1435	19.4987	-0.316416	0.359	0.478	1	7.29927	32.1752	86.0458	66.2516	1.34657e+09	1346.57	63.256	0.72	0.279	4.1559	-1.15732	1.31484e+10	10.1189	-0.929342	124.065	2.09365	4460.02	0.446002	-0.350663	30.9693	1.49093	0.257
Congo	2011	15	1	7.12337	69.2673	144356	14.8851	19.1225	-0.3543	0.359	0.478	1	7.29927	33.8065	86.1953	67.1844	2.5919e+08	259.19	63.712	1.2	0.279	3.24414	-1.14499	1.56554e+10	10.1947	-0.198719	124.592	2.09549	5186.76	0.518676	-0.285104	31.0278	1.49175	0.257
Congo	2012	15	1	7.01124	70.4833	971848	15.6402	18.7547	-0.48969	0.359	0.469	1	7.35294	35.4666	86.3448	68.1146	1.4551e+08	145.51	64.169	1.67996	0.297	2.77601	-1.22975	1.76929e+10	10.2478	0.289682	97.4444	1.98876	5174.51	0.517451	-0.286131	31.0454	1.492	0.255
Congo	2013	15	1	6.89951	71.6801	790226	16.409	18.3954	-0.47505	0.394	0.415	1	7.35294	37.1555	86.4944	69.0417	1.5192e+08	151.92	64.627	2.2	0.327	2.40668	-1.17657	1.79587e+10	10.2543	-0.596093	93.0029	1.9685	6385.9	0.63859	-0.194778	31.1186	1.49302	0.25
Congo	2014	15	1	6.78838	72.8584	59896	17.1916	18.0446	-0.359292	0.394	0.415	1	7.35294	38.8731	86.644	69.9648	1.0596e+08	105.96	65.085	3	0.327	2.39029	-1.19982	1.79193e+10	10.2533	-1.64015	104.198	2.01786	5931.77	0.593177	-0.226816	31.1186	1.49302	0.25
Congo	2015	15	1	6.67785	74.0196	398327	17.9881	17.7023	-0.529127	0.394	0.415	1	7.35294	40.6196	86.7937	70.8835	1.0155e+08	101.55	65.543	3.8	0.325	2.38841	-1.27094	1.24348e+10	10.0946	-3.73041	117.321	2.06937	5841.06	0.584106	-0.233509	31.1186	1.49302	0.25
Congo	2016	15	1	6.56791	75.1635	1882	18.7986	17.3684	-0.523459	0.394	0.424	1	7.35294	42.3947	86.9435	71.7973	9.892e+07	98.92	66.001	10.1	0.325	2.38887	-1.22709	1.09313e+10	10.0387	1.14714	122.26	2.08728	5449.97	0.544997	-0.263606	31.1186	1.49302	0.245
Congo	2017	15	1	6.45857	76.2906	968876	19.6231	17.0428	-0.533615	0.402	0.437	1	11.2583	44.1987	87.0933	72.706	1.192e+08	119.2	66.459	8.6199	0.363	2.39109	-1.36761	1.18345e+10	10.0731	-1.29163	94.6171	1.97597	3985.21	0.398521	-0.399549	31.1215	1.49306	0.247
Congo	2018	15	1	6.3707	77.3998	739826	20.4618	16.7256	-0.348339	0.43	0.463	1	11.2583	44.1987	87.0933	72.9021	1.5596e+08	155.96	66.916	11.7	0.417	2.39418	-1.37776	1.47739e+10	10.1695	-0.0722474	100.583	2.00253	3605.27	0.360527	-0.443062	31.1303	1.49318	0.252
Congo	2019	15	1	6.28282	78.4915	501347	21.3148	16.4167	-0.299274	0.379	0.448	1	11.2583	44.1987	87.0933	73.0981	1.9347e+08	193.47	67.373	16.4812	0.405	2.35524	-1.43593	1.39766e+10	10.1454	1.85022	91.5758	1.96178	2873.82	0.287382	-0.54154	31.1362	1.49327	0.24
Congo	2020	15	1	6.19514	79.5657	25335	22.1821	16.1159	-0.213043	0.372	0.503	1	11.2583	44.1987	87.0933	73.2937	2.2797e+08	227.97	67.829	19.8388	0.377	2.33209	-1.46042	1.14687e+10	10.0595	1.00198	69.3066	1.84077	2379.56	0.237956	-0.623504	31.1537	1.49351	0.249
Congo	2021	15	1	6.10784	80.6219	638054	23.0637	16.1462	-0.229436	0.403	0.49	1	11.2583	44.1987	87.0933	73.4884	2.0402e+08	204.02	68.283	26.17	0.362	2.31649	-1.39148	1.48257e+10	10.171	0.330178	85.5462	1.9322	2348.01	0.234801	-0.6293	31.2679	1.4951	0.247
Congo	2022	15	1	6.15149	80.0938	184	23.9598	16.1745	0.0389938	0.353	0.443	1	14.5695	44.1987	87.0933	73.4884	7.3879e+08	738.79	68.736	27.24	0.408	2.28056	-1.35945	1.5817e+10	10.1991	0.666079	98.1613	1.99194	2363.78	0.236378	-0.626392	31.2108	1.49431	0.236
Benin	2000	16	1	11.2384	69.1051	656487	7.36472	8.52812	0.799653	0.896	0.85	1	6.0241	51.6332	76.2079	61.0534	4.0861e+08	408.61	38.333	0.225248	0.842	3.07665	-0.700918	3.51999e+09	9.54654	-0.0562934	47.3482	1.6753	980.964	0.0980964	-1.00835	28.3345	1.45232	0.612
Benin	2001	16	1	10.8407	69.409	750252	7.40736	8.93975	0.810584	0.9	0.851	1	6.0241	52.0966	76.1961	61.411	4.7045e+08	470.45	38.65	0.363418	0.842	3.05436	-0.748314	3.66622e+09	9.56422	-0.0415894	48.2572	1.68356	1083.35	0.108335	-0.965233	28.9553	1.46173	0.613
Benin	2002	16	1	10.4384	69.722	83953	7.4459	9.37391	0.821516	0.903	0.851	1	6.0241	52.5612	76.1842	61.7827	3.5707e+08	357.07	39.036	0.702946	0.842	3.04011	-0.79571	4.19434e+09	9.62266	-0.0122154	43.7684	1.64116	1204.55	0.120455	-0.919177	29.8421	1.47483	0.615
Benin	2003	16	1	10.0279	70.051	921036	7.47773	9.83877	0.679286	0.903	0.852	1	6.0241	53.0271	76.1722	62.1778	4.1352e+08	413.52	39.536	0.951327	0.848	3.0492	-0.577583	5.34926e+09	9.72829	-0.0445165	41.6162	1.61926	1357	0.1357	-0.867419	30.7467	1.4878	0.607
Benin	2004	16	1	9.61996	70.3754	4606	7.50946	10.3156	0.265973	0.903	0.852	1	7.22892	53.4943	76.1601	62.5695	4.8716e+08	487.16	40.039	1.18254	0.848	3.06173	-0.563023	6.19027e+09	9.79171	-0.0652712	39.903	1.60101	1388.15	0.138815	-0.857562	30.7467	1.4878	0.605
Benin	2005	16	1	9.21471	70.6949	9042	7.54121	10.804	0.449746	0.88	0.852	1	7.22892	53.9628	76.1479	62.9573	4.2515e+08	425.15	40.543	1.27103	0.848	3.22061	-0.871326	6.56765e+09	9.81741	-0.0534501	39.0959	1.59213	1262.39	0.126239	-0.898805	30.8975	1.48992	0.636
Benin	2006	16	1	8.8121	71.0095	178402	7.57292	11.304	0.547893	0.853	0.867	1	7.22892	54.4325	76.1356	63.3414	4.7367e+08	473.67	41.049	1.53785	0.847	3.12067	-0.587096	7.03411e+09	9.84721	-0.0549782	39.7747	1.59961	1672.02	0.167202	-0.776759	29.6204	1.47159	0.665
Benin	2007	16	1	8.41206	71.3194	268503	7.60453	11.8157	0.386218	0.847	0.865	1	10.8434	54.9035	76.1232	63.722	4.4772e+08	447.72	41.558	1.79	0.853	2.9551	-0.470139	8.16905e+09	9.91217	-0.261682	49.1138	1.6912	1918.38	0.191838	-0.717065	29.7091	1.47289	0.659
Benin	2008	16	1	8.0147	71.6245	36081	7.63611	12.339	0.376421	0.847	0.854	1	10.8434	55.3758	76.1107	64.0988	5.4855e+08	548.55	42.069	1.85	0.853	3.01959	-0.514077	9.78773e+09	9.99068	-0.174531	47.7754	1.6792	1904.89	0.190489	-0.72013	31.4828	1.49807	0.647
Benin	2009	16	1	7.62018	71.9243	455477	7.66778	12.8734	0.403667	0.849	0.854	1	10.8434	55.8493	76.0982	64.4713	6.1132e+08	611.32	42.58	2.24	0.853	2.99904	-0.627268	9.73863e+09	9.9885	-0.103514	44.7026	1.65033	2054.22	0.205422	-0.687354	32.3696	1.51014	0.646
Benin	2010	16	1	7.22837	72.2193	552366	7.69942	13.4191	0.26126	0.848	0.857	1	10.8434	56.3242	76.0854	64.8399	7.382e+08	738.2	43.093	3.13	0.865	2.98424	-0.665382	9.53535e+09	9.97934	-0.194907	51.4309	1.71122	2287.77	0.228777	-0.640588	32.3696	1.51014	0.648
Benin	2011	16	1	6.83927	72.5092	651499	7.73104	13.9761	0.318356	0.843	0.858	1	8.43374	56.8003	76.0726	65.2046	7.0319e+08	703.19	43.608	4.14832	0.86	2.97782	-0.605446	1.06933e+10	10.0291	-0.101575	47.217	1.6741	2071.19	0.207119	-0.683781	32.3696	1.51014	0.605
Benin	2012	16	1	6.4529	72.7942	75288	7.76264	14.5443	0.364368	0.851	0.858	1	8.43374	57.2776	76.0597	65.5652	5.2887e+08	528.87	44.125	4.5	0.86	2.96767	-0.857918	1.11414e+10	10.0469	-0.241215	50.7367	1.70532	1909.26	0.190926	-0.719134	33.2565	1.52188	0.599
Benin	2013	16	1	6.06942	73.0739	856653	7.79433	15.1233	0.301189	0.859	0.845	1	8.43374	57.7563	76.0467	65.9215	6.7034e+08	670.34	44.642	4.9	0.853	2.94885	-0.745443	1.25178e+10	10.0975	-0.301754	59.2002	1.77232	1889.73	0.188973	-0.723599	35.0302	1.54444	0.606
Benin	2014	16	1	5.68839	73.3492	962404	7.82573	15.7143	0.0271398	0.853	0.845	1	8.43374	58.2362	76.0336	66.2746	6.1076e+08	610.76	45.166	6	0.846	2.95502	-0.669144	1.32845e+10	10.1233	-0.388459	65.2683	1.8147	1940.27	0.194027	-0.712139	35.0302	1.54444	0.608
Benin	2015	16	1	5.30998	73.6197	70292	7.85696	16.3169	-0.0204964	0.861	0.839	1	7.22892	58.7174	76.0204	66.624	5.0015e+08	500.15	45.695	11.255	0.839	2.95392	-0.563475	1.13882e+10	10.0565	-0.117056	56.7563	1.75401	2083.5	0.20835	-0.681207	35.0302	1.54444	0.661
Benin	2016	16	1	4.93426	73.8854	180353	7.88803	16.9311	-0.0087835	0.851	0.857	1	7.22892	59.1999	76.0071	66.9697	5.7307e+08	573.07	46.229	14.5	0.843	2.9246	-0.52912	1.18211e+10	10.0727	-0.11441	58.9869	1.77076	2467.01	0.246701	-0.607829	35.0302	1.54444	0.713
Benin	2017	16	1	4.56124	74.1461	292631	7.91893	17.5567	0.0262525	0.837	0.865	1	7.22892	59.6837	75.9937	67.3115	7.5982e+08	759.82	46.768	18.7	0.852	2.88118	-0.577509	1.27017e+10	10.1039	-0.168995	61.4766	1.78871	2540.22	0.254022	-0.595128	35.0302	1.54444	0.709
Benin	2018	16	1	4.19098	74.4019	407145	7.94968	18.1937	-0.14699	0.757	0.724	1	7.22892	60.1687	75.9802	67.6494	6.1551e+08	615.51	47.312	19	0.849	2.81364	-0.391388	1.42624e+10	10.1542	-0.184303	61.7952	1.79095	2736.8	0.27368	-0.562757	35.0302	1.54444	0.618
Benin	2019	16	1	3.82351	74.6526	523941	7.98028	18.8421	-0.42024	0.646	0.639	1	7.22892	60.655	75.9666	67.9833	6.4704e+08	647.04	47.861	20.5	0.826	2.73539	-0.330108	1.43907e+10	10.1581	-0.191058	63.6813	1.80401	2416.16	0.241616	-0.616874	35.0302	1.54444	0.466
Benin	2020	16	1	3.45888	74.8981	643047	8.01074	19.5017	-0.443072	0.664	0.557	1	7.22892	61.1426	75.9528	68.313	1.11291e+09	1112.91	48.415	22.1206	0.83	2.6626	-0.0403278	1.56867e+10	10.1955	-0.152493	44.8332	1.6516	2518.62	0.251862	-0.598837	35.0302	1.54444	0.415
Benin	2021	16	1	3.09722	75.1382	764587	8.01229	20.1721	-0.396319	0.696	0.476	1	8.43374	61.6314	75.939	68.6381	8.4998e+08	849.98	48.972	30.7419	0.821	2.5923	-0.170944	1.76876e+10	10.2477	-0.303083	48.0549	1.68174	2484.82	0.248482	-0.604705	35.0302	1.54444	0.397
Benin	2022	16	1	2.73846	75.373	8885	8.01277	20.8537	-0.343203	0.73	0.573	1	7.40741	62.1215	75.9251	68.959	8.7353e+08	873.53	49.534	33.7602	0.821	2.54741	-0.124256	1.74254e+10	10.2412	-0.227788	50.9335	1.707	2501.72	0.250172	-0.601761	35.0302	1.54444	0.436
Gabon	2000	17	1	11.2735	100	542809	3.78037	26.8182	0.640211	0.688	0.675	1	9.16667	42.4111	90.1477	80.0653	2.212e+07	22.12	78.879	1.21614	0.63	2.55979	-0.592372	5.08048e+09	9.70591	0.0679573	101.702	2.00733	9016.45	0.901645	-0.0449643	8.02189	0.904277	0.34
Gabon	2001	17	1	10.6253	100	496128	4.06809	27.9501	0.52523	0.712	0.675	1	9.16667	42.7398	90.2445	80.5692	1.404e+07	14.04	79.633	1.34762	0.694	2.60954	-0.556375	5.02327e+09	9.70099	0.0928464	83.6386	1.92241	9478.86	0.947886	-0.0232441	8.04152	0.905338	0.345
Gabon	2002	17	1	10.0012	100	44828	4.35705	29.102	0.410249	0.717	0.669	1	9.16667	43.0651	90.3413	81.06	1.1451e+08	114.51	80.368	1.93953	0.695	2.65138	-0.520379	5.33545e+09	9.72717	-0.0619924	84.7591	1.92819	9233.19	0.923319	-0.0346481	8.06116	0.906397	0.349
Gabon	2003	17	1	9.40076	100	399472	4.64707	30.2735	0.299039	0.717	0.669	1	9.2437	43.3869	90.438	81.5373	-13000000	-13	81.083	2.65959	0.695	2.69875	-0.553777	6.5119e+09	9.81371	-0.178873	80.3026	1.90473	8742.19	0.874219	-0.0583799	8.08079	0.907454	0.349
Gabon	2004	17	1	8.82338	100	3498473	4.93796	31.4643	0.408171	0.717	0.669	1	9.2437	43.7054	90.5346	82.0014	4.885e+07	48.85	81.778	2.97907	0.695	2.76976	-0.82665	7.77022e+09	9.89043	-0.34428	81.7675	1.91258	8665.52	0.866552	-0.0622054	8.10042	0.908508	0.349
Gabon	2005	17	1	8.26873	100	2996435	5.22957	32.6739	0.325626	0.729	0.67	1	9.2437	44.0204	90.6312	82.4519	5.907e+07	59.07	82.452	4.89326	0.695	2.86881	-0.660074	9.58278e+09	9.98149	-0.166928	83.9496	1.92402	9015.14	0.901514	-0.0450275	8.12006	0.909559	0.351
Gabon	2006	17	1	7.73543	100	2487507	5.52172	33.9025	0.220006	0.729	0.677	1	12.5	44.332	90.7277	82.8901	3.544e+07	35.44	83.107	5.4892	0.709	2.98453	-1.08307	1.03276e+10	10.014	-0.255604	88.6494	1.94768	8974.72	0.897472	-0.0469793	8.13969	0.910608	0.354
Gabon	2007	17	1	7.22316	84.1837	197413	5.81428	35.1495	0.302845	0.729	0.677	1	16.6667	44.6402	90.8241	83.3156	5.513e+07	55.13	83.742	5.767	0.725	3.09561	-1.16633	1.24554e+10	10.0954	-0.595952	85.1325	1.9301	8646.73	0.864673	-0.0631479	8.15932	0.911654	0.356
Gabon	2008	17	1	6.73065	84.8786	1455283	6.1071	36.4153	0.261875	0.729	0.677	1	16.6667	44.945	90.9205	83.7295	6.163e+07	61.63	84.359	7.5	0.709	3.18808	-1.16565	1.55713e+10	10.1923	-0.821609	88.9989	1.94938	8547.84	0.854784	-0.0681436	8.17896	0.912698	0.356
Gabon	2009	17	1	6.25817	85.5505	93558	6.40013	37.6987	0.140439	0.732	0.678	1	16.6667	45.2464	91.0169	84.1307	7.767e+07	77.67	84.955	9.5	0.709	3.29298	-1.07715	1.21137e+10	10.0833	-0.392176	83.5046	1.92171	8182.46	0.818246	-0.0871163	8.19859	0.913739	0.356
Gabon	2010	17	1	5.80418	86.1998	4127	6.6932	39.0003	0.299279	0.78	0.685	1	14.6552	45.5444	91.1132	84.5207	1.0349e+08	103.49	85.533	13	0.727	3.42197	-0.905258	1.43726e+10	10.1575	-0.146801	89.1577	1.95016	9214.65	0.921465	-0.0355212	8.21822	0.914778	0.372
Gabon	2011	17	1	5.36832	86.8268	9889092	6.98627	40.3194	0.384891	0.78	0.685	1	14.1667	45.8389	91.2094	84.8993	6.431e+07	64.31	86.092	18	0.722	3.52516	-0.893179	1.82103e+10	10.2603	-1.09813	90.4984	1.95664	9102.3	0.91023	-0.040849	8.26434	0.917208	0.372
Gabon	2012	17	1	4.94946	87.4316	9363387	7.2792	41.6563	0.293291	0.764	0.7	1	15.7895	46.1301	91.3056	85.2674	6.956e+07	69.56	86.634	24	0.727	3.55822	-0.666252	1.71705e+10	10.2348	0.23341	92.3428	1.9654	11006.1	1.10061	0.0416332	8.31045	0.919625	0.371
Gabon	2013	17	1	4.54776	88.0158	8840451	7.57204	43.01	0.330103	0.819	0.704	1	15.7895	46.4178	91.4017	85.6239	8.638e+07	86.38	87.156	30.538	0.751	3.50516	-0.634199	1.75957e+10	10.2454	-0.0877419	90.635	1.9573	10740.3	1.07403	0.0310151	8.35656	0.922028	0.374
Gabon	2014	17	1	4.16426	88.5794	833068	7.86503	44.378	0.149543	0.819	0.704	1	15	46.7021	91.4977	85.9659	1.096e+08	109.6	87.651	38.0712	0.754	3.3411	-0.677636	1.8204e+10	10.2602	-0.78297	73.5203	1.86641	10845.5	1.08455	0.0352489	8.35656	0.922028	0.374
Gabon	2015	17	1	3.79829	89.1238	7837076	7.87927	45.7596	0.0152473	0.819	0.704	1	14.1667	46.983	91.5937	86.293	1.1323e+08	113.23	88.118	45.7845	0.754	3.08692	-0.723359	1.43831e+10	10.1579	-0.0252532	73.9498	1.86894	10108.5	1.01085	0.00468641	8.35656	0.922028	0.374
Gabon	2016	17	1	3.44845	89.6483	7358773	7.89287	47.1547	-0.110106	0.819	0.706	1	14.1667	47.2604	91.6896	86.6065	4.708e+07	47.08	88.559	48.0523	0.765	2.80421	-0.758523	1.40239e+10	10.1469	-0.404112	70.1334	1.84592	9740.7	0.97407	-0.0114099	8.35656	0.922028	0.379
Gabon	2017	17	1	3.11348	90.1546	6894617	7.90589	48.5637	-0.105891	0.807	0.734	1	17.094	47.5345	91.7855	86.9072	1.1854e+08	118.54	88.976	50.3201	0.783	2.55592	-0.8415	1.49295e+10	10.174	-0.214682	75.0687	1.87546	10052.4	1.00524	0.00226957	8.35656	0.922028	0.395
Gabon	2018	17	1	2.79236	90.6428	6444762	7.91842	49.9864	-0.257341	0.779	0.726	1	17.9104	47.8051	91.8813	87.196	1.2368e+08	123.68	89.37	59.6	0.793	2.39136	-0.858978	1.68673e+10	10.227	-0.309397	77.0366	1.8867	8795.32	0.879532	-0.0557482	8.35656	0.922028	0.388
Gabon	2019	17	1	2.48432	91.1142	6010628	7.93059	51.4223	-0.0750986	0.784	0.658	1	14.7887	48.0724	91.977	87.4728	1.2724e+08	127.24	89.741	68.6855	0.762	2.28986	-0.888111	1.68744e+10	10.2272	-0.26204	73.4281	1.86586	7427.66	0.742766	-0.129148	8.35656	0.922028	0.386
Gabon	2020	17	1	2.18808	91.5682	5589428	7.94238	52.872	-0.0657728	0.748	0.65	1	16.1972	48.3362	92.0727	87.7393	5.605e+07	56.05	90.092	72.2754	0.764	2.19564	-0.887643	1.53146e+10	10.1851	-0.285718	70.06	1.84547	8367.07	0.836707	-0.0774267	8.35656	0.922028	0.376
Gabon	2021	17	1	1.90295	92.0027	5182369	7.95389	54.3352	-0.0757173	0.748	0.65	1	15.3846	48.5966	92.1683	87.9955	9.855e+07	98.55	90.423	73.1414	0.763	2.09799	-0.869527	2.02179e+10	10.3057	-0.273879	74.492	1.87211	8009.64	0.800964	-0.0963868	8.35656	0.922028	0.376
Gabon	2022	17	1	1.62811	92.418	4789362	7.96518	55.8117	0.0603694	0.725	0.644	1	25.7143	48.8536	92.2639	88.2419	1.4581e+08	145.81	90.735	73.6951	0.772	2.02169	-1.0481	2.10717e+10	10.3237	-0.279799	77.9447	1.89179	8188.36	0.818836	-0.0868033	8.35656	0.922028	0.37
Rwanda	2000	18	1	18.4414	99.9828	347739	21.7231	43.8876	-1.69159	0.206	0.193	1	25.7143	43.1174	72.9528	47.5706	521750000	521.75	14.926	0.0628315	0.802	1.24573	-0.733605	2.06884e+09	9.31573	-0.181538	27.4849	1.43909	357.734	0.0357734	-1.44644	74.017	1.86933	0.114
Rwanda	2001	18	1	17.7383	99.989	57558	21.6068	45.6902	-1.67155	0.206	0.193	1	25.6757	43.6336	73.5581	48.3703	5.0535e+08	505.35	15.829	0.240672	0.807	1.3953	-0.724835	1.9666e+09	9.29372	-0.181436	29.199	1.46537	347.059	0.0347059	-1.4596	76.895	1.8859	0.114
Rwanda	2002	18	1	17.0366	99.7213	762967	21.4735	47.4612	-1.65151	0.211	0.183	1	25.695	44.15	74.1654	49.1857	5.6489e+08	564.89	16.777	0.292785	0.807	1.78798	-0.716066	1.966e+09	9.29358	-0.18164	27.6095	1.44106	348.555	0.0348555	-1.45773	76.5302	1.88383	0.114
Rwanda	2003	18	1	16.4353	99.7213	53458	21.4117	49.0827	-1.11252	0.229	0.188	1	48.75	44.6667	74.7746	49.7562	4.6476e+08	464.76	16.904	0.356918	0.823	2.3104	-0.588588	2.13824e+09	9.33006	-0.181233	29.3106	1.46703	338.953	0.0338953	-1.46986	76.4491	1.88337	0.123
Rwanda	2004	18	1	15.8483	99.7213	316179	21.3548	50.6829	-1.18625	0.213	0.202	1	48.75	45.1836	75.3857	50.2902	6.1179e+08	611.79	16.908	0.430854	0.825	2.57921	-0.412592	2.3765e+09	9.37594	-0.182046	33.4617	1.52455	318.321	0.0318321	-1.49714	76.3275	1.88268	0.199
Rwanda	2005	18	1	15.2615	99.7213	97775	21.2903	52.2807	-1.00021	0.206	0.2	1	48.75	45.7008	75.9988	50.8248	6.9099e+08	690.99	16.912	0.556041	0.826	2.63169	-0.629166	2.93382e+09	9.46743	-0.18042	34.2165	1.53424	300.623	0.0300623	-1.52198	76.2465	1.88222	0.197
Rwanda	2006	18	1	14.6745	99.7213	879289	21.2182	53.8759	-0.684062	0.211	0.2	1	48.75	46.2181	76.6137	51.3601	7.0709e+08	707.09	16.917	0.493447	0.827	2.66481	-0.205525	3.31978e+09	9.52111	-0.183672	33.2214	1.52142	283.975	0.0283975	-1.54672	76.3681	1.88291	0.199
Rwanda	2007	18	1	14.0877	99.7213	660874	21.1386	55.4686	-0.360214	0.211	0.202	1	48.75	46.7357	77.2306	51.8957	6.6837e+08	668.37	16.921	2.11539	0.827	2.69371	0.00706777	4.07051e+09	9.60965	-0.177168	35.971	1.55595	282.629	0.0282629	-1.54878	76.1248	1.88153	0.2
Rwanda	2008	18	1	13.5009	99.7352	442464	21.0516	57.0587	-0.32767	0.211	0.204	1	56.25	47.2535	77.8494	52.4319	8.2807e+08	828.07	16.925	4.5	0.828	2.6816	0.108793	5.17985e+09	9.71432	-0.190176	37.6045	1.57524	289.523	0.0289523	-1.53832	76.2059	1.88199	0.205
Rwanda	2009	18	1	12.9141	99.7491	223963	20.9569	58.6464	-0.506896	0.211	0.21	1	52.5	47.7715	78.4702	52.9688	8.8777e+08	887.77	16.93	7.7	0.828	2.64057	0.108439	5.67448e+09	9.75393	-0.16416	36.8056	1.56591	297.063	0.0297063	-1.52715	77.2598	1.88795	0.22
Rwanda	2010	18	1	12.3273	99.763	5538	20.8548	60.2315	-0.272094	0.202	0.219	1	56.25	48.2897	79.0929	53.5059	1.11973e+09	1119.73	16.934	8	0.828	2.60711	0.36517	6.12476e+09	9.78709	-0.216193	37.2789	1.57146	324.944	0.0324944	-1.48819	77.9084	1.89158	0.216
Rwanda	2011	18	1	11.7407	99.7768	787117	20.7452	61.8141	-0.177118	0.203	0.218	1	56.25	48.8082	79.7175	54.0436	1300500000	1300.5	16.938	7	0.832	2.56551	0.362672	6.88491e+09	9.8379	-0.112128	39.7161	1.59897	351.946	0.0351946	-1.45352	78.7596	1.8963	0.215
Rwanda	2012	18	1	11.1539	99.7907	568601	20.628	63.3941	-0.230615	0.216	0.226	1	56.25	49.3269	80.344	54.5821	9.2671e+08	926.71	16.943	8.02385	0.843	2.45984	0.55988	7.65476e+09	9.88393	-0.269616	40.5409	1.60789	376.878	0.0376878	-1.4238	79.4082	1.89987	0.219
Rwanda	2013	18	1	10.5673	99.8046	350173	20.5033	64.9716	-0.110952	0.222	0.221	1	63.75	49.8458	80.9724	55.1208	1.12245e+09	1122.45	16.947	9	0.841	2.37929	0.625127	7.81996e+09	9.8932	-0.233764	42.6935	1.63036	390.732	0.0390732	-1.40812	80.2594	1.9045	0.221
Rwanda	2014	18	1	9.9795	99.8185	130359	20.3691	66.5451	-0.31347	0.236	0.224	1	63.75	50.3649	81.6028	55.6651	1.06268e+09	1062.68	16.967	10.6	0.833	2.37753	0.7763	8.23897e+09	9.91587	-0.310209	43.9027	1.64249	403.43	0.040343	-1.39423	81.3133	1.91016	0.225
Rwanda	2015	18	1	9.39069	99.8324	90905	20.225	68.1135	0.00251838	0.232	0.224	1	63.75	50.8843	82.2351	56.2152	1.22492e+09	1224.92	17.004	12.5	0.833	2.38596	0.597625	8.54376e+09	9.93165	-0.158631	45.202	1.65516	436.214	0.0436214	-1.3603	81.3539	1.91038	0.227
Rwanda	2016	18	1	8.80117	99.8463	68641	20.0713	69.6758	-0.0665187	0.23	0.22	1	63.75	51.4039	82.8693	56.7706	1.31295e+09	1312.95	17.056	14.6	0.812	2.443	0.618456	8.69527e+09	9.93928	-0.231991	49.4849	1.69447	429.518	0.0429518	-1.36702	81.2728	1.90995	0.225
Rwanda	2017	18	1	8.21096	99.8602	462238	19.9075	71.2309	0.078271	0.213	0.214	1	61.25	51.9237	83.5055	57.332	1.37873e+09	1378.73	17.125	17.2	0.796	2.47881	0.607265	9.25283e+09	9.96627	-0.258339	53.6753	1.72977	458.821	0.0458821	-1.33836	81.2728	1.90995	0.223
Rwanda	2018	18	1	7.62028	99.874	236519	19.7336	72.7776	0.101752	0.225	0.221	1	61.25	52.4437	84.1435	57.8995	1.20183e+09	1201.83	17.211	19.2	0.796	2.43504	0.535657	9.6379e+09	9.98398	-0.348228	55.7841	1.74651	491.126	0.0491126	-1.30881	79.0028	1.89764	0.224
Rwanda	2019	18	1	7.02934	99.8879	931	19.5496	74.315	0.0569923	0.221	0.237	1	61.25	52.9639	84.7835	58.4729	1.2721e+09	1272.1	17.313	21.358	0.766	2.39079	0.521027	1.03493e+10	10.0149	-0.25774	57.9757	1.76325	525.573	0.0525573	-1.27937	77.1788	1.8875	0.228
Rwanda	2020	18	1	6.43829	99.9018	780506	19.3553	75.8419	0.0694565	0.203	0.233	1	61.25	53.4844	85.4254	59.0524	1.72183e+09	1721.83	17.432	23.8	0.763	2.39671	0.528033	1.01744e+10	10.0075	-0.152614	55.188	1.74184	496.898	0.0496898	-1.30373	79.392	1.89978	0.228
Rwanda	2021	18	1	5.8473	99.9157	550094	19.1505	77.3571	0.0719735	0.223	0.221	1	61.25	54.0051	86.0693	59.6381	1.33032e+09	1330.32	17.568	29.432	0.744	2.37175	0.573206	1.10693e+10	10.0441	-0.211896	54.6383	1.7375	471.355	0.0471355	-1.32665	81.2509	1.90983	0.227
Rwanda	2022	18	1	5.25657	99.9296	318041	19.3245	78.8595	0.0827525	0.19	0.217	1	61.25	54.526	86.7151	60.2302	1.12055e+09	1120.55	17.721	34.4405	0.729	2.3116	0.561203	1.33162e+10	10.1244	-0.305102	61.1451	1.78636	484.127	0.0484127	-1.31504	80.3214	1.90483	0.22
Ghana	2000	19	1	16.8059	100	344049	9.63151	5.72344	-0.359382	0.895	0.876	1	9	53.8908	80.3572	65.5172	881750000	881.75	43.929	0.153615	0.792	2.51244	-0.0959862	4.98285e+09	9.69748	-0.1659	116.048	2.06464	2116.77	0.211677	-0.674326	56.1023	1.74898	0.667
Ghana	2001	19	1	16.1357	100	33009	9.7538	5.81107	-0.259658	0.895	0.878	1	9	54.6735	80.6797	66.2725	1.04021e+09	1040.21	44.601	0.200008	0.8	2.66311	-0.219388	5.31487e+09	9.72549	-0.08932	110.046	2.04157	2073.12	0.207312	-0.683376	56.6847	1.75347	0.724
Ghana	2002	19	1	15.4739	100	7217207	9.67226	6.75046	-0.159934	0.912	0.878	1	9	55.5756	81.4429	67.287	1.06171e+09	1061.71	45.275	0.830284	0.801	2.75014	-0.34279	6.1662e+09	9.79002	-0.05893	97.4892	1.98896	1846.19	0.184619	-0.733724	57.3547	1.75857	0.733
Ghana	2003	19	1	14.8206	100	410198	9.58128	7.70862	0.0291866	0.912	0.878	1	9	56.4811	82.2097	68.3036	1.33076e+09	1330.76	45.951	1.19306	0.801	2.7	-0.311427	7.63272e+09	9.88268	-0.136751	97.2871	1.98806	1645.28	0.164528	-0.78376	55.3359	1.74301	0.733
Ghana	2004	19	1	14.1756	100	983944	9.48073	8.68541	0.040791	0.912	0.878	1	10.8696	57.3899	82.98	69.3226	1.70321e+09	1703.21	46.63	1.7168	0.816	2.64856	-0.279528	8.88142e+09	9.94848	-0.13927	99.6703	1.99857	1892.37	0.189237	-0.722994	52.1648	1.71738	0.736
Ghana	2005	19	1	13.5398	100	786466	9.37046	9.68015	0.169719	0.912	0.875	1	10.8696	58.3021	83.7539	70.3428	1.38173e+09	1381.73	47.308	1.8312	0.816	2.62276	-0.368746	1.07446e+10	10.0312	-0.14497	98.1715	1.99199	1893.72	0.189372	-0.722685	53.2635	1.72643	0.729
Ghana	2006	19	1	12.9125	100	4742923	9.25037	10.6929	0.00639619	0.912	0.875	1	10.8696	59.2177	84.5312	71.3652	1.43796e+09	1437.96	47.988	2.72318	0.816	2.59967	-0.0141816	2.0885e+10	10.3198	-0.63601	64.5191	1.80969	1794.28	0.179428	-0.74611	52.9304	1.72371	0.729
Ghana	2007	19	1	12.2941	74.85	161917	9.12034	11.7232	-0.0730613	0.912	0.883	1	10.8696	60.1367	85.312	72.3893	9.7888e+08	978.88	48.669	3.85	0.816	2.57743	0.0381477	2.48273e+10	10.3949	-1.38318	65.3543	1.81527	1649.77	0.164977	-0.782577	54.8134	1.73889	0.732
Ghana	2008	19	1	11.6844	75.8313	8493414	8.98025	12.7708	-0.029516	0.909	0.882	1	7.89474	61.0591	86.0964	73.4152	1.05607e+09	1056.07	49.351	4.27	0.801	2.53778	-0.0774585	2.86794e+10	10.4576	-2.71492	69.5142	1.84207	1899.83	0.189983	-0.721286	52.7589	1.7223	0.734
Ghana	2009	19	1	11.0842	76.8043	5366783	8.83007	13.835	0.0278358	0.913	0.878	1	9.38215	61.9848	86.8842	74.4422	1.42803e+09	1428.03	50.031	5.44	0.806	2.49528	-0.00998761	2.60487e+10	10.4158	-2.36564	71.5947	1.85488	2130.45	0.213045	-0.671529	54.1024	1.73322	0.755
Ghana	2010	19	1	10.4926	77.7692	223778	8.66959	14.9162	0.0260932	0.929	0.878	1	8.26087	62.9139	87.6756	75.4713	1.8213e+09	1821.3	50.713	7.8	0.807	2.43301	0.0142805	3.21977e+10	10.5078	-2.52735	75.3778	1.87724	2141.84	0.214184	-0.669214	54.4978	1.73638	0.763
Ghana	2011	19	1	9.91016	78.726	910752	8.49881	16.0135	0.167112	0.929	0.878	1	8.26087	63.8463	88.4704	76.5016	1.85882e+09	1858.82	51.394	9	0.805	2.40497	-0.0291263	3.93367e+10	10.5948	-3.22224	86.2955	1.93599	2627.78	0.262778	-0.58041	54.0909	1.73312	0.763
Ghana	2012	19	1	9.33709	79.6738	597638	8.31768	17.1267	0.130695	0.931	0.879	1	8.26087	64.7822	89.2688	77.5331	1.85792e+09	1857.92	52.073	10.6	0.817	2.41991	-0.126569	4.12717e+10	10.6157	-3.29343	93.168	1.96927	2631.04	0.263104	-0.579872	54.2777	1.73462	0.769
Ghana	2013	19	1	8.77363	80.6132	284533	8.12623	18.2551	0.0606061	0.922	0.9	1	10.9091	65.7214	90.0707	78.5652	1.35465e+09	1354.65	52.748	15	0.815	2.40928	-0.0965914	6.28246e+10	10.7981	-3.22633	60.7593	1.78361	2698.54	0.269854	-0.568871	54.7731	1.73857	0.757
Ghana	2014	19	1	8.21971	81.544	9714234	7.92444	19.3984	-0.106808	0.904	0.9	1	10.9091	66.6639	90.8761	79.5978	1.14512e+09	1145.12	53.419	19	0.81	2.36499	-0.194919	5.47833e+10	10.7386	-3.35699	63.8366	1.80507	2673.13	0.267313	-0.57298	54.3845	1.73548	0.745
Ghana	2015	19	1	7.67524	82.4662	6583223	7.71229	20.5563	-0.0382289	0.906	0.904	1	10.9091	67.6099	91.685	80.6312	2.01049e+09	2010.49	54.086	23	0.787	2.30713	-0.210319	4.9406e+10	10.6938	-2.97089	76.5213	1.88378	2847.02	0.284702	-0.545609	54.5641	1.73691	0.739
Ghana	2016	19	1	7.14014	83.3791	3452218	7.48975	21.7286	-0.138908	0.902	0.904	1	10.9091	68.5592	92.4974	81.6651	1.5033e+09	1503.3	54.749	28	0.805	2.27621	-0.175111	5.61649e+10	10.7495	-3.47067	67.877	1.83172	2815	0.2815	-0.550522	54.3111	1.73489	0.73
Ghana	2017	19	1	6.61447	84.2836	321693	7.25689	22.9148	0.082037	0.901	0.903	1	12.7273	69.5119	93.3134	82.6996	1.40915e+09	1409.15	55.407	37.8842	0.802	2.19536	-0.25357	6.04059e+10	10.7811	-3.23908	70.5484	1.84849	2757.96	0.275796	-0.559413	53.107	1.72515	0.742
Ghana	2018	19	1	6.09813	85.1791	7191663	7.0137	24.1145	-0.036643	0.896	0.903	1	12.7273	70.468	94.1328	83.7345	1.14705e+09	1147.05	56.06	43	0.804	2.07517	-0.138242	6.72989e+10	10.828	-2.90818	67.9585	1.83224	3112.29	0.311229	-0.50692	53.694	1.72993	0.743
Ghana	2019	19	1	5.59113	86.0653	4062533	6.76028	25.3274	0.118527	0.873	0.885	1	13.0909	71.4274	94.9558	84.7696	9.9186e+08	991.86	56.707	22.0732	0.805	2.00781	-0.108894	6.8338e+10	10.8347	-3.29207	76.8248	1.8855	3135.59	0.313559	-0.50368	54.8474	1.73916	0.725
Ghana	2020	19	1	5.09325	86.9418	933967	6.49655	26.5532	0.169902	0.888	0.894	1	13.0909	72.3902	95.7822	85.8053	2.33994e+09	2339.94	57.349	62.5176	0.824	1.99182	-0.12723	7.00431e+10	10.8454	-1.33337	66.5755	1.82331	3484.16	0.348416	-0.457902	55.393	1.74346	0.722
Ghana	2021	19	1	4.60449	87.8089	780629	6.22261	27.7916	0.0658525	0.864	0.891	1	14.5455	73.3564	96.6122	86.8413	1.23847e+09	1238.47	57.985	68.6	0.806	1.95905	-0.128527	7.95244e+10	10.9005	-2.41388	62.7078	1.79732	3483.36	0.348336	-0.458001	55.393	1.74346	0.661
Ghana	2022	19	1	4.07353	88.6664	6219747	5.93689	29.0423	-0.195025	0.893	0.874	1	14.5455	74.3259	97.4457	87.8776	1.07742e+09	1077.42	58.615	69.8405	0.823	1.92029	-0.0459955	7.42634e+10	10.8708	-1.47257	70.1155	1.84581	3483.76	0.348376	-0.457952	55.393	1.74346	0.664
Guatemala	2000	20	4	3.37499	99.6952	655998	0.468386	61.0672	-0.768334	0.754	0.827	1	8.84956	80.5695	95.8776	87.509	3.8155e+08	381.55	45.332	0.712333	0.602	2.37572	-0.83089	1.92889e+10	10.2853	-0.2299	49.1456	1.69148	4058.54	0.405854	-0.39163	44.4356	1.64773	0.549
Guatemala	2001	20	4	3.28557	99.6952	31686	0.501447	61.5617	-0.801314	0.754	0.827	1	8.84956	80.9366	95.9113	87.7753	3.5605e+08	356.05	45.668	1.7382	0.602	2.29722	-0.745456	1.84052e+10	10.2649	-0.455528	70.669	1.84923	4133.95	0.413395	-0.383635	45.0182	1.65339	0.549
Guatemala	2002	20	4	3.19685	99.6952	980118	0.534518	62.0451	-0.834293	0.754	0.827	1	8.84956	81.303	95.9449	88.039	3.9392e+08	393.92	46.005	3.39175	0.602	2.29188	-0.660022	2.04442e+10	10.3106	-0.110617	67.1048	1.82675	4082.94	0.408294	-0.389027	45.6008	1.65897	0.549
Guatemala	2003	20	4	3.11013	99.6952	648061	0.567696	62.5094	-0.774797	0.754	0.826	1	8.22785	81.6685	95.9786	88.2967	3.5153e+08	351.53	46.318	4.54885	0.602	2.25198	-0.737128	2.15764e+10	10.334	-0.131009	67.0023	1.82609	4382.8	0.43828	-0.358249	46.1833	1.66448	0.551
Guatemala	2004	20	4	3.02487	99.6952	319635	0.600978	62.9581	-0.808035	0.754	0.819	1	8.22785	82.0333	96.0122	88.5497	2.9316e+08	293.16	46.616	5.1	0.609	2.22294	-0.619751	2.35773e+10	10.3725	-0.2548	70.2149	1.84643	4045.3	0.40453	-0.39305	44.0743	1.64419	0.564
Guatemala	2005	20	4	2.94032	99.6952	9934998	0.63431	63.396	-0.835618	0.754	0.819	1	8.22785	82.3972	96.0457	88.8001	3.2451e+08	324.51	46.913	5.7	0.609	2.16441	-0.684204	2.67834e+10	10.4279	-0.4702	67.1037	1.82675	4087.14	0.408714	-0.38858	42.5719	1.62912	0.564
Guatemala	2006	20	4	2.85644	99.6952	669562	0.667678	63.8234	-0.735239	0.754	0.819	1	8.22785	82.7603	96.0793	89.0482	5.7468e+08	574.68	47.21	6.5	0.61	2.11559	-0.837903	2.97442e+10	10.4734	-0.5518	67.9119	1.83195	4242.91	0.424291	-0.372336	40.2711	1.60499	0.564
Guatemala	2007	20	4	2.77318	86.969	3477416	0.701068	64.2408	-0.753425	0.749	0.823	1	12.0253	83.1227	96.1128	89.294	4.8339e+08	483.39	47.508	7.3	0.631	2.10656	-0.769334	3.35679e+10	10.5259	-0.7197	69.0014	1.83886	4454.02	0.445402	-0.351247	41.508	1.61813	0.573
Guatemala	2008	20	4	2.69053	87.3976	28053	0.734468	64.6483	-0.713972	0.754	0.831	1	12.0253	83.4842	96.1462	89.5375	5.2977e+08	529.77	47.807	8.3	0.637	2.05272	-0.666637	3.85037e+10	10.5855	-0.720574	65.1787	1.81411	4052.93	0.405293	-0.39223	41.3774	1.61676	0.588
Guatemala	2009	20	4	2.60864	87.823	7107167	0.767895	65.0451	-0.925673	0.757	0.831	1	12.0253	83.8449	96.1797	89.7784	3.9729e+08	397.29	48.104	9.3	0.634	1.99246	-0.533482	3.71261e+10	10.5697	-0.491317	58.0407	1.76373	4154.52	0.415452	-0.381479	40.7764	1.61041	0.591
Guatemala	2010	20	4	2.52733	88.2418	395446	0.801307	65.4326	-0.852924	0.757	0.831	1	12.0253	84.2048	96.2131	90.0172	4.2345e+08	423.45	48.403	10.5	0.634	1.98156	-0.540784	4.06766e+10	10.6093	-0.607979	63.1252	1.8002	4004.35	0.400435	-0.397468	40.2874	1.60517	0.591
Guatemala	2011	20	4	2.44673	88.6555	82449	0.834721	65.8098	-0.744141	0.757	0.831	1	13.2911	84.5639	96.2465	90.2534	3.608e+08	360.8	48.701	12.3	0.64	1.99386	-0.537248	4.6876e+10	10.671	-1.13957	65.0471	1.81323	4004.56	0.400456	-0.397446	40.0784	1.60291	0.591
Guatemala	2012	20	4	2.36675	89.0662	7715983	0.86811	66.1775	-0.63382	0.758	0.825	1	13.2911	84.9222	96.2798	90.4874	3.2067e+08	320.67	49	16	0.648	1.99139	-0.678763	4.95939e+10	10.6954	-1.22624	61.9594	1.79211	4204.25	0.420425	-0.376311	39.776	1.59962	0.582
Guatemala	2013	20	4	2.28695	89.474	462306	0.901331	66.5389	-0.674156	0.77	0.815	1	13.2911	85.2796	96.3132	90.7204	514000000	514	49.311	19.7	0.668	1.9536	-0.639011	5.29964e+10	10.7242	-1.44886	56.6852	1.75347	4409.62	0.440962	-0.355599	39.4084	1.59559	0.582
Guatemala	2014	20	4	2.20738	89.8791	1547046	0.934346	66.8937	-0.655564	0.757	0.815	1	13.2911	85.6363	96.3465	90.9522	2.9479e+08	294.79	49.634	23.4	0.671	1.89511	-0.756131	5.78522e+10	10.7623	-1.38774	55.0833	1.74102	4562.1	0.45621	-0.340835	39.986	1.60191	0.585
Guatemala	2015	20	4	2.12798	90.2814	848836	0.967089	67.2425	-0.654438	0.765	0.822	1	13.924	85.9922	96.3797	91.1829	4.6862e+08	468.62	49.971	28.8059	0.679	1.83251	-0.780903	6.21861e+10	10.7937	-1.04809	49.8935	1.69804	5002.62	0.500262	-0.300802	41.6573	1.61969	0.601
Guatemala	2016	20	4	2.04893	90.6806	5449815	0.99956	67.5844	-0.545004	0.774	0.836	1	13.924	86.3472	96.413	91.4122	3.0323e+08	303.23	50.319	34.5093	0.674	1.84256	-0.790915	6.60534e+10	10.8199	-0.965023	46.3727	1.66626	5357.7	0.53577	-0.271022	41.9354	1.62258	0.628
Guatemala	2017	20	4	1.97019	91.0772	2431836	1.03169	67.9199	-0.651365	0.778	0.835	1	12.6582	86.7015	96.4462	91.6401	4.0802e+08	408.02	50.68	37.9	0.691	1.81876	-0.787172	7.16538e+10	10.8552	-0.934017	46.0694	1.66341	5708.09	0.570809	-0.243509	42.2135	1.62545	0.626
Guatemala	2018	20	4	1.89179	91.4708	9435868	1.03198	68.2489	-0.538147	0.718	0.838	1	12.6582	87.0549	96.4794	91.8665	4.2917e+08	429.17	51.054	41.5	0.697	1.66602	-0.821695	7.33284e+10	10.8653	-0.780134	47.0117	1.67221	5774.42	0.577442	-0.238492	42.4916	1.6283	0.601
Guatemala	2019	20	4	1.81386	91.8616	6464102	1.03202	68.571	-0.577341	0.732	0.859	1	19.375	87.4076	96.5125	92.0911	4.2038e+08	420.38	51.439	44.401	0.699	1.52063	-0.915392	7.71723e+10	10.8875	-0.796287	45.5167	1.65817	5851.73	0.585174	-0.232715	42.7697	1.63114	0.607
Guatemala	2020	20	4	1.7364	92.2507	3517344	1.03177	68.8863	-0.415829	0.749	0.836	1	19.375	87.7594	96.5456	92.3138	5.0066e+08	500.66	51.836	47.5123	0.705	1.47138	-1.134	7.77152e+10	10.8905	-0.78262	41.143	1.6143	5734.48	0.573448	-0.241506	43.0384	1.63386	0.595
Guatemala	2021	20	4	1.65944	92.6379	596929	1.03125	69.4622	-0.395518	0.703	0.797	1	19.375	88.1104	96.5787	92.5347	5.1255e+08	512.55	52.245	50.8416	0.702	1.38076	-1.19214	8.60531e+10	10.9348	-2.98559	49.4915	1.69453	5712.12	0.571212	-0.243203	43.0384	1.63386	0.554
Guatemala	2022	20	4	1.58303	93.0232	7704272	1.03044	70.0349	-0.262851	0.643	0.737	1	19.375	88.4606	96.6118	92.7535	4.3703e+08	437.03	52.666	54.4043	0.703	1.40624	-1.20975	9.50033e+10	10.9777	-0.718761	54.67	1.73775	5723.3	0.57233	-0.242354	43.0384	1.63386	0.507
Guinée	2000	21	1	16.7038	93.4061	164854	14.1111	9.16231	-1.90759	0.543	0.417	1	8.77193	38.3266	75.3433	49.7533	2.3658e+08	236.58	30.869	0.0954249	0.357	1.96314	-1.05016	4.36746e+09	9.64023	-0.009942	36.6797	1.56443	933.223	0.0933223	-1.03001	57.2969	1.75813	0.268
Guinée	2001	21	1	16.2813	93.7866	681852	14.3092	9.88629	-1.66438	0.575	0.417	1	8.77193	39.0914	75.7349	50.5036	4.6388e+08	463.88	31.144	0.175542	0.357	1.296	-0.908607	4.12553e+09	9.61548	-0.001677	40.1879	1.6041	1009.31	0.100931	-0.995976	57.301	1.75816	0.272
Guinée	2002	21	1	15.8612	94.1646	198685	14.5062	10.6114	-1.42117	0.569	0.407	1	8.77193	39.8562	76.1264	51.2523	3.9194e+08	391.94	31.42	0.402023	0.439	1.55169	-0.767054	4.30161e+09	9.63363	-0.03	38.0284	1.58011	1035.37	0.103537	-0.984903	57.3458	1.7585	0.271
Guinée	2003	21	1	15.4434	94.5397	715258	14.702	11.3379	-0.788895	0.59	0.408	1	19.2982	40.621	76.518	51.9996	3.3914e+08	339.14	31.698	0.45096	0.439	2.24175	-0.888901	5.02517e+09	9.70115	-0.078966	35.0751	1.545	983.643	0.0983643	-1.00716	57.4312	1.75915	0.276
Guinée	2004	21	1	15.0281	94.9119	23167	14.8966	12.2069	-1.03338	0.575	0.413	1	19.2982	41.3858	76.9096	52.7452	3.4126e+08	341.26	31.977	0.508819	0.439	2.12924	-0.887607	5.30077e+09	9.72434	-0.054483	34.5951	1.53901	1041.27	0.104127	-0.982438	57.476	1.75949	0.271
Guinée	2005	21	1	14.6153	95.2809	747921	15.0901	13.095	-1.15398	0.575	0.413	1	19.2982	42.1506	77.3011	53.4891	2.3781e+08	237.81	32.257	0.542254	0.439	1.97867	-1.07331	4.28247e+09	9.63169	-0.105	47.9377	1.68068	1031.74	0.103174	-0.98643	57.4678	1.75942	0.271
Guinée	2006	21	1	14.2049	95.6465	263905	15.2825	14.0026	-1.90893	0.575	0.401	1	19.2982	42.9154	77.6927	54.2316	2.0583e+08	205.83	32.539	0.637492	0.447	2.06291	-1.12154	4.22002e+09	9.62531	-0.125	69.3863	1.84127	1027.69	0.102769	-0.988137	57.5045	1.7597	0.269
Guinée	2007	21	1	13.797	64.1313	779728	15.4737	14.9295	-2.40335	0.575	0.401	1	19.2982	43.6802	78.0843	54.9723	2.228e+08	222.8	32.822	0.780025	0.449	2.29336	-1.29245	6.28192e+09	9.79809	-0.3859	71.121	1.852	1066.26	0.106626	-0.972136	57.708	1.76124	0.269
Guinée	2008	21	1	13.3918	65.0369	295392	15.6637	15.8756	-2.09734	0.558	0.423	1	19.2982	44.445	78.4759	55.7112	3.2508e+08	325.08	33.106	0.92	0.309	2.40819	-1.21101	6.96418e+09	9.84287	-0.31824	64.1843	1.80743	1051.05	0.105105	-0.978376	57.9521	1.76307	0.266
Guinée	2009	21	1	12.9891	65.9402	810896	15.8525	16.841	-2.11646	0.594	0.291	1	19.2982	45.2098	78.8674	56.4484	2.5044e+08	250.44	33.391	0.94	0.306	2.43976	-1.09628	6.7169e+09	9.82717	-0.14085	69.8154	1.84395	1076.7	0.10767	-0.967904	57.9928	1.76337	0.174
Guinée	2010	21	1	12.5889	66.8414	326127	16.0402	17.8259	-1.68708	0.701	0.521	1	19.2982	45.9746	79.259	57.1841	2.3269e+08	232.69	33.678	1	0.342	2.45828	-1.22194	6.85347e+09	9.83591	-0.10135	73.5466	1.86656	1202.38	0.120238	-0.919959	58.1963	1.7649	0.234
Guinée	2011	21	1	12.1914	67.7403	841195	15.7856	18.8301	-1.38805	0.717	0.574	1	19.2982	47.0924	80.2665	58.3603	2.0188e+08	201.88	33.966	2	0.342	2.47131	-1.12737	6.78514e+09	9.83156	-0.95524	85.9547	1.93427	1194.91	0.119491	-0.922663	58.1963	1.7649	0.313
Guinée	2012	21	1	11.7965	68.6368	356107	15.5192	19.8536	-1.28701	0.726	0.574	1	19.2982	48.2218	81.28	59.5459	649750000	649.75	34.255	3.1	0.342	2.44875	-1.05566	7.63805e+09	9.88298	-0.60355	86.6743	1.93789	1131.16	0.113116	-0.946478	58.6033	1.76792	0.315
Guinée	2013	21	1	11.4042	69.5312	870853	15.2411	20.8964	-1.22985	0.684	0.625	1	19.2982	49.3628	82.2996	60.7408	4.6839e+08	468.39	34.545	4.5	0.343	2.44232	-1.04976	8.37661e+09	9.92307	-0.00106	80.4264	1.9054	982.067	0.0982067	-1.00786	59.0103	1.77093	0.317
Guinée	2014	21	1	11.0147	70.4232	385438	14.9511	21.9585	-0.955243	0.688	0.607	1	21.9298	50.5153	83.3253	61.945	5.6885e+08	568.85	34.836	6.4	0.353	2.48293	-1.06706	8.77847e+09	9.94342	0.0770574	76.772	1.8852	990.091	0.0990091	-1.00432	59.1446	1.77191	0.369
Guinée	2015	21	1	10.6258	71.3128	898439	14.6485	23.043	-0.386475	0.681	0.598	1	21.9298	51.6793	84.357	63.1626	6.1584e+08	615.84	35.141	9.2	0.484	2.54928	-1.01426	8.7942e+09	9.9442	-0.0482573	72.4427	1.85999	1171.23	0.117123	-0.931357	59.1934	1.77227	0.368
Guinée	2016	21	1	10.2377	72.2	409848	14.3332	24.1498	-0.396071	0.687	0.585	1	21.9298	52.8549	85.3947	64.3935	6.4322e+08	643.22	35.46	13.1	0.487	2.5895	-0.94654	8.59596e+09	9.93429	-1.59734	111.839	2.0486	1285.75	0.128575	-0.890844	59.2748	1.77287	0.371
Guinée	2017	21	1	9.85077	73.0849	919672	14.0049	25.2793	-0.699074	0.671	0.585	1	21.9298	54.0421	86.4385	65.6378	5.2474e+08	524.74	35.793	18.7	0.491	2.56349	-1.038	1.03247e+10	10.0139	-0.57648	101.252	2.0054	1261.21	0.126121	-0.899213	59.3969	1.77376	0.362
Guinée	2018	21	1	9.46508	73.9674	4278965	13.6636	26.4315	-0.880597	0.693	0.579	1	21.9298	55.2408	87.4884	66.8951	6.983e+08	698.3	36.14	21.83	0.507	2.53344	-1.05975	1.1857e+10	10.074	-0.35309	88.9841	1.94931	1122.1	0.11221	-0.949969	59.5068	1.77457	0.362
Guinée	2019	21	1	9.08101	74.8474	934633	13.3091	27.6064	-0.842606	0.693	0.532	1	22.807	56.4511	88.5443	68.1651	6.1165e+08	611.65	36.5	23.3663	0.488	2.53765	-0.915901	1.34429e+10	10.1285	-0.04338	78.4153	1.8944	1201.79	0.120179	-0.920171	59.5393	1.7748	0.352
Guinée	2020	21	1	8.69848	75.7249	439654	12.9412	28.8045	-0.669285	0.561	0.449	1	16.6667	57.6729	89.6063	69.4484	7.6911e+08	769.11	36.875	29.3934	0.463	2.51225	-0.974657	1.41778e+10	10.1516	-0.17399	115.037	2.06084	1356.66	0.135666	-0.867529	59.5597	1.77495	0.299
Guinée	2021	21	1	8.31785	76.5999	943074	12.5599	30.0258	-0.93991	0.561	0.416	1	19.7368	58.9063	90.6743	70.7444	5.9209e+08	592.09	37.264	31.311	0.374	2.44432	-1.02239	1.60918e+10	10.2066	-0.20073	105.803	2.0245	1281.53	0.128153	-0.892273	59.5719	1.77504	0.258
Guinée	2022	21	1	7.9392	77.4758	444766	12.1648	31.2707	-0.838682	0.561	0.334	1	29.6296	60.1513	91.7484	72.0533	5.2571e+08	525.71	37.668	33.923	0.371	2.39091	-1.00541	2.09992e+10	10.3222	-0.6501	107.478	2.03132	1319.09	0.131909	-0.879725	59.5658	1.775	0.186
Guinée Bissau	2000	22	1	2.62155	78.3524	75407	2.32476	4.53446	-0.34945	0.583	0.635	1	7.84314	42.6906	77.1501	55.1797	1.4108e+08	141.08	36.243	0.230103	0.593	2.00021	-0.915325	3.91346e+08	8.59256	-0.00165819	52.7373	1.72212	809.855	0.0809855	-1.09159	23.5818	1.37258	0.432
Guinée Bissau	2001	22	1	2.5335	79.2296	92474	2.78527	5.01575	-0.537804	0.599	0.635	1	7.84314	43.2648	77.0443	55.6355	1.0802e+08	108.02	36.622	0.299569	0.594	2.1326	-0.97977	4.12611e+08	8.61554	-0.000791227	47.5832	1.67745	807.337	0.0807337	-1.09294	23.8821	1.37807	0.439
Guinée Bissau	2002	22	1	2.446	80.107	96115	3.25916	5.7291	-0.726157	0.613	0.643	1	7.84314	43.8287	76.9278	56.0767	9.819e+07	98.19	37.004	1.02299	0.629	2.2256	-1.04421	4.66774e+08	8.66911	-0.00252515	39.6761	1.59853	806.625	0.0806625	-1.09333	24.1824	1.3835	0.444
Guinée Bissau	2003	22	1	2.3591	80.9844	268806	3.74649	6.75417	-0.494184	0.627	0.679	1	7.84314	44.3822	76.8007	56.5025	1.9802e+08	198.02	37.387	1.3542	0.589	2.30469	-1.12733	5.53615e+08	8.74321	-0.00348933	38.0335	1.58017	916.409	0.0916409	-1.03791	24.4828	1.38886	0.376
Guinée Bissau	2004	22	1	2.27279	81.8619	442535	4.24726	7.78216	-0.378061	0.622	0.675	1	14	44.9254	76.663	56.9133	9.63e+07	96.3	37.772	1.80814	0.59	2.35535	-1.27455	5.8217e+08	8.76505	-0.00922798	43.1921	1.6354	926.119	0.0926119	-1.03333	24.7831	1.39416	0.376
Guinée Bissau	2005	22	1	2.18712	82.7391	617886	4.7615	8.87835	-0.562526	0.632	0.677	1	14	45.4583	76.5145	57.3084	8.089e+07	80.89	38.157	1.90137	0.674	2.39889	-1.17498	6.39776e+08	8.80603	-0.00799669	45.7842	1.66072	915.815	0.0915815	-1.03819	25.0834	1.39939	0.458
Guinée Bissau	2006	22	1	2.10201	83.616	794	5.28923	9.98973	-0.494073	0.633	0.68	1	14	45.9808	76.3554	57.6887	1.0302e+08	103.02	38.545	2.0572	0.675	2.46114	-1.09548	6.34782e+08	8.80262	-0.0172197	48.7605	1.68807	913.918	0.0913918	-1.03909	25.3837	1.40456	0.452
Guinée Bissau	2007	22	1	2.01753	57.6244	97146	5.83047	11.1162	-0.460554	0.633	0.68	1	14	46.493	76.1856	58.0535	1.1502e+08	115.02	38.934	2.2063	0.673	2.5471	-1.20495	7.53163e+08	8.87689	-0.0185601	46.2445	1.66506	946.612	0.0946612	-1.02383	25.684	1.40966	0.452
Guinée Bissau	2008	22	1	1.93365	58.5418	149998	6.38525	12.2581	-0.709456	0.634	0.679	1	10	46.9948	76.0052	58.4032	1.152e+08	115.2	39.325	2.35489	0.632	2.57646	-1.2004	9.52668e+08	8.97894	-0.00597007	45.1389	1.65455	898.468	0.0898468	-1.0465	25.9844	1.41471	0.407
Guinée Bissau	2009	22	1	1.85042	59.4579	33019	6.95355	13.4153	-0.665871	0.631	0.678	1	12	47.4863	75.8141	58.737	1.3453e+08	134.53	39.716	2.30328	0.652	2.57108	-1.21717	8.90168e+08	8.94947	-0.0175402	43.5957	1.63944	907.23	0.090723	-1.04228	26.2847	1.4197	0.453
Guinée Bissau	2010	22	1	1.76775	60.3721	510902	7.53549	14.5887	-0.690954	0.636	0.687	1	10	47.9675	75.6124	59.0561	1.3294e+08	132.94	40.111	2.45	0.652	2.587	-1.16156	9.40113e+08	8.97318	-0.0277102	43.5146	1.63863	907.236	0.0907236	-1.04228	26.585	1.42464	0.45
Guinée Bissau	2011	22	1	1.6857	61.2847	692734	8.13104	15.7782	-0.753626	0.636	0.687	1	10	48.4383	75.4	59.3599	1.1699e+08	116.99	40.508	2.672	0.652	2.63201	-1.18605	1.15707e+09	9.06336	-0.0241658	48.6175	1.68679	896.623	0.0896623	-1.04739	26.8853	1.42951	0.447
Guinée Bissau	2012	22	1	1.60424	62.195	875408	8.74028	16.9842	-0.965296	0.622	0.667	1	14	48.8988	75.1769	59.6486	8.312e+07	83.12	40.908	2.89399	0.638	2.67972	-1.29329	1.04941e+09	9.02095	-0.00677378	44.1281	1.64471	890.101	0.0890101	-1.05056	27.1856	1.43434	0.329
Guinée Bissau	2013	22	1	1.52342	63.104	59223	9.3632	18.2068	-0.899928	0.667	0.639	1	14	49.349	74.9431	59.9219	1.0724e+08	107.24	41.31	3.1	0.69	2.6885	-1.34157	1.10968e+09	9.0452	-0.0196379	39.9575	1.6016	886.973	0.0886973	-1.05209	27.4858	1.43911	0.289
Guinée Bissau	2014	22	1	1.4432	64.011	243925	9.99987	19.4463	-0.706452	0.666	0.725	1	13.7255	49.7888	74.6987	60.18	1.1096e+08	110.96	41.715	3.32	0.717	2.64794	-1.55671	1.13525e+09	9.05509	-0.0261054	46.8697	1.67089	907.577	0.0907577	-1.04212	27.7861	1.44383	0.443
Guinée Bissau	2015	22	1	1.3636	64.9163	429522	10.6503	20.703	-0.516579	0.666	0.759	1	13.7255	50.2183	74.4437	60.4227	1.0928e+08	109.28	42.123	6.1	0.717	2.58265	-1.50964	1.15238e+09	9.0616	-0.01623	54.3704	1.73536	914.877	0.0914877	-1.03864	28.0864	1.4485	0.499
Guinée Bissau	2016	22	1	1.28465	65.8194	616306	11.3146	21.9769	-0.445276	0.668	0.759	1	13.7255	50.6374	74.1779	60.6499	2.2311e+08	223.11	42.533	13.8	0.717	2.51888	-1.58633	1.24507e+09	9.0952	-0.0235482	54.3007	1.73481	928.796	0.0928796	-1.03208	28.3866	1.45311	0.5
Guinée Bissau	2017	22	1	1.20635	66.7213	804296	11.9926	23.2683	-0.497683	0.627	0.77	1	13.7255	51.0462	73.9015	60.8614	1.2637e+08	126.37	42.945	14.8	0.708	2.43789	-1.59747	1.46998e+09	9.16731	-0.0153571	56.9137	1.75522	733.632	0.0733632	-1.13452	28.6867	1.45768	0.497
Guinée Bissau	2018	22	1	1.12869	67.6216	993225	12.6846	24.5776	-0.68482	0.645	0.762	1	13.7255	51.4447	73.6145	61.0575	1.6415e+08	164.15	43.36	15.7	0.718	2.37234	-1.55884	1.55413e+09	9.19149	-0.0209691	55.0196	1.74052	719.81	0.071981	-1.14278	28.9868	1.4622	0.51
Guinée Bissau	2019	22	1	1.05169	68.5203	183393	13.3904	25.9048	-0.561567	0.644	0.746	1	13.7255	51.8328	73.3168	61.2378	1.2296e+08	122.96	43.777	22.9201	0.719	2.33629	-1.49795	1.48648e+09	9.17216	-0.0712689	56.9639	1.7556	703.127	0.0703127	-1.15297	28.9868	1.4622	0.526
Guinée Bissau	2020	22	1	0.97536	69.4174	374802	14.1102	27.2502	-0.721676	0.66	0.747	1	13.7255	52.2106	73.0084	61.4024	1.5608e+08	156.08	44.196	28.1686	0.694	2.27645	-1.36314	1.52048e+09	9.18198	-0.0206754	54.8025	1.7388	656.342	0.0656343	-1.18287	28.9868	1.4622	0.535
Guinée Bissau	2021	22	1	0.8997	70.3129	567463	14.8439	28.614	-0.279986	0.667	0.747	1	13.7255	52.578	72.6893	61.5511	1.691e+08	169.1	44.617	28.5397	0.698	2.20259	-1.31993	1.72456e+09	9.23668	-0.017583	55.5513	1.74469	677.328	0.0677328	-1.1692	28.9868	1.4622	0.536
Guinée Bissau	2022	22	1	0.893809	71.2069	458265	14.8718	28.7229	-0.385945	0.628	0.747	1	13.7255	52.578	72.6893	61.6364	1.5616e+08	156.16	45.041	31.567	0.575	2.15284	-1.18539	1.71417e+09	9.23405	-0.0211229	51.4196	1.71113	666.835	0.0666835	-1.17598	28.9868	1.4622	0.377
Haiti	2000	23	4	16.005	96.1959	798449	6.95723	19.4402	-0.628624	0.751	0.659	1	3.61446	37.6169	84.7359	54.3913	2.8602e+08	286.02	35.6	0.231271	0.441	1.84581	-1.20163	6.81357e+09	9.83337	-0.01325	27.1535	1.43383	836.08	0.083608	-1.07775	61.3208	1.78761	0.436
Haiti	2001	23	4	14.718	96.5732	14237	7.07888	20.1252	-0.942241	0.743	0.639	1	3.61446	38.3619	84.737	55.6371	2.7205e+08	272.05	37.251	0.340832	0.443	1.82315	-1.3539	6.33197e+09	9.80154	-0.0044	27.5699	1.44044	893.391	0.0893391	-1.04896	60.5951	1.78244	0.41
Haiti	2002	23	4	13.4612	96.9507	449451	7.19904	20.8026	-1.25586	0.747	0.617	1	3.61446	39.1001	84.7374	56.869	2.3491e+08	234.91	38.935	0.893433	0.443	1.77837	-1.50618	6.20585e+09	9.7928	-0.0057	24.9397	1.39689	961.624	0.0961624	-1.01699	60.5951	1.78244	0.406
Haiti	2003	23	4	12.2368	97.3284	720493	7.31794	21.4706	-1.31542	0.728	0.617	1	3.61446	39.8315	84.7372	58.0834	2.6471e+08	264.71	40.645	1.64736	0.44	1.75356	-1.58486	5.07195e+09	9.70517	-0.0138	37.1973	1.57051	874.446	0.0874446	-1.05827	60.5951	1.78244	0.404
Haiti	2004	23	4	11.1416	97.6869	129763	7.47119	21.9996	-1.98454	0.727	0.577	1	3.61446	40.5562	84.7363	58.97	3.6888e+08	368.88	41.679	5.40126	0.411	1.70179	-1.46018	6.08736e+09	9.78443	-0.0059	33.781	1.52867	990.221	0.0990221	-1.00427	60.5951	1.78244	0.244
Haiti	2005	23	4	10.078	98.008	540094	7.62885	22.5049	-1.8044	0.801	0.609	1	3.61446	41.2741	84.7347	59.8048	4.7321e+08	473.21	42.638	6.3762	0.403	1.68059	-1.39128	7.03015e+09	9.84696	-0.026	34.9651	1.54363	1015.82	0.101582	-0.993183	64.2235	1.80769	0.238
Haiti	2006	23	4	9.03429	98.3284	931602	7.78673	23.0018	-1.39154	0.795	0.673	1	2.04082	41.9852	84.7325	60.6247	6.5234e+08	652.34	43.604	6.796	0.41	1.69925	-1.32642	7.63874e+09	9.88302	-0.1606	37.0571	1.56887	1022.49	0.102249	-0.990341	64.2235	1.80769	0.368
Haiti	2007	23	4	8.0109	63.1965	304916	7.94493	23.4895	-1.31973	0.844	0.696	1	4.08163	42.6896	84.7296	61.4285	6.6863e+08	668.63	44.574	7.2	0.448	1.68627	-1.29074	9.22864e+09	9.96514	-0.0745	34.2825	1.53507	1084.66	0.108466	-0.964706	64.2235	1.80769	0.453
Haiti	2008	23	4	7.00769	64.1396	659088	8.10324	23.9683	-1.3831	0.847	0.696	1	4.08163	43.3872	84.7261	62.2175	8.7238e+08	872.38	45.551	7.6	0.456	1.66611	-1.21559	1.0433e+10	10.0184	-0.0298	36.145	1.55805	1075.17	0.107517	-0.968521	64.2235	1.80769	0.455
Haiti	2009	23	4	6.02548	65.0893	995975	8.26197	24.4367	-0.95743	0.847	0.669	1	4.08163	44.078	84.7219	62.9888	1.04154e+09	1041.54	46.528	8.1	0.456	1.65253	-1.09507	1.1597e+10	10.0643	-0.05547	33.0965	1.51978	1005.78	0.100578	-0.997498	65.9046	1.81892	0.444
Haiti	2010	23	4	5.06397	66.0427	314377	8.42086	24.8953	-0.940315	0.841	0.664	1	11.1111	44.7621	84.717	63.7443	3.18462e+09	3184.62	47.509	8.37	0.449	1.16673	-1.18932	1.18593e+10	10.0741	-0.178	44.7215	1.65052	922.152	0.0922152	-1.0352	71.9884	1.85726	0.443
Haiti	2011	23	4	4.12342	66.7287	614803	8.57997	25.3436	-0.990168	0.84	0.692	1	4.21053	45.4394	84.7115	64.4832	1.59853e+09	1598.53	48.492	9	0.453	1.13206	-1.2377	1.30087e+10	10.1142	-0.119	44.1636	1.64506	958.598	0.0958598	-1.01836	72.8955	1.8627	0.419
Haiti	2012	23	4	3.2039	67.3819	897203	8.73924	25.7813	-0.788093	0.814	0.701	1	4.21053	46.1099	84.7053	65.2058	1.35901e+09	1359.01	49.477	9.8	0.453	1.54989	-1.24063	1.37089e+10	10.137	-0.156	40.2582	1.60485	1037.84	0.103784	-0.98387	73.4398	1.86593	0.43
Haiti	2013	23	4	2.30562	68.0341	162844	8.89885	26.2077	-0.631015	0.798	0.701	1	4.21053	46.7737	84.6985	65.9106	1.21988e+09	1219.88	50.46	10.6	0.443	1.50397	-1.13521	1.49025e+10	10.1733	-0.161919	40.3325	1.60566	1075.78	0.107578	-0.968278	75.0363	1.87527	0.424
Haiti	2014	23	4	1.42844	68.6842	410751	9.05857	26.6231	-0.643627	0.798	0.701	1	4.21053	47.4307	84.691	66.5989	1.13158e+09	1131.58	51.444	11.4	0.443	1.46513	-1.23923	1.51469e+10	10.1803	-0.099	42.3515	1.62687	1142.45	0.114245	-0.942165	75.0363	1.87527	0.424
Haiti	2015	23	4	0.736188	69.3332	47784	9.21849	27.027	-0.671565	0.786	0.703	1	4.21053	48.081	84.6828	67.2702	1.19391e+09	1193.91	52.427	14.2	0.433	1.43574	-1.2584	1.48496e+10	10.1717	-0.10568	41.9457	1.62269	1284.61	0.128461	-0.891228	75.0363	1.87527	0.408
Haiti	2016	23	4	0.0731681	69.9785	524517	9.3793	27.4176	-0.745547	0.81	0.706	1	4.21053	48.7244	84.674	67.9201	1.22108e+09	1221.08	53.396	22.8	0.433	1.39863	-1.35418	1.40693e+10	10.1483	-0.1049	41.4109	1.61711	1314.94	0.131494	-0.881095	75.0363	1.87527	0.396
Haiti	2017	23	4	0.404678	70.6217	991894	9.54128	27.7941	-0.676077	0.784	0.704	1	2.54237	49.3611	84.6645	68.5471	1.09499e+09	1094.99	54.346	27.2	0.401	1.36161	-1.25929	1.50934e+10	10.1788	-0.37486	42.0745	1.62402	1287.26	0.128726	-0.890332	72.9318	1.86292	0.404
Haiti	2018	23	4	0.238923	71.2618	396187	9.70437	28.1568	-0.640142	0.797	0.732	1	2.54237	49.9911	84.6544	69.1523	1.09385e+09	1093.85	55.278	32.4736	0.404	1.32791	-1.2855	1.64039e+10	10.2149	-0.105	45.1386	1.65455	1325.53	0.132553	-0.87761	72.3875	1.85966	0.41
Haiti	2019	23	4	0.3218	71.8989	810457	9.86856	28.5058	-0.887637	0.791	0.697	1	2.54237	50.6143	84.6436	69.736	7.558e+08	755.8	56.192	39.262	0.417	1.29424	-1.34681	1.50161e+10	10.1766	-0.075	44.5687	1.64903	1184.35	0.118435	-0.926521	64.9492	1.81257	0.4
Haiti	2020	23	4	0.280362	72.5315	490147	9.81454	28.6576	-1.02749	0.732	0.618	1	2.54237	51.4411	84.8053	70.4881	9.4224e+08	942.24	57.088	36.3947	0.392	1.2411	-1.34641	1.45082e+10	10.1616	-0.025	34.4572	1.53728	977.081	0.0977081	-1.01007	64.9492	1.81257	0.376
Haiti	2021	23	4	0.301081	73.1608	176989	9.76174	28.7933	-1.12813	0.705	0.627	1	2.54237	52.268	84.9671	71.2217	9.5148e+08	951.48	57.964	38.945	0.366	1.15604	-1.44136	2.08774e+10	10.3197	-0.051299	37.1654	1.57014	1030.88	0.103088	-0.986792	65.1306	1.81379	0.319
Haiti	2022	23	4	0.290721	73.786	870981	9.71013	28.9133	-1.4192	0.706	0.505	1	2.54237	53.0949	85.1288	71.9372	8.9549e+08	895.49	58.82	37.6699	0.316	1.1279	-1.45904	2.02536e+10	10.3065	-0.0394132	36.5296	1.56264	1003.98	0.100398	-0.998274	65.0399	1.81318	0.217
Indonesie	2000	24	7	3.83873	94.0101	28613	0.590319	41.5832	-1.9952	0.847	0.805	1	8	65.645	89.7643	75.7756	2.05781e+09	2057.81	42.002	0.925564	0.687	1.43244	-0.908694	1.65021e+11	11.2175	4.55036	71.4369	1.85392	5435.16	0.543516	-0.264788	25.1273	1.40015	0.685
Indonesie	2001	24	7	3.67418	94.5999	468607	0.597895	43.5343	-1.78922	0.847	0.805	1	8	66.7474	90.1858	76.7751	1.93809e+09	1938.09	42.783	2.01861	0.687	1.38802	-1.023	1.60447e+11	11.2053	2.97739	69.7932	1.84381	5740.15	0.574015	-0.241077	25.9252	1.41372	0.685
Indonesie	2002	24	7	3.51199	95.1853	658167	0.605394	45.5011	-1.58324	0.847	0.805	1	8	67.8499	90.6073	77.7648	1.82261e+09	1822.61	43.568	2.13414	0.698	1.35573	-1.1373	1.95661e+11	11.2915	-0.145086	59.0795	1.77144	5816.89	0.581689	-0.23531	26.6043	1.42495	0.685
Indonesie	2003	24	7	3.35222	95.766	85504	0.612815	47.4821	-2.09539	0.847	0.805	1	8	68.9523	91.0288	78.7446	2.0249e+09	2024.9	44.356	2.38702	0.705	1.32378	-0.979824	2.34772e+11	11.3706	0.596924	53.6165	1.7293	6226.77	0.622677	-0.205737	27.2301	1.43505	0.685
Indonesie	2004	24	7	3.19478	96.3418	5894	0.620161	49.4772	-1.90861	0.843	0.795	1	11.2727	70.0548	91.4504	79.7147	2.6869e+08	268.69	45.149	2.60029	0.716	1.27101	-0.976612	2.56837e+11	11.4097	1.51192	59.7613	1.77642	6089.47	0.608947	-0.21542	27.6429	1.44158	0.698
Indonesie	2005	24	7	3.03995	96.9125	270754	0.627423	51.4838	-1.51818	0.843	0.795	1	11.2727	71.1572	91.8719	80.674	2.80217e+09	2802.17	45.942	3.60202	0.699	1.28381	-0.906052	2.85869e+11	11.4562	-5.27126	63.9879	1.8061	6188.73	0.618873	-0.208398	27.7654	1.4435	0.709
Indonesie	2006	24	7	2.88758	97.478	490002	0.645663	53.5019	-1.41767	0.843	0.795	1	11.2727	72.2597	92.2934	81.623	1.53078e+09	1530.78	46.738	4.76481	0.699	1.32526	-0.864276	3.64571e+11	11.5618	-2.18845	56.6571	1.75325	6213.2	0.62132	-0.206685	28.3672	1.45282	0.709
Indonesie	2007	24	7	2.73777	75.8751	717033	0.663612	55.53	-1.19807	0.843	0.795	1	11.6364	73.3621	92.7149	82.5615	7.0513e+08	705.13	47.535	5.78627	0.7	1.32087	-0.630509	4.32217e+11	11.6357	-2.25333	54.8292	1.73901	6581.41	0.658141	-0.181681	28.9158	1.46114	0.71
Indonesie	2008	24	7	2.59045	76.8572	951574	0.681246	57.5679	-1.05679	0.844	0.795	1	11.6364	74.4646	93.1364	83.4896	8.4062e+08	840.62	48.335	7.91748	0.7	1.29735	-0.639086	5.10229e+11	11.7078	-3.41872	58.5614	1.76761	6571.27	0.657127	-0.182351	29.0916	1.46377	0.708
Indonesie	2009	24	7	2.44579	77.8298	194233	0.698539	59.6134	-0.751154	0.844	0.795	1	11.6364	75.5671	93.5266	84.3913	9.1232e+08	912.32	49.134	6.92	0.73	1.26699	-0.889641	5.3958e+11	11.7321	-2.62825	45.5121	1.65813	6665.19	0.666519	-0.176188	29.4804	1.46953	0.695
Indonesie	2010	24	7	2.30447	78.7927	447439	0.715484	61.6611	-0.853916	0.858	0.801	1	18.0357	76.6695	93.6921	85.1662	1.38741e+09	1387.41	49.914	10.92	0.731	1.26054	-0.803535	7.55094e+11	11.878	-11.1063	46.7013	1.66933	7123.85	0.712385	-0.147285	29.4964	1.46977	0.696
Indonesie	2011	24	7	2.1693	79.7463	721375	0.732194	63.6914	-0.770114	0.858	0.801	1	18.2143	77.2224	93.8553	85.6378	4.8209e+08	482.09	50.595	12.28	0.736	1.27669	-0.755871	8.92969e+11	11.9508	-11.5284	50.18	1.70053	7431.7	0.74317	-0.128912	30.045	1.47777	0.696
Indonesie	2012	24	7	2.03637	80.6893	2097	0.748614	65.7303	-0.593263	0.858	0.801	1	18.5714	77.717	94.0162	86.0746	230250000	230.25	51.276	14.52	0.737	1.28584	-0.689106	9.1787e+11	11.9628	-13.7162	49.5829	1.69533	7576.41	0.757641	-0.120537	30.0609	1.478	0.696
Indonesie	2013	24	7	1.90574	81.6224	289849	0.764727	67.7766	-0.519265	0.828	0.797	1	18.5714	78.1948	94.1748	86.4972	9.897e+07	98.97	51.955	14.94	0.721	1.24038	-0.66004	9.12524e+11	11.9602	-12.1701	48.6374	1.68697	7145.67	0.714567	-0.145957	30.3432	1.48206	0.68
Indonesie	2014	24	7	1.77729	82.5452	584257	0.78051	69.8305	-0.416824	0.823	0.798	1	16.9369	78.6559	94.3311	86.9066	-3.7379e+08	-373.79	52.635	17.1432	0.719	1.17536	-0.597599	8.90815e+11	11.9498	-14.7332	48.0802	1.68197	7179.5	0.71795	-0.143906	30.519	1.48457	0.669
Indonesie	2015	24	7	1.65113	83.458	885666	0.79595	71.8904	-0.619956	0.848	0.767	1	17.1171	79.1002	94.4851	87.3024	1.981e+07	19.81	53.313	22.0627	0.74	1.12234	-0.518548	8.60854e+11	11.9349	-10.7045	41.9376	1.6226	7202.46	0.720246	-0.142519	30.7853	1.48834	0.658
Indonesie	2016	24	7	1.52725	84.36	194048	0.811031	73.9559	-0.3797	0.838	0.741	1	17.1171	79.5277	94.6368	87.685	8.006e+07	80.06	53.989	25.4474	0.748	1.07449	-0.462464	9.31877e+11	11.9694	-16.1359	37.4213	1.57312	7243.88	0.724388	-0.140029	31.7973	1.50239	0.644
Indonesie	2017	24	7	1.40575	85.2481	509776	0.825755	76.0257	-0.504939	0.826	0.725	1	19.8214	79.9385	94.7863	88.0541	4.0271e+08	402.71	54.659	32.3358	0.737	1.02233	-0.304816	1.01562e+12	12.0067	-18.502	39.3555	1.59501	7439.38	0.743938	-0.128463	33.7147	1.52782	0.631
Indonesie	2018	24	7	1.28653	86.1093	832566	0.840102	78.0995	-0.552034	0.764	0.716	1	19.8214	80.3325	94.9334	88.4104	1.09411e+09	1094.11	55.325	39.9046	0.742	0.969743	-0.29946	1.04227e+12	12.018	-12.5106	43.0743	1.63422	8056.51	0.805651	-0.093853	34.0343	1.53192	0.603
Indonesie	2019	24	7	1.16964	86.9615	1625433	0.854072	80.1767	-0.502143	0.808	0.71	1	17.3913	80.7097	95.0782	88.7539	-6.5926e+08	-659.26	55.985	47.6906	0.737	0.935605	-0.47318	1.1191e+12	12.0489	-20.5311	37.6278	1.57551	8530.33	0.853032	-0.0690344	34.1408	1.53327	0.601
Indonesie	2020	24	7	1.055	87.8044	4994397	0.858165	82.2571	-0.462311	0.774	0.684	1	20.3478	81.0701	95.2207	89.0852	1331750000	1331.75	56.641	53.7265	0.712	0.849801	-0.454077	1.05905e+12	12.0249	-14.1425	32.9722	1.51815	7959.13	0.795913	-0.0991344	34.2473	1.53463	0.576
Indonesie	2021	24	7	0.942644	88.6385	843448	0.862142	84.3399	-0.531449	0.748	0.681	1	21.0435	81.4137	95.361	89.4041	6.259e+08	625.9	57.29	62.1045	0.704	0.704601	-0.449075	1.18651e+12	12.0743	-17.2864	40.2048	1.60428	8087.77	0.808777	-0.0921711	34.1337	1.53318	0.558
Indonesie	2022	24	7	0.832506	89.4632	1943088	0.865993	85.6487	-0.553894	0.771	0.693	1	21.913	81.7406	95.4989	89.7114	6.0683e+08	606.83	57.934	66.4846	0.723	0.74605	-0.434911	1.31908e+12	12.1203	-18.0672	45.4659	1.65769	10132.2	1.01322	0.00570174	34.1905	1.53391	0.565
Jamaique	2000	25	4	3.00241	99.917	3370962	0.520447	80.3898	0.186396	0.901	0.913	1	13.3333	87.4996	98.2017	93.0448	4.004e+07	40.04	51.814	3.11578	0.876	0.69382	0.0914869	9.00506e+09	9.95449	-0.394	89.513	1.95189	16542.1	1.65421	0.218592	44.229	1.64571	0.682
Jamaique	2001	25	4	2.93029	99.917	2556283	0.519301	80.4397	-0.0109165	0.901	0.913	1	13.3333	87.8026	98.2321	93.2315	1.1116e+08	111.16	52.053	3.86302	0.876	0.633652	-0.210053	9.19473e+09	9.96354	-0.5249	84.8277	1.92854	16699.8	1.66998	0.222711	44.229	1.64571	0.682
Jamaique	2002	25	4	2.86098	99.917	1757436	0.518585	80.4901	-0.20823	0.901	0.913	1	13.3333	88.1056	98.2625	93.4127	5.128e+07	51.28	52.251	6.1	0.873	0.614212	-0.511592	9.71901e+09	9.98762	-0.4072	81.8468	1.913	16544.6	1.65446	0.218657	43.7673	1.64115	0.7
Jamaique	2003	25	4	2.79282	99.917	965438	0.517989	80.5403	-0.384525	0.901	0.91	1	11.6667	88.4086	98.293	93.5917	2.023e+07	20.23	52.437	7.8	0.873	0.606021	-0.43517	9.43023e+09	9.97452	-0.6044	88.1506	1.94523	17159.2	1.71592	0.234496	43.7673	1.64115	0.746
Jamaique	2004	25	4	2.72503	99.917	176299	0.851989	81.0676	-0.345669	0.901	0.91	1	11.6667	88.2355	98.3234	93.5443	1.1351e+08	113.51	52.625	10	0.873	0.585569	-0.393378	1.01747e+10	10.0075	-0.541645	89.3181	1.95094	16704.5	1.67045	0.222833	43.5826	1.63931	0.746
Jamaique	2005	25	4	2.65782	99.917	939102	1.33322	81.5953	-0.298737	0.904	0.91	1	11.6667	88.0592	98.3538	93.4959	5.712e+07	57.12	52.811	12.8	0.873	0.553843	-0.34286	1.12439e+10	10.0509	-0.581472	90.4879	1.95659	17142	1.7142	0.23406	43.121	1.63469	0.76
Jamaique	2006	25	4	2.59105	99.917	8608913	1.84191	82.1233	-0.320164	0.909	0.91	1	11.6667	87.8796	98.2112	93.3552	4.886e+07	48.86	52.998	16.4	0.878	0.516034	-0.291285	1.19302e+10	10.0766	-0.796768	100.746	2.00323	19489.3	1.94893	0.289796	43.121	1.63469	0.765
Jamaique	2007	25	4	2.5248	93.6605	783047	2.35109	82.6517	-0.256037	0.909	0.911	1	13.3333	87.6968	97.7626	93.0502	3.205e+07	32.05	53.184	21.1	0.88	0.473964	-0.338424	1.27996e+10	10.1072	-0.751496	101.244	2.00537	19765.4	1.97654	0.295905	42.844	1.63189	0.77
Jamaique	2008	25	4	2.45898	93.8141	7055109	2.8607	83.1804	-0.3073	0.909	0.913	1	13.3333	87.5108	97.3136	92.7426	8.793e+07	87.93	53.371	23.6	0.88	0.435156	-0.3367	1.37094e+10	10.137	-1.36073	113.577	2.05529	16746.2	1.67462	0.223917	41.4589	1.61762	0.781
Jamaique	2009	25	4	2.39369	93.9633	6283412	3.37077	83.7095	-0.363818	0.909	0.913	1	13.3333	87.3214	96.8643	92.4323	1.5733e+08	157.33	53.557	24.3	0.884	0.415917	-0.321955	1.21205e+10	10.0835	-0.479765	86.8851	1.93895	13112.7	1.31127	0.117692	41.1819	1.61471	0.781
Jamaique	2010	25	4	2.32888	94.1106	5515077	3.88127	84.2389	-0.429541	0.909	0.913	1	13.3333	87.1289	96.4148	92.1194	1.4736e+08	147.36	53.743	27.67	0.884	0.421945	-0.265739	1.32205e+10	10.1212	-0.169451	80.9204	1.90806	11996.1	1.19961	0.0790408	38.9012	1.58996	0.781
Jamaique	2011	25	4	2.2645	94.2573	4749897	4.39211	84.7686	-0.0629833	0.909	0.913	1	12.6984	86.933	95.9649	91.8039	4.623e+07	46.23	53.93	37.4386	0.884	0.43296	-0.187364	1.44447e+10	10.1597	-0.143677	83.8218	1.92336	12652.4	1.26524	0.102171	38.8273	1.58914	0.774
Jamaique	2012	25	4	2.19999	94.4031	3985322	4.90258	85.2981	0.120508	0.909	0.914	1	12.6984	86.734	95.5148	91.4872	3.511e+07	35.11	54.132	33.79	0.883	0.431454	-0.285973	1.48071e+10	10.1705	-0.323447	82.0401	1.91403	11797.4	1.17974	0.0717851	38.7627	1.58841	0.79
Jamaique	2013	25	4	2.13536	94.5481	3221517	5.4124	85.8275	0.182374	0.939	0.913	1	12.6984	86.5316	95.0644	91.1692	74500000	74.5	54.35	37.1	0.897	0.405212	-0.304273	1.42642e+10	10.1542	-0.469978	83.2596	1.92043	12772.7	1.27727	0.106284	38.6704	1.58738	0.8
Jamaique	2014	25	4	2.07068	94.6922	2458968	5.41033	86.3567	0.0244925	0.939	0.913	1	12.6984	86.326	94.6136	90.8497	9.701e+07	97.01	54.584	40.4027	0.897	0.360811	-0.325509	1.38992e+10	10.143	-0.522669	84.741	1.92809	12534	1.2534	0.0980883	38.5873	1.58644	0.8
Jamaique	2015	25	4	2.00605	94.8355	1698189	5.40734	86.8856	0.0859657	0.939	0.913	1	12.6984	86.1172	94.1626	90.5287	6.717e+07	67.17	54.833	42.2212	0.897	0.313959	-0.283773	1.41889e+10	10.1519	-0.890765	76.1175	1.88148	12881.9	1.28819	0.109979	38.5042	1.58551	0.8
Jamaique	2016	25	4	1.94148	94.978	93957	5.40336	87.4142	0.295468	0.939	0.913	1	17.4603	85.9051	93.7112	90.2061	3.277e+07	32.77	55.098	44.3669	0.903	0.263023	-0.208374	1.40771e+10	10.1485	-0.657891	76.4552	1.88341	13297	1.3297	0.123752	38.5042	1.58551	0.806
Jamaique	2017	25	4	1.87707	95.1196	183556	5.39845	87.9424	0.298303	0.942	0.913	1	17.4603	85.6898	93.2596	89.8818	6.965e+07	69.65	55.378	55.0721	0.905	0.207939	-0.224058	1.4809e+10	10.1705	-0.854504	83.5232	1.92181	11942.5	1.19425	0.0770955	38.5042	1.58551	0.816
Jamaique	2018	25	4	1.81285	95.2605	9430498	5.39253	88.4702	0.423994	0.935	0.913	1	17.4603	85.4712	92.8077	89.5557	1.0815e+08	108.15	55.674	68.2145	0.904	0.153765	-0.230747	1.57308e+10	10.1968	-0.76195	89.9779	1.95414	12335	1.2335	0.0911404	38.5042	1.58551	0.811
Jamaique	2019	25	4	1.74891	95.4015	868089	5.38565	88.9976	0.38831	0.942	0.886	1	17.4603	85.2494	92.3555	89.2277	1.3757e+08	137.57	55.985	70.841	0.923	0.112486	-0.113834	1.58308e+10	10.1995	-0.219425	90.1106	1.95478	15387.2	1.53872	0.187161	38.5042	1.58551	0.812
Jamaique	2020	25	4	1.73847	95.5425	864009	5.36757	89.5245	0.258682	0.943	0.887	1	28.5714	85.0243	91.903	88.8977	7.092e+07	70.92	56.311	76.384	0.933	0.264167	-0.0465458	1.38124e+10	10.1403	-0.258408	90.0443	1.95446	12098.7	1.20987	0.0827398	38.5042	1.58551	0.811
Jamaique	2021	25	4	1.72756	95.6834	8597431	5.34866	90.0509	0.217994	0.931	0.888	1	28.5714	84.7959	91.4501	88.5657	5.858e+07	58.58	56.652	82.3607	0.94	0.244971	-0.0529802	1.46576e+10	10.1661	-0.264325	90.0774	1.95462	12235.8	1.22358	0.0876318	38.5042	1.58551	0.806
Jamaique	2022	25	4	1.71617	95.8241	8552818	5.32891	90.5767	0.364243	0.923	0.888	1	28.5714	84.5643	90.997	88.2315	9.542e+07	95.42	57.008	85.1185	0.951	0.0515077	-0.0233815	1.70978e+10	10.2329	-0.258446	90.0608	1.95454	12167.3	1.21673	0.0851927	38.5042	1.58551	0.802
Kenya	2000	26	1	29.0085	96.8382	431866	7.03804	23.6474	-1.06835	0.676	0.683	1	3.57143	35.4169	85.4026	45.36	7.6304e+08	763.04	19.892	0.31806	0.583	3.01294	-1.14436	1.27054e+10	10.104	-0.110905	53.309	1.7268	1478.99	0.147899	-0.830035	46.8619	1.67082	0.377
Kenya	2001	26	1	28.5232	97.0974	94248	7.13061	24.3165	-1.12818	0.683	0.683	1	3.57143	36.2537	85.5465	46.2301	7.5783e+08	757.83	20.239	0.619782	0.583	3.13629	-1.07406	1.2986e+10	10.1135	-0.00530262	55.9468	1.74778	1460.38	0.146038	-0.835535	47.1571	1.67355	0.377
Kenya	2002	26	1	28.041	97.3556	757917	7.22162	25.0346	-1.18801	0.724	0.754	1	3.57143	37.0908	85.6905	47.098	5.9558e+08	595.58	20.591	1.20777	0.621	3.14626	-1.00375	1.31477e+10	10.1189	-0.0202026	55.1727	1.74172	1429.81	0.142981	-0.844721	47.1202	1.67321	0.419
Kenya	2003	26	1	27.562	97.3613	422917	7.31107	25.7535	-1.26387	0.853	0.779	1	7.14286	37.9283	85.8346	47.9637	7.1693e+08	716.93	20.948	2.9419	0.618	3.08529	-0.964617	1.49045e+10	10.1733	-0.0796629	54.1323	1.73346	1321.46	0.132146	-0.878945	47.2186	1.67411	0.512
Kenya	2004	26	1	27.0862	97.3683	89298	7.39891	26.4731	-1.08735	0.853	0.779	1	7.14286	38.7661	85.9789	48.8271	8.1048e+08	810.48	21.31	3.02353	0.623	3.10482	-0.89788	1.60953e+10	10.2067	-0.0416478	59.477	1.77435	1380.11	0.138011	-0.860087	47.4259	1.67602	0.512
Kenya	2005	26	1	26.6144	97.3764	757341	7.48522	27.1932	-1.25051	0.853	0.779	1	7.14286	39.6042	86.1232	49.6872	9.1463e+08	914.63	21.675	3.1019	0.62	3.07223	-1.01254	1.87379e+10	10.2727	-0.0115245	64.4789	1.80942	1454.52	0.145452	-0.837279	47.4435	1.67618	0.512
Kenya	2006	26	1	26.146	97.3857	426832	7.56988	27.9139	-1.12698	0.853	0.778	1	7.30594	40.4427	86.2677	50.5448	1.11501e+09	1115.01	22.045	3.6	0.62	3.04705	-0.935451	2.58255e+10	10.412	-0.026717	55.2365	1.74223	1549.11	0.154911	-0.809917	47.5349	1.67701	0.51
Kenya	2007	26	1	25.6812	54.5596	97814	7.65289	28.635	-1.30544	0.858	0.778	1	7.24638	41.2815	86.4123	51.3998	1.35241e+09	1352.41	22.42	4.4	0.633	3.02221	-0.978595	3.19582e+10	10.5046	-0.693011	53.8948	1.73155	1513.09	0.151309	-0.820137	47.563	1.67727	0.51
Kenya	2008	26	1	25.22	55.3825	770325	7.73422	29.3566	-1.39362	0.864	0.777	1	9.82143	42.1206	86.557	52.2521	1.35897e+09	1358.97	22.8	5.2	0.627	3.02965	-1.06837	3.58952e+10	10.555	-0.0518191	57.5786	1.76026	1449.55	0.144955	-0.838766	47.5893	1.67751	0.413
Kenya	2009	26	1	24.7631	56.2011	444636	7.81393	30.0784	-1.42558	0.865	0.777	1	8.5339	42.9601	86.7018	53.1007	1.90338e+09	1903.38	23.183	6.1	0.628	3.02111	-1.07073	4.23472e+10	10.6268	-0.0702698	45.9452	1.66224	1537.14	0.153714	-0.813286	47.9408	1.6807	0.413
Kenya	2010	26	1	24.3101	57.0151	120557	7.89193	30.8005	-1.16552	0.898	0.797	1	9.82143	43.7999	86.8467	53.9464	1.81465e+09	1814.65	23.571	7.2	0.696	2.90159	-0.911055	4.54056e+10	10.6571	-0.176487	50.3943	1.70238	1622.72	0.162272	-0.789755	47.9847	1.6811	0.423
Kenya	2011	26	1	23.8596	57.8245	797594	7.96791	31.5229	-1.24479	0.898	0.797	1	9.82143	44.64	86.9917	54.7913	2.59951e+09	2599.51	23.969	8.8	0.689	2.75014	-0.963742	4.68695e+10	10.6709	-1.36449	58.4022	1.76643	1633.51	0.163351	-0.786879	48.5311	1.68602	0.425
Kenya	2012	26	1	23.4123	58.6283	475936	8.0419	32.2455	-1.32344	0.898	0.797	1	9.82143	45.4804	87.1369	55.6346	2.82764e+09	2827.64	24.376	10.5	0.689	2.60807	-1.09888	5.63967e+10	10.7513	-1.1418	51.6237	1.71285	1575.04	0.157504	-0.802708	48.5504	1.68619	0.43
Kenya	2013	26	1	22.9677	59.4272	155458	8.11373	32.9682	-1.16693	0.884	0.859	1	18.5714	46.3212	87.2821	56.4771	3.45091e+09	3450.91	24.794	13	0.736	2.47211	-1.03594	6.16714e+10	10.7901	-0.920213	47.4646	1.67637	1620.45	0.162045	-0.790365	48.5698	1.68637	0.519
Kenya	2014	26	1	22.5266	60.221	836447	8.18346	33.6909	-1.28225	0.882	0.847	1	19.1429	47.1623	87.4275	57.3176	2.77681e+09	2776.81	25.221	16.5	0.739	2.33901	-0.938905	6.82858e+10	10.8343	-0.745819	46.1705	1.66436	1655.02	0.165502	-0.781196	48.5891	1.68654	0.532
Kenya	2015	26	1	22.089	61.0097	518889	8.251	34.4134	-1.24135	0.882	0.847	1	19.7143	48.0038	87.573	58.1564	2.77947e+09	2779.47	25.658	16.5879	0.739	2.22703	-1.03067	7.01204e+10	10.8458	-0.377732	40.3274	1.6056	1911.9	0.19119	-0.718534	48.6102	1.68673	0.532
Kenya	2016	26	1	21.6549	61.7923	20286	8.31629	35.1355	-1.35446	0.878	0.84	1	19.7143	48.8455	87.7186	58.9933	2.4816e+09	2481.6	26.105	16.6	0.746	2.20776	-0.913664	7.48151e+10	10.874	-0.352629	34.865	1.54239	1966.59	0.196659	-0.706287	48.6295	1.6869	0.535
Kenya	2017	26	1	21.2247	62.5694	888452	8.37928	35.8573	-1.12844	0.839	0.825	1	21.7765	49.6876	87.8643	59.8281	2.7706e+09	2770.6	26.562	17.8271	0.762	2.17413	-0.975331	8.20365e+10	10.914	-1.23618	35.9951	1.55624	1939.66	0.193966	-0.712275	48.6488	1.68707	0.511
Kenya	2018	26	1	20.7983	63.3428	575653	8.43988	36.5784	-1.17971	0.831	0.797	1	21.7765	50.5301	88.0101	60.6609	2.67518e+09	2675.18	27.03	19.5	0.744	2.03084	-0.862696	9.2203e+10	10.9647	-0.770979	34.4148	1.53674	2047.27	0.204727	-0.688824	48.6682	1.68724	0.495
Kenya	2019	26	1	20.3763	64.1118	264731	8.49814	37.2988	-1.10576	0.828	0.802	1	21.7765	51.3728	88.156	61.4908	3.44213e+09	3442.13	27.507	22.6688	0.754	1.96382	-0.807419	1.00378e+11	11.0016	-0.432713	31.7595	1.50187	1946.34	0.194634	-0.710781	48.6875	1.68742	0.495
Kenya	2020	26	1	19.9586	64.8768	955605	8.5539	38.0183	-1.00724	0.851	0.786	1	21.7765	52.2159	88.302	62.3182	4.22259e+09	4222.59	27.995	27.5774	0.753	1.96198	-0.876584	1.00658e+11	11.0028	-0.568784	27.2363	1.43515	1902.12	0.190212	-0.720762	48.6875	1.68742	0.499
Kenya	2021	26	1	19.5456	65.6369	648429	8.60717	38.7369	-1.03244	0.873	0.806	1	21.6138	53.0593	88.4482	63.1427	3.17692e+09	3176.92	28.493	38.2459	0.777	1.90041	-0.735883	1.09704e+11	11.0402	-0.0533576	30.6893	1.48699	1952.69	0.195269	-0.709366	48.6875	1.68742	0.509
Kenya	2022	26	1	19.1372	66.3922	343226	8.65783	39.4543	-0.947281	0.874	0.845	1	23.4286	53.9031	88.5944	63.9643	2.73257e+09	2732.57	29.002	40.8137	0.781	1.92298	-0.759701	1.1342e+11	11.0547	-0.344384	33.7296	1.52801	1927.41	0.192741	-0.715027	48.6875	1.68742	0.546
Thailande	2000	27	7	0.583407	100	1017036	0.199525	92.1751	0.454959	0.695	0.845	0.98	4.81283	92.0113	97.6358	93.7766	6.8777e+08	687.77	31.386	3.68904	0.776	1.13127	-0.230174	1.26392e+11	11.1017	-3.38896	121.298	2.08385	11760.4	1.17604	0.0704236	42.8566	1.63202	0.513
Thailande	2001	27	7	0.568896	100	7462273	0.196993	92.427	0.480618	0.685	0.852	0.98	9.2	92.3915	97.7652	94.1405	3.5121e+08	351.21	32.548	5.55633	0.786	1.01585	-0.284511	1.20296e+11	11.0803	-4.63947	120.268	2.08015	12289.2	1.22892	0.0895248	43.0386	1.63386	0.559
Thailande	2002	27	7	0.554486	100	39618	0.194362	92.6825	0.506277	0.685	0.834	0.98	7.00642	92.7718	97.8946	94.4999	3.6211e+08	362.11	33.734	7.53125	0.786	0.962027	-0.338848	1.34301e+11	11.1281	-3.17088	114.97	2.06058	13203.2	1.32032	0.120678	43.2207	1.63569	0.551
Thailande	2003	27	7	0.540205	100	518823	0.191639	92.9418	-0.145084	0.685	0.836	0.98	9.2	93.152	98.024	94.8543	-9.0608e+08	-906.08	34.941	9.29903	0.786	0.931948	-0.196024	1.52281e+11	11.1826	-4.60938	116.693	2.06704	14074.3	1.40743	0.148427	43.4027	1.63752	0.552
Thailande	2004	27	7	0.526061	100	7135036	0.188823	93.2051	-0.717406	0.685	0.825	0.98	8.83002	93.5322	98.1534	95.2037	8.78e+07	87.8	36.169	10.6773	0.787	0.896077	-0.246132	1.72896e+11	11.2378	-5.78359	127.412	2.10521	15154.1	1.51541	0.18053	43.5847	1.63933	0.548
Thailande	2005	27	7	0.512107	100	3814642	0.182444	93.4725	-0.870127	0.66	0.826	0.98	10.6	93.9074	98.2681	95.5388	-1.1984e+08	-119.84	37.411	15.026	0.786	0.860088	-0.206433	1.89318e+11	11.2772	-7.6642	137.854	2.13942	15513.5	1.55135	0.190709	43.7668	1.64114	0.525
Thailande	2006	27	7	0.498309	100	556877	0.183159	93.7441	-1.1302	0.592	0.56	0.98	8.67769	94.2826	98.3827	95.8682	-1.8743e+08	-187.43	38.673	17.1607	0.731	0.830063	-0.41343	2.21758e+11	11.3459	-7.87671	134.087	2.12739	15726.9	1.57269	0.196642	43.9488	1.64295	0.236
Thailande	2007	27	7	0.484705	100	7364874	0.184404	94.0201	-1.11285	0.521	0.466	0.98	11.74	94.6577	98.4974	96.1917	-3.0929e+08	-309.29	39.95	20.03	0.78	0.800044	-0.400172	2.62943e+11	11.4199	-7.08689	129.873	2.11352	16141	1.6141	0.207931	44.1289	1.64472	0.184
Thailande	2008	27	7	0.471301	100	4239872	0.186193	94.3004	-1.27209	0.587	0.664	0.98	11.6667	95.0328	98.6119	96.5089	-5.5368e+08	-553.68	41.242	18.2	0.78	0.768156	-0.440627	2.91383e+11	11.4645	-6.22186	140.437	2.14748	16019.2	1.60192	0.204641	44.3109	1.64651	0.406
Thailande	2009	27	7	0.458138	100	1184475	0.188552	94.5854	-1.42447	0.592	0.668	0.98	11.7034	95.4078	98.7265	96.8197	8.16e+06	8.16	42.543	20.1	0.784	0.738543	-0.332013	2.81711e+11	11.4498	-0.41518	119.269	2.07653	16352.4	1.63524	0.21358	44.4929	1.64829	0.422
Thailande	2010	27	7	0.445202	100	8198875	0.191485	94.8749	-1.44279	0.597	0.665	0.98	13.3192	95.7828	98.841	97.124	2.179e+07	21.79	43.856	22.4	0.784	0.670617	-0.360339	3.41105e+11	11.5329	-6.61534	127.251	2.10466	17276.1	1.72761	0.237445	44.675	1.65006	0.416
Thailande	2011	27	7	0.435334	100	5368781	0.195739	95.1765	-1.13353	0.62	0.755	0.992	15.8	96.1578	98.9554	97.4083	-9.292e+07	-92.92	44.698	23.6699	0.8	0.621808	-0.353244	3.70819e+11	11.5692	4.70208	139.675	2.14512	17645.6	1.76456	0.246637	44.6828	1.65014	0.461
Thailande	2012	27	7	0.426207	100	2599448	0.200502	95.4825	-1.21663	0.653	0.77	0.992	15.8	96.5327	99	97.6857	-6.496e+07	-64.96	45.445	26.46	0.8	0.619591	-0.397404	3.97558e+11	11.5994	1.36153	137.675	2.13885	18694.7	1.86947	0.271719	44.6906	1.65022	0.499
Thailande	2013	27	7	0.417245	100	98715067	0.205609	95.7915	-1.31168	0.587	0.715	0.992	15.8	96.9076	99	97.9592	5.229e+07	52.29	46.193	28.94	0.72	0.587326	-0.372476	4.20334e+11	11.6236	-3.81447	132.462	2.12209	18868.8	1.88688	0.275744	44.699	1.6503	0.435
Thailande	2014	27	7	0.408443	100	71848446	0.21106	96.1032	-0.906386	0.261	0.235	0.992	6.09137	97.2824	99	98.2289	3.6096e+08	360.96	46.943	34.8861	0.645	0.53013	-0.48052	4.07339e+11	11.61	0.7663	130.905	2.11696	19399	1.9399	0.287778	44.7102	1.65041	0.155
Thailande	2015	27	7	0.399808	100	45397127	0.216861	96.4179	-0.995045	0.27	0.171	0.992	6.09137	97.6572	99	98.4946	6.797e+07	67.97	47.694	39.3161	0.674	0.460976	-0.55555	4.01296e+11	11.6035	-3.93653	124.84	2.09635	19595.4	1.95954	0.292154	44.718	1.65048	0.149
Thailande	2016	27	7	0.39133	100	1936242	0.223013	96.7354	-0.9913	0.288	0.187	0.992	6.09137	98.032	99	98.7564	2.4129e+08	241.29	48.448	47.505	0.612	0.451266	-0.451498	4.13366e+11	11.6163	9.90645	120.575	2.08126	19907	1.9907	0.299005	44.7102	1.65041	0.153
Thailande	2017	27	7	0.382912	100	2.36667e+07	0.229379	97.0558	-0.754879	0.276	0.16	0.992	4.8	98.4067	99	99	2.7068e+08	270.68	49.2	52.8919	0.642	0.422964	-0.445775	4.56357e+11	11.6593	5.89686	120.891	2.0824	20207.6	2.02076	0.305515	44.72	1.6505	0.147
Thailande	2018	27	7	0.31317	100	17134649	0.151222	97.3792	-0.799416	0.366	0.194	0.992	5.28455	98.7814	99	99	-4.1733e+08	-417.33	49.949	56.8175	0.653	0.302929	-0.458019	5.06754e+11	11.7048	3.38009	120.842	2.08222	20784.8	2.07848	0.317746	44.7174	1.65048	0.166
Thailande	2019	27	7	0.348041	100	1796789	0.0351668	97.7054	-0.491406	0.428	0.527	0.994	16.2	99	99	99	-3.3415e+08	-334.15	50.692	66.6524	0.68	0.20461	-0.47176	5.43977e+11	11.7356	4.64484	109.69	2.04017	20751.5	2.07515	0.31705	45.0195	1.6534	0.205
Thailande	2020	27	7	0.330605	97.4082	9465719	0.0931943	98.0345	-0.57827	0.425	0.475	0.994	15.7464	99	99	99	209500000	209.5	51.43	77.8437	0.639	0.166541	-0.483638	5.00462e+11	11.6994	23.5435	97.8007	1.99034	19247.9	1.92479	0.284384	45.5517	1.6585	0.192
Thailande	2021	27	7	0.339323	97.5491	20076507	0.0641806	98.3664	-0.56878	0.425	0.529	0.994	15.7464	99	99	99	1.3239e+08	132.39	52.163	85.2696	0.649	0.119758	-0.478348	5.06256e+11	11.7044	3.98042	117.145	2.06872	19368.6	1.93686	0.287097	45.9982	1.66274	0.199
Thailande	2022	27	7	0.334964	97.6882	14771113	0.0786875	98.7011	-0.393339	0.432	0.558	0.994	15.7464	99	99	99	6.2753e+08	627.53	52.889	87.9772	0.651	0.0111485	-0.452194	4.95645e+11	11.6952	-3.71702	132.856	2.12338	19357.8	1.93578	0.286855	45.7749	1.66063	0.206
Malaisie	2000	28	7	0.854262	86.0877	868695	0.398483	93.09	0.0926912	0.235	0.652	1	10.3627	92.364	98.4014	96.1058	6.685e+07	66.85	61.977	21.3847	0.632	2.3448	0.286161	9.37897e+10	10.9722	-1.76158	220.407	2.34322	26639.9	2.66399	0.425533	21.1192	1.32468	0.275
Malaisie	2001	28	7	0.835268	87.2056	830063	0.396005	93.2718	0.316143	0.263	0.652	1	10.3627	92.4821	98.4123	96.2135	4.311e+07	43.11	62.922	26.696	0.632	2.40351	0.266445	9.27839e+10	10.9675	-0.287105	203.365	2.30828	26582.3	2.65823	0.424593	21.1444	1.3252	0.282
Malaisie	2002	28	7	0.816494	88.3199	8494947	0.393226	93.45	0.539594	0.263	0.652	1	10.3627	92.6002	98.4232	96.3186	118000000	118	63.856	32.3382	0.637	2.41856	0.246729	1.00846e+11	11.0037	-1.29868	199.356	2.29963	27303.6	2.73036	0.436219	21.4199	1.33082	0.282
Malaisie	2003	28	7	0.797922	89.4299	8667965	0.390489	93.6246	0.485535	0.269	0.661	1	10.4712	92.7182	98.4342	96.421	1.2406e+08	124.06	64.78	34.9712	0.643	2.36625	0.31572	1.10202e+11	11.0422	-1.10368	194.195	2.28824	28867.1	2.88671	0.460404	21.6595	1.33565	0.284
Malaisie	2004	28	7	0.779551	90.5354	8820177	0.387793	93.7956	0.348004	0.341	0.661	1	9.13242	92.8363	98.4451	96.5209	2.9594e+08	295.94	65.694	42.2523	0.655	2.31172	0.323187	1.24749e+11	11.096	-2.56289	210.374	2.32299	30459.6	3.04596	0.483724	21.7066	1.33659	0.308
Malaisie	2005	28	7	0.761461	91.6356	895392	0.38515	93.9631	0.566449	0.341	0.661	1	9.13242	92.9544	98.456	96.6181	3.52e+07	35.2	66.594	48.6292	0.658	2.26773	0.17008	1.43534e+11	11.157	-0.993683	203.855	2.30932	32213.1	3.22131	0.508033	21.7148	1.33676	0.31
Malaisie	2006	28	7	0.743592	92.7302	906823	0.382549	94.1271	0.28838	0.338	0.668	1	9.13242	93.0724	98.4669	96.7128	2.5548e+08	255.48	67.483	51.638	0.658	2.22705	0.213226	1.62692e+11	11.2114	-0.0531395	202.577	2.30659	31831.4	3.18314	0.502856	21.5346	1.33314	0.313
Malaisie	2007	28	7	0.725964	97.2771	9164107	0.379995	94.2878	0.193307	0.331	0.668	1	10.0457	93.1905	98.4778	96.8049	2.1835e+08	218.35	68.36	55.7	0.663	2.1735	0.166801	1.9355e+11	11.2868	2.74419	192.466	2.28435	33221.5	3.32215	0.521419	21.632	1.3351	0.314
Malaisie	2008	28	7	0.734778	95.0036	6327763	0.377486	94.4451	0.108542	0.335	0.654	1	10.8108	93.3086	98.4887	96.8945	1.5173e+08	151.73	69.225	55.8	0.663	2.09532	-0.0905064	2.30812e+11	11.3633	7.8275	176.668	2.24716	33712.1	3.37121	0.527786	21.7635	1.33773	0.329
Malaisie	2009	28	7	0.730371	96.1403	6218922	0.37503	94.5991	-0.0416609	0.328	0.64	1	10.4282	93.4267	98.4996	96.9815	1.3277e+08	132.77	70.075	55.9	0.669	1.99206	-0.0939427	2.02257e+11	11.3059	6.62613	162.559	2.21101	32003.5	3.20035	0.505197	21.9753	1.34194	0.331
Malaisie	2010	28	7	0.732574	95.572	6096296	0.372622	94.7499	0.143352	0.331	0.642	1	9.90991	93.5447	98.5105	97.0661	9.91e+06	9.91	70.912	56.3	0.663	1.87041	0.0570844	2.55018e+11	11.4066	4.46361	157.945	2.19851	32487.7	3.24877	0.51172	22.4906	1.352	0.334
Malaisie	2011	28	7	0.731473	95.8561	6055255	0.370583	94.895	0.0774098	0.323	0.643	1	10.4072	93.6628	98.5214	97.142	4.653e+07	46.53	71.609	61	0.664	1.75128	0.0225716	2.97952e+11	11.4741	2.98896	154.938	2.19016	32524.6	3.25246	0.512212	22.9207	1.36023	0.33
Malaisie	2012	28	7	0.732023	95.7141	6018775	0.368634	95.0372	-0.0052124	0.323	0.643	1	10.4072	93.7809	98.5323	97.215	2.107e+07	21.07	72.275	65.8	0.664	1.7027	0.213313	3.14443e+11	11.4975	8.0011	147.842	2.1698	35010.1	3.50101	0.544194	23.8296	1.37712	0.33
Malaisie	2013	28	7	0.731748	95.7851	5972567	0.366724	95.1769	0.0517916	0.322	0.648	1	10.3604	93.8989	98.5433	97.286	-1.0139e+08	-101.39	72.93	57.0575	0.656	1.70946	0.333291	3.23276e+11	11.5096	2.11193	142.721	2.15449	36062.6	3.60625	0.557056	24.5299	1.3897	0.326
Malaisie	2014	28	7	0.731886	95.7496	5914657	0.364846	95.3143	0.266619	0.322	0.674	1	10.3604	94.017	98.5542	97.3553	2.09e+07	20.9	73.577	63.6654	0.656	1.71474	0.396689	3.38066e+11	11.529	5.44044	138.312	2.14086	35862.2	3.58622	0.554637	24.6203	1.39129	0.33
Malaisie	2015	28	7	0.731817	95.7673	5847874	0.363006	95.4492	0.253947	0.322	0.674	1	10.3604	94.1351	98.5651	97.4227	150000	0.15	74.213	71.0641	0.656	1.73319	0.181794	3.01355e+11	11.4791	0.684809	131.37	2.1185	35874.4	3.58744	0.554784	26.0842	1.41638	0.33
Malaisie	2016	28	7	0.731851	95.7585	5771027	0.361199	95.5818	0.129486	0.322	0.677	1	10.3604	94.2532	98.576	97.4884	-4.515e+07	-45.15	74.84	78.7883	0.656	1.76731	0.0275785	3.01256e+11	11.4789	-3.37277	126.899	2.10346	37184.8	3.71848	0.570365	26.0874	1.41643	0.329
Malaisie	2017	28	7	0.731834	95.7629	5693638	0.359452	95.7121	0.11121	0.336	0.702	1	10.3604	94.3712	98.5869	97.5518	-2.376e+07	-23.76	75.447	80.1405	0.672	1.76466	-0.00590146	3.19109e+11	11.5039	-3.76009	133.155	2.12436	37168	3.7168	0.570169	26.0874	1.41643	0.335
Malaisie	2018	28	7	0.731843	95.7607	5614727	0.35776	95.8087	0.248114	0.633	0.744	1	13.9013	94.4893	98.5978	97.6132	-3.064e+07	-30.64	76.036	81.201	0.731	1.70175	0.300331	3.58789e+11	11.5548	-2.53915	130.403	2.11529	37333.4	3.73334	0.572098	26.0874	1.41643	0.441
Malaisie	2019	28	7	0.731838	95.7618	5535095	0.356123	95.9357	0.14648	0.663	0.744	1	14.4144	94.6074	98.6087	97.6727	4.68e+06	4.68	76.607	84.1871	0.764	1.59647	0.233308	3.65178e+11	11.5625	-1.62697	123.029	2.09001	37824.1	3.78241	0.577768	26.0874	1.41643	0.475
Malaisie	2020	28	7	0.731841	95.7612	5455496	0.35454	95.9966	0.125865	0.567	0.693	1	14.8649	94.7254	98.6196	97.7302	2750000	2.75	77.16	89.555	0.802	1.33363	0.22911	3.37456e+11	11.5282	-0.762778	116.788	2.0674	36037	3.6037	0.556749	26.0874	1.41643	0.425
Malaisie	2021	28	7	0.731839	95.7615	5375757	0.353007	96.0173	0.0595565	0.563	0.728	1	14.8649	94.8435	98.6305	97.7859	1.439e+07	14.39	77.696	96.7514	0.803	1.15251	0.146786	3.73832e+11	11.5727	-7.46018	134.019	2.12717	37131.5	3.71315	0.569743	26.0874	1.41643	0.426
Malaisie	2022	28	7	0.73184	95.7614	491804	0.351737	96.0183	0.163118	0.619	0.756	1	13.5747	94.9616	98.6414	97.8398	-5500000	-5.5	78.214	97.3986	0.788	1.19777	0.249184	4.07027e+11	11.6096	-3.96708	146.664	2.16632	39226.6	3.92266	0.59358	26.0874	1.41643	0.456
Tanzanie	2000	29	1	17.427	99.5184	8832	7.02339	3.44646	-0.701926	0.72	0.757	1	21.8094	17.3308	67.8966	28.6115	1.5851e+09	1585.1	22.309	0.117194	0.787	1.23403	-0.810984	1.33718e+10	10.1262	-0.463401	23.9891	1.38001	507.4	0.05074	-1.29465	38.3834	1.58414	0.484
Tanzanie	2001	29	1	17.2214	99.5309	236137	7.46924	4.7329	-0.477608	0.741	0.759	1	22.2628	18.4758	68.7181	29.8678	1956000000	1956	22.674	0.1713	0.793	2.3448	-0.825958	1.3564e+10	10.1324	-0.54927	28.0301	1.44763	568.767	0.0568767	-1.24507	38.4963	1.58542	0.449
Tanzanie	2002	29	1	17.0159	99.5433	592865	7.91144	6.0217	-0.253289	0.741	0.759	1	21.3559	19.6208	69.5397	31.1241	2.0028e+09	2002.8	23.044	0.222484	0.795	2.40351	-0.840932	1.41297e+10	10.1501	-0.395567	27.4992	1.43932	609.646	0.0609646	-1.21492	38.6092	1.58669	0.449
Tanzanie	2003	29	1	16.7758	99.5561	896736	8.34416	7.34205	-0.855547	0.741	0.759	1	21.3559	20.7658	70.3612	32.4758	2.32322e+09	2323.22	23.611	0.676963	0.795	2.41856	-0.734542	1.52115e+10	10.1822	-0.318401	30.4488	1.48357	599.979	0.0599979	-1.22186	38.6882	1.58758	0.449
Tanzanie	2004	29	1	16.5291	99.5692	195873	8.79282	8.6899	-0.671642	0.741	0.759	1	30.4075	22.0618	71.1282	33.9471	2.17674e+09	2176.74	24.223	0.877575	0.795	2.36625	-0.56557	1.66731e+10	10.222	-0.44254	33.6098	1.52647	711.855	0.0711855	-1.14761	39.2381	1.59371	0.449
Tanzanie	2005	29	1	16.2823	99.5821	501095	9.23551	10.0408	-0.583454	0.724	0.736	1	30.4075	23.3734	71.8939	35.4284	1787250000	1787.25	24.845	1.1	0.809	2.31172	-0.607606	1.83954e+10	10.2647	-0.935521	36.9593	1.56772	731.133	0.0731133	-1.136	39.867	1.60061	0.433
Tanzanie	2006	29	1	16.0351	99.5949	812344	9.67256	11.3956	-0.357518	0.737	0.736	1	30.4075	24.7009	72.6584	36.9195	2.19903e+09	2199.03	25.478	1.3	0.809	2.26773	-0.228577	1.86199e+10	10.27	-0.403039	42.7682	1.63112	731.379	0.0731379	-1.13586	40.4959	1.60741	0.472
Tanzanie	2007	29	1	15.7879	99.6075	130127	10.1044	12.7549	-0.387062	0.743	0.736	1	30.4075	26.0441	73.4216	38.4196	2.45997e+09	2459.97	26.121	1.6	0.809	2.22705	-0.335751	2.18604e+10	10.3397	-0.581512	48.0584	1.68177	770.02	0.077002	-1.1135	41.1136	1.61399	0.472
Tanzanie	2008	29	1	15.5402	99.6206	45414	10.5313	14.1197	-0.228934	0.743	0.738	1	30.4075	27.4031	74.1836	39.9291	1.95887e+09	1958.87	26.776	1.9	0.809	2.1735	-0.416348	2.79478e+10	10.4463	-1.38326	49.0265	1.69043	781.391	0.0781391	-1.10713	41.7413	1.62057	0.473
Tanzanie	2009	29	1	15.2929	99.6339	78566	10.9539	15.4903	0.0891812	0.734	0.738	1	30.4075	28.7779	74.9443	41.4455	2.48058e+09	2480.58	27.439	2.4	0.811	2.09532	-0.447849	2.94006e+10	10.4684	-0.95263	43.5326	1.63881	755.739	0.0755739	-1.12163	41.9809	1.62305	0.474
Tanzanie	2010	29	1	15.0453	99.6468	123875	11.3724	16.868	0.0144716	0.733	0.743	1	36	30.1684	75.7037	42.9702	3.19174e+09	3191.74	28.114	2.9	0.818	1.99206	-0.542279	3.20129e+10	10.5053	-1.8132	47.6404	1.67798	846.932	0.0846932	-1.07215	42.2206	1.62552	0.477
Tanzanie	2011	29	1	14.798	99.6594	469765	11.7873	18.2532	-0.0241335	0.745	0.744	1	36	31.5748	76.4619	44.5014	2.49528e+09	2495.28	28.798	3.2	0.818	1.87041	-0.60336	3.46571e+10	10.5398	-1.22936	56.1661	1.74947	838.51	0.083851	-1.07649	42.4603	1.62798	0.483
Tanzanie	2012	29	1	14.5505	99.6717	823067	12.199	19.6471	0.0514543	0.744	0.744	1	36	32.9968	77.2188	46.0392	2.93793e+09	2937.93	29.493	3.95	0.818	1.75128	-0.76462	3.96504e+10	10.5982	-1.79965	54.3689	1.73535	978.381	0.0978381	-1.00949	42.3319	1.62667	0.484
Tanzanie	2013	29	1	14.3036	99.6836	18468	12.6081	21.0498	-0.162121	0.745	0.726	1	36	34.4347	77.9745	47.582	3.55084e+09	3550.84	30.196	4.4	0.815	1.7027	-0.780951	4.56489e+10	10.6594	-2.08726	48.6316	1.68692	991.198	0.0991198	-1.00384	42.9396	1.63286	0.479
Tanzanie	2014	29	1	14.0577	99.6952	55543	13.015	22.4617	-0.597119	0.74	0.726	1	36	35.8883	78.7289	49.1278	2.72569e+09	2725.69	30.904	7	0.816	1.70946	-0.761074	4.99867e+10	10.6989	-1.41609	45.356	1.65663	1005.09	0.100509	-0.997796	43.1793	1.63528	0.476
Tanzanie	2015	29	1	13.8129	99.7065	93543	13.4202	23.8834	-0.423461	0.715	0.705	1	36.5591	37.3577	79.482	50.6762	2.90683e+09	2906.83	31.617	10	0.809	1.71474	-0.709463	4.74139e+10	10.6759	-1.50602	40.7577	1.61021	1002.21	0.100221	-0.999042	43.4189	1.63768	0.463
Tanzanie	2016	29	1	13.5694	99.7174	325193	13.8242	25.3154	-0.448247	0.628	0.667	1	37.1795	38.8429	80.2339	52.2259	2.61634e+09	2616.34	32.333	13.5042	0.81	1.73319	-0.53109	4.97744e+10	10.697	-0.86404	35.4205	1.54925	1062.16	0.106216	-0.973812	43.6586	1.64007	0.415
Tanzanie	2017	29	1	13.3272	99.7281	724583	14.2274	26.7585	-0.570162	0.629	0.644	1	37.1795	40.3438	80.9845	53.7768	2.89107e+09	2891.07	33.053	16	0.815	1.76731	-0.487049	5.32749e+10	10.7265	-0.9377	33.1126	1.51999	931.573	0.0931573	-1.03078	43.8983	1.64245	0.41
Tanzanie	2018	29	1	13.0864	99.7385	133871	14.6303	28.2134	-0.580476	0.598	0.628	1	36.8957	41.8606	81.7339	55.3282	2.63885e+09	2638.85	33.776	17.1	0.821	1.76466	-0.475711	5.70037e+10	10.7559	-0.971577	32.6426	1.51378	968.898	0.0968898	-1.01372	44.138	1.64481	0.395
Tanzanie	2019	29	1	12.8473	99.7389	553496	15.0333	29.6802	-0.38842	0.597	0.61	1	36.7188	43.393	82.482	56.8787	2.32508e+09	2325.08	34.5	18.2773	0.789	1.70175	-0.423008	6.10267e+10	10.7855	-1.21724	33.0186	1.51876	956.226	0.0956226	-1.01944	44.3776	1.64716	0.391
Tanzanie	2020	29	1	12.6097	100	983122	15.4369	31.1603	-0.480808	0.575	0.611	1	36.8557	44.9413	83.2289	58.4289	2424250000	2424.25	35.227	25.6424	0.794	1.59647	-0.40892	6.60687e+10	10.82	-0.943765	27.963	1.44658	913.587	0.0913588	-1.03925	44.6164	1.64949	0.389
Tanzanie	2021	29	1	12.374	100	423312	15.8415	32.6535	-0.335559	0.602	0.614	1	36.8557	46.5053	83.9745	59.977	2.61805e+09	2618.05	35.954	29.7016	0.819	1.33363	-0.3969	7.06556e+10	10.8491	-1.19051	29.9152	1.47589	907.404	0.0907404	-1.0422	44.6164	1.64949	0.373
Tanzanie	2022	29	1	12.1401	100	873912	16.1949	34.1609	-0.260344	0.712	0.618	1	12.1429	48.0851	84.7188	61.5231	2.72872e+09	2728.72	36.682	31.8913	0.838	1.15251	-0.3411	7.577e+10	10.8795	-1.26467	35.0035	1.54411	910.496	0.0910496	-1.04072	44.6164	1.64949	0.402
Sénégal	2000	30	1	1.60181	97.7108	596096	5.04656	36.6398	-0.587891	0.853	0.834	1	16.6667	40.3754	88.5508	59.7997	6.8919e+08	689.19	40.32	0.403967	0.745	2.4101	-0.0945855	6.01319e+09	9.7791	-0.0624437	48.6801	1.68735	2051.41	0.205141	-0.687949	46.8862	1.67105	0.677
Sénégal	2001	30	1	1.53236	97.7166	564888	5.02713	37.6231	-0.430917	0.872	0.832	1	14.4048	41.9257	88.8339	60.9066	6.9669e+08	696.69	40.464	0.983794	0.738	2.42497	0.0766641	6.50782e+09	9.81344	-0.0390157	49.7206	1.69654	2183.01	0.218301	-0.660944	45.702	1.65993	0.601
Sénégal	2002	30	1	1.46306	97.7224	537754	5.00019	38.6344	-0.273944	0.872	0.832	1	19.1667	43.487	89.1174	62.0161	6.9446e+08	694.46	40.607	1.00645	0.798	2.44966	0.247914	7.0064e+09	9.8455	-0.0442445	53.1443	1.72546	2211.22	0.221122	-0.655369	45.4475	1.65751	0.684
Sénégal	2003	30	1	1.39187	97.7283	457022	4.95972	39.7038	-0.250178	0.872	0.832	1	19.1667	45.0592	89.4013	63.1942	6.2204e+08	622.04	40.898	2.10144	0.794	2.40685	-0.141307	8.76872e+09	9.94294	-0.0499485	50.8212	1.70605	2175.09	0.217509	-0.662523	44.8346	1.65161	0.684
Sénégal	2004	30	1	1.3194	95.0218	339945	4.90666	40.816	0.0295108	0.872	0.832	1	19.1667	46.6425	89.6855	64.4218	1.29541e+09	1295.41	41.306	4.38602	0.794	2.34633	0.0232224	1.00768e+10	10.0033	-0.0640803	53.6592	1.72964	2244.3	0.22443	-0.648918	45.1202	1.65437	0.684
Sénégal	2005	30	1	1.24729	95.0188	233252	4.84577	41.9259	-0.20401	0.872	0.832	1	19.1667	48.2368	89.9701	65.6454	8.4279e+08	842.79	41.714	4.78668	0.797	2.33918	-0.0353757	1.1009e+10	10.0417	-0.0523273	54.9032	1.7396	2270.26	0.227026	-0.643925	45.5825	1.6588	0.684
Sénégal	2006	30	1	1.17552	95.023	136248	4.77713	43.0341	-0.264317	0.872	0.832	1	22	49.8421	90.255	66.8656	1.01317e+09	1013.17	42.124	5.61174	0.797	2.32793	-0.373094	1.16979e+10	10.0681	-0.210614	54.1362	1.73349	2172.19	0.217219	-0.663102	44.097	1.64441	0.684
Sénégal	2007	30	1	1.10409	95.031	49345	4.70089	44.14	-0.244919	0.87	0.842	1	22	51.4583	90.5403	68.0818	7.8214e+08	782.14	42.535	6.89	0.805	2.32279	-0.514299	1.39942e+10	10.1459	-0.27309	59.2713	1.77284	2281.38	0.228138	-0.641802	44.1645	1.64507	0.682
Sénégal	2008	30	1	1.03301	95.0389	972584	4.61721	45.2435	-0.148591	0.868	0.84	1	22	53.0856	90.8259	69.294	9.462e+08	946.2	42.947	7.12	0.805	2.33951	-0.50016	1.6854e+10	10.2267	-0.272466	62.7618	1.7977	2277.51	0.227751	-0.642539	48.1743	1.68282	0.674
Sénégal	2009	30	1	0.962289	95.3079	906311	4.52625	46.3441	-0.205201	0.862	0.845	1	22.6667	54.7239	91.1119	70.5014	9.207e+08	920.7	43.359	7.5	0.805	2.36561	-0.490049	1.61459e+10	10.2081	-0.24389	52.3073	1.71856	2122.77	0.212277	-0.673097	48.1899	1.68296	0.676
Sénégal	2010	30	1	0.891911	95.5754	849926	4.42808	47.4423	-0.417925	0.896	0.845	1	22.6667	56.3732	91.3983	71.7047	9.8716e+08	987.16	43.773	8	0.813	2.3869	-0.641386	1.61213e+10	10.2074	-0.26413	52.4579	1.71981	2142.21	0.214221	-0.669139	48.1899	1.68296	0.68
Sénégal	2011	30	1	0.821886	95.8411	8038	4.32286	48.5378	-0.280602	0.896	0.845	1	42.6667	58.0335	91.685	72.9034	1.04548e+09	1045.48	44.188	9.8	0.813	2.52792	-0.503729	1.78143e+10	10.2508	-0.291141	57.5769	1.76025	2183.93	0.218393	-0.660762	46.5642	1.66805	0.68
Sénégal	2012	30	1	0.752224	96.1051	768234	4.2108	49.6299	-0.108322	0.894	0.85	1	42.6667	59.7048	91.9721	74.097	1.10599e+09	1105.99	44.603	10.8	0.826	2.67702	-0.258423	1.76609e+10	10.247	-0.22017	61.9753	1.79222	2091.13	0.209113	-0.679618	46.5642	1.66805	0.694
Sénégal	2013	30	1	0.682918	96.3677	742975	4.09197	50.7189	-0.0607228	0.939	0.855	1	43.3333	61.387	92.2595	75.2855	1.02586e+09	1025.86	45.019	13.1	0.835	2.96346	-0.188867	1.89187e+10	10.2769	-0.278038	60.6268	1.78266	2117.29	0.211729	-0.67422	46.5798	1.6682	0.721
Sénégal	2014	30	1	0.613968	96.6287	728058	3.96653	51.8046	-0.198223	0.942	0.857	1	42.6667	63.0803	92.5473	76.469	1.14497e+09	1144.97	45.436	17.7	0.835	3.16757	0.0588305	1.97973e+10	10.2966	-0.375638	58.4425	1.76673	2286.82	0.228682	-0.640768	46.6005	1.66839	0.722
Sénégal	2015	30	1	0.545309	96.8882	721653	3.83425	52.889	-0.120225	0.942	0.857	1	42.6667	64.7846	92.8355	77.6493	9.9211e+08	992.11	45.862	21.7	0.835	3.07015	0.0312389	1.77748e+10	10.2498	-0.377802	58.1103	1.76425	2580.88	0.258088	-0.588232	48.4496	1.68529	0.722
Sénégal	2016	30	1	0.476961	97.1463	724316	3.69534	53.9715	-0.225955	0.943	0.857	1	41.8182	66.4999	93.124	78.8258	8.3507e+08	835.07	46.296	25.6648	0.839	2.97843	-0.0243895	1.90403e+10	10.2797	-0.248547	54.1082	1.73326	2429.89	0.242989	-0.614413	48.2418	1.68342	0.721
Sénégal	2017	30	1	0.408919	97.403	735948	3.54987	55.0521	-0.0557226	0.952	0.822	1	41.8182	68.2262	93.4129	79.9985	1.0057e+09	1005.7	46.74	29.6431	0.859	2.8877	-0.114238	2.09966e+10	10.3221	-0.505878	57.7053	1.76122	2509.6	0.25096	-0.600396	48.4236	1.68506	0.7
Sénégal	2018	30	1	0.354479	97.658	744044	3.39807	56.13	-0.107358	0.943	0.805	1	41.8182	69.9635	93.7021	81.1662	1.06966e+09	1069.66	47.192	35.3	0.848	2.80046	-0.0468401	2.31167e+10	10.3639	-0.795033	61.7898	1.79092	2541.64	0.254164	-0.594887	48.6054	1.68668	0.699
Sénégal	2019	30	1	0.306864	97.9114	755514	3.24009	57.2049	0.0375764	0.942	0.781	1	43.0303	71.7118	93.9917	82.3289	1569750000	1569.75	47.653	43.4	0.837	2.71761	-0.00381422	2.3404e+10	10.3693	-0.994398	64.2363	1.80778	2753.39	0.275339	-0.560132	48.7976	1.6884	0.725
Sénégal	2020	30	1	0.259994	98.1633	776964	3.07614	58.2764	-0.143103	0.943	0.835	1	43.0303	73.4711	94.2817	83.4856	1.70827e+09	1708.27	48.122	53.3088	0.816	2.63304	-0.00738584	2.45305e+10	10.3897	-1.74648	60.0469	1.77849	2532.41	0.253241	-0.596466	48.9794	1.69001	0.74
Sénégal	2021	30	1	0.213884	98.4137	8085375	2.90635	59.3442	-0.179771	0.941	0.804	1	44.2424	75.2414	94.572	84.6361	1.3894e+09	1389.4	48.6	54.9741	0.819	2.53849	0.0421113	2.75208e+10	10.4397	-2.53645	69.376	1.84121	2505.21	0.250521	-0.601156	49.4001	1.69373	0.726
Sénégal	2022	30	1	0.16856	98.6629	850707	2.73096	60.4076	-0.157594	0.914	0.804	1	29.8246	77.0227	94.8627	85.7796	1.52197e+09	1521.97	49.086	59.9832	0.862	2.46764	-0.0287281	2.76195e+10	10.4412	-2.14146	80.0331	1.90327	2518.81	0.251881	-0.598804	49.1897	1.69187	0.688
Afrique du Sud	2000	31	1	8.21544	99.5	395121	2.81198	60.4974	-0.227865	0.88	0.934	1	29.8246	69.0494	98.7669	85.956	8.1476e+08	814.76	56.891	5.34856	0.873	0.914659	-0.910347	1.51753e+11	11.1811	-0.691653	46.2207	1.66484	25321.5	2.53215	0.40349	80.8885	1.90789	0.745
Afrique du Sud	2001	31	1	7.85683	99.5	2236466	2.81852	61.276	-0.241327	0.88	0.934	1	29.8246	69.8741	98.7894	86.4622	7.2871e+08	728.71	57.368	6.34662	0.873	0.859492	-0.910613	1.3543e+11	11.1317	-10.7851	49.1709	1.69171	25228.5	2.52285	0.401892	80.7961	1.90739	0.745
Afrique du Sud	2002	31	1	7.49488	99.5	502515	2.82177	62.0624	-0.25479	0.88	0.934	1	29.8246	70.6988	98.8119	86.9757	8.203e+08	820.3	57.898	6.71032	0.873	0.947037	-0.91008	1.29088e+11	11.1109	-1.88207	53.4655	1.72807	24361.9	2.43619	0.386711	80.8085	1.90746	0.745
Afrique du Sud	2003	31	1	7.13646	99.5	8780015	2.82339	62.8465	-0.312843	0.88	0.934	1	29.8246	71.5236	98.8344	87.4856	8.7683e+08	876.83	58.446	7.00769	0.877	0.996556	-0.911146	1.97019e+11	11.2945	-0.230592	45.7239	1.66014	26150.8	2.61508	0.417484	80.7261	1.90701	0.745
Afrique du Sud	2004	31	1	6.78501	99.5	7084363	2.8243	63.6234	-0.13173	0.87	0.933	1	32.7787	72.3483	98.8568	87.9865	7.8442e+08	784.42	58.993	8.42512	0.88	1.00742	-0.909014	2.55807e+11	11.4079	0.604002	45.6436	1.65938	28271.9	2.82719	0.451356	80.4623	1.90559	0.76
Afrique du Sud	2005	31	1	6.44097	99.5	5417793	2.82467	64.3921	-0.162092	0.88	0.932	1	32.75	73.173	98.8793	88.4775	8.3022e+08	830.22	59.536	7.48854	0.883	1.01261	-0.913279	2.88867e+11	11.4607	-5.61268	47.4278	1.67603	26507.5	2.65075	0.423369	80.3592	1.90504	0.773
Afrique du Sud	2006	31	1	6.10397	99.5	37785	2.82439	65.1531	0.0470301	0.882	0.926	1	32.75	73.9978	98.9018	88.9594	8.6262e+08	862.62	60.077	7.60714	0.882	1.02172	-0.904749	3.03859e+11	11.4827	5.3055	53.7681	1.73053	26793.6	2.67936	0.42803	79.8688	1.90238	0.772
Afrique du Sud	2007	31	1	5.77397	99.5	2166395	2.82348	65.9061	0.215347	0.882	0.926	1	33	74.8225	98.9243	89.432	8.947e+08	894.7	60.616	8.06538	0.883	1.05507	-0.921808	3.33077e+11	11.5225	-3.60468	57.1251	1.75683	27246	2.7246	0.435303	79.8704	1.90239	0.772
Afrique du Sud	2008	31	1	5.4508	99.5	580652	2.82188	66.6513	0.049529	0.877	0.926	1	33	75.6472	98.9468	89.8958	1.20666e+09	1206.66	61.154	8.43	0.881	1.1531	-0.88769	3.16131e+11	11.4999	-12.0046	65.9745	1.81938	28867.3	2.88673	0.460405	80.0501	1.90336	0.772
Afrique du Sud	2009	31	1	5.13495	99.5	9023783	2.81981	67.3879	-0.114493	0.871	0.929	1	33	76.472	98.9692	90.3499	1.22809e+09	1228.09	61.687	10	0.888	1.1939	-0.955925	3.29754e+11	11.5182	-6.31319	49.5875	1.69537	28399.3	2.83993	0.453307	79.9512	1.90282	0.77
Afrique du Sud	2010	31	1	4.82597	99.5	7493513	2.81712	68.1162	-0.029427	0.88	0.921	1	44.5	77.2967	98.9917	90.7949	1.18282e+09	1182.82	62.218	24	0.888	1.18291	-0.819456	4.17364e+11	11.6205	-3.85456	50.4061	1.70248	28270.5	2.82706	0.451334	79.8712	1.90239	0.771
Afrique du Sud	2011	31	1	4.52394	99.5	5990298	2.81387	68.836	0.0240316	0.879	0.921	1	42.25	78.1214	99	91.2308	1.49253e+09	1492.53	62.746	33.97	0.891	1.23631	-1.0924	4.58199e+11	11.6611	-4.29269	54.6364	1.73748	27576.7	2.75767	0.440542	79.4451	1.90007	0.767
Afrique du Sud	2012	31	1	4.22868	99.5	4513462	2.81	69.5473	-0.0253867	0.879	0.927	1	42.25	78.9462	99	91.6578	1.18499e+09	1184.99	63.272	41	0.891	1.47479	-1.29582	4.34401e+11	11.6379	-1.72716	55.5826	1.74494	26791.4	2.67914	0.427996	79.4179	1.89992	0.772
Afrique du Sud	2013	31	1	3.94048	99.5	306439	2.8057	70.2497	-0.0462945	0.885	0.901	1	42.25	79.7709	99	92.0754	1.36734e+09	1367.34	63.793	46.5	0.863	1.65265	-1.4006	4.00886e+11	11.603	-1.71265	58.875	1.76993	26545.9	2.65459	0.423997	79.4179	1.89992	0.759
Afrique du Sud	2014	31	1	3.65895	99.5	1641176	2.80079	70.9435	-0.146389	0.876	0.902	1	41.5	80.5956	99	92.4843	1.15345e+09	1153.45	64.312	49	0.862	1.66145	-1.60761	3.81199e+11	11.5812	1.90042	59.4996	1.77451	26433.6	2.64336	0.422157	79.4179	1.89992	0.749
Afrique du Sud	2015	31	1	3.38414	99.5	244198	2.79535	71.6285	-0.220545	0.876	0.902	1	42	79.966	98.9558	92.2767	1.64354e+09	1643.54	64.828	51.9191	0.869	2.00989	-1.72435	3.4671e+11	11.54	3.99379	56.7267	1.75379	25372.1	2.53721	0.404356	79.4179	1.89992	0.749
Afrique du Sud	2016	31	1	3.11599	99.5	8873241	2.78937	72.3045	-0.149085	0.872	0.902	1	42	79.3068	98.8299	92.0634	1.35664e+09	1356.64	65.341	54	0.87	0.940522	-1.75907	3.23586e+11	11.51	2.27517	55.8613	1.74711	26274	2.6274	0.419526	79.4179	1.89992	0.746
Afrique du Sud	2017	31	1	2.85454	99.5	7528467	2.78293	72.9715	-0.284804	0.847	0.908	1	41.8367	78.6182	98.7039	91.8447	1.13086e+09	1130.86	65.85	56.1674	0.862	0.653837	-1.75135	3.81449e+11	11.5814	5.39064	53.5359	1.72865	26075.3	2.60753	0.41623	79.4179	1.89992	0.736
Afrique du Sud	2018	31	1	2.59971	99.5	6209719	2.77603	73.6294	-0.237547	0.867	0.897	1	42.7481	77.9002	98.5779	91.6209	9.9243e+08	992.43	66.355	62.4	0.857	1.68237	-1.74286	4.05261e+11	11.6077	-1.5425	54.4855	1.73628	24785.2	2.47852	0.394192	79.4179	1.89992	0.736
Afrique du Sud	2019	31	1	2.35141	99.5	4916592	2.76868	74.2782	-0.283221	0.861	0.891	1	46.3476	77.1526	98.4518	91.3924	1.04717e+09	1047.17	66.856	69.6969	0.859	1.64957	-1.79989	3.8933e+11	11.5903	-1.97516	53.898	1.73157	25577.1	2.55771	0.407852	79.4179	1.89992	0.711
Afrique du Sud	2020	31	1	2.10953	99.5	3648492	2.76083	74.9179	-0.252867	0.865	0.893	1	46.75	76.3757	98.3256	91.1598	1.26922e+09	1269.22	67.354	72.1128	0.828	1.62216	-1.93671	3.38291e+11	11.5293	-5.08941	50.6868	1.7049	23687.9	2.36879	0.374527	79.4179	1.89992	0.714
Afrique du Sud	2021	31	1	1.87411	83.2755	2405845	2.75261	75.5483	-0.750981	0.87	0.889	1	46.5823	75.5692	98.1994	90.9231	1.04157e+09	1041.57	67.847	74.1534	0.837	1.54056	-1.83682	4.20118e+11	11.6234	-40.5572	56.0846	1.74884	23674.7	2.36747	0.374284	79.4179	1.89992	0.724
Afrique du Sud	2022	31	1	1.64505	83.3835	1188302	2.74403	76.1696	-0.681386	0.849	0.889	1	46.5	74.7333	98.0731	90.6825	1.03012e+09	1030.12	68.335	74.703	0.839	1.41397	-1.85576	4.05271e+11	11.6077	-7.03975	65.0607	1.81332	22594.4	2.25944	0.354	79.4179	1.89992	0.711
Bolivie	2000	32	4	12.6735	81.1185	207937	0.346971	34.9159	-0.237061	0.818	0.855	1	11.5385	58.0711	95.5431	81.2239	6.7756e+08	677.56	61.787	1.44276	0.654	1.80379	-0.483501	8.39786e+09	9.92417	-0.73355	45.5978	1.65894	5072.65	0.507265	-0.294765	34.2869	1.53513	0.75
Bolivie	2001	32	4	12.1957	81.8305	9738026	0.336377	36.1069	-0.261788	0.818	0.852	1	11.5385	58.9324	95.6965	81.8386	1.10104e+09	1101.04	62.306	2.12046	0.656	1.76982	-0.897213	8.14152e+09	9.91071	-0.703176	45.2278	1.65541	4264.89	0.426489	-0.370093	34.2989	1.53528	0.746
Bolivie	2002	32	4	11.7388	82.5183	742888	0.325768	37.2789	-0.286516	0.818	0.836	1	11.5385	59.7946	95.8499	82.4312	9.4399e+08	943.99	62.783	3.11719	0.691	1.75107	-0.940808	7.90549e+09	9.89793	-0.673943	49.3503	1.69329	4571.17	0.457117	-0.339972	34.442	1.53709	0.729
Bolivie	2003	32	4	11.2931	83.1935	5134106	0.314977	38.4423	-0.834885	0.811	0.857	1	18.4615	60.6576	96.0033	83.0131	1.05283e+09	1052.83	63.248	3.5086	0.691	1.74629	-0.853619	8.0824e+09	9.90754	-0.19462	51.9678	1.71573	6038.84	0.603884	-0.219047	33.829	1.52929	0.716
Bolivie	2004	32	4	10.8552	83.86	284792	0.303961	39.6007	-0.680571	0.864	0.874	1	19.2308	61.5215	96.1567	83.588	8.7745e+08	877.45	63.711	4.43992	0.691	1.73917	-0.809159	8.77345e+09	9.94317	-0.06263	57.4643	1.7594	6154.92	0.615492	-0.210777	33.8013	1.52893	0.753
Bolivie	2005	32	4	10.4258	84.517	571394	0.292744	40.7535	-0.97103	0.856	0.865	1	16.9231	62.3863	96.3102	84.1552	6.7344e+08	673.44	64.17	5.22758	0.685	1.73299	-0.741979	9.54912e+09	9.97996	0.24162	67.6419	1.83022	5926.31	0.59263	-0.227216	34.1198	1.53301	0.746
Bolivie	2006	32	4	10.004	85.1657	830276	0.281324	41.9016	-0.802563	0.816	0.858	1	16.9231	63.2519	96.4636	84.716	9.6039e+08	960.39	64.628	6.20067	0.716	1.74713	-0.431124	1.14518e+10	10.0589	-0.277763	74.5378	1.87238	6410.19	0.641019	-0.193129	34.2583	1.53477	0.727
Bolivie	2007	32	4	9.59045	85.8052	604358	0.269729	43.481	-0.852071	0.816	0.858	1	16.9231	64.1184	96.617	85.2692	4.9071e+08	490.71	65.082	10.4992	0.716	1.75023	-0.402194	1.31201e+10	10.1179	-0.363294	76.0619	1.88117	6767.98	0.676798	-0.169541	34.5149	1.53801	0.721
Bolivie	2008	32	4	9.18438	86.4364	3792186	0.257958	45.0792	-0.696566	0.816	0.858	1	16.9231	64.9858	96.7705	85.8159	5.8612e+08	586.12	65.535	12.5	0.71	1.72976	-0.528392	1.66743e+10	10.222	-0.509336	82.867	1.91838	6827.64	0.682764	-0.165729	34.6026	1.53911	0.721
Bolivie	2009	32	4	8.78647	87.0585	1550198	0.246037	46.695	-0.50611	0.816	0.857	1	16.9231	65.854	96.9239	86.3552	6.079e+08	607.9	65.984	16.8	0.733	1.71311	-0.631417	1.734e+10	10.239	-0.42004	68.6271	1.8365	6614.82	0.661482	-0.179482	34.7761	1.54128	0.717
Bolivie	2010	32	4	8.39639	87.6719	9316907	0.233974	48.3286	-0.415407	0.783	0.858	1	25.3846	66.723	97.0774	86.8874	5.8224e+08	582.24	66.43	22.4	0.745	1.69628	-0.458649	1.96497e+10	10.2934	-0.650803	75.5116	1.87801	6598.98	0.659898	-0.180523	34.6312	1.53947	0.687
Bolivie	2011	32	4	8.01385	88.277	709176	0.221778	49.9801	-0.417127	0.783	0.852	1	25.3846	67.593	97.2309	87.413	536500000	536.5	66.874	30	0.738	1.67783	-0.573696	2.39632e+10	10.3795	-0.858666	82.4804	1.91635	6716.62	0.671662	-0.172849	34.6691	1.53994	0.682
Bolivie	2012	32	4	7.63901	88.8735	4875202	0.209464	51.6492	-0.458068	0.778	0.848	1	25.3846	68.4638	97.3843	87.9317	6.8222e+08	682.22	67.315	35.34	0.747	1.65464	-0.727892	2.70845e+10	10.4327	-1.05997	84.9488	1.92916	7838.92	0.783892	-0.105744	34.7558	1.54103	0.682
Bolivie	2013	32	4	7.28341	89.4473	2693086	0.197209	53.3192	-0.328593	0.77	0.842	1	25.3846	69.3354	97.5378	88.4282	7.0934e+08	709.34	67.699	36.99	0.734	1.62957	-0.587969	3.06593e+10	10.4866	-1.74961	81.2309	1.90972	7813.69	0.781369	-0.107144	34.8361	1.54203	0.664
Bolivie	2014	32	4	6.94133	90.0053	534132	0.184918	54.9966	-0.333112	0.76	0.841	1	53.0769	70.208	97.6913	88.9096	6.8365e+08	683.65	68.047	34.6016	0.766	1.60332	-0.628803	3.29962e+10	10.5185	-0.689679	85.2645	1.93077	7770.68	0.777068	-0.109541	34.8029	1.54162	0.652
Bolivie	2015	32	4	6.60518	90.5567	8381681	0.172489	56.692	-0.270499	0.742	0.827	1	53.0769	71.0813	97.8448	89.3857	8.9872e+08	898.72	68.393	37.4868	0.764	1.57314	-0.717875	3.30002e+10	10.5185	-0.55643	67.9328	1.83208	8018.66	0.801866	-0.0958983	34.7651	1.54114	0.616
Bolivie	2016	32	4	6.27469	91.1018	6235306	0.159928	58.4055	-0.253676	0.745	0.818	1	53.0769	71.9556	97.9983	89.8568	7.9582e+08	795.82	68.738	39.6975	0.785	1.54729	-0.774886	3.39411e+10	10.5307	-0.246499	56.401	1.75129	8176.84	0.817684	-0.0874148	34.7872	1.54142	0.628
Bolivie	2017	32	4	5.95023	91.6402	4095724	0.147249	60.1364	-0.280111	0.734	0.815	1	53.0769	72.8307	98.1518	90.3225	1.06126e+09	1061.26	69.08	43.8323	0.801	1.52011	-0.701331	3.75086e+10	10.5741	-0.632781	56.7047	1.75362	7938.3	0.79383	-0.100272	34.6054	1.53914	0.621
Bolivie	2018	32	4	5.63066	92.1733	1960385	0.134453	61.8864	-0.286621	0.742	0.803	1	53.0769	73.7066	98.3053	90.7843	7.8006e+08	780.06	69.425	44.2861	0.791	1.48747	-0.688641	4.02876e+10	10.6052	-0.386834	57.11	1.75671	8088.34	0.808834	-0.0921405	34.826	1.5419	0.598
Bolivie	2019	32	4	5.31607	92.701	9829307	0.135047	63.6553	-0.72834	0.6	0.757	1	53.0769	74.5452	98.4568	91.2291	7.7647e+08	776.47	69.773	47.4748	0.765	1.4575	-0.781366	4.08953e+10	10.6117	0.264951	56.3973	1.75126	7903.12	0.790312	-0.102201	34.8814	1.54259	0.477
Bolivie	2020	32	4	5.00667	93.223	7702893	0.135617	65.4427	-0.453467	0.623	0.736	1	46.1538	75.3837	98.6083	91.6695	3.6033e+08	360.33	70.123	59.9401	0.767	1.33974	-0.844825	3.66298e+10	10.5638	1.01836	45.5033	1.65804	6540.53	0.654053	-0.184387	34.8814	1.54259	0.332
Bolivie	2021	32	4	4.70252	93.7393	5581365	0.136162	67.2485	-0.278774	0.768	0.793	1	46.1538	76.2222	98.7598	92.1056	5.0682e+08	506.82	70.475	65.9774	0.822	1.19349	-0.8838	4.04061e+10	10.6064	-0.492247	59.0214	1.77101	7062.15	0.706215	-0.151063	34.8814	1.54259	0.606
Bolivie	2022	32	4	4.40352	94.2501	3464241	0.136682	69.0727	-0.191909	0.756	0.775	1	46.1538	77.0607	98.9113	92.5375	3.5676e+08	356.76	70.83	73.2831	0.815	1.19027	-0.8897	4.40083e+10	10.6435	-0.0870313	67.7559	1.83095	6801.34	0.680134	-0.167405	34.8814	1.54259	0.595
Botswana	2000	33	1	2.98743	95.644	3685982	20.4743	53.7396	1.07435	0.812	0.883	1	17.0213	53.9947	94.3278	75.4596	4.751e+07	47.51	53.219	2.90267	0.757	2.13211	0.858369	5.78833e+09	9.76255	-0.0549186	91.9247	1.96343	8308.66	0.830866	-0.080469	45.7908	1.66078	0.707
Botswana	2001	33	1	2.84927	95.7569	3937901	20.2368	54.7451	0.973808	0.812	0.883	1	17.0213	54.0196	94.2241	75.7549	45500000	45.5	54.062	3.43089	0.757	2.05764	0.934729	5.48961e+09	9.73954	0.348971	87.5251	1.94213	8561.1	0.85611	-0.0674705	45.5261	1.65826	0.707
Botswana	2002	33	1	2.73336	95.8383	4283524	20.1057	55.6041	0.873264	0.812	0.883	1	17.0213	54.0445	94.1204	75.9139	5.767e+07	57.67	54.57	3.38592	0.757	1.88081	0.624538	5.43886e+09	9.73551	-0.365114	91.8358	1.96301	8817.65	0.881765	-0.0546472	45.6055	1.65902	0.707
Botswana	2003	33	1	2.62205	95.9131	4648414	19.9895	56.4323	1.10494	0.812	0.883	1	17.0213	54.0694	94.0167	76.052	3.939e+07	39.39	55.029	3.34519	0.757	1.75963	1.24492	7.51158e+09	9.87573	-0.211973	85.834	1.93366	8856.52	0.885652	-0.0527367	45.5173	1.65818	0.707
Botswana	2004	33	1	2.51244	95.9855	5020458	19.8726	57.2488	0.916689	0.823	0.884	1	11.1111	54.0943	93.913	76.1889	6.202e+07	62.02	55.488	3.30489	0.721	1.75338	0.875726	8.95747e+09	9.95219	-0.429642	90.9978	1.95903	8571.5	0.85715	-0.0669432	45.572	1.6587	0.713
Botswana	2005	33	1	2.40471	96.0553	540019	19.7559	58.0524	1.06357	0.823	0.887	1	11.1111	54.1192	93.8093	76.3234	6.156e+07	61.56	55.944	3.26255	0.721	1.79499	1.16079	9.91891e+09	9.99646	-0.363608	88.5054	1.94697	8948.1	0.89481	-0.048269	45.5508	1.6585	0.717
Botswana	2006	33	1	2.29867	96.1226	5787013	18.7153	58.8441	1.01711	0.818	0.887	1	11.1111	55.7943	94.0657	77.3794	8.142e+07	81.42	56.4	4.28993	0.721	1.86518	0.936531	9.91916e+09	9.99647	-0.437105	86.6124	1.93758	9380.95	0.938095	-0.0277533	45.5296	1.65829	0.72
Botswana	2007	33	1	2.1432	96.2604	5964214	17.362	59.9949	1.05614	0.827	0.887	1	11.1111	57.471	94.3213	78.8176	1.2092e+08	120.92	57.928	5.28	0.721	1.93813	0.993911	1.05673e+10	10.024	-0.46299	98.4965	1.99342	9445.07	0.944507	-0.0247947	45.4961	1.65797	0.725
Botswana	2008	33	1	1.99397	96.3893	6167287	16.0472	61.1112	1.03311	0.815	0.887	1	11.1111	59.1493	94.576	80.2084	7.9393e+08	793.93	59.444	6.25	0.726	2.00821	1.02253	1.07308e+10	10.0306	-0.612317	99.0082	1.99567	9627.65	0.962765	-0.0164796	45.6672	1.6596	0.714
Botswana	2009	33	1	1.8514	96.5088	6398196	14.7736	62.1889	0.953861	0.811	0.894	1	11.1111	60.829	94.83	81.5482	3.3991e+08	339.91	60.937	6.15	0.705	2.06588	0.927734	1.01185e+10	10.0051	-0.200879	88.4808	1.94685	8820.02	0.882002	-0.0545304	45.7325	1.66023	0.715
Botswana	2010	33	1	1.71516	96.6193	6655391	13.5395	63.2299	0.99121	0.811	0.894	1	7.93651	62.5102	95.0832	82.8397	1.7313e+08	173.13	62.412	6	0.721	2.10944	1.00335	1.26373e+10	10.1017	-0.217483	94.639	1.97607	8901.27	0.890127	-0.0505482	45.632	1.65927	0.714
Botswana	2011	33	1	1.5853	96.7208	6939168	12.3456	64.2326	1.06445	0.813	0.894	1	7.93651	64.193	95.3356	84.0822	1.3377e+08	133.77	63.865	9	0.721	1.96877	0.966567	1.51106e+10	10.1793	-0.302917	98.9615	1.99547	9151.25	0.915126	-0.0385193	45.7467	1.66036	0.713
Botswana	2012	33	1	1.48198	96.7845	7335317	11.3166	65.0373	1.10404	0.813	0.894	1	7.93651	65.8773	95.5872	85.1198	8.183e+07	81.83	64.768	16	0.718	1.67774	0.906515	1.39075e+10	10.1432	-0.138128	111.875	2.04873	8872.2	0.88722	-0.0519687	45.6778	1.65971	0.713
Botswana	2013	33	1	1.38563	96.8383	7760811	10.3307	65.7908	1.10235	0.793	0.906	1	7.93651	67.5631	95.838	86.1035	1.1889e+08	118.89	65.572	30	0.748	1.50922	0.893461	1.42717e+10	10.1545	0.0174962	125.783	2.09962	8641.08	0.864108	-0.0634319	45.669	1.65962	0.712
Botswana	2014	33	1	1.29257	96.8874	8200006	9.36495	66.5215	1.01185	0.791	0.9	1	9.52381	69.2504	96.0881	87.062	1.073e+08	107.3	66.368	36.7447	0.751	1.45442	0.812724	1.54701e+10	10.1895	-0.403817	119.498	2.07736	8513.4	0.85134	-0.0698972	45.8843	1.66166	0.708
Botswana	2015	33	1	1.20276	96.932	865274	8.41947	67.2289	1.03137	0.777	0.895	1	9.52381	70.9392	96.3373	87.9953	7.454e+07	74.54	67.155	37.3121	0.748	1.42753	0.780862	1.35307e+10	10.1313	-0.195309	112.901	2.0527	10171.9	1.01719	0.00740358	45.633	1.65928	0.689
Botswana	2016	33	1	1.11617	96.972	9118804	7.49405	67.913	0.979198	0.777	0.895	1	9.52381	72.6295	96.5857	88.9037	1.0117e+08	101.17	67.933	39.363	0.748	1.4197	0.866951	1.50826e+10	10.1785	0.0271711	100.465	2.00201	10964.4	1.09644	0.0399831	45.633	1.65928	0.687
Botswana	2017	33	1	1.0328	97.0074	959832	6.58886	68.5731	1.0093	0.797	0.862	1	9.52381	74.3214	96.8333	89.7871	1.1278e+08	112.78	68.7	41.4138	0.755	1.42048	0.71241	1.61052e+10	10.207	-0.261441	81.924	1.91341	9879.76	0.987976	-0.00525374	45.633	1.65928	0.679
Botswana	2018	33	1	0.952861	97.0379	92146	5.70525	69.207	0.95847	0.811	0.866	1	9.52381	76.0148	97.0801	90.6438	9.194e+07	91.94	69.446	58	0.732	1.41898	0.71906	1.70319e+10	10.2313	-0.203876	87.4551	1.94179	9597.18	0.959718	-0.0178562	45.633	1.65928	0.681
Botswana	2019	33	1	0.876209	97.0638	599651	4.84242	69.8151	1.09533	0.791	0.868	1	10.7692	77.7097	97.3261	91.4749	7.237e+07	72.37	70.172	64.8263	0.742	1.42263	0.685446	1.67259e+10	10.2234	-0.113402	83.093	1.91956	9467.98	0.946798	-0.0237425	45.6337	1.65929	0.657
Botswana	2020	33	1	0.802758	97.0852	1120596	4.7466	70.3974	1.01317	0.761	0.884	1	10.7692	77.7452	97.2169	91.5461	8.246e+07	82.46	70.877	67.4756	0.746	1.43941	0.610776	1.49603e+10	10.1749	-0.100018	77.6632	1.89022	8843.11	0.884311	-0.0533951	45.6337	1.65929	0.595
Botswana	2021	33	1	0.732411	97.1021	1654444	4.65363	70.9542	1.04141	0.812	0.884	1	10.7692	77.7807	97.1076	91.611	9.643e+07	96.43	71.56	75.2388	0.704	1.4913	0.66512	1.87509e+10	10.273	0.286136	88.7551	1.94819	9385.4	0.93854	-0.0275473	45.6337	1.65929	0.591
Botswana	2022	33	1	0.718063	97.1227	1592095	4.55516	71.4865	1.07398	0.799	0.845	1	11.1111	77.8162	96.9983	91.6703	88500000	88.5	72.224	77.3272	0.716	1.58848	0.661909	2.0322e+10	10.308	-0.699506	85.6083	1.93252	9114.25	0.911425	-0.0402789	45.6337	1.65929	0.574
Burkina Faso	2000	34	1	6.30931	99.2033	719776	10.4105	8.84163	0.0598203	0.791	0.849	1	8.10811	50.6701	78.5168	55.6391	3.3006e+08	330.06	17.844	0.0770802	0.733	2.98389	0.124697	2.96837e+09	9.47252	-0.0344194	35.1229	1.54559	358.424	0.0358424	-1.4456	35.7091	1.55278	0.518
Burkina Faso	2001	34	1	6.25713	99.1737	580313	10.4217	9.13087	-0.12355	0.791	0.849	1	8.10811	50.6701	78.5168	55.8329	6.5973e+08	659.73	18.54	0.157732	0.733	3.04073	0.00640265	3.19037e+09	9.50384	-0.034414	31.6582	1.50049	386.415	0.0386415	-1.41295	38.633	1.58696	0.522
Burkina Faso	2002	34	1	5.91042	99.1449	36438	11.4582	10.0598	-0.306921	0.791	0.848	1	8.10811	50.1174	78.6461	55.6114	7.1434e+08	714.34	19.258	0.200993	0.767	3.07479	0.12032	3.62235e+09	9.55899	-0.0344247	31.3125	1.49572	392.564	0.0392564	-1.40609	39.364	1.5951	0.518
Burkina Faso	2003	34	1	5.56773	99.1167	14178	12.4904	11.0081	0.0671201	0.791	0.848	1	11.7117	49.5455	78.7753	55.3903	7.4373e+08	743.73	19.996	0.37344	0.767	3.10452	-0.107514	4.74077e+09	9.67585	-0.0344034	30.3682	1.48242	421.103	0.0421103	-1.37561	40.826	1.61094	0.516
Burkina Faso	2004	34	1	5.22912	99.0893	91179	13.5173	11.976	-0.0812375	0.791	0.848	1	11.7117	48.9546	78.9043	55.1713	8.082e+08	808.2	20.757	0.400295	0.767	3.13802	-0.149054	5.45169e+09	9.73653	-0.034446	35.4809	1.55	367.588	0.0367588	-1.43464	38.9985	1.59105	0.516
Burkina Faso	2005	34	1	4.89506	99.0625	675104	14.538	12.9611	-0.0626529	0.791	0.849	1	11.7117	48.3447	79.0332	54.954	8.5082e+08	850.82	21.537	0.469914	0.767	3.14899	-0.105527	6.14635e+09	9.78862	-0.0343608	34.1722	1.53367	378.259	0.0378259	-1.42221	40.095	1.60309	0.52
Burkina Faso	2006	34	1	4.56562	67.9709	431005	15.5511	13.9637	0.1558	0.791	0.853	1	11.7117	47.7156	79.1618	54.7404	1.06134e+09	1061.34	22.339	0.632708	0.767	3.12248	-0.310118	6.54742e+09	9.81607	-0.0345312	35.1065	1.54539	361.505	0.0361505	-1.44189	39.4518	1.59607	0.544
Burkina Faso	2007	34	1	4.2498	68.1625	214638	16.5647	14.9189	0.307009	0.791	0.85	1	15.3153	47.0676	79.2903	54.4775	8.2867e+08	828.67	22.996	0.75	0.767	3.03279	-0.329598	7.62572e+09	9.88228	-0.337377	33.7797	1.52866	496.81	0.049681	-1.30381	40.2705	1.60499	0.541
Burkina Faso	2008	34	1	3.9447	68.7252	2125	17.5818	15.8386	0.118725	0.798	0.849	1	15.3153	46.4004	79.4186	54.1709	8.2449e+08	824.49	23.534	0.92	0.785	2.94357	-0.309015	9.45144e+09	9.9755	-0.10426	35.3853	1.54882	526.817	0.0526817	-1.27834	44.3805	1.64719	0.543
Burkina Faso	2009	34	1	3.64332	69.2905	824413	18.5968	16.7713	0.0340403	0.798	0.849	1	15.3153	45.7142	79.5467	53.8608	8.9471e+08	894.71	24.079	1.13	0.785	2.93141	-0.345607	9.4507e+09	9.97546	-0.071364	40.296	1.60526	480.64	0.048064	-1.31818	43.2858	1.63635	0.539
Burkina Faso	2010	34	1	3.34565	69.8591	623669	19.609	17.7173	-0.117637	0.824	0.881	1	15.3153	45.009	79.6746	53.5482	1.10199e+09	1101.99	24.633	2.4	0.8	2.93927	-0.356885	1.01096e+10	10.0047	-0.0381876	49.0732	1.69084	509.41	0.050941	-1.29293	44.3823	1.64721	0.56
Burkina Faso	2011	34	1	3.0518	70.4298	418955	20.6178	18.6761	-0.555381	0.824	0.878	1	15.3153	44.2847	79.8024	53.2337	9.7298e+08	972.98	25.196	3	0.8	2.96974	-0.37865	1.20803e+10	10.0821	-0.0414728	57.4973	1.75965	563.346	0.0563346	-1.24922	43.2858	1.63635	0.57
Burkina Faso	2012	34	1	2.76189	71.0034	210451	21.6227	19.6466	-0.573129	0.828	0.869	1	15.748	43.5413	79.93	52.9176	1.19414e+09	1194.14	25.767	3.72503	0.801	3.03188	-0.482447	1.2561e+10	10.099	-0.256326	61.2386	1.78703	644.375	0.0644375	-1.19086	44.3823	1.64721	0.571
Burkina Faso	2013	34	1	2.47603	71.5356	998116	22.6232	20.6283	-0.76339	0.839	0.867	1	15.748	42.7789	80.0574	52.6003	1.07411e+09	1074.11	26.346	5	0.772	3.00842	-0.525528	1.34443e+10	10.1285	-0.432096	64.0359	1.80642	749.678	0.0749678	-1.12513	45.1133	1.6543	0.6
Burkina Faso	2014	34	1	2.19427	72.034	78168	23.6186	21.621	-0.787129	0.85	0.893	1	15.748	41.9974	80.1846	52.2827	1156750000	1156.75	26.934	6	0.767	2.97978	-0.466839	1.3943e+10	10.1444	-0.287751	58.8236	1.76955	677.646	0.0677646	-1.169	44.3823	1.64721	0.572
Burkina Faso	2015	34	1	1.91674	72.5323	561316	24.6084	22.6237	-0.609127	0.87	0.891	1	9.44882	41.1968	80.3116	51.9651	1.14376e+09	1143.76	27.53	6.55	0.735	2.97235	-0.299045	1.18322e+10	10.0731	-0.217797	59.0892	1.77151	836.03	0.083603	-1.07778	44.3823	1.64721	0.375
Burkina Faso	2016	34	1	1.64353	73.0307	336985	25.5921	23.6359	-0.868711	0.883	0.841	1	9.44882	40.3772	80.4385	51.6481	1.17728e+09	1177.28	28.134	7.14	0.743	2.93481	-0.169877	1.28334e+10	10.1083	-0.340113	57.8932	1.76263	780.077	0.0780077	-1.10786	44.3823	1.64721	0.69
Burkina Faso	2017	34	1	1.37477	73.5293	10933	26.5696	24.6559	-0.927886	0.879	0.85	1	11.0236	39.5386	80.5651	51.3308	1.00046e+09	1000.46	28.743	7.79	0.752	2.86566	-0.13878	1.4107e+10	10.1494	0.00769613	59.2688	1.77283	878.578	0.0878578	-1.05622	44.3823	1.64721	0.691
Burkina Faso	2018	34	1	1.1105	74.0277	878094	27.5402	25.6836	-1.06026	0.853	0.85	1	11.0236	38.6808	80.6916	51.0144	1.27431e+09	1274.31	29.358	8.5	0.764	2.76868	-0.131607	1.58901e+10	10.2011	-0.200702	60.5956	1.78244	950.387	0.0950387	-1.0221	44.3823	1.64721	0.676
Burkina Faso	2019	34	1	0.850797	74.5259	643007	28.5033	26.7186	-1.30219	0.826	0.86	1	13.3858	37.804	80.8179	50.6996	1.21662e+09	1216.62	29.98	9.27181	0.679	2.70388	-0.219493	1.60328e+10	10.205	-0.146536	60.4087	1.7811	946.957	0.0946957	-1.02367	44.3823	1.64721	0.661
Burkina Faso	2020	34	1	0.595734	75.0241	404509	29.4588	27.7597	-1.53798	0.826	0.877	1	6.29921	36.9082	80.9441	50.3863	1.83812e+09	1838.12	30.607	15.5971	0.636	2.68879	-0.122199	1.7725e+10	10.2486	0.091639	60.7398	1.78347	878.981	0.0878981	-1.05602	44.3823	1.64721	0.659
Burkina Faso	2021	34	1	0.345371	75.5219	16233	29.4697	28.8068	-1.64294	0.811	0.89	1	6.29921	35.9933	81.07	50.0753	1.61054e+09	1610.54	31.24	18.114	0.603	2.65038	-0.0825075	1.96975e+10	10.2944	0.0368381	62.4204	1.79533	904.726	0.0904726	-1.04348	44.3823	1.64721	0.626
Burkina Faso	2022	34	1	0.113025	76.0195	903662	29.4774	29.8586	-1.81537	0.749	0.789	1	16.9014	35.0593	81.1958	49.7663	1.44662e+09	1446.62	31.877	19.9237	0.547	2.55999	-0.111639	1.88202e+10	10.2746	-0.646208	64.8439	1.81187	891.854	0.0891854	-1.04971	44.3823	1.64721	0.296
Burundi	2000	35	1	15.4097	76.5159	505355	19.4219	45.8832	-2.01407	0.523	0.456	1	14.4068	46.986	82.3847	49.905	1.5608e+08	156.08	8.246	0.0772484	0.593	2.04172	-0.824704	8.70486e+08	8.93976	-0.0116832	22.5537	1.35322	261.958	0.0261958	-1.58177	72.7025	1.86155	0.191
Burundi	2001	35	1	14.7795	77.0114	540636	19.4453	45.9762	-2.14942	0.542	0.456	1	14.4068	47.6335	82.7845	50.6076	2.4755e+08	247.55	8.461	0.106001	0.598	2.47512	-0.817025	8.76795e+08	8.9429	2.28818e-06	20.964	1.32148	217.609	0.0217609	-1.66232	72.0794	1.85781	0.193
Burundi	2002	35	1	14.1498	77.5062	574412	19.4664	46.0715	-2.28477	0.614	0.503	1	14.4068	48.2835	83.184	51.3136	2.7883e+08	278.83	8.682	0.118228	0.611	2.79414	-0.759897	8.25395e+08	8.91666	-0.00584048	21.6738	1.33594	200.193	0.0200193	-1.69855	71.4174	1.8538	0.207
Burundi	2003	35	1	13.5206	77.9998	606779	19.4853	46.169	-2.24483	0.669	0.503	1	18.4358	48.9361	83.583	52.0224	3.1865e+08	318.65	8.908	0.201273	0.619	3.13736	-0.874153	7.84654e+08	8.89468	-4.61843e-06	27.3763	1.43737	157.229	0.0157229	-1.80347	71.3785	1.85357	0.211
Burundi	2004	35	1	12.8918	78.4923	637695	19.502	46.0745	-2.52276	0.669	0.499	1	18.4358	49.5912	83.9816	52.7341	4.5185e+08	451.85	9.139	0.34906	0.619	3.71466	-0.978405	9.15257e+08	8.96154	-4.46907e-05	31.5761	1.49936	174.654	0.0174654	-1.75782	71.9626	1.85711	0.214
Burundi	2005	35	1	12.2636	78.9833	667147	19.5166	45.9781	-1.52338	0.672	0.537	1	30.5085	50.2489	84.3798	53.4486	4.4976e+08	449.76	9.375	0.542143	0.663	3.6998	-0.95718	1.11711e+09	9.0481	-0.000584702	35.1	1.54531	145.987	0.0145987	-1.83569	70.8333	1.85024	0.299
Burundi	2006	35	1	11.636	70.085	694973	19.5288	45.8797	-1.42777	0.65	0.585	1	30.5085	50.9091	84.7775	54.1662	5.0874e+08	508.74	9.617	0.657593	0.664	3.58003	-1.1015	1.27338e+09	9.10496	-3.15938e-05	42.4	1.62737	163.211	0.0163211	-1.78725	70.9502	1.85095	0.417
Burundi	2007	35	1	11.0089	70.6798	721269	19.539	45.7794	-1.37793	0.646	0.571	1	30.5085	51.5718	85.1749	54.8864	4.2456e+08	424.56	9.864	0.7	0.67	3.67179	-1.16698	1.3562e+09	9.13232	-0.000465213	38.8	1.58883	246.2	0.02462	-1.60871	71.067	1.85167	0.411
Burundi	2008	35	1	10.3823	71.2758	745748	19.5467	45.6768	-1.6365	0.647	0.556	1	30.5085	52.2371	85.5718	55.6099	4.604e+08	460.4	10.118	0.81	0.674	4.1121	-1.08823	1.61184e+09	9.20732	-0.00325169	47.2	1.67394	155.427	0.0155427	-1.80847	71.1838	1.85238	0.408
Burundi	2009	35	1	9.75648	71.8727	768767	19.5526	45.5719	-1.27144	0.636	0.536	1	30.5085	52.9049	85.9683	56.3356	5.4049e+08	540.49	10.376	0.9	0.67	5.07844	-1.13256	1.78146e+09	9.25077	-0.000348405	35.8	1.55388	149.196	0.0149196	-1.82624	71.3006	1.85309	0.4
Burundi	2010	35	1	9.13116	72.4705	789769	19.5559	45.4645	-1.62596	0.552	0.436	1	32.0755	53.5753	86.3644	57.0647	6.617e+08	661.7	10.642	1	0.648	4.67948	-1.1689	2.03214e+09	9.30795	-0.000780582	39.5	1.5966	199.676	0.0199676	-1.69967	71.3785	1.85357	0.32
Burundi	2011	35	1	8.50646	73.0692	808847	19.557	45.3545	-1.8072	0.571	0.409	1	30.4762	54.2482	86.76	57.7969	5.7344e+08	573.44	10.915	1.11	0.64	3.54274	-1.20837	2.23582e+09	9.34944	-0.003355	43	1.63347	226.621	0.0226621	-1.6447	73.3256	1.86526	0.29
Burundi	2012	35	1	7.88249	73.6691	826102	19.556	45.2416	-1.70474	0.571	0.409	1	30.4762	54.9237	87.1552	58.5317	5.4068e+08	540.68	11.194	1.22	0.645	3.52997	-1.46861	2.33334e+09	9.36798	-0.00060492	43.7054	1.64053	205.988	0.0205988	-1.68616	75.2726	1.87664	0.29
Burundi	2013	35	1	7.25909	74.2699	841075	19.5524	45.1258	-1.35028	0.561	0.392	1	30.4762	55.6017	87.5501	59.27	5.6751e+08	567.51	11.482	1.26422	0.63	3.55111	-1.42651	2.45161e+09	9.38945	-0.11656	46.6041	1.66842	216.881	0.0216881	-1.66378	79.1667	1.89854	0.279
Burundi	2014	35	1	6.6365	74.8719	854142	19.5468	45.0068	-0.784407	0.537	0.368	1	30.4762	56.2823	87.9445	60.0108	5.2404e+08	524.04	11.776	1.04239	0.644	3.34586	-1.26825	2.70578e+09	9.43229	-0.0917007	42.995	1.63342	196.128	0.0196128	-1.70746	79.1667	1.89854	0.271
Burundi	2015	35	1	6.01465	75.4748	86499	19.5389	44.8845	-1.93745	0.213	0.267	1	36.3636	56.9654	88.3384	60.7546	4.2327e+08	423.27	12.078	2	0.595	2.18871	-1.28704	3.104e+09	9.49192	-0.00725443	22.8383	1.35866	193.754	0.0193754	-1.71275	79.1667	1.89854	0.199
Burundi	2016	35	1	5.39357	76.0791	873574	19.5287	44.7586	-1.96438	0.123	0.171	1	36.3636	57.651	88.732	61.5013	8.474e+08	847.4	12.388	2.2	0.556	1.62902	-1.27876	2.64449e+09	9.42234	0.000606808	23.0437	1.36255	208.43	0.020843	-1.68104	79.1667	1.89854	0.167
Burundi	2017	35	1	4.77332	76.6847	879851	19.5163	44.629	-2.00258	0.087	0.146	1	36.3636	58.3392	89.1251	62.2509	4.8949e+08	489.49	12.706	2.66075	0.58	2.2873	-1.3185	2.72359e+09	9.43514	-0.223686	22.2403	1.34714	246.9	0.02469	-1.60748	79.1667	1.89854	0.157
Burundi	2018	35	1	4.16985	77.2914	867863	19.5017	44.4954	-1.57028	0.089	0.145	1	36.3636	59.0299	89.5178	63.0031	4.8397e+08	483.97	13.032	4	0.574	2.98382	-1.47827	2.66718e+09	9.42605	-0.00666353	26.5997	1.42488	290.769	0.0290769	-1.53645	79.1667	1.89854	0.159
Burundi	2019	35	1	3.60917	77.8998	81161	19.4849	44.3577	-1.62506	0.1	0.145	1	36.3636	59.7232	89.9101	63.758	6.0538e+08	605.38	13.366	6.1	0.58	3.26425	-1.49697	2.57652e+09	9.41103	-0.0295417	29.0262	1.46279	309.341	0.0309341	-1.50956	79.1667	1.89854	0.161
Burundi	2020	35	1	3.59492	78.5093	758261	19.4397	44.4548	-1.54235	0.114	0.193	1	38.2114	60.2817	90.3456	64.4029	5.1121e+08	511.21	13.708	9.17302	0.639	2.86708	-1.5634	2.64968e+09	9.42319	-0.0200907	26.7733	1.4277	289.066	0.0289066	-1.539	79.1667	1.89854	0.17
Burundi	2021	35	1	3.58034	79.1204	703658	19.3934	44.5545	-1.2584	0.152	0.242	1	38.2114	60.8402	90.7811	65.0493	6.0824e+08	608.24	14.058	10.1846	0.629	2.67248	-1.59966	2.7758e+09	9.44339	-0.0212434	28.8187	1.45967	293.889	0.0293889	-1.53182	79.1667	1.89854	0.184
Burundi	2022	35	1	3.56539	79.7329	647652	19.346	44.657	-1.19245	0.231	0.227	1	38.2114	61.3987	91.2165	65.6976	6.0018e+08	600.18	14.417	11.275	0.685	2.66016	-1.51818	3.33872e+09	9.52358	-0.0233231	28.3153	1.45202	291.477	0.0291477	-1.5354	79.1667	1.89854	0.192
Cap vert	2000	36	1	0.451602	99.2255	258181	11.1604	36.828	1.2236	0.865	0.91	1	11.1111	69.0093	88.3944	79.3678	1.6095e+08	160.95	53.435	1.82244	0.716	1.51097	1.12716	5.39227e+08	8.73177	-0.0328061	87.5206	1.94211	2981.49	0.298149	-0.525567	17.6179	1.24595	0.764
Cap vert	2001	36	1	0.421189	99.2236	99639	11.0977	39.1911	0.976611	0.865	0.91	1	11.1111	69.2917	88.3944	79.6628	1.3671e+08	136.71	54.291	2.68533	0.724	1.52716	0.487447	5.6309e+08	8.75058	-0.00858964	92.1637	1.96456	3263.99	0.326399	-0.486251	18.1141	1.25802	0.762
Cap vert	2002	36	1	0.391647	99.2217	944857	11.0343	41.5375	0.729622	0.877	0.91	1	11.1111	69.5741	88.3944	79.9528	1.5062e+08	150.62	55.146	3.51876	0.763	1.45645	0.495939	6.20507e+08	8.79275	-0.0147889	101.09	2.00471	3492.7	0.34927	-0.456838	18.3623	1.26393	0.766
Cap vert	2003	36	1	0.362994	99.2218	794014	10.9704	43.8664	0.918949	0.877	0.91	1	11.1111	69.8565	88.3944	80.2372	2.0118e+08	201.18	55.997	4.32489	0.763	1.3477	0.478955	8.1326e+08	8.91023	-0.0383688	98.7684	1.99462	3421.96	0.342196	-0.465725	18.3623	1.26393	0.766
Cap vert	2004	36	1	0.333453	99.222	4215555	10.9216	46.1785	1.0393	0.877	0.91	1	11.1111	70.1389	88.6474	80.6603	1.8347e+08	183.47	56.846	5.31883	0.763	1.2568	0.338964	9.2494e+08	8.96611	-0.0676383	101.567	2.00675	3692	0.3692	-0.432738	18.6104	1.26976	0.766
Cap vert	2005	36	1	0.304752	99.2222	46421	10.8729	48.4726	0.754639	0.877	0.91	1	11.1111	70.4213	88.9004	81.0817	2.0357e+08	203.57	57.689	6.07409	0.762	1.19132	0.590596	9.72242e+08	8.98777	-0.0805054	104.344	2.01847	5685.3	0.56853	-0.245247	18.6104	1.26976	0.766
Cap vert	2006	36	1	0.276865	90.2902	668447	10.8242	50.7498	0.962325	0.877	0.911	1	15.2778	70.7037	89.1534	81.5021	1.6644e+08	166.44	58.529	6.80891	0.782	1.1504	0.838406	1.10757e+09	9.04437	-0.131788	117.817	2.07121	5967.7	0.59677	-0.224193	18.8586	1.27551	0.778
Cap vert	2007	36	1	0.249804	90.4792	2878566	10.7756	53.0093	0.87726	0.885	0.911	1	18.0556	70.9861	89.4064	81.9209	1.5583e+08	155.83	59.363	8.28322	0.793	1.10689	0.918705	1.64962e+09	9.21738	-0.191413	94.2062	1.97408	6573.91	0.657391	-0.182176	18.8586	1.27551	0.783
Cap vert	2008	36	1	0.223546	90.6635	904463	10.727	55.2522	0.813386	0.885	0.911	1	18.0556	71.2685	89.6593	82.3387	2.0672e+08	206.72	60.194	14	0.801	1.03555	0.900169	1.95962e+09	9.29217	-0.213736	90.9664	1.95888	6589.22	0.658922	-0.181166	19.3548	1.28679	0.786
Cap vert	2009	36	1	0.198112	90.843	518736	10.679	57.4769	0.818449	0.885	0.911	1	18.0556	71.5509	89.9123	82.7543	2.0415e+08	204.15	61.016	21	0.801	0.950085	0.892972	1.85233e+09	9.26772	-0.124107	80.461	1.90559	6177.15	0.617715	-0.209212	19.3548	1.28679	0.786
Cap vert	2010	36	1	0.173521	91.245	1313295	10.6323	59.6819	0.840973	0.88	0.911	1	18.0556	71.8333	90.1653	83.1663	3.4453e+08	344.53	61.821	30	0.797	0.717182	0.877153	1.82475e+09	9.2612	-0.116159	85.5484	1.93221	6542.75	0.654275	-0.18424	19.3548	1.28679	0.782
Cap vert	2011	36	1	0.150703	91.6488	7647586	10.6168	61.8007	0.722605	0.88	0.912	1	20.8333	72.1157	90.4183	83.5222	2.4392e+08	243.92	62.322	32	0.805	0.325686	0.924243	2.04682e+09	9.31108	-0.100838	90.5565	1.95692	7692.89	0.769289	-0.11391	19.3548	1.28679	0.791
Cap vert	2012	36	1	0.128365	92.0547	396542	10.6013	63.9531	0.809086	0.88	0.912	1	20.8333	72.3981	90.6713	83.8775	2.5887e+08	258.87	62.821	34.74	0.805	0.0992767	0.88568	1.91308e+09	9.28173	-0.116951	90.6499	1.95737	6820.05	0.682005	-0.166212	20.8437	1.31897	0.792
Cap vert	2013	36	1	0.106506	92.4623	267563	10.5858	66.0992	0.778	0.898	0.912	1	20.8333	72.6805	90.9242	84.2319	248500000	248.5	63.317	37.5	0.803	0.0527251	0.851966	2.02891e+09	9.30726	-0.0565252	86.1699	1.93536	6636.52	0.663652	-0.17806	20.8437	1.31897	0.802
Cap vert	2014	36	1	0.0851214	92.872	6554284	10.5705	68.2389	0.350779	0.898	0.912	1	20.8333	72.9629	91.1772	84.5855	2.3427e+08	234.27	63.81	40.26	0.803	0.019716	0.970863	2.04193e+09	9.31004	-0.168141	91.3039	1.96049	7077.26	0.707726	-0.150135	19.603	1.29232	0.802
Cap vert	2015	36	1	0.0642077	93.2832	282571	10.2852	70.3717	0.85582	0.895	0.912	1	20.8333	73.2453	91.4302	84.9382	178000000	178	64.3	42.683	0.808	0.0132719	0.929723	1.74986e+09	9.243	-0.111989	94.0085	1.97317	6915.4	0.69154	-0.160183	19.603	1.29232	0.798
Cap vert	2016	36	1	0.0437633	93.6951	90847	9.80549	72.4969	0.87119	0.886	0.912	1	23.6111	74.3562	91.6832	85.5813	1.324e+08	132.4	64.784	50.3228	0.807	0.0312211	0.844147	1.84979e+09	9.26712	-0.118484	95.3781	1.97945	7142.14	0.714214	-0.146171	19.603	1.29232	0.802
Cap vert	2017	36	1	0.02378	94.0845	5332294	9.33619	74.6143	0.762866	0.879	0.912	1	23.6111	75.8071	91.9362	86.3331	1.3774e+08	137.74	65.261	57.1621	0.806	0.0661175	0.796454	1.99674e+09	9.30032	-0.0958277	100.052	2.00023	7489.28	0.748928	-0.12556	19.603	1.29232	0.798
Cap vert	2018	36	1	0.00424802	94.4751	1568112	8.87709	76.7237	0.833262	0.863	0.895	1	23.6111	77.2668	92.1891	87.0755	90000000	90	65.732	59.5	0.816	0.101724	0.755424	2.2051e+09	9.34343	-0.0942188	105.868	2.02476	7495.77	0.749577	-0.125184	19.603	1.29232	0.781
Cap vert	2019	36	1	0.014014	94.8667	9969945	8.41213	78.825	0.859627	0.871	0.895	1	23.6111	78.7354	92.4421	87.8086	1.6693e+08	166.93	66.195	61.9434	0.811	0.134109	0.851013	2.25218e+09	9.3526	-0.10693	103.603	2.01537	7383.93	0.738393	-0.131713	19.603	1.29232	0.786
Cap vert	2020	36	1	0.00913102	95.2595	8678048	7.95462	80.9181	0.874232	0.874	0.906	1	25	80.213	92.6951	88.5326	168250000	168.25	66.652	69.3734	0.815	0.111783	0.846104	1.82157e+09	9.26044	-0.06366	78.3935	1.89428	6949.68	0.694968	-0.158035	19.603	1.29232	0.795
Cap vert	2021	36	1	0.0115725	95.6532	7416263	7.43322	83.0031	0.894368	0.876	0.906	1	38.8889	81.6995	92.9481	89.2475	1.4524e+08	145.24	67.102	71.3752	0.829	0.382032	1.01638	2.05184e+09	9.31214	-0.0920936	77.4551	1.88905	7249.5	0.72495	-0.139692	19.603	1.29232	0.776
Cap vert	2022	36	1	0.0103518	96.0478	70471	7.42457	83.0453	0.927069	0.854	0.893	1	38.8889	83.1949	93.283	90.0089	8.656e+07	86.56	67.545	72.1021	0.831	0.596688	0.959875	2.247e+09	9.3516	-0.103425	96.9941	1.98675	7099.59	0.709959	-0.148767	19.603	1.29232	0.754
Egypte	2000	37	2	0.0454778	93.9113	577167	0.653936	91.9746	0.0497975	0.357	0.208	1	1.98238	98.4929	99	98.9934	2.15449e+09	2154.49	42.797	0.641265	0.376	2.07183	-0.492668	9.98385e+10	10.9993	-1.184	39.0179	1.59126	7965.85	0.796585	-0.098768	3.30604	0.519308	0.219
Egypte	2001	37	2	0.0438819	94.4135	534252	0.629053	92.1887	-0.182187	0.357	0.212	1	2.42291	98.3998	99	98.9226	2.07005e+09	2070.05	42.843	0.838946	0.378	2.05642	-0.485453	9.66846e+10	10.9854	-0.4975	39.8104	1.6	8143.85	0.814385	-0.0891704	3.35326	0.525467	0.208
Egypte	2002	37	2	0.0422887	94.7307	491678	0.604191	92.4028	-0.414172	0.357	0.212	1	2.20264	98.3067	99	98.8519	1.98639e+09	1986.39	42.889	2.72	0.378	2.0911	-0.440158	8.51461e+10	10.9302	-0.6191	40.9871	1.61265	8202.89	0.820289	-0.0860331	3.43965	0.536514	0.208
Egypte	2003	37	2	0.040698	95.0473	44931	0.579349	92.6169	-0.640925	0.357	0.212	1	2.42291	98.2137	99	98.7813	1.41777e+09	1417.77	42.935	4.03789	0.378	2.08786	-0.530748	8.02885e+10	10.9047	-0.2167	46.1796	1.66445	8503.99	0.850399	-0.0703771	3.42458	0.534608	0.208
Egypte	2004	37	2	0.03911	95.3632	407184	0.554528	92.8311	-0.822402	0.363	0.223	1	2.86344	98.1207	99	98.7108	1.94096e+09	1940.96	42.981	11.92	0.39	2.03167	-0.583506	7.87825e+10	10.8964	-1.0944	57.8199	1.76208	8798.15	0.879815	-0.0556087	3.4939	0.54331	0.211
Egypte	2005	37	2	0.0375246	95.678	365272	0.529728	93.0452	-0.629359	0.355	0.226	1	1.98238	98.0277	99	98.6403	1.33409e+09	1334.09	43.027	12.75	0.373	1.98334	-0.5395	8.96007e+10	10.9523	-5.2836	62.9526	1.79901	8844.94	0.884494	-0.053305	3.5391	0.548893	0.212
Egypte	2006	37	2	0.0359418	95.7034	323669	0.504948	93.2594	-0.837808	0.354	0.233	1	2.0362	97.9347	99	98.5699	1.09573e+09	1095.73	43.073	13.66	0.379	1.9466	-0.737334	1.07426e+11	11.0311	-9.8944	61.5185	1.78901	9136.15	0.913614	-0.039237	3.54915	0.550124	0.212
Egypte	2007	37	2	0.0343856	98.8968	286512	0.480406	93.4714	-0.552382	0.357	0.233	1	1.80995	97.8418	99	98.4989	1.35197e+09	1351.97	43.078	16.03	0.38	1.95167	-0.73787	1.30438e+11	11.1154	-10.9133	65.0779	1.81343	9542.58	0.954258	-0.0203341	3.55417	0.550738	0.214
Egypte	2008	37	2	0.0328437	98.9027	251783	0.455985	93.6821	-0.510432	0.357	0.233	1	1.80995	97.749	99	98.4275	1.87224e+09	1872.24	43.058	18.01	0.371	1.95838	-0.765909	1.62818e+11	11.2117	-7.5744	71.6806	1.8554	9921.17	0.992117	-0.00343724	3.55819	0.551229	0.214
Egypte	2009	37	2	0.0313001	98.9086	216882	0.43154	93.8929	-0.607227	0.363	0.225	1	1.80995	97.6562	99	98.3562	1.04904e+09	1049.04	43.039	20	0.37	1.95616	-0.464863	1.89147e+11	11.2768	-6.1404	56.5534	1.75246	10077.9	1.00779	0.00337009	3.70586	0.568889	0.212
Egypte	2010	37	2	0.029756	98.9144	181988	0.40708	94.1037	-0.898418	0.377	0.225	1	12.6953	97.5634	99	98.2849	638750000	638.75	43.019	21.6	0.445	2.02764	-0.596872	2.18984e+11	11.3404	-5.2101	47.9364	1.68066	10258.9	1.02589	0.0110998	3.68778	0.566765	0.214
Egypte	2011	37	2	0.0282102	98.9202	146884	0.382597	94.3146	-1.43706	0.616	0.416	1	1.9685	97.4706	99	98.2135	4.1574e+08	415.74	43	25.6	0.368	2.20764	-0.633264	2.3599e+11	11.3729	1.1082	45.2556	1.65567	10516.6	1.05166	0.0218744	3.63655	0.560689	0.205
Egypte	2012	37	2	0.0266789	98.926	114762	0.358228	94.5237	-1.43633	0.687	0.49	1	1.9685	97.3779	99	98.1416	1.66107e+09	1661.07	42.946	26.4	0.376	2.26159	-0.579664	2.79117e+11	11.4458	-2.5866	40.7118	1.60972	10688.4	1.06884	0.0289135	3.71289	0.569713	0.297
Egypte	2013	37	2	0.0251441	98.9317	82263	0.333815	94.7329	-1.63883	0.313	0.292	1	1.9685	97.2852	99	98.0696	5.42016e+09	5420.16	42.893	29.4	0.291	2.31571	-0.614102	2.88434e+11	11.46	-3.8912	40.373	1.60609	10368	1.0368	0.0156959	3.74802	0.573802	0.186
Egypte	2014	37	2	0.0236067	98.937	49493	0.309366	94.9421	-1.63118	0.17	0.158	1	1.9685	97.1925	99	97.9976	3.57507e+09	3575.07	42.839	33.8946	0.325	2.34379	-0.575518	3.05595e+11	11.4851	-4.3595	36.9202	1.56726	9999.62	0.999962	-1.65904e-05	3.73217	0.571962	0.137
Egypte	2015	37	2	0.0220662	98.942	16447	0.284877	95.1514	-1.49933	0.161	0.159	1	1.9685	97.0999	99	97.9255	2.95689e+09	2956.89	42.785	37.8194	0.307	2.20526	-0.600907	3.29367e+11	11.5177	-6.7435	34.8459	1.54215	9943.54	0.994354	-0.00245897	3.8072	0.580606	0.156
Egypte	2016	37	2	0.0205223	98.947	9983087	0.260346	95.3608	-1.43973	0.158	0.159	1	14.9329	97.0073	98.9874	97.8534	2.94563e+09	2945.63	42.732	41.2481	0.314	2.0863	-0.590893	3.32442e+11	11.5217	-7.9002	30.2465	1.48068	10278	1.0278	0.0119096	3.75083	0.574128	0.179
Egypte	2017	37	2	0.0189676	98.952	9947431	0.235716	95.5716	-1.42965	0.155	0.153	1	14.9329	96.9147	98.9452	97.7819	1.686e+08	168.6	42.705	44.9502	0.423	1.98977	-0.495982	2.48363e+11	11.3951	-7.2097	42.8321	1.63177	10471.6	1.04716	0.0200149	3.85451	0.585969	0.179
Egypte	2018	37	2	0.0174042	98.9571	99098057	0.235748	95.7838	-1.18812	0.161	0.14	1	14.9329	96.8222	98.903	97.7108	2.21843e+09	2218.43	42.704	46.9243	0.421	1.89893	-0.514722	2.62589e+11	11.4193	-7.81781	45.911	1.66192	10286.7	1.02867	0.0122769	3.88066	0.588905	0.178
Egypte	2019	37	2	0.0158341	98.9618	98703206	0.235719	95.9975	-1.12463	0.143	0.145	1	14.9329	96.7297	98.8609	97.6404	1.85862e+09	1858.62	42.73	57.2829	0.435	1.794	-0.655318	3.18679e+11	11.5034	-8.60507	41.124	1.6141	9919.54	0.991954	-0.00350829	3.93993	0.595488	0.176
Egypte	2020	37	2	0.0142597	98.9666	9829224	0.235628	96.2125	-1.18193	0.156	0.129	1	27.4112	96.6373	98.8187	97.5705	1.64913e+09	1649.13	42.783	71.9142	0.509	1.73313	-0.810434	3.83818e+11	11.5841	-5.5253	32.1263	1.50686	9153.99	0.915399	-0.0383896	3.98915	0.60088	0.176
Egypte	2021	37	2	0.0142425	98.9714	9823998	0.235449	96.4289	-1.03286	0.151	0.138	1	27.7027	96.5449	98.7765	97.5014	7.94139e+09	7941.39	42.862	72.056	0.521	1.65838	-0.705943	4.24672e+11	11.6281	-4.7553	29.857	1.47505	9639.12	0.963912	-0.0159626	3.96454	0.598193	0.183
Egypte	2022	37	2	0.0142198	98.9763	9817117	0.235211	96.6466	-0.978701	0.161	0.14	1	27.5804	96.4525	98.7343	97.4329	6.08049e+09	6080.49	42.967	72.1981	0.542	1.56907	-0.678962	4.76748e+11	11.6783	-11.0581	36.9831	1.568	9960.06	0.996006	-0.00173794	3.97684	0.599539	0.185
Equateur	2000	38	4	8.07071	94.0794	695771	0.926143	73.0248	-0.572285	0.792	0.877	1	14.6341	72.052	93.1219	84.757	2.4801e+08	248.01	60.299	1.46219	0.757	1.73622	-0.79963	1.75395e+10	10.244	0.0234394	65.4043	1.81561	8246.84	0.824684	-0.0837124	32.477	1.51158	0.694
Equateur	2001	38	4	7.97265	94.6934	57082	0.93049	73.6823	-0.666003	0.792	0.877	1	14.6341	72.7352	93.4552	85.3327	2.7894e+08	278.94	60.799	2.67044	0.757	1.73078	-0.798193	23127055000	10.3641	-0.538569	56.1285	1.74918	8211.65	0.821165	-0.0855695	31.3456	1.49618	0.694
Equateur	2002	38	4	7.91009	95.2804	4220533	0.882525	74.294	-0.759721	0.792	0.879	1	14.6341	73.4183	93.7884	85.8681	3.6334e+08	363.34	61.118	4.2608	0.751	1.74852	-0.868261	27054197000	10.4322	-0.783261	54.7966	1.73875	7965.15	0.796515	-0.0988063	30.1578	1.4794	0.696
Equateur	2003	38	4	7.55917	95.8522	1011214	0.834734	74.8765	-0.961057	0.792	0.878	1	16	74.1015	94.1217	86.3771	2.8539e+08	285.39	61.316	4.46023	0.751	1.76411	-0.728124	30965208000	10.4909	-0.871513	52.3575	1.71898	8014.88	0.801488	-0.096103	29.1915	1.46526	0.702
Equateur	2004	38	4	7.21134	96.391	7782617	0.786112	75.4557	-0.84291	0.792	0.878	1	16	74.5423	94.4549	86.7914	2.4618e+08	246.18	61.514	4.83444	0.751	1.75235	-0.72667	35194947000	10.5465	-0.83694	56.0745	1.74877	8426.99	0.842699	-0.0743275	30.3068	1.48154	0.702
Equateur	2005	38	4	6.86677	96.9085	453498	0.736675	76.2587	-0.793962	0.792	0.878	1	16	74.9342	94.7549	87.1657	3.2096e+08	320.96	61.711	5.99426	0.751	1.72988	-0.735879	40278849000	10.6051	-0.493414	61.9582	1.7921	8767.22	0.876722	-0.0571379	30.1981	1.47998	0.702
Equateur	2006	38	4	6.52544	97.3891	1268473	0.686429	77.0609	-0.853825	0.797	0.879	1	25	75.3208	94.9627	87.4805	2.6124e+08	261.24	61.907	7.2	0.82	1.71825	-0.784096	45690762000	10.6598	-0.271429	65.8424	1.81851	9114.5	0.91145	-0.040267	29.9726	1.47672	0.701
Equateur	2007	38	4	6.18701	83.2335	798259	0.635368	77.8627	-0.815987	0.81	0.827	1	25	75.7021	95.1696	87.7922	2.5112e+08	251.12	62.104	10.8	0.826	1.70789	-0.745632	49848725000	10.6977	-0.193873	68.8506	1.83791	9420.02	0.942002	-0.0259483	29.8438	1.47485	0.671
Equateur	2008	38	4	5.8518	83.9703	467786	0.583511	78.6638	-0.728682	0.779	0.787	1	25	76.0783	95.3756	88.1005	2.5555e+08	255.55	62.3	18.8	0.833	1.7052	-0.654706	61139438000	10.7863	-1.0574	74.5903	1.87268	9883.91	0.988391	-0.00507113	29.9766	1.47678	0.632
Equateur	2009	38	4	5.51979	84.6679	135451	0.530867	79.4641	-0.673676	0.786	0.742	1	25	76.4492	95.5808	88.4055	2.4174e+08	241.74	62.495	24.6	0.856	1.70577	-0.744574	60094978000	10.7788	-0.30863	57.3473	1.75851	9482.96	0.948296	-0.0230559	30.3366	1.48197	0.615
Equateur	2010	38	4	5.19082	85.3397	801219	0.477435	80.2638	-0.586674	0.749	0.716	1	32.2581	76.8148	95.7851	88.7073	1.8015e+08	180.15	62.69	29.03	0.856	1.67709	-0.707744	68151329000	10.8335	-0.165893	65.7774	1.81808	10353.5	1.03535	0.0150861	30.1888	1.47985	0.592
Equateur	2011	38	4	4.86918	86.0104	4667115	0.423408	81.0578	-0.686558	0.744	0.723	1	32.2581	77.1753	95.9885	88.9996	1.9064e+08	190.64	62.851	31.3668	0.855	1.64154	-0.641708	78986648000	10.8976	-0.646084	70.0357	1.84532	10805	1.0805	0.0336263	29.5784	1.47098	0.587
Equateur	2012	38	4	4.55288	86.6797	1319065	0.368704	81.8482	-0.570306	0.754	0.719	1	32.2581	77.5305	96.191	89.2844	1.6363e+08	163.63	62.988	35.1351	0.855	1.59213	-0.508598	87735048000	10.9432	-0.567417	67.0029	1.82609	11233.2	1.12332	0.0505032	30.2259	1.48038	0.592
Equateur	2013	38	4	4.23871	87.3477	7957692	0.31319	82.6386	-0.178657	0.687	0.68	1	38.6861	77.8805	96.3927	89.5663	1.5702e+08	157.02	63.125	40.2791	0.852	1.49741	-0.502912	96570334000	10.9848	-0.727081	63.4333	1.80232	11417	1.1417	0.0575515	30.2504	1.48073	0.541
Equateur	2014	38	4	3.92679	88.0147	458363	0.256877	83.4289	-0.0185332	0.692	0.678	1	41.6058	78.2252	96.5934	89.8451	1.6918e+08	169.18	63.261	45.5904	0.859	1.43206	-0.741118	102717794000	11.0116	-0.77239	61.4264	1.78835	11816.2	1.18162	0.0724785	22.0446	1.3433	0.538
Equateur	2015	38	4	3.6169	88.6804	119563	0.19976	84.2194	-0.147345	0.693	0.663	1	41.6058	78.5647	96.7933	90.1213	3.6895e+08	368.95	63.398	48.9404	0.861	1.43093	-0.672377	97209558000	10.9877	-1.3227	47.828	1.67968	11610.7	1.16107	0.0648593	23.3089	1.36752	0.543
Equateur	2016	38	4	3.30922	89.3448	77951	0.141853	85.0099	-0.0917104	0.707	0.672	1	41.6058	78.899	96.9924	90.3944	2.7778e+08	277.78	63.534	54.0629	0.862	1.45809	-0.680793	97671433000	10.9898	-0.764177	40.5345	1.60782	11399.5	1.13995	0.0568876	22.2097	1.34654	0.546
Equateur	2017	38	4	2.92176	90.008	6647046	0.100401	85.8005	-0.0789321	0.726	0.72	1	37.9562	79.228	97.1905	90.6647	2.3376e+08	233.76	63.67	55.8	0.862	1.52946	-0.626105	104467486000	11.019	-0.630838	43.6177	1.63966	11658.2	1.16582	0.0666314	22.5077	1.35233	0.558
Equateur	2018	38	4	2.6237	90.6641	6456015	0.0684353	86.5928	-0.0947212	0.835	0.811	1	37.9562	79.5518	97.3877	90.9349	4.276e+08	427.6	63.821	57.5	0.867	1.71572	-0.6295	107478962000	11.0313	-1.38928	48.0093	1.68133	12100.2	1.21002	0.0827911	21.9359	1.34116	0.655
Equateur	2019	38	4	2.32712	91.3152	6255517	0.0361037	87.3866	-0.238218	0.806	0.774	1	37.9562	79.8704	97.5841	91.2047	5.5468e+08	554.68	63.986	59.2	0.848	1.68935	-0.509275	107595829000	11.0318	-0.979383	48.0828	1.68199	12160.4	1.21604	0.0849479	21.4608	1.33165	0.622
Equateur	2020	38	4	2.0323	91.9655	6044843	0.00345146	88.1818	-0.270243	0.856	0.756	1	39.4161	80.1837	97.7796	91.4743	3.6345e+08	363.45	64.166	70.7	0.871	1.18125	-0.504087	95865472000	10.9817	-1.10625	43.9893	1.64335	10374.7	1.03747	0.0159767	21.8232	1.33892	0.624
Equateur	2021	38	4	1.73959	92.6148	5824087	0.0197776	88.978	-0.257387	0.801	0.745	1	39.4161	80.4918	97.8566	91.668	3.0078e+08	300.78	64.361	70.2073	0.865	0.774314	-0.594614	107435101000	11.0311	-0.648567	53.1512	1.72551	11923.5	1.19235	0.0764044	21.642	1.3353	0.624
Equateur	2022	38	4	1.72939	93.2635	5672665	0.0116145	89.7233	-0.371224	0.822	0.783	1	38.6861	80.7946	97.7249	91.7265	3.9708e+08	397.08	64.57	69.7181	0.85	0.796724	-0.630265	116586079000	11.0666	-0.880295	61.6217	1.78973	12150.3	1.21503	0.0845853	21.7326	1.33711	0.665
Ethiopie	2000	39	1	31.8895	76.4246	612415	6.81581	2.96577	-0.946032	0.375	0.338	1	7.69231	8.7567	76.6153	18.7591	1.1019e+09	1101.9	14.74	0.0152638	0.525	3.06823	-0.906757	8.24235e+09	9.91605	-0.361412	47.2875	1.67475	287.991	0.0287991	-1.54062	30.662	1.4866	0.24
Ethiopie	2001	39	1	30.599	77.587	39464	7.77431	3.22632	-1.08594	0.38	0.347	1	7.67825	10.353	76.8977	20.2861	1.78001e+09	1780.01	14.927	0.0371624	0.525	3.03351	-0.747661	8.23133e+09	9.91547	-0.352657	47.2888	1.67476	304.547	0.0304547	-1.51635	30.6054	1.4858	0.242
Ethiopie	2002	39	1	29.3122	78.7483	179287	8.73722	3.4871	-1.22585	0.38	0.348	1	7.68528	11.9489	77.1804	21.8106	2053000000	2053	15.118	0.0724023	0.525	3.04403	-0.717909	7.85081e+09	9.89491	-0.370166	47.2861	1.67473	303.847	0.0303847	-1.51735	30.498	1.48427	0.244
Ethiopie	2003	39	1	28.0299	79.9083	967674	9.70423	3.74769	-1.4096	0.38	0.348	1	7.67825	13.5444	77.4634	23.3304	2.25432e+09	2254.32	15.31	0.105812	0.525	3.02102	-0.777412	8.62369e+09	9.93569	-0.335148	47.2916	1.67478	319.221	0.0319221	-1.49591	31.607	1.49978	0.244
Ethiopie	2004	39	1	26.7521	81.0668	75945	10.6753	4.03281	-1.31249	0.364	0.348	1	7.67825	15.1395	77.7467	24.8461	2.3308e+09	2330.8	15.504	0.155335	0.525	2.99475	-0.757493	1.01312e+10	10.0057	-0.405184	47.2805	1.67468	331.657	0.0331657	-1.47931	29.3293	1.4673	0.24
Ethiopie	2005	39	1	25.4787	82.2235	554676	11.6502	4.31725	-1.69038	0.369	0.387	1	21.4286	16.7341	78.0303	26.3576	2.42062e+09	2420.62	15.7	0.21966	0.596	2.96602	-0.772508	1.24011e+10	10.0935	-0.265112	47.3027	1.67489	370.188	0.0370188	-1.43158	29.7634	1.47368	0.255
Ethiopie	2006	39	1	24.2096	83.3785	35306	12.629	4.6012	-1.74013	0.283	0.345	1	21.9282	18.3284	78.3142	27.8655	2.40852e+09	2408.52	15.899	0.310593	0.605	2.93729	-0.650105	1.52809e+10	10.1841	-0.545257	47.2584	1.67448	394.914	0.0394914	-1.4035	30.3195	1.48172	0.24
Ethiopie	2007	39	1	22.9415	25.4981	149414	13.6114	4.88682	-1.80641	0.289	0.358	1	21.9282	19.9222	78.5984	29.3785	2418750000	2418.75	16.116	0.37	0.609	2.93016	-0.632186	1.97076e+10	10.2946	-0.222001	47.347	1.67529	424.853	0.0424853	-1.37176	31.0792	1.49247	0.242
Ethiopie	2008	39	1	21.6398	28.0064	89008	14.5949	5.19692	-1.73212	0.295	0.358	1	21.9282	21.5156	78.8829	30.987	2.97454e+09	2974.54	16.51	0.45	0.604	2.89436	-0.6664	2.70669e+10	10.4324	-0.108538	47.1698	1.67366	432.32	0.043232	-1.36419	30.5812	1.48545	0.243
Ethiopie	2009	39	1	20.347	30.5086	637291	15.5774	5.5078	-1.64107	0.293	0.345	1	21.9282	23.1087	79.1677	32.5882	3.06914e+09	3069.14	16.91	0.54	0.61	2.83966	-0.704722	3.24374e+10	10.511	-0.22146	47.5242	1.67691	434.64	0.043464	-1.36187	30.9989	1.49135	0.24
Ethiopie	2010	39	1	19.0627	33.0024	390293	16.5583	5.82002	-1.6351	0.289	0.316	1	27.7879	24.7013	79.4528	34.1837	3.7993e+09	3799.3	17.319	0.75	0.629	2.83517	-0.694109	2.99338e+10	10.4762	-0.288272	46.8154	1.67039	468.262	0.0468262	-1.32951	31.6179	1.49993	0.229
Ethiopie	2011	39	1	17.7876	35.4885	149986	17.5374	6.13344	-1.50696	0.287	0.31	1	27.7879	26.2935	79.7383	35.7719	3.61543e+09	3615.43	17.735	1.1	0.641	2.84354	-0.667877	3.19528e+10	10.5045	-0.628625	48.2329	1.68334	514.245	0.0514245	-1.28883	32.1868	1.50768	0.224
Ethiopie	2012	39	1	16.5217	37.9666	915998	18.5141	6.44846	-1.56427	0.286	0.31	1	27.7879	27.8853	80.024	37.3536	3.41876e+09	3418.76	18.16	2.9	0.634	2.8039	-0.608587	4.33107e+10	10.6366	-0.278563	45.3979	1.65704	557.104	0.0557103	-1.25406	32.3308	1.50962	0.225
Ethiopie	2013	39	1	15.2682	40.4373	69409	19.4894	6.76236	-1.40731	0.284	0.314	1	27.7879	29.4766	80.31	38.9189	4.03284e+09	4032.84	18.575	4.6	0.661	2.71847	-0.50171	4.76483e+10	10.678	-1.34388	41.4718	1.61775	632.633	0.0632633	-1.19885	32.5181	1.51212	0.225
Ethiopie	2014	39	1	14.0243	42.9091	478954	20.462	7.07794	-1.33939	0.298	0.314	1	27.7879	31.0676	80.5963	40.4771	3.67939e+09	3679.39	18.998	7.7	0.668	2.683	-0.448166	5.56122e+10	10.7452	-1.85505	40.7411	1.61003	697.629	0.0697629	-1.15638	32.706	1.51463	0.226
Ethiopie	2015	39	1	12.7904	45.4701	271118	21.4317	7.39518	-1.49694	0.29	0.312	1	38.7569	32.6582	80.883	42.0273	3.63546e+09	3635.46	19.428	13.8552	0.683	2.6848	-0.476118	6.45893e+10	10.8102	-2.62652	39.6561	1.59831	715.425	0.0715425	-1.14544	32.893	1.5171	0.229
Ethiopie	2016	39	1	11.5665	48.0157	70559	22.3978	7.71437	-1.61725	0.284	0.304	1	38.7569	34.2483	81.1699	43.5697	4.66236e+09	4662.36	19.866	15.3669	0.684	2.70788	-0.442087	7.42967e+10	10.871	-4.14294	34.8991	1.54281	807.24	0.080724	-1.093	33.0794	1.51956	0.229
Ethiopie	2017	39	1	10.3533	50.5471	878014	23.3602	8.03536	-1.67723	0.308	0.294	1	38.7569	35.838	81.4571	45.1033	4.62913e+09	4629.13	20.31	15.6	0.708	2.72524	-0.582322	8.17709e+10	10.9126	-4.01716	31.1036	1.49281	794.977	0.0794977	-1.09965	33.2639	1.52197	0.228
Ethiopie	2018	39	1	9.15061	53.0624	692987	24.3182	8.35876	-1.27461	0.447	0.424	1	38.7569	37.4274	81.7447	46.629	5.31746e+09	5317.46	20.763	15.9	0.709	2.69675	-0.505318	8.42692e+10	10.9257	-3.36042	31.1994	1.49415	823.583	0.0823583	-1.08429	33.5852	1.52615	0.273
Ethiopie	2019	39	1	7.95886	55.5623	515768	25.2714	8.68474	-1.30376	0.626	0.541	1	38.7569	39.0163	82.0325	48.1465	5.11769e+09	5117.69	21.225	16	0.727	2.69124	-0.434499	9.59126e+10	10.9819	-2.54874	28.8153	1.45962	921.991	0.0921991	-1.03527	33.8389	1.52942	0.333
Ethiopie	2020	39	1	6.77845	58.0377	346863	26.2193	9.0133	-1.7537	0.579	0.525	1	38.7569	40.6048	82.3207	49.655	5.64885e+09	5648.85	21.695	16.0696	0.714	2.71077	-0.389672	1.07658e+11	11.032	-2.3958	24.0061	1.38032	860.1	0.08601	-1.06545	34.0928	1.53266	0.323
Ethiopie	2021	39	1	5.60963	60.4967	186329	27.1615	9.34477	-2.18383	0.397	0.44	1	42.5882	42.1929	82.6091	51.1548	4.07065e+09	4070.65	22.174	16.6981	0.787	2.6725	-0.422022	1.11262e+11	11.0463	-4.25945	24.345	1.38641	871.585	0.0871584	-1.05969	33.9658	1.53104	0.293
Ethiopie	2022	39	1	4.45279	62.9385	3465	27.9996	9.67916	-2.07061	0.355	0.47	1	41.4894	43.7806	82.8979	52.6449	4.99324e+09	4993.24	22.661	19.3781	0.765	2.6227	-0.433259	1.26773e+11	11.103	-3.66999	26.5955	1.42481	865.842	0.0865842	-1.06256	34.0293	1.53185	0.3
Gambie	2000	40	1	0.0798541	92.8157	47058	10.7655	51.0627	0.533819	0.212	0.496	1	2.04082	62.347	81.9947	71.752	7.636e+07	76.36	47.868	0.921795	0.502	2.89642	-0.377791	7.82914e+08	8.89371	-0.0322428	56.3598	1.75097	880.397	0.0880397	-1.05532	54.5455	1.73676	0.258
Gambie	2001	40	1	0.0770177	93.1971	56357	10.5813	49.914	0.679989	0.212	0.491	1	2.04082	63.0041	82.4134	72.471	8.313e+07	83.13	48.775	1.33679	0.502	2.87371	-0.204929	6.87411e+08	8.83722	-0.0275861	46.9293	1.67144	931.849	0.0931849	-1.03065	53.3597	1.72721	0.258
Gambie	2002	40	1	0.0743346	93.5632	8783	10.3916	48.788	0.82616	0.212	0.487	1	2.04082	63.6633	82.8331	73.1874	9.611e+07	96.11	49.683	1.79678	0.527	2.8502	-0.233313	5.78235e+08	8.7621	-0.0368995	59.643	1.77556	901.834	0.0901834	-1.04487	51.087	1.70831	0.259
Gambie	2003	40	1	0.0718476	93.9146	624421	10.1987	47.7243	0.32243	0.212	0.488	1	13.2075	64.3245	83.2538	73.8942	8.304e+07	83.04	50.555	2.43678	0.527	2.85169	-0.176545	4.87039e+08	8.68756	-0.0182727	68.8588	1.83796	876.481	0.0876481	-1.05726	50.0988	1.69983	0.259
Gambie	2004	40	1	0.0696569	94.253	185208	10.0097	46.6954	0.164906	0.212	0.488	1	13.2075	64.9879	83.6754	74.5723	7.616e+07	76.16	51.288	3.308	0.575	2.89265	-0.52241	9.61901e+08	8.98313	-0.0555263	49.9343	1.6984	898.56	0.089856	-1.04645	50.8893	1.70663	0.259
Gambie	2005	40	1	0.0675921	94.5788	752468	9.81609	46.5783	0.200641	0.212	0.488	1	13.2075	65.6533	84.0981	75.2483	7.299e+07	72.99	52.02	3.799	0.575	2.94241	-0.694695	1.0277e+09	9.01187	-0.0536503	50.0187	1.69913	881.663	0.0881663	-1.0547	52.0751	1.71663	0.259
Gambie	2006	40	1	0.065653	94.8929	326189	9.61801	46.4863	-0.0341241	0.212	0.477	1	13.2075	66.3208	84.5218	75.922	8.678e+07	86.78	52.751	5.23769	0.575	3.02105	-0.729944	1.05411e+09	9.02289	-0.0822081	50.3745	1.70221	929.518	0.0929518	-1.03174	48.913	1.68942	0.252
Gambie	2007	40	1	0.0638392	82.8731	906362	9.41546	46.4185	0.0474123	0.212	0.488	1	9.43396	66.9904	84.9465	76.5935	9.998e+07	99.98	53.481	6.20504	0.552	3.08346	-0.712738	1.2797e+09	9.10711	-0.0780948	44.2938	1.64634	934.913	0.0934913	-1.02923	48.913	1.68942	0.243
Gambie	2008	40	1	0.0621499	83.3594	4928665	9.20839	46.3745	0.0651513	0.212	0.488	1	9.43396	67.6621	85.3722	77.2629	9.074e+07	90.74	54.211	6.88	0.558	3.10499	-0.714707	1.56177e+09	9.19362	-0.0707924	39.0891	1.59206	941.517	0.0941517	-1.02617	54.5455	1.73676	0.243
Gambie	2009	40	1	0.0605874	83.8378	86097	8.99714	46.3535	0.122317	0.212	0.488	1	9.43396	68.3358	85.7989	77.9295	1.1392e+08	113.92	54.937	7.63	0.546	3.11365	-0.557291	1.45014e+09	9.16141	-0.0394473	41.7774	1.62094	980.541	0.0980541	-1.00853	59.585	1.77514	0.243
Gambie	2010	40	1	0.0591493	84.3037	68572	8.78153	46.3548	0.065417	0.216	0.488	1	7.54717	69.0117	86.2266	78.5938	1.2498e+08	124.98	55.662	9.2	0.546	3.10116	-0.587573	1.54329e+09	9.18845	-0.0371555	41.0125	1.61292	1036.86	0.103686	-0.984281	60.7708	1.78369	0.243
Gambie	2011	40	1	0.0578361	84.7451	291906	8.56173	46.3775	-0.000270605	0.216	0.489	1	7.54717	69.6896	86.6553	79.2555	132500000	132.5	56.384	10.8703	0.545	3.09704	-0.513805	1.40969e+09	9.14912	-0.0943421	42.6397	1.62981	1056.74	0.105674	-0.976032	60.7708	1.78369	0.243
Gambie	2012	40	1	0.0566463	85.1799	904438	8.33763	46.4212	-0.000778838	0.215	0.479	1	7.54717	70.3697	87.085	79.9149	1.4157e+08	141.57	57.105	12.4492	0.547	3.09453	-0.653232	1.415e+09	9.15076	-0.0511712	47.7007	1.67852	998.797	0.0998797	-1.00052	59.7826	1.77657	0.246
Gambie	2013	40	1	0.0555812	85.6082	523707	8.10969	46.4844	-0.0486364	0.191	0.483	1	7.54717	71.0518	87.5157	80.5712	1.1334e+08	113.34	57.82	14	0.532	3.05121	-0.706211	1.37561e+09	9.1385	-0.0731817	45.4619	1.65765	964.192	0.0964192	-1.01584	59.7826	1.77657	0.241
Gambie	2014	40	1	0.0546393	86.0298	149714	7.87805	46.566	-0.151401	0.191	0.49	1	9.43396	71.736	87.9474	81.2242	1.0048e+08	100.48	58.528	15.56	0.548	2.97433	-0.694107	1.22946e+09	9.08972	-0.035235	58.2579	1.76536	1034.74	0.103474	-0.985167	59.7826	1.77657	0.243
Gambie	2015	40	1	0.0538192	86.445	782441	7.64288	46.6647	0.0162476	0.191	0.49	1	9.43396	72.4223	88.3801	81.8738	1.2283e+08	122.83	59.228	17.6	0.552	2.88682	-0.813721	1.37818e+09	9.1393	-0.07423	44.5224	1.64858	1028.86	0.102886	-0.987644	59.7826	1.77657	0.243
Gambie	2016	40	1	0.0531187	86.8533	421919	7.40441	46.7788	-0.442044	0.191	0.492	1	9.43396	73.1106	88.8138	82.5196	1.0438e+08	104.38	59.918	19.9	0.558	2.80405	-0.850638	1.48458e+09	9.1716	-0.0711698	38.1141	1.58109	1008.47	0.100847	-0.996337	59.7826	1.77657	0.248
Gambie	2017	40	1	0.0525354	87.2551	67952	7.16266	46.9072	-0.0948309	0.819	0.766	1	10.3448	73.8011	89.2485	83.1621	3.1916e+08	319.16	60.599	22.5	0.689	2.72349	-0.657836	1.50491e+09	9.17751	-0.071	55.7336	1.74612	998.23	0.099823	-1.00077	59.7826	1.77657	0.502
Gambie	2018	40	1	0.0520669	87.6503	720479	6.91779	47.0485	-0.0874965	0.833	0.777	1	10.3448	74.4937	89.6842	83.8009	2.5065e+08	250.65	61.27	28.3	0.75	2.64138	-0.502052	1.67067e+09	9.22289	-0.08549	64.8125	1.81166	978.746	0.0978746	-1.00933	59.7826	1.77657	0.537
Gambie	2019	40	1	0.0517105	88.0389	379375	6.66989	47.2014	0.214492	0.8	0.769	1	10.3448	75.1883	90.1209	84.4362	2.0836e+08	208.36	61.931	35.6	0.753	2.58269	-0.407115	1.81361e+09	9.25854	-0.07271	55.9979	1.74817	972.668	0.0972668	-1.01204	59.7826	1.77657	0.522
Gambie	2020	40	1	0.0514638	88.4207	44507	6.41905	47.3646	0.248035	0.785	0.693	1	8.62069	75.885	90.5586	85.068	3.1991e+08	319.91	62.582	44.8133	0.789	2.56215	-0.424808	1.81217e+09	9.2582	-0.19306	47.3955	1.67574	905.346	0.0905346	-1.04319	59.7826	1.77657	0.496
Gambie	2021	40	1	0.0513238	88.7956	715796	6.16544	47.5364	0.0353308	0.74	0.727	1	8.62069	76.5838	90.9973	85.6963	2.479e+08	247.9	63.222	49.6646	0.77	2.52879	-0.380903	2.01416e+09	9.30409	-0.251823	42.098	1.62426	931.273	0.0931273	-1.03092	59.7826	1.77657	0.506
Gambie	2022	40	1	0.0512882	89.1637	393047	5.90905	47.716	0.0439733	0.774	0.763	1	8.62069	77.2847	91.437	86.3212	2.8488e+08	284.88	63.852	54.1899	0.797	2.47215	-0.275548	2.20473e+09	9.34336	-0.231488	44.7219	1.65052	918.309	0.0918309	-1.03701	59.7826	1.77657	0.624
Mauritanie	2000	41	1	5.96152	99.7622	447224	18.9185	18.153	0.345234	0.622	0.518	1	3.79747	26.2209	66.1057	41.4134	3.4972e+08	349.72	38.091	0.192031	0.471	2.79918	-0.486817	1.77952e+09	9.2503	-1.29942	58.9404	1.77041	1872.36	0.187236	-0.72761	38.566	1.5862	0.308
Mauritanie	2001	41	1	5.64227	99.7622	56452	19.3033	19.3093	0.363641	0.651	0.521	1	3.79747	27.2676	66.2681	42.328	4.6514e+08	465.14	38.616	0.261449	0.484	2.44917	-0.0786878	1.74606e+09	9.24206	-1.29936	60.7012	1.7832	1906.99	0.190699	-0.719651	38.5292	1.58579	0.312
Mauritanie	2002	41	1	5.30286	99.7622	54327	19.1177	20.576	0.382047	0.658	0.519	1	3.79747	28.5016	67.3108	43.8234	5.8078e+08	580.78	39.48	0.363229	0.484	2.14496	-0.0830336	1.77706e+09	9.2497	-1.29949	56.7855	1.75424	2004.12	0.200412	-0.698077	38.4806	1.58524	0.314
Mauritanie	2003	41	1	4.96853	99.7622	531092	18.8994	21.8519	0.0597307	0.658	0.517	1	3.7037	29.7494	68.3578	45.3283	3.4767e+08	347.67	40.351	0.424005	0.484	2.16039	-0.074342	2.05115e+09	9.312	-1.29923	55.318	1.74287	2054.25	0.205425	-0.687347	38.4806	1.58524	0.309
Mauritanie	2004	41	1	4.63932	99.7622	528137	18.6487	23.1372	-0.16634	0.701	0.506	1	3.7037	31.011	69.4091	46.8422	2.3797e+08	237.97	41.229	0.48147	0.492	2.1699	-0.365096	2.3625e+09	9.37337	-1.29974	75.2188	1.87633	2161.62	0.216162	-0.665221	38.4797	1.58523	0.318
Mauritanie	2005	41	1	4.31549	99.7594	535774	18.3654	24.431	-0.224496	0.755	0.569	1	3.7037	32.2865	70.4648	48.3637	2.2648e+08	226.48	42.111	0.669966	0.486	2.20803	-0.535384	2.93602e+09	9.46776	-1.29872	88.2351	1.94564	2206.72	0.220672	-0.656253	38.4797	1.58523	0.292
Mauritanie	2006	41	1	3.99702	99.7565	553686	18.0499	25.9997	0.24035	0.876	0.568	1	17.8947	33.5758	71.5247	49.8931	2.5218e+08	252.18	42.998	0.979661	0.528	2.26047	-0.746409	3.91958e+09	9.59324	-1.30076	82.7885	1.91797	2100.96	0.210096	-0.677581	38.4797	1.58523	0.248
Mauritanie	2007	41	1	3.68396	99.7536	58198	17.7025	27.6038	-0.279368	0.883	0.702	1	22.1053	34.879	72.5889	51.4299	2.918e+08	291.8	43.89	1.43361	0.529	2.31869	-0.576471	4.34621e+09	9.63811	-1.29669	86.0641	1.93482	2318.16	0.231816	-0.634857	38.4797	1.58523	0.451
Mauritanie	2008	41	1	3.37631	99.7507	620365	17.3233	29.2445	-0.643882	0.872	0.658	1	22.1053	36.1961	73.6575	52.9743	4.1678e+08	416.78	44.788	1.87	0.632	2.49989	-0.785068	5.20644e+09	9.71654	-1.30482	94.1202	1.97368	2781.53	0.278153	-0.555716	38.4797	1.58523	0.397
Mauritanie	2009	41	1	3.0744	99.7479	671263	16.9126	30.9206	-0.882854	0.872	0.594	1	22.1053	37.5269	74.7303	54.5237	3.4804e+08	348.04	45.686	2.28	0.632	2.7238	-0.608218	4.7146e+09	9.67344	-1.28856	82.0086	1.91386	2688.01	0.268801	-0.570569	38.47	1.58512	0.362
Mauritanie	2010	41	1	2.77806	99.745	733171	16.4706	32.6345	-1.07617	0.862	0.648	1	22.1053	38.8716	75.8075	56.0793	3.9063e+08	390.63	46.588	4	0.632	2.87305	-0.712735	5.62888e+09	9.75042	-1.32108	93.4207	1.97044	2594.66	0.259466	-0.58592	38.5282	1.58578	0.471
Mauritanie	2011	41	1	2.48737	99.7421	806545	15.9978	34.3868	-1.17368	0.862	0.648	1	22.1053	40.2302	76.8889	57.6405	3.7514e+08	375.14	47.493	4.5	0.632	3.01844	-0.641657	6.76463e+09	9.83024	-1.25605	98.4853	1.99337	2710.17	0.271017	-0.567003	38.4797	1.58523	0.471
Mauritanie	2012	41	1	2.2024	99.7392	891802	15.4944	36.1779	-1.13399	0.858	0.648	1	22.1053	41.6026	77.9747	59.2067	4.2124e+08	421.24	48.4	5	0.632	3.12479	-0.793573	6.72821e+09	9.8279	-1.3861	110.788	2.04449	2906.24	0.290624	-0.536669	38.4797	1.58523	0.472
Mauritanie	2013	41	1	1.92326	99.7364	990051	14.9609	38.0076	-1.01476	0.79	0.514	1	22.1053	42.9889	79.0648	60.7765	2.9615e+08	296.15	49.306	6.2	0.643	2.89612	-0.846974	7.22307e+09	9.85872	-1.126	102.399	2.01029	2568.12	0.256812	-0.590385	38.4797	1.58523	0.416
Mauritanie	2014	41	1	1.6502	99.7335	10404	14.3978	39.8731	-0.589508	0.799	0.519	1	25.1701	44.389	80.1591	62.3467	2.6203e+08	262.03	50.203	11.8	0.643	2.64221	-0.932971	6.59254e+09	9.81905	-0.50259	91.6104	1.96194	2994.49	0.299449	-0.523678	38.4797	1.58523	0.424
Mauritanie	2015	41	1	1.38318	99.7306	234264	13.8059	41.7743	-0.635685	0.789	0.541	1	25.1701	45.8029	81.2578	63.9165	3.7087e+08	370.87	51.089	17.6	0.643	2.64596	-0.939603	6.16686e+09	9.79006	-0.501727	77.3468	1.88844	2955.33	0.295533	-0.529393	38.4797	1.58523	0.431
Mauritanie	2016	41	1	1.15232	99.7277	35098	13.1859	43.7104	-0.748692	0.789	0.541	1	25.1701	47.2307	82.3608	65.485	3.4922e+08	349.22	51.962	24.1	0.643	2.64253	-0.76226	6.39875e+09	9.80609	-0.271135	73.1533	1.86423	2687.67	0.268767	-0.570624	38.4797	1.58523	0.431
Mauritanie	2017	41	1	0.94152	99.7248	46921	12.5384	45.6828	-0.629498	0.671	0.494	1	25.1701	48.6724	83.4681	67.0528	3.2568e+08	325.68	52.824	24.2	0.635	2.63352	-0.773205	6.80014e+09	9.83252	-0.588217	78.815	1.89661	3923.38	0.392338	-0.40634	38.4797	1.58523	0.386
Mauritanie	2018	41	1	0.737891	99.722	602507	11.8643	47.6904	-0.632383	0.701	0.47	1	20.2614	50.1278	84.5797	68.6188	4.7979e+08	479.79	53.672	35.1	0.628	2.62619	-0.812441	7.47355e+09	9.87353	-0.772244	89.1467	1.95011	4074.37	0.407437	-0.38994	38.4797	1.58523	0.391
Mauritanie	2019	41	1	0.54125	99.7191	750299	11.1641	49.7339	-0.562921	0.75	0.502	1	20.2614	51.5972	85.6956	70.1832	4.3328e+08	433.28	54.507	42.3207	0.634	2.61465	-0.866159	7.89476e+09	9.89734	0.883561	93.4867	1.97075	4149.23	0.414923	-0.382033	38.4797	1.58523	0.405
Mauritanie	2020	41	1	0.351459	99.7162	912972	10.4388	51.8125	-0.70095	0.746	0.443	1	20.2614	53.0803	86.8158	71.7451	6.8459e+08	684.59	55.327	41.0726	0.662	2.584	-0.815433	8.26075e+09	9.91702	-0.927916	86.7762	1.9384	3884.78	0.388478	-0.410634	38.4797	1.58523	0.391
Mauritanie	2021	41	1	0.16833	99.7162	89943	9.68901	53.9268	-0.555514	0.713	0.47	1	20.2614	54.5774	87.9403	73.305	4.2924e+08	429.24	56.133	43.7936	0.647	2.55391	-0.842485	9.22254e+09	9.96485	-1.06152	88.3069	1.94599	3988.53	0.398853	-0.399187	38.4797	1.58523	0.394
Mauritanie	2022	41	1	0.259894	60.5913	273242	8.9155	56.0758	-0.516949	0.726	0.472	1	20.2614	56.0882	89.0691	74.8619	3.4273e+08	342.73	56.923	44.3616	0.67	2.5916	-0.790684	9.55797e+09	9.98037	-1.40162	102.026	2.00871	3936.65	0.393665	-0.404873	38.4797	1.58523	0.396
Niger	2000	42	1	2.86332	100	743385	4.90701	6.49096	0.124968	0.797	0.76	1	1.20482	25.9918	91.2094	36.5479	3.3484e+08	334.84	16.186	0.0362613	0.622	3.42375	-0.945642	2.24175e+09	9.35059	-0.00908044	34.7128	1.54049	285.43	0.028543	-1.5445	29.2098	1.46553	0.547
Niger	2001	42	1	2.86079	100	523575	5.38324	6.90943	-0.00229338	0.797	0.761	1	1.20482	26.9318	91.0586	37.3588	4.3371e+08	433.71	16.26	0.105185	0.622	3.45653	-0.968453	2.44871e+09	9.38894	-0.0265416	33.0137	1.51869	270.002	0.0270002	-1.56863	29.9992	1.47711	0.544
Niger	2002	42	1	2.86096	100	35056	5.88142	7.30987	-0.129555	0.797	0.761	1	1.20482	27.8639	90.9066	38.1115	4.6716e+08	467.16	16.255	0.127152	0.621	3.47215	-1.02049	2.78219e+09	9.44439	-0.00414292	30.8344	1.48904	277.33	0.027733	-1.557	29.9992	1.47711	0.544
Niger	2003	42	1	2.8611	100	176865	6.40046	7.71049	0.0421949	0.797	0.761	1	1.20482	28.7882	90.7536	38.8582	6.5166e+08	651.66	16.251	0.155699	0.621	3.50446	-0.91642	3.39408e+09	9.53072	-0.0149423	33.3828	1.52352	294.453	0.0294453	-1.53098	30.3245	1.48179	0.544
Niger	2004	42	1	2.85656	100	7736	6.94041	8.11105	-0.505271	0.797	0.762	1	12.3894	29.7046	90.5994	39.5982	6.7339e+08	673.39	16.247	0.189934	0.683	3.54918	-0.88732	3.76044e+09	9.57524	-0.0132704	36.9641	1.56778	311.803	0.0311803	-1.50612	30.3718	1.48247	0.548
Niger	2005	42	1	2.85563	100	83546	7.50127	8.51225	-0.486011	0.797	0.768	1	12.3894	30.6131	90.4442	40.3309	6.3436e+08	634.36	16.242	0.221341	0.68	3.58817	-0.724551	4.38332e+09	9.6418	-0.0347287	38.3477	1.58374	283.513	0.0283513	-1.54743	33.9188	1.53044	0.574
Niger	2006	42	1	2.85467	100	662544	8.08301	8.91226	-0.227475	0.797	0.783	1	12.3894	31.5138	90.2878	41.0575	6.4021e+08	640.21	16.238	0.294034	0.68	3.61443	-0.848923	4.75636e+09	9.67727	-0.0515691	36.5314	1.56267	275.114	0.0275114	-1.56049	33.9378	1.53068	0.579
Niger	2007	42	1	2.8537	100	489532	8.68565	9.31082	-0.459753	0.797	0.783	1	12.3894	32.4066	90.1303	41.7774	5.0607e+08	506.07	16.234	0.390391	0.68	3.64121	-0.761083	5.73149e+09	9.75827	-0.121145	35.5028	1.55026	285.466	0.0285466	-1.54445	34.5638	1.53862	0.579
Niger	2008	42	1	2.85276	100	316917	9.30924	9.70763	-0.670321	0.797	0.768	1	12.3894	33.2914	89.9717	42.4901	5.6191e+08	561.91	16.229	0.7	0.686	3.67254	-0.730394	7.2976e+09	9.86318	-0.317334	39.7112	1.59891	305.838	0.0305838	-1.51451	34.5638	1.53862	0.576
Niger	2009	42	1	2.85178	100	143696	9.9537	10.1033	-1.15004	0.798	0.75	1	12.3894	34.1685	89.812	43.1966	4.4769e+08	447.69	16.225	0.76	0.613	3.70117	-0.611199	7.35213e+09	9.86641	-0.728811	49.5123	1.69471	346.995	0.0346995	-1.45968	34.5638	1.53862	0.422
Niger	2010	42	1	2.85079	100	970383	10.6191	10.4975	-1.16074	0.853	0.735	1	12.3894	35.0376	89.6512	43.8965	790000000	790	16.221	0.83	0.674	3.7307	-0.658249	7.85119e+09	9.89494	-1.00103	51.946	1.71555	413.755	0.0413755	-1.38326	34.7217	1.5406	0.266
Niger	2011	42	1	2.84984	100	79743	11.3054	10.8899	-0.878004	0.857	0.8	1	13.2743	35.8989	89.4893	44.5891	651000000	651	16.216	0.9	0.678	3.74672	-0.652858	8.77295e+09	9.94315	-1.05789	50.2464	1.7011	400.052	0.0400052	-1.39788	35.1164	1.54551	0.553
Niger	2012	42	1	2.84884	100	623905	12.0126	11.2812	-1.14813	0.871	0.805	1	13.2743	36.7523	89.3262	45.2756	9.2688e+08	926.88	16.212	1.05	0.734	3.81058	-0.647686	9.42691e+09	9.97437	-0.839044	45.086	1.65404	512.047	0.0512047	-1.29069	35.3533	1.54843	0.627
Niger	2013	42	1	2.84784	100	450283	12.7407	11.671	-1.3218	0.879	0.828	1	13.2743	37.5978	89.1621	45.9553	8.0723e+08	807.23	16.208	1.15	0.74	3.81821	-0.619116	1.02249e+10	10.0097	-0.618579	46.2951	1.66554	554.461	0.0554461	-1.25613	36.0638	1.55707	0.632
Niger	2014	42	1	2.84642	100	270237	13.4887	12.0645	-1.17584	0.879	0.823	1	13.2743	38.4355	88.9968	46.636	9.2961e+08	929.61	16.219	1.24868	0.74	3.78118	-0.695517	1.08629e+10	10.0359	-0.734306	45.7416	1.66031	506.644	0.0506644	-1.2953	36.0638	1.55707	0.629
Niger	2015	42	1	2.84455	100	83492	14.256	12.4628	-1.0597	0.878	0.805	1	13.2743	39.2652	88.8305	47.3181	994000000	994	16.247	2.47622	0.746	3.82886	-0.674529	9.68387e+09	9.98605	-0.495338	44.7274	1.65057	514.949	0.0514949	-1.28824	36.0756	1.55721	0.621
Niger	2016	42	1	2.84231	100	89146	15.0426	12.8657	-1.10076	0.878	0.804	1	14.6199	40.0871	88.663	48.0001	1.08942e+09	1089.42	16.29	4.32276	0.755	3.86709	-0.66605	1.03989e+10	10.017	-0.26112	36.4881	1.56215	462.736	0.0462735	-1.33467	36.6282	1.56382	0.579
Niger	2017	42	1	2.83968	100	693924	15.8479	13.2744	-1.25951	0.849	0.778	1	16.9591	40.9011	88.4944	48.6826	1369250000	1369.25	16.35	10.2243	0.771	3.82693	-0.687656	1.11851e+10	10.0486	-0.309622	39.0711	1.59186	433.122	0.0433122	-1.36339	36.7861	1.56568	0.549
Niger	2018	42	1	2.83673	100	49224	16.6718	13.6887	-1.35828	0.837	0.74	1	16.9591	41.7073	88.3247	49.3642	1.40222e+09	1402.22	16.425	7.27353	0.773	3.7876	-0.592983	1.28373e+10	10.1085	-0.427425	37.5388	1.57448	460.168	0.0460168	-1.33708	36.7861	1.56568	0.538
Niger	2019	42	1	2.83345	100	286232	17.5136	14.1097	-1.40501	0.849	0.767	1	16.9591	42.5056	88.1539	50.0453	1.57653e+09	1576.53	16.517	16.6119	0.764	3.76544	-0.567891	1.28896e+10	10.1102	-0.68512	37.1026	1.5694	468.485	0.0468485	-1.3293	36.7861	1.56568	0.534
Niger	2020	42	1	2.82987	100	76529	18.373	14.5381	-1.66721	0.842	0.76	1	16.9591	43.296	87.982	50.7255	2.05243e+09	2052.43	16.626	13.8406	0.745	3.7271	-0.662675	1.37447e+10	10.1381	-0.345662	35.513	1.55039	442.419	0.0442419	-1.35417	36.7861	1.56568	0.547
Niger	2021	42	1	2.82603	81.2549	864079	19.2496	14.9739	-1.53855	0.799	0.791	1	25.9036	44.0785	87.809	51.4038	1.80744e+09	1807.44	16.751	15.3108	0.74	3.70742	-0.580698	1.4915e+10	10.1736	-0.555571	37.0159	1.56839	409.757	0.0409757	-1.38747	36.7861	1.56568	0.52
Niger	2022	42	1	2.82193	81.34	648817	19.6332	15.4186	-1.46439	0.802	0.79	1	25.9036	44.8531	87.6349	52.0807	2.10657e+09	2106.57	16.894	16.937	0.785	3.71299	-0.584792	1.54339e+10	10.1885	-0.957256	31.3325	1.496	426.088	0.0426088	-1.3705	36.7861	1.56568	0.509
Ouganda	2000	43	1	14.016	95.6501	586342	34.9807	14.7117	-1.24838	0.736	0.229	1	17.7936	18.653	69.9358	26.2357	1.36119e+09	1361.19	14.786	0.163714	0.776	3.14418	-1.02819	6.19325e+09	9.79192	-0.1607	32.749	1.5152	430.945	0.0430945	-1.36558	85.4645	1.93179	0.309
Ouganda	2001	43	1	13.5502	95.9308	939322	34.8191	15.1044	-1.33291	0.718	0.231	1	24.6711	19.8542	70.349	27.5299	1.35872e+09	1358.72	15.201	0.237945	0.802	3.05907	-0.987124	5.8405e+09	9.76645	-0.151496	35.33	1.54814	426.191	0.0426191	-1.3704	85.4874	1.9319	0.282
Ouganda	2002	43	1	13.0868	96.2079	295345	34.6267	15.4967	-1.41744	0.721	0.211	1	21.2323	21.0883	70.7627	28.8504	1.14665e+09	1146.65	15.626	0.384094	0.809	3.13159	-1.02574	6.17856e+09	9.79089	-0.184648	36.2778	1.55964	423.493	0.0423493	-1.37315	85.2645	1.93077	0.27
Ouganda	2003	43	1	12.6258	96.4813	654581	34.4037	15.8883	-1.56096	0.721	0.181	1	24.6711	22.3555	71.1769	30.1967	1.37219e+09	1372.19	16.061	0.46485	0.809	3.15822	-0.948509	6.60688e+09	9.82	-0.202193	36.5857	1.56331	432.856	0.0432856	-1.36366	85.2874	1.93088	0.265
Ouganda	2004	43	1	12.1673	96.751	17036	34.1503	16.2796	-1.30477	0.721	0.235	1	23.9344	23.6558	71.5916	31.5686	1.5336e+09	1533.6	16.507	0.719971	0.809	2.99945	-0.811879	7.93949e+09	9.89979	-0.295416	35.4601	1.54974	447.659	0.0447659	-1.34905	84.7275	1.92802	0.274
Ouganda	2005	43	1	11.7118	97.0178	383596	33.8676	16.6698	-1.41722	0.721	0.429	1	23.9344	24.9891	72.0068	32.9633	1.47072e+09	1470.72	16.96	1.74221	0.809	2.93492	-0.833649	9.23922e+09	9.96564	-0.379808	38.9943	1.591	493.468	0.0493468	-1.30674	84.7446	1.92811	0.306
Ouganda	2006	43	1	11.2589	97.2814	753553	33.5549	17.0596	-1.14035	0.731	0.532	1	29.8193	26.3554	72.4225	34.3826	1.86121e+09	1861.21	17.425	2.52936	0.808	2.92746	-0.787619	9.97765e+09	9.99903	-0.644262	43.6333	1.63982	465.703	0.0465703	-1.33189	83.9618	1.92408	0.33
Ouganda	2007	43	1	10.8091	97.5417	127602	33.2132	17.4485	-0.916478	0.726	0.54	1	30.7229	27.7548	72.8386	35.8244	1.48843e+09	1488.43	17.899	3.67197	0.812	2.94107	-0.825755	1.19026e+10	10.0756	-0.792306	46.7774	1.67004	545.608	0.0545608	-1.26312	83.1334	1.91978	0.331
Ouganda	2008	43	1	10.3623	97.7986	505594	32.8426	17.8368	-0.87574	0.721	0.54	1	30.7229	29.1873	73.2553	37.2887	1.5328e+09	1532.8	18.384	3.88	0.806	2.94449	-0.840164	1.44404e+10	10.1596	-0.728861	56.2583	1.75019	557.287	0.0557287	-1.25392	83.8418	1.92346	0.332
Ouganda	2009	43	1	9.91887	98.052	88803	32.4437	18.2241	-0.991806	0.712	0.54	1	30.7229	30.6528	73.6724	38.774	1.52488e+09	1524.88	18.878	4.1	0.808	2.94129	-0.909787	2.51278e+10	10.4002	-0.81272	47.0639	1.67269	552.865	0.0552865	-1.25738	84.6418	1.92758	0.332
Ouganda	2010	43	1	9.47867	98.3016	274776	32.0166	18.6108	-1.00056	0.712	0.545	1	31.2883	32.1513	74.09	40.2803	1.83549e+09	1835.49	19.383	4.3	0.799	2.94389	-0.923494	2.66734e+10	10.4261	-0.506658	38.2692	1.58285	604.449	0.0604449	-1.21864	82.4649	1.91627	0.33
Ouganda	2011	43	1	9.04197	98.5475	666172	31.562	18.9965	-0.976102	0.704	0.549	1	34.9741	33.6829	74.508	41.8063	1.62861e+09	1628.61	19.898	4.6	0.801	2.93195	-0.936402	2.78717e+10	10.4452	-0.90614	39.7552	1.59939	614.269	0.0614269	-1.21164	82.9962	1.91906	0.33
Ouganda	2012	43	1	8.60882	98.7895	62263	31.0801	19.3815	-0.868967	0.694	0.55	1	34.9741	35.2475	74.9266	43.3515	1.72896e+09	1728.96	20.424	4.8	0.811	2.90423	-1.00158	2.73059e+10	10.4363	-1.15905	43.5021	1.63851	577.693	0.0577693	-1.2383	81.345	1.91033	0.327
Ouganda	2013	43	1	8.17961	95.6017	463629	30.5719	19.7652	-0.838691	0.678	0.544	1	34.9741	36.8451	75.3457	44.9141	1.77517e+09	1775.17	20.958	5.1	0.818	2.86955	-1.05631	2.89158e+10	10.4611	-1.05162	43.1092	1.63457	651.414	0.0651414	-1.18614	81.9718	1.91366	0.321
Ouganda	2014	43	1	7.75413	95.6831	869925	30.0372	20.1481	-0.941126	0.675	0.514	1	34.9741	38.4758	75.7652	46.4945	1.69551e+09	1695.51	21.504	5.4	0.807	2.95144	-1.09779	3.26124e+10	10.5134	-1.03155	36.0144	1.55648	728.951	0.0728951	-1.1373	82.7054	1.91753	0.316
Ouganda	2015	43	1	7.3327	95.8949	281598	29.4769	20.53	-0.804576	0.662	0.514	1	34.9741	40.1396	76.1852	48.0913	1.84672e+09	1846.72	22.06	5.8	0.775	3.07329	-1.08141	3.23872e+10	10.5104	-0.73737	37.6893	1.57622	707.743	0.0707743	-1.15012	82.6625	1.91731	0.311
Ouganda	2016	43	1	6.91559	96.1025	699042	28.8918	20.9104	-0.718276	0.636	0.507	1	33.4895	41.8364	76.6057	49.7026	1.99951e+09	1999.51	22.624	5.9	0.799	3.32192	-1.08674	2.9204e+10	10.4654	-0.625559	31.2094	1.49428	765.058	0.0765058	-1.11631	81.5067	1.91119	0.298
Ouganda	2017	43	1	6.5029	96.306	122403	28.2826	21.2895	-0.569949	0.664	0.489	1	34.2984	43.5662	77.0267	51.3277	2.24711e+09	2247.11	23.196	5.9	0.778	3.4906	-1.06944	3.07445e+10	10.4878	-0.8024	36.8371	1.56628	804.894	0.0804894	-1.09426	81.2644	1.9099	0.298
Ouganda	2018	43	1	6.09488	96.5052	552014	27.65	21.6669	-0.701696	0.637	0.493	1	34.2984	45.3291	77.4481	52.9651	2.08907e+09	2089.07	23.774	6	0.769	3.39741	-1.05123	3.2927e+10	10.5176	-1.05503	36.6384	1.56394	841.204	0.0841204	-1.0751	81.081	1.90892	0.293
Ouganda	2019	43	1	5.69143	96.7005	987717	26.9942	22.0429	-0.694264	0.637	0.487	1	34.8584	47.1251	77.8701	54.6149	2.21344e+09	2213.44	24.361	6.01782	0.758	3.39132	-1.17447	3.53482e+10	10.5484	-1.30268	39.3611	1.59507	811.628	0.0811628	-1.09064	80.7182	1.90697	0.292
Ouganda	2020	43	1	5.29283	96.8917	429917	26.3162	22.4171	-0.811039	0.634	0.459	1	34.8584	48.9541	78.2925	56.2752	3.27758e+09	3277.58	24.954	7.4	0.69	3.33342	-1.06589	3.76004e+10	10.5752	-1.19116	37.0007	1.56821	766.414	0.0766414	-1.11554	80.3531	1.905	0.295
Ouganda	2021	43	1	4.89916	97.079	878724	25.6165	22.7896	-0.937759	0.58	0.447	1	33.813	50.8161	78.7154	57.9452	2.56406e+09	2564.06	25.553	10	0.691	3.21774	-1.02854	4.05298e+10	10.6078	-1.64789	41.7136	1.62028	766.846	0.0766846	-1.11529	80.5357	1.90599	0.284
Ouganda	2022	43	1	4.51045	97.2623	334173	24.8958	23.1604	-0.711016	0.533	0.447	1	33.813	52.7111	79.1388	59.6244	2.14666e+09	2146.66	26.159	8.7	0.694	3.00759	-1.0612	4.55653e+10	10.6586	-2.95258	34.5053	1.53789	766.63	0.076663	-1.11541	80.4444	1.9055	0.278
Paraguay	2000	44	4	2.85993	96.1834	89017	0.0136838	70.7671	-0.970573	0.689	0.832	1	2.5	55.3996	93.3378	76.3912	9.597e+07	95.97	55.331	0.747631	0.627	1.9346	-1.3737	8.85571e+09	9.94722	-0.0979	78.6447	1.89567	24336	2.4336	0.386249	37.9943	1.57972	0.543
Paraguay	2001	44	4	2.65204	96.5759	545929	0.0141154	72.0502	-1.09096	0.689	0.832	1	2.5	57.6136	93.6348	77.7732	9.486e+07	94.86	55.966	1.09879	0.615	1.68776	-1.40095	8.49581e+09	9.9292	-0.0697	72.6057	1.86097	21277.1	2.12771	0.327912	38.2208	1.5823	0.543
Paraguay	2002	44	4	2.44872	96.9674	22526	0.0271688	73.306	-1.21135	0.689	0.832	1	2.5	59.7983	93.9318	79.1179	9.18e+07	91.8	56.6	1.79497	0.615	1.40951	-1.36507	7.19626e+09	9.85711	-0.0059	79.4416	1.90005	21856.1	2.18561	0.339573	38.4927	1.58538	0.543
Paraguay	2003	44	4	2.26238	97.358	999872	0.0411387	74.4673	-0.749352	0.689	0.841	1	8.75	61.9809	94.2288	80.3548	8.374e+07	83.74	56.977	2.11194	0.658	1.22989	-1.43684	7.69137e+09	9.886	-0.0249	81.1274	1.90917	22881.9	2.28819	0.359491	38.6739	1.58742	0.566
Paraguay	2004	44	4	2.08092	97.7476	801142	0.0600989	75.6031	-0.566144	0.734	0.845	1	10	64.1613	94.5187	81.5576	4.67e+07	46.7	57.305	3.45244	0.666	1.15244	-1.42646	9.62444e+09	9.98338	-0.027679	80.1044	1.90366	22449.5	2.24495	0.351207	38.9004	1.58995	0.597
Paraguay	2005	44	4	1.9018	98.1362	614436	0.0799511	76.7288	-0.652078	0.734	0.845	1	10	66.3395	94.8085	82.747	7.189e+07	71.89	57.633	7.90701	0.666	1.10596	-1.35583	1.07375e+10	10.0309	-0.0355	85.022	1.92953	21752.1	2.17521	0.337501	39.127	1.59248	0.597
Paraguay	2006	44	4	1.72506	98.5238	439968	0.100673	77.8439	-0.776525	0.734	0.845	1	10	68.5156	95.0983	83.9229	7.938e+07	79.38	57.96	7.96207	0.666	1.04173	-1.16153	1.34294e+10	10.1281	-0.1142	84.7335	1.92806	22537.4	2.25374	0.352904	39.3535	1.59498	0.597
Paraguay	2007	44	4	1.55067	98.9104	27769	0.122243	78.9487	-0.740123	0.734	0.845	1	10	70.6895	95.388	85.0853	1.338e+08	133.8	58.286	11.21	0.666	0.980402	-1.21104	1.78564e+10	10.2518	-0.2023	79.0011	1.89763	22409.1	2.24091	0.350424	39.58	1.59748	0.597
Paraguay	2008	44	4	1.3786	99.2959	127358	0.144634	80.0433	-0.72745	0.786	0.857	1	12.5	72.8612	95.6777	86.2344	1.4477e+08	144.77	58.612	14.27	0.704	0.969992	-0.979694	2.46153e+10	10.3912	-0.316797	80.7776	1.90729	22887.3	2.28873	0.359594	39.8242	1.60015	0.62
Paraguay	2009	44	4	1.20888	99.6583	989141	0.167826	81.1277	-0.883586	0.808	0.875	1	11.25	75.0307	95.9673	87.3701	1.6454e+08	164.54	58.937	18.9	0.711	1.02195	-0.788951	2.23552e+10	10.3494	-0.112179	70.842	1.85029	22454	2.2454	0.351293	40.0784	1.60291	0.634
Paraguay	2010	44	4	1.0415	89.5553	862985	0.191798	82.2018	-0.834862	0.815	0.875	1	12.5	77.1981	96.2569	88.4926	123750000	123.75	59.261	19.8	0.711	1.16986	-0.707593	2.72609e+10	10.4355	-0.570773	81.2575	1.90986	22447.1	2.24471	0.351161	40.3855	1.60622	0.641
Paraguay	2011	44	4	0.87644	89.9173	748835	0.216526	83.2658	-0.692597	0.811	0.868	1	12.5	79.3633	96.5465	89.6017	9.088e+07	90.88	59.584	24.7635	0.711	1.32708	-0.695636	3.37562e+10	10.5284	-0.618545	78.4921	1.89483	23345.7	2.33457	0.368207	40.7554	1.61019	0.631
Paraguay	2012	44	4	0.71368	90.2767	6465187	0.241984	84.3199	-0.871902	0.773	0.843	1	12.5	81.5263	96.836	90.6979	1.1822e+08	118.22	59.907	29.34	0.703	1.40686	-0.850603	3.32719e+10	10.5221	-0.868952	74.765	1.8737	23638.7	2.36387	0.373624	41.3545	1.61652	0.603
Paraguay	2013	44	4	0.553646	90.6339	559248	0.268309	85.359	-0.735862	0.714	0.827	1	17.5	83.6872	97.1255	91.7766	1.3577e+08	135.77	60.197	36.9	0.685	1.43842	-1.04813	3.85011e+10	10.5855	-0.199574	73.3699	1.86552	23514.3	2.35143	0.371331	41.6666	1.61979	0.586
Paraguay	2014	44	4	0.395797	90.9886	4836245	0.295423	86.3873	-0.0886275	0.724	0.837	1	15	85.8459	97.4149	92.8421	6.568e+07	65.68	60.474	43.0074	0.699	1.44981	-1.01108	4.03779e+10	10.6061	-0.45468	69.0837	1.83938	21944.5	2.19444	0.341325	42.1171	1.62446	0.598
Paraguay	2015	44	4	0.239925	91.3409	4182124	0.323254	87.4068	0.0352126	0.726	0.82	1	15	88.0024	97.7042	93.8963	6.789e+07	67.89	60.75	49.7163	0.704	1.46037	-1.01892	3.62114e+10	10.5588	-0.382595	66.9151	1.82552	22191.5	2.21915	0.346186	42.6331	1.62975	0.589
Paraguay	2016	44	4	0.087417	91.6908	36151	0.351776	88.4179	0.134471	0.717	0.821	1	15	90.1568	97.9936	94.9393	1.0183e+08	101.83	61.026	53.4041	0.695	1.45105	-0.76309	3.60897e+10	10.5574	-0.464226	67.7593	1.83097	24718.9	2.47189	0.393029	42.1197	1.62448	0.583
Paraguay	2017	44	4	0.163671	92.0381	2518455	0.380985	89.4203	-0.00285546	0.724	0.821	1	13.75	92.309	98.2829	95.971	1.5981e+08	159.81	61.3	61.0758	0.675	1.42258	-0.750718	3.89971e+10	10.591	-0.155348	71.0801	1.85175	23435.6	2.34356	0.369877	42.092	1.6242	0.591
Paraguay	2018	44	4	0.125544	92.3832	6674558	0.410763	90.4151	-0.0867111	0.741	0.825	1	15	94.459	98.5721	96.9921	1.7437e+08	174.37	61.585	64.9935	0.699	1.38999	-0.870757	4.02254e+10	10.6045	-0.229181	72.0692	1.85775	23139.5	2.31395	0.364353	42.3034	1.62638	0.584
Paraguay	2019	44	4	0.144608	92.7259	4.59651e+06	0.408888	91.4155	-0.0180128	0.741	0.824	1	15	96.6546	98.8688	98.0247	1.3603e+08	136.03	61.879	68.5176	0.707	1.35488	-0.893646	3.79253e+10	10.5789	-0.534126	71.2222	1.85262	19903.9	1.99039	0.298939	42.3084	1.62643	0.587
Paraguay	2020	44	4	0.135076	93.0662	5.63553e+06	0.40653	92.4079	0.0167178	0.741	0.81	1	16.25	98.8502	99	99	3.2122e+08	321.22	62.183	73.9575	0.67	1.35199	-0.857888	3.54322e+10	10.5494	-0.158624	62.7602	1.79768	18493.1	1.84931	0.26701	42.3084	1.62643	0.583
Paraguay	2021	44	4	0.139842	93.4054	5.11602e+06	0.404103	93.392	-0.000937932	0.741	0.81	1	16.25	99	99	99	1.7514e+08	175.14	62.496	77.0184	0.6885	1.21078	-1.02654	3.99509e+10	10.6015	-0.0887945	69.7423	1.8435	15782.3	1.57823	0.19817	42.3084	1.62643	0.583
Paraguay	2022	44	4	0.137459	93.7435	15266116	0.401606	94.2435	0.0355493	0.741	0.81	1	17.5	99	99	99	1.012e+08	101.2	62.818	76.2592	0.703	1.13477	-1.09058	4.19529e+10	10.6228	-0.724828	73.7379	1.86769	17137.7	1.71377	0.233952	42.3084	1.62643	0.583
Perou	2000	45	4	7.36975	94.0803	261401	1.21996	64.6899	-0.987529	0.685	0.677	1	18.3333	50.9289	91.2876	80.4077	5.3615e+08	536.15	73.042	3.07643	0.669	1.52044	-0.404046	5.17447e+10	10.7139	-0.809697	35.538	1.55069	5528.5	0.55285	-0.257392	18.1495	1.25886	0.416
Perou	2001	45	4	7.01632	94.416	849693	1.19901	65.4069	-0.97872	0.932	0.86	1	18.3333	52.4161	91.5582	81.1652	6.5715e+08	657.15	73.448	7.57876	0.764	1.34332	-0.23063	5.20302e+10	10.7163	-1.06986	35.0644	1.54487	5407.23	0.540723	-0.267025	18.2642	1.2616	0.728
Perou	2002	45	4	6.67057	94.75	442267	1.17709	66.1135	-0.96991	0.932	0.867	1	18.3333	53.9059	91.829	81.9121	7.086e+08	708.6	73.85	8.96695	0.764	1.17609	-0.306405	5.47776e+10	10.7386	-2.15584	35.2492	1.54715	5472.09	0.547209	-0.261847	18.379	1.26432	0.798
Perou	2003	45	4	6.33217	95.0824	38936	1.15421	66.8103	-1.1621	0.932	0.867	1	18.3333	55.3983	92.0999	82.6489	6.8135e+08	681.35	74.249	11.6	0.764	1.05114	-0.154855	5.8731e+10	10.7689	-1.27501	37.6246	1.57547	5345.9	0.53459	-0.271979	18.4937	1.26702	0.798
Perou	2004	45	4	6.00127	95.4132	639792	1.13041	67.4971	-1.0274	0.931	0.867	1	18.3333	56.8933	92.371	83.3752	5.9968e+08	599.68	74.644	14.1	0.764	0.974732	-0.429987	6.67687e+10	10.8246	-1.59904	41.9361	1.62259	5642.67	0.564267	-0.248516	18.6085	1.26971	0.799
Perou	2005	45	4	5.67796	95.7423	244927	1.10573	68.1735	-0.975715	0.931	0.867	1	18.3333	58.3909	92.6422	84.091	5.7822e+08	578.22	75.034	17.1	0.765	0.904184	-0.367371	7.60606e+10	10.8812	-2.57872	47.3573	1.67539	5816.9	0.58169	-0.235308	18.7444	1.27287	0.799
Perou	2006	45	4	5.36174	96.0315	853996	1.08018	68.8406	-0.841554	0.914	0.854	1	29.1667	59.8912	92.9135	84.797	5.6251e+08	562.51	75.421	20.7	0.783	0.827239	-0.221562	8.86432e+10	10.9476	-3.46653	51.7851	1.7142	5834.62	0.583462	-0.233987	18.8693	1.27576	0.793
Perou	2007	45	4	5.05289	96.246	467227	1.05381	69.4977	-0.774886	0.91	0.867	1	29.1667	61.394	93.1851	85.4926	389250000	389.25	75.803	25.2	0.78	0.769759	-0.272556	1.02171e+11	11.0093	-5.42538	55.6881	1.74576	6303.57	0.630357	-0.200413	18.9942	1.27862	0.799
Perou	2008	45	4	4.77371	96.4574	100726	1.02724	70.098	-0.892662	0.915	0.867	1	29.1667	62.8995	93.4567	86.1389	4.9445e+08	494.45	76.052	30.57	0.78	0.716987	-0.206874	1.20551e+11	11.0812	-6.18785	58.4338	1.76666	6757.03	0.675703	-0.170244	19.1199	1.28149	0.801
Perou	2009	45	4	4.50869	96.499	743796	1.00019	70.6712	-1.18005	0.912	0.863	1	29.1667	64.4076	93.7285	86.7622	4.8249e+08	482.49	76.241	31.4	0.778	0.702724	-0.33254	1.20823e+11	11.0821	-6.01994	48.1119	1.68225	6840.56	0.684056	-0.164908	19.2448	1.28431	0.802
Perou	2010	45	4	4.24683	33.0813	3885746	0.972396	71.2401	-0.999915	0.918	0.863	1	27.5	65.9183	94.0005	87.3815	-1.3637e+08	-136.37	76.43	34.77	0.788	0.756357	-0.253887	1.47528e+11	11.1689	-8.01836	51.6728	1.71326	7707.48	0.770748	-0.113088	19.3705	1.28714	0.808
Perou	2011	45	4	3.98842	33.0676	352964	0.943882	71.804	-0.76075	0.916	0.86	1	21.5385	67.4317	94.2726	87.9964	5.8972e+08	589.72	76.617	36.01	0.773	0.845382	-0.243968	1.71762e+11	11.2349	-7.33967	55.9883	1.7481	8432	0.8432	-0.0740696	19.5033	1.29011	0.812
Perou	2012	45	4	3.73313	33.0563	6837015	0.91465	72.3636	-0.907365	0.923	0.871	1	21.5385	68.9476	94.5448	88.6073	4.182e+08	418.2	76.804	38.2	0.773	0.918056	-0.40407	1.9265e+11	11.2848	-11.874	52.6199	1.72115	8629.54	0.862954	-0.0640122	19.6096	1.29247	0.824
Perou	2013	45	4	3.48123	33.045	3340178	0.884722	72.9183	-0.80574	0.908	0.88	1	21.5385	70.4662	94.8172	89.2138	3.8486e+08	384.86	76.989	39.2	0.773	0.967486	-0.460947	2.01176e+11	11.3036	-9.33368	49.7871	1.69712	8741.41	0.874141	-0.0584187	19.5058	1.29016	0.822
Perou	2014	45	4	3.23254	33.0331	986101	0.854107	73.4685	-0.550657	0.906	0.88	1	22.3077	71.9873	95.0898	89.8162	3.4665e+08	346.65	77.173	40.2447	0.784	1.04365	-0.59998	2.00786e+11	11.3027	-3.42581	46.8531	1.67074	8856.48	0.885648	-0.0527391	19.3997	1.28779	0.819
Perou	2015	45	4	2.98692	34.1018	639854	0.822812	74.0146	-0.39891	0.924	0.854	1	22.3077	73.5111	95.3625	90.4147	3.8401e+08	384.01	77.357	40.8526	0.779	1.17223	-0.603917	1.89803e+11	11.2783	-7.99961	45.1628	1.65478	9171.36	0.917136	-0.0375664	19.2936	1.28541	0.817
Perou	2016	45	4	2.74459	35.1708	2954483	0.790859	74.5559	-0.207935	0.917	0.837	1	27.6923	75.0375	95.6353	91.0089	3.7589e+08	375.89	77.539	45.4617	0.791	1.36123	-0.430348	1.91898e+11	11.2831	-5.27901	45.3888	1.65695	9602.03	0.960203	-0.017637	19.0961	1.28094	0.788
Perou	2017	45	4	2.50539	36.2404	952781	0.758255	75.0928	-0.26351	0.916	0.844	1	27.6923	76.5666	95.9083	91.599	4.169e+07	41.69	77.72	50.4504	0.798	1.50695	-0.562385	2.11008e+11	11.3243	-5.99189	47.5136	1.67682	9605.62	0.960562	-0.0174746	19.1548	1.28228	0.79
Perou	2018	45	4	2.26867	37.3104	6112638	0.724981	75.6274	-0.276881	0.924	0.872	1	27.6923	78.0982	96.1814	92.1863	482250000	482.25	77.907	55.0543	0.839	1.87582	-0.597973	2.22597e+11	11.3475	-6.66275	48.6315	1.68692	9887.75	0.988775	-0.00490257	19.2958	1.28546	0.81
Perou	2019	45	4	2.03465	38.3808	2710557	0.691055	76.1592	-0.163623	0.924	0.874	1	30	79.6325	96.4547	92.7705	5.0444e+08	504.44	78.099	59.9505	0.843	1.90973	-0.509501	2.28346e+11	11.3586	-5.27563	46.9435	1.67158	9949.63	0.994963	-0.00219298	19.1237	1.28157	0.805
Perou	2020	45	4	1.80339	39.4517	9321558	0.656487	76.6883	-0.357723	0.917	0.857	1	26.1538	81.1693	96.7282	93.3514	5.2361e+08	523.61	78.297	65.2518	0.795	1.4514	-0.524637	2.0141e+11	11.3041	1.21683	44.246	1.64587	8365.43	0.836543	-0.0775116	19.1237	1.28157	0.818
Perou	2021	45	4	1.5751	40.5225	594707	0.621299	77.2144	-0.355253	0.842	0.867	1	40	82.7088	97.0018	93.9288	3.0367e+08	303.67	78.5	71.1078	0.803	1.22566	-0.6538	2.26354e+11	11.3548	-5.17336	55.2743	1.74252	9412.29	0.941229	-0.0263047	19.1237	1.28157	0.769
Perou	2022	45	4	1.3499	41.5943	2587848	0.585506	77.7373	-0.487095	0.804	0.86	1	40	84.2509	97.2755	94.5023	8.5056e+08	850.56	78.708	74.675	0.81	0.986112	-0.808002	2.46489e+11	11.3918	-11.7887	57.2511	1.75778	9835.48	0.983548	-0.00720466	19.1237	1.28157	0.746
Togo	2000	46	1	23.0561	97.8254	680141	3.82659	8.0336	-0.29085	0.482	0.663	1	4.93827	26.8872	84.4826	45.8401	1.1009e+08	110.09	32.907	0.8	0.638	2.83726	-0.751899	2.10685e+09	9.32363	-0.0415751	48.808	1.68849	918.548	0.0918548	-1.0369	62.5115	1.79596	0.303
Togo	2001	46	1	22.3556	97.9608	988607	3.95771	8.26404	-0.116731	0.482	0.663	1	4.93827	28.3999	84.7819	47.2067	7.655e+07	76.55	33.356	0.9	0.638	2.70645	-0.830154	2.0935e+09	9.32087	-0.0708986	51.3942	1.71091	790.456	0.0790456	-1.10212	62.8792	1.79851	0.303
Togo	2002	46	1	21.6611	98.0943	302017	4.08674	8.49613	0.057387	0.474	0.664	1	4.93827	29.8886	85.0811	48.5486	8.218e+07	82.18	33.809	1	0.652	2.61092	-0.75807	2.4102e+09	9.38205	-0.0508885	51.6096	1.71273	844.633	0.0844633	-1.07333	63.2469	1.80104	0.303
Togo	2003	46	1	20.9728	98.2259	620655	4.21366	8.72967	-0.185997	0.497	0.683	1	7.40741	31.3533	85.3804	49.8657	6.884e+07	68.84	34.265	1.2	0.638	2.60631	-0.902239	2.98798e+09	9.47538	-0.0401588	55.39	1.74343	1026.27	0.102627	-0.988739	63.6146	1.80356	0.308
Togo	2004	46	1	20.2907	98.3556	94457	4.33845	8.96468	-0.314871	0.497	0.693	1	6.17284	32.7941	85.231	51.0023	81250000	81.25	34.724	1.5	0.645	2.62557	-0.943994	3.19156e+09	9.504	-0.0712503	57.8711	1.76246	983.673	0.0983673	-1.00715	63.9823	1.80606	0.308
Togo	2005	46	1	19.6154	98.4836	274002	4.46109	9.61446	-1.44022	0.633	0.753	1	7.40741	34.2109	84.6143	51.9453	9.959e+07	99.59	35.185	1.8	0.68	2.59625	-0.873771	3.22191e+09	9.50811	-0.0919003	61.4543	1.78855	934.848	0.0934848	-1.02926	64.7178	1.81102	0.329
Togo	2006	46	1	18.9465	98.6096	608818	4.58155	10.2925	-0.527322	0.727	0.767	1	8.64198	35.6037	83.9912	52.8534	93000000	93	35.649	2	0.694	2.8078	-1.04961	3.32091e+09	9.52126	-0.0918198	61.6129	1.78967	792.303	0.0792303	-1.10111	65.6371	1.81715	0.344
Togo	2007	46	1	18.2841	98.7339	949074	4.6998	10.9986	-0.341405	0.723	0.764	1	11.1111	36.9726	83.3617	53.7265	1.3066e+08	130.66	36.116	2.2	0.728	2.90744	-0.997273	3.75996e+09	9.57518	-0.0499317	60.9275	1.78481	939.687	0.0939687	-1.02702	66.0967	1.82018	0.361
Togo	2008	46	1	17.628	98.8264	294662	4.81578	11.7328	-0.168963	0.772	0.758	1	11.1111	38.3174	82.7259	54.5652	2.7609e+08	276.09	36.587	2.4	0.733	2.85178	-0.975758	4.57885e+09	9.66076	-0.0399821	61.4425	1.78847	1089.2	0.10892	-0.962891	66.8321	1.82499	0.447
Togo	2009	46	1	16.9794	98.924	646286	4.92958	12.4939	-0.165576	0.772	0.758	1	11.1111	39.6383	82.0838	55.3677	520250000	520.25	37.058	2.6	0.733	2.79141	-1.03231	4.72189e+09	9.67412	-0.0111586	61.3334	1.7877	1878.34	0.187834	-0.726225	67.1998	1.82737	0.446
Togo	2010	46	1	16.3372	99.0267	3342	5.04106	13.2825	-0.179348	0.782	0.729	1	11.1111	40.9352	81.4352	56.1361	4.1569e+08	415.69	37.533	3	0.76	2.67132	-0.967423	4.74639e+09	9.67636	-0.0486889	65.8568	1.8186	1746.39	0.174639	-0.757859	67.3837	1.82855	0.424
Togo	2011	46	1	15.6967	99.1346	36309	5.14947	14.1028	-0.162598	0.798	0.743	1	11.1111	42.2081	80.7803	56.8779	5.3474e+08	534.74	38.032	3.5	0.76	2.65496	-1.02653	5.42244e+09	9.73419	0.536859	76.6553	1.88454	1573.32	0.157332	-0.803184	67.3837	1.82855	0.423
Togo	2012	46	1	15.0607	99.2671	727207	5.25497	14.9528	-0.386458	0.797	0.743	1	11.1111	43.4571	80.119	57.5888	2.4761e+08	247.61	38.546	4	0.76	2.60284	-1.00772	5.41354e+09	9.73348	0.298795	74.6111	1.8728	1360.63	0.136063	-0.86626	70.7851	1.84994	0.425
Togo	2013	46	1	14.4325	99.3964	97775	5.35801	15.8291	-0.353711	0.778	0.745	1	15.3846	44.682	79.4514	58.2633	2.2752e+08	227.52	39.061	4.5	0.784	2.55976	-1.03498	6.02173e+09	9.77972	-0.204279	80.9906	1.90843	1350.63	0.135063	-0.869462	70.2335	1.84654	0.448
Togo	2014	46	1	13.8119	99.5222	474567	5.4585	16.7318	-0.167127	0.782	0.765	1	17.5824	45.883	78.7774	58.9023	2.1245e+08	212.45	39.579	5.7	0.791	2.531	-0.900183	6.39332e+09	9.80573	0.30495	69.9237	1.84462	1142.7	0.11427	-0.942069	70.2335	1.84654	0.481
Togo	2015	46	1	13.1988	99.6447	857643	5.55641	17.6606	-0.232123	0.807	0.752	1	17.5824	47.06	78.097	59.5059	2.3009e+08	230.09	40.1	7.12	0.796	2.50455	-0.754961	5.75546e+09	9.76008	0.0907932	68.2001	1.83378	868.264	0.0868264	-1.06135	70.2335	1.84654	0.48
Togo	2016	46	1	12.5925	99.7639	246628	5.6515	18.6163	-0.175117	0.81	0.771	1	17.5824	48.2131	77.4103	60.0753	1.9314e+08	193.14	40.628	11.31	0.795	2.48616	-0.708208	6.07117e+09	9.78327	0.303275	65.5288	1.81643	1134.57	0.113457	-0.945168	70.2335	1.84654	0.489
Togo	2017	46	1	11.9934	99.8797	641754	5.74379	19.5983	-0.874445	0.766	0.711	1	17.5824	49.3421	76.7172	60.6102	3.8572e+08	385.72	41.162	12.3602	0.782	2.46808	-0.73537	6.38742e+09	9.80533	-0.121134	57.602	1.76044	1072.43	0.107243	-0.969632	70.2335	1.84654	0.462
Togo	2018	46	1	11.4016	99.9082	43137	5.83321	20.6063	-0.885995	0.738	0.688	1	17.5824	50.4472	76.0177	61.1106	3.5913e+08	359.13	41.702	15.5	0.764	2.43899	-0.74925	7.0293e+09	9.84691	0.251178	57.3558	1.75858	1253.32	0.125332	-0.901938	70.2335	1.84654	0.453
Togo	2019	46	1	10.8173	99.9088	450895	5.91972	21.64	-0.908258	0.748	0.61	1	16.4835	51.5283	75.3119	61.5764	4.4088e+08	440.88	42.248	20.7273	0.771	2.41163	-0.746112	6.9927e+09	9.84464	-0.302855	56.1424	1.74929	1304.06	0.130406	-0.884703	70.2335	1.84654	0.412
Togo	2020	46	1	10.2405	60.4141	865139	6.00326	22.6993	-0.890698	0.762	0.691	1	18.6813	52.5854	74.5997	62.0075	5.9643e+08	596.43	42.8	29.0237	0.781	2.39122	-0.730152	7.40028e+09	9.86925	-0.0530562	55.5485	1.74467	1152.52	0.115252	-0.938352	70.2335	1.84654	0.457
Togo	2021	46	1	10.1469	61.6697	810687	6.09545	23.7836	-0.695707	0.648	0.681	1	18.6813	53.6185	73.8811	62.404	3.5079e+08	350.79	43.358	32.5051	0.765	2.36734	-0.690799	8.34224e+09	9.92128	-0.177956	57.585	1.76031	1115.7	0.11157	-0.952451	70.2335	1.84654	0.423
Togo	2022	46	1	10.0524	62.9253	771912	6.18499	24.8926	-0.788052	0.648	0.668	1	18.6813	54.6277	73.1562	62.7656	450250000	450.25	43.921	37.6212	0.765	2.33091	-0.637628	8.16948e+09	9.91219	-0.115506	65.4878	1.81616	1134.11	0.113411	-0.945344	70.2335	1.84654	0.424
Zambie	2000	47	1	19.0814	97.3175	46562	3.86912	21.0415	0.0357203	0.744	0.771	1	10.1266	26.9717	82.3107	46.2308	1.26414e+09	1264.14	34.802	0.191072	0.677	2.8105	-0.818261	3.60063e+09	9.55638	-0.1217	60.3875	1.78095	2951.37	0.295137	-0.529977	30.2641	1.48093	0.487
Zambie	2001	47	1	18.4723	97.9568	536821	4.00507	21.6787	-0.119343	0.744	0.786	1	10.1266	28.3106	82.6463	47.3292	9.162e+08	916.2	35.002	0.23313	0.687	3.02394	-0.700189	4.09444e+09	9.61219	-0.145	64.6683	1.81069	2997.71	0.299771	-0.52321	30.3407	1.48203	0.49
Zambie	2002	47	1	17.7989	99.6398	953987	4.13971	22.4138	-0.274405	0.724	0.794	1	10.1266	29.646	82.9819	48.5669	1.25398e+09	1253.98	35.475	0.477751	0.687	3.07812	-0.758519	4.19385e+09	9.62261	-0.29839	64.9165	1.81236	3006.32	0.300632	-0.521964	30.4228	1.4832	0.491
Zambie	2003	47	1	17.1319	99.6398	373726	4.27419	23.1444	0.21838	0.724	0.794	1	12.0253	30.978	83.3177	49.7947	1051000000	1051	35.951	0.980483	0.705	3.10355	-0.641859	4.90187e+09	9.69036	-0.347	62.3128	1.79458	3019.91	0.301991	-0.520006	30.8169	1.48879	0.491
Zambie	2004	47	1	16.4712	99.6207	796062	4.40843	23.87	0.190814	0.724	0.794	1	12.0253	32.3066	83.6536	51.0123	1.3661e+09	1366.1	36.43	1.1	0.705	3.17746	-0.604488	6.22111e+09	9.79387	-0.38904	70.8131	1.85011	3013	0.3013	-0.521001	30.8008	1.48856	0.491
Zambie	2005	47	1	15.8172	99.6015	221298	4.54239	24.59	0.108463	0.767	0.79	1	12.6582	33.6318	83.9896	52.2194	1.38144e+09	1381.44	36.911	1.3	0.685	3.30186	-0.59244	8.33187e+09	9.92074	-0.35694	62.2003	1.79379	3068.17	0.306817	-0.51312	30.6192	1.48599	0.495
Zambie	2006	47	1	15.1696	99.5824	64919	4.67598	25.3043	0.363792	0.766	0.789	1	14.6497	34.9535	84.3257	53.4163	1.75508e+09	1755.08	37.395	1.6	0.7	3.44489	-0.551736	1.27569e+10	10.1057	-0.61579	57.8568	1.76235	3064.47	0.306447	-0.513645	31.0039	1.49142	0.5
Zambie	2007	47	1	14.5289	99.5632	80027	4.80917	26.0121	0.363629	0.772	0.764	1	15.1899	36.2719	84.6619	54.6025	1.01744e+09	1017.44	37.881	1.9	0.703	3.52771	-0.398109	1.4057e+10	10.1479	-1.3239	65.7715	1.81804	2793.33	0.279333	-0.553877	30.9178	1.49021	0.503
Zambie	2008	47	1	13.8945	99.5441	51333	4.94184	26.7137	0.472573	0.764	0.784	1	15.1899	37.5868	84.9983	55.779	1.10395e+09	1103.95	38.371	2.2	0.699	3.56664	-0.389601	1.79109e+10	10.2531	-0.93862	59.4549	1.77419	2786.65	0.278665	-0.554918	31.0564	1.49215	0.509
Zambie	2009	47	1	13.2674	99.525	95013	5.07402	27.4076	0.569586	0.759	0.784	1	15.1899	38.8983	85.3347	56.9439	1.32929e+09	1329.29	38.861	2.5	0.694	3.53892	-0.469498	1.53283e+10	10.1855	-0.425242	56.1214	1.74913	2734.89	0.273489	-0.56306	31.7276	1.50144	0.522
Zambie	2010	47	1	12.6468	99.5058	389454	5.20556	28.0943	0.515351	0.756	0.779	1	14.0127	40.2063	85.6713	58.0991	1.00098e+09	1000.98	39.355	3	0.698	3.46192	-0.518319	2.02656e+10	10.3068	-0.6339	65.0147	1.81301	2768.13	0.276813	-0.557813	31.5258	1.49867	0.508
Zambie	2011	47	1	12.0332	99.4867	831818	5.33644	28.7731	0.509774	0.741	0.75	1	11.465	41.511	86.0079	59.2435	1.06621e+09	1066.21	39.851	3.5	0.689	3.32528	-0.410753	2.34595e+10	10.3703	-1.1099	72.7954	1.8621	2998.16	0.299816	-0.523145	31.7949	1.50236	0.503
Zambie	2012	47	1	11.4258	99.4675	276068	5.46644	29.4447	0.660963	0.731	0.766	1	11.465	42.8122	86.3447	60.3793	1.01283e+09	1012.83	40.354	4.1	0.694	3.2426	-0.291441	2.55031e+10	10.4066	-2.4334	75.3677	1.87719	3116.74	0.311674	-0.5063	32.0639	1.50602	0.504
Zambie	2013	47	1	10.8245	99.4484	722034	5.59542	30.1087	0.435933	0.689	0.727	1	11.465	44.11	86.6816	61.5069	1181250000	1181.25	40.865	4.8	0.684	3.20269	-0.315816	2.80372e+10	10.4477	-1.69033	80.4562	1.90556	3198.53	0.319853	-0.49505	31.9294	1.50419	0.484
Zambie	2014	47	1	10.2298	99.4292	170273	5.72336	30.7642	0.156212	0.67	0.724	1	10.7595	45.4044	87.0186	62.6252	1034500000	1034.5	41.382	6.5	0.696	3.1722	-0.348073	2.7141e+10	10.4336	-2.4838	76.1935	1.88192	3323.39	0.332339	-0.478419	32.0639	1.50602	0.477
Zambie	2015	47	1	9.64158	99.4101	620388	5.85007	31.4109	0.14471	0.668	0.719	1	12.6582	46.6954	87.3557	63.7349	9.0249e+08	902.49	41.907	8.8	0.697	3.12014	-0.368725	2.12512e+10	10.3274	-1.72425	79.8653	1.90236	3115.07	0.311507	-0.506533	32.0639	1.50602	0.451
Zambie	2016	47	1	9.06032	99.3909	72916	5.97553	32.0478	0.132928	0.595	0.69	1	17.9641	47.9829	87.6929	64.8351	1.09585e+09	1095.85	42.438	10.3	0.719	3.09409	-0.427309	2.09584e+10	10.3214	-0.486094	73.9586	1.86899	2846.7	0.28467	-0.545658	32.0639	1.50602	0.388
Zambie	2017	47	1	8.48599	99.3718	527699	6.0996	32.6745	0.142043	0.604	0.639	1	17.9641	49.267	88.0303	65.9259	1.15852e+09	1158.52	42.976	12.2	0.749	3.06754	-0.567572	2.58736e+10	10.4129	-1.17957	71.5857	1.85483	3202.07	0.320207	-0.494569	32.0639	1.50602	0.338
Zambie	2018	47	1	7.91874	99.3526	98481	6.22218	33.2904	0.0826331	0.63	0.653	1	17.9641	50.5478	88.3677	67.0074	1.07606e+09	1076.06	43.521	14.3	0.748	3.00602	-0.678888	2.63115e+10	10.4201	-0.363116	74.8884	1.87441	3494.54	0.349454	-0.45661	32.0639	1.50602	0.344
Zambie	2019	47	1	7.35886	99.3335	444542	6.3432	33.8947	-0.11699	0.658	0.598	1	17.9641	51.825	88.7052	68.0789	1.02982e+09	1029.82	44.072	18.7	0.754	2.96162	-0.672179	2.33087e+10	10.3675	0.148246	68.7912	1.83753	2983.88	0.298388	-0.525218	32.0639	1.50602	0.335
Zambie	2020	47	1	6.80648	99.3144	906952	6.46256	34.4868	-0.130979	0.64	0.612	1	16.7665	53.0989	89.0429	69.1404	1.07622e+09	1076.22	44.629	24.4992	0.742	2.90416	-0.731882	1.81378e+10	10.2586	-0.181167	79.2068	1.89876	3099.08	0.309908	-0.508767	32.0639	1.50602	0.329
Zambie	2021	47	1	6.74308	99.2952	78945	6.43269	35.2442	0.0524138	0.713	0.666	1	15.0602	54.4388	89.3654	70.2228	1.08764e+09	1087.64	45.192	26.9505	0.758	2.81534	-0.757705	2.20964e+10	10.3443	-0.674299	86.2085	1.93555	3418.86	0.341886	-0.466118	32.0639	1.50602	0.405
Zambie	2022	47	1	6.679	99.2761	670696	6.4025	35.9951	0.161332	0.856	0.804	1	15.0602	55.7788	89.6878	71.2959	1.86497e+09	1864.97	45.761	31.2342	0.796	2.76365	-0.504948	2.91638e+10	10.4648	-0.187643	69.2973	1.84072	3258.97	0.325897	-0.486919	32.0639	1.50602	0.522
Zimbabwe	2000	48	1	6.13829	99.2569	658566	7.33375	44.517	-1.31882	0.401	0.589	1	9.33333	54.2392	94.7705	67.9217	2.5626e+08	256.26	33.758	0.401434	0.677	1.00397	-1.12728	6689957600	9.82542	-0.110874	74.0674	1.86963	4919.52	0.491952	-0.308077	38.9298	1.59028	0.277
Zimbabwe	2001	48	1	6.1025	99.2569	579749	7.3017	44.6328	-1.41734	0.384	0.597	1	10	54.2392	94.7705	68.0887	2.5993e+08	259.93	34.17	0.799846	0.706	0.642663	-1.17281	6777384700	9.83106	-0.110839	67.8979	1.83186	4614.96	0.461496	-0.335832	39.3951	1.59544	0.266
Zimbabwe	2002	48	1	6.09567	81.5312	568146	7.63011	44.821	-1.51587	0.374	0.599	1	9.66667	54.2782	94.7224	68.2659	3.0366e+08	303.66	34.585	1.1	0.706	0.616567	-1.15676	6342116400	9.80223	-0.110908	66.8074	1.82482	4561.24	0.456124	-0.340917	39.9897	1.60195	0.266
Zimbabwe	2003	48	1	6.13425	81.8892	65641	7.99832	44.8626	-1.08758	0.374	0.599	1	10	54.3143	94.6743	68.23	2.5265e+08	252.65	34.479	1.8	0.706	0.75796	-1.18887	5727591800	9.75797	-0.110771	70.452	1.84789	4397.34	0.439734	-0.35681	40.455	1.60697	0.265
Zimbabwe	2004	48	1	6.18004	83.3649	760207	8.3727	44.8817	-1.2047	0.292	0.599	1	10	54.3473	94.6262	68.1606	2.3097e+08	230.97	34.294	2.1	0.706	0.701856	-1.25356	5805598400	9.76385	-0.111045	76.0396	1.88104	4045.23	0.404523	-0.393057	41.3597	1.61658	0.252
Zimbabwe	2005	48	1	6.226	84.3497	86415	8.74674	44.2556	-1.26764	0.294	0.614	1	16	54.3773	94.5781	68.0898	4.5191e+08	451.91	34.11	2.4	0.738	0.523851	-1.31462	5755215200	9.76006	-0.110496	76.0437	1.88106	4160.41	0.416041	-0.380864	41.6182	1.61928	0.251
Zimbabwe	2006	48	1	6.27224	85.3088	968431	9.12052	44.5686	-0.931996	0.289	0.625	1	16.6667	54.4043	94.53	68.0174	3.1956e+08	319.56	33.926	2.4	0.736	0.861223	-1.37295	5443896500	9.73591	-0.111595	82.8206	1.91814	4158.78	0.415878	-0.381034	42.1352	1.62464	0.25
Zimbabwe	2007	48	1	6.31866	86.2468	72859	9.49394	44.4121	-1.11034	0.289	0.625	1	16	54.4283	94.4819	67.9436	5.2306e+08	523.06	33.743	3	0.733	0.969119	-1.40476	5291950100	9.72362	-0.109397	84.1729	1.92517	4036.72	0.403672	-0.393971	41.8767	1.62197	0.25
Zimbabwe	2008	48	1	6.36535	87.1507	177624	9.86706	44.4904	-1.21234	0.299	0.623	1	15.2381	54.4283	94.506	67.9436	6.6872e+08	668.72	33.56	3.5	0.719	0.798207	-1.34884	4415702800	9.645	-0.113793	109.522	2.0395	3324.86	0.332486	-0.478227	42.5229	1.62862	0.249
Zimbabwe	2009	48	1	6.41222	88.0272	282536	10.2398	44.4512	-1.16718	0.313	0.61	1	15.619	54.4283	94.4939	67.9436	831500000	831.5	33.378	4	0.724	1.02627	-1.35788	9665793300	9.98524	-0.105	61.7784	1.79084	3254.28	0.325428	-0.487545	42.1352	1.62464	0.248
Zimbabwe	2010	48	1	6.45936	88.8777	38778	10.6122	44.4708	-1.10401	0.378	0.618	1	14.9533	54.4283	94.5	67.9436	7.7579e+08	775.79	33.196	6.4	0.753	1.25365	-1.37329	12041655200	10.0807	-0.122587	83.1242	1.91973	3592.67	0.359267	-0.444582	41.8767	1.62197	0.259
Zimbabwe	2011	48	1	6.50667	89.7008	493161	10.9841	44.461	-0.945329	0.376	0.62	1	14.9533	54.4283	94.4969	67.9436	7.4452e+08	744.52	33.015	8.4	0.745	1.43834	-1.42563	14101920300	10.1493	-0.3443	89.4665	1.95166	3860.79	0.386079	-0.413324	42.3937	1.6273	0.26
Zimbabwe	2012	48	1	6.55425	90.4966	598882	11.3557	44.4659	-0.778662	0.381	0.62	1	14.9533	54.4283	94.4985	67.9436	1.04107e+09	1041.07	32.834	12	0.745	1.82231	-1.3818	17114849900	10.2334	-0.34985	74.1625	1.87018	4106.95	0.410695	-0.386481	41.8767	1.62197	0.26
Zimbabwe	2013	48	1	6.60201	91.2578	704732	11.7268	44.4635	-0.66595	0.423	0.621	1	31.4815	54.4283	94.4977	67.9436	8.5148e+08	851.48	32.654	15.5	0.786	2.16327	-1.42003	19091020000	10.2808	-0.37305	58.6565	1.76832	4085.33	0.408533	-0.388773	41.8767	1.62197	0.282
Zimbabwe	2014	48	1	6.64713	91.9893	804809	12.094	44.4647	-0.71357	0.42	0.613	1	31.4815	54.4283	94.4981	67.9436	7.7804e+08	778.04	32.504	16.3647	0.794	2.19139	-1.40476	19495519600	10.2899	-0.4728	54.6716	1.73776	3940.89	0.394089	-0.404406	41.8767	1.62197	0.293
Zimbabwe	2015	48	1	6.68946	92.6948	898839	12.4568	44.4641	-0.619207	0.414	0.613	1	31.4815	54.4283	94.4979	67.9436	8.8437e+08	884.37	32.385	22.7428	0.795	2.13629	-1.33778	19963120600	10.3002	-0.3992	56.7488	1.75396	3860.92	0.386092	-0.413309	41.8767	1.62197	0.291
Zimbabwe	2016	48	1	6.72903	93.3753	986934	12.8151	44.4644	-0.62081	0.393	0.613	1	31.4815	54.4283	94.498	67.9436	744500000	744.5	32.296	23.12	0.794	2.08181	-1.28866	20548678100	10.3128	-0.343014	51.219	1.70943	3227.68	0.322768	-0.49111	41.8767	1.62197	0.289
Zimbabwe	2017	48	1	6.76577	94.0296	69002	13.1686	44.4642	-0.710431	0.418	0.616	1	32.5758	54.4283	94.4979	67.9436	8.1493e+08	814.93	32.237	24.4	0.788	2.04362	-1.29811	5.10747e+10	10.7082	-0.306253	17.2251	1.23616	3068.01	0.306801	-0.513143	41.8767	1.62197	0.291
Zimbabwe	2018	48	1	6.79952	94.6578	144768	13.5169	44.4643	-0.721012	0.471	0.61	1	31.4815	54.4283	94.498	67.9436	8.5843e+08	858.43	32.209	25	0.787	2.02054	-1.24638	3.41561e+10	10.5335	-0.717079	54.5503	1.7368	3441.99	0.344199	-0.463191	41.8767	1.62197	0.298
Zimbabwe	2019	48	1	6.8304	95.2599	214552	13.8601	44.4643	-0.943303	0.441	0.604	1	31.8519	54.4283	94.4979	67.9436	9.2271e+08	922.71	32.21	26.5883	0.789	1.98925	-1.29033	2.57174e+10	10.4102	-0.247096	55.796	1.7466	3003.66	0.300366	-0.52235	41.8767	1.62197	0.288
Zimbabwe	2020	48	1	6.85815	95.8358	277859	14.1975	44.4643	-1.05274	0.459	0.565	1	31.8519	54.4283	94.498	67.9436	1.04374e+09	1043.74	32.242	29.2986	0.811	2.03111	-1.30879	2.68679e+10	10.4292	-0.15386	47.3134	1.67498	2680.13	0.268013	-0.571844	41.8767	1.62197	0.287
Zimbabwe	2021	48	1	6.88328	96.3865	334637	14.5293	44.4643	-0.954443	0.468	0.539	1	31.8519	54.4283	94.4979	67.9436	9.8579e+08	985.79	32.303	32.4616	0.786	2.04571	-1.27715	2.72405e+10	10.4352	-0.23498	50.8471	1.70627	2635.15	0.263515	-0.579194	41.8767	1.62197	0.286
Zimbabwe	2022	48	1	6.87393	96.9052	315332	14.5165	44.4643	-0.894974	0.433	0.556	1	30.566	54.4283	94.4979	67.9436	788750000	788.75	32.395	32.5615	0.777	2.02404	-1.25997	3.27898e+10	10.5157	-0.336761	64.7636	1.81133	2657.64	0.265764	-0.575503	41.8767	1.62197	0.282
Pakistan	2000	49	5	5.2306	100	7564926	2.64889	36.382	-1.1048	0.713	0.419	1	21.5278	82.8182	96.5413	87.3443	6.9408e+08	694.08	32.982	1.94799	0.421	3.07555	-0.89491	9.94848e+10	10.9978	-0.297	21.46	1.33163	3133.73	0.313373	-0.503938	47.6053	1.67766	0.205
Pakistan	2001	49	5	5.03399	100	7127414	2.65048	36.4705	-1.37124	0.713	0.415	1	21.5643	83.1168	96.5866	87.5861	2.67056e+09	2670.56	33.18	1.31855	0.421	3.09208	-0.880222	9.71456e+10	10.9874	-0.352	23.5772	1.37249	3109.89	0.310989	-0.507255	47.9608	1.68089	0.203
Pakistan	2002	49	5	4.8383	100	6689463	2.65421	36.5598	-1.63768	0.738	0.478	1	21.4912	83.412	96.632	87.8248	2.85282e+09	2852.82	33.38	2.57743	0.467	2.50886	-0.955986	9.79233e+10	10.9909	-0.795	23.129	1.36416	3148.97	0.314897	-0.501832	47.8466	1.67985	0.236
Pakistan	2003	49	5	4.64367	100	6251616	2.65788	36.6491	-1.54905	0.746	0.616	1	21.6374	83.7072	96.6773	88.0625	1.32478e+09	1324.78	33.58	5.04116	0.574	2.18939	-0.804457	1.12372e+11	11.0507	-0.515	24.6502	1.39182	3355.33	0.335533	-0.474264	47.7921	1.67936	0.356
Pakistan	2004	49	5	4.45004	100	58136	2.66146	38.3533	-1.58288	0.746	0.616	1	21.345	84.0023	96.7227	88.2994	1.61851e+09	1618.51	33.781	6.16432	0.588	2.23515	-1.17881	1.32216e+11	11.1213	-1.062	24.8083	1.3946	3651.14	0.365114	-0.437572	46.7582	1.66986	0.356
Pakistan	2005	49	5	4.25747	100	537566	3.21438	40.0519	-1.75139	0.746	0.627	1	21.345	84.2974	95.1514	87.9858	1.77165e+09	1771.65	33.982	6.33233	0.588	2.15849	-1.06205	1.45209e+11	11.162	-2.156	29.8785	1.47536	3707.5	0.37075	-0.430919	46.6545	1.66889	0.361
Pakistan	2006	49	5	4.06591	100	4937534	3.29627	41.8712	-2.02468	0.742	0.622	1	21.345	84.5925	94.9767	88.1423	2.41569e+09	2415.69	34.184	6.5	0.589	2.09851	-0.818344	1.61871e+11	11.2092	-4.164	33.0497	1.51917	3826.2	0.38262	-0.417232	46.875	1.67094	0.357
Pakistan	2007	49	5	3.87537	100	449923	3.36282	43.6966	-2.43271	0.738	0.588	1	21.0526	84.8876	94.849	88.313	1.23529e+09	1235.29	34.387	6.8	0.59	2.14152	-0.818873	1.84141e+11	11.2652	-5.492	30.7879	1.48838	3981.93	0.398193	-0.399907	46.7167	1.66947	0.352
Pakistan	2008	49	5	3.6859	100	4061007	3.43007	45.5276	-2.57301	0.766	0.661	1	22.4852	85.1827	94.7212	88.482	1.12036e+09	1120.36	34.59	7	0.588	2.17889	-0.899149	2.02204e+11	11.3058	-5.389	34.349	1.53591	3915.4	0.39154	-0.407224	45.8087	1.66095	0.419
Pakistan	2009	49	5	3.49751	100	362287	3.49802	47.3642	-2.64453	0.802	0.722	1	21.7689	85.4777	94.5931	88.6492	1.5542e+09	1554.2	34.793	7.5	0.607	2.22916	-1.07563	1.87338e+11	11.2726	-2.267	33.3269	1.52279	3879.56	0.387956	-0.411218	45.762	1.6605	0.451
Pakistan	2010	49	5	3.31014	53.2944	318459	3.56665	49.2066	-2.67593	0.836	0.748	1	22.2222	85.7727	94.465	88.8147	3.19972e+09	3199.72	34.997	8	0.616	2.25258	-1.08961	1.9671e+11	11.2938	-1.975	31.989	1.505	3809.43	0.380943	-0.41914	45.7166	1.66007	0.469
Pakistan	2011	49	5	3.12381	53.0734	2746153	3.63597	51.0548	-2.81004	0.835	0.748	1	22.5146	86.0677	94.3366	88.9785	3.75668e+09	3756.68	35.202	8	0.612	2.11083	-1.08339	2.30587e+11	11.3628	-1.264	32.3626	1.51004	3727.35	0.372735	-0.428599	46.6168	1.66854	0.469
Pakistan	2012	49	5	2.93853	52.7821	2307506	3.70599	52.9086	-2.677	0.841	0.732	1	22.5146	86.3626	94.2081	89.1406	2.08931e+09	2089.31	35.408	8.1	0.629	1.79798	-1.06879	2.50107e+11	11.3981	-0.782	31.319	1.49581	3401.66	0.340166	-0.468309	46.7816	1.67008	0.467
Pakistan	2013	49	5	2.75437	52.497	186924	3.77673	54.7673	-2.6033	0.823	0.759	1	20.743	86.6576	94.0795	89.3007	2.27674e+09	2276.74	35.613	9	0.619	1.5369	-0.962786	2.58657e+11	11.4127	-1.121	30.8903	1.48982	3661.01	0.366101	-0.436399	47.0631	1.67268	0.474
Pakistan	2014	49	5	2.57127	52.2114	1430726	3.84817	56.6315	-2.40128	0.808	0.782	1	20.743	86.9525	93.9506	89.4591	3.71996e+09	3719.96	35.819	10	0.606	1.40918	-0.839295	2.7139e+11	11.4336	-1.765	29.4698	1.46938	3725.95	0.372595	-0.428763	47.0268	1.67235	0.477
Pakistan	2015	49	5	2.38922	52.6326	992084	3.92032	58.501	-2.47188	0.746	0.745	1	20.5882	87.2474	93.8216	89.6158	4.22115e+09	4221.15	36.026	11	0.605	1.29655	-0.834523	2.99964e+11	11.4771	-1.648	26.6882	1.42632	3867.19	0.386719	-0.412604	46.9619	1.67175	0.446
Pakistan	2016	49	5	2.20824	53.0705	553293	3.99318	60.3757	-2.47387	0.701	0.74	1	20.5882	87.5422	93.6925	89.7707	3.35506e+09	3355.06	36.234	12.3854	0.601	1.20406	-0.900909	3.1363e+11	11.4964	-2.524	24.7016	1.39272	4163.39	0.416339	-0.380553	47.7299	1.67879	0.432
Pakistan	2017	49	5	2.02836	53.5246	114627	4.06676	62.2553	-2.39691	0.669	0.731	1	20.5882	87.8371	93.5632	89.9238	2.67749e+09	2677.49	36.442	13.78	0.593	1.32814	-0.802612	3.39206e+11	11.5305	-2.444	25.472	1.40606	4348.83	0.434883	-0.361628	48.001	1.68125	0.426
Pakistan	2018	49	5	1.8492	53.9867	967188	4.14101	64.1435	-2.25401	0.632	0.687	1	20.2346	88.1319	93.4337	90.0758	1.51745e+09	1517.45	36.666	15.34	0.603	1.53717	-0.801857	3.56128e+11	11.5516	-1.758	27.6261	1.44132	4419.17	0.441917	-0.354659	47.9361	1.68066	0.402
Pakistan	2019	49	5	1.67086	54.4588	9224832	4.216	66.0398	-2.25174	0.576	0.668	1	20.2346	88.4267	93.3041	90.2268	2.22194e+09	2221.94	36.907	17.0709	0.601	1.60798	-0.879992	3.20909e+11	11.5064	-2.319	28.9056	1.46098	4400.12	0.440012	-0.356536	47.1189	1.67319	0.379
Pakistan	2020	49	5	1.49348	54.9517	8773646	4.29182	67.9434	-1.79269	0.608	0.636	1	20.1754	88.7214	93.1743	90.3763	2.75565e+09	2755.65	37.165	18.9348	0.587	1.73303	-0.857438	3.00426e+11	11.4777	-2.102	26.7163	1.42678	4301.19	0.430119	-0.366411	47.6378	1.67795	0.387
Pakistan	2021	49	5	1.31719	55.476	831809	4.36853	69.8533	-1.71374	0.637	0.672	1	20.1754	89.0162	93.0444	90.5243	2.92281e+09	2922.81	37.44	24.9775	0.604	1.83406	-0.810482	3.48517e+11	11.5422	-1.905	27.0304	1.43185	4683.57	0.468357	-0.329423	47.3783	1.67558	0.402
Pakistan	2022	49	5	1.14215	56.0264	7858663	4.44623	71.7687	-1.83983	0.638	0.678	1	20.4678	89.3109	92.9142	90.6705	1.87155e+09	1871.55	37.731	32.9486	0.564	1.89325	-0.80435	3.7489e+11	11.5739	-0.305	33.0314	1.51893	4242.75	0.424275	-0.372352	47.508	1.67677	0.393
Afghanistan	2000	50	5	25.4022	30.7411	856777	3.2992	22.2983	-2.43897	0.038	0.038	1	27.3092	21.9773	57.0968	29.731	2.3336e+08	233.36	22.078	0.00464199	0.052	1.4438	-1.27172	3.52142e+09	9.54672	-0.0505776	48.2772	1.68374	302.595	0.0302595	-1.51914	57.883	1.76255	0.072
Afghanistan	2001	50	5	25.3831	30.7735	843445	3.29988	22.3095	-2.237	0.082	0.081	1	27.3092	21.9773	57.0968	29.7629	7.3749e+08	737.49	22.169	0.00472257	0.069	0.742517	-1.29766	2.81357e+09	9.44926	-0.0506085	48.2772	1.68374	236.892	0.0236892	-1.62545	57.883	1.76255	0.083
Afghanistan	2002	50	5	24.4576	33.282	260395	3.60718	23.7347	-2.03503	0.618	0.642	1	27.3092	24.0908	58.8837	31.8361	1.93222e+09	1932.22	22.261	0.0045614	0.3	6.44932	-1.25114	3.8257e+09	9.58271	-0.0505467	48.2772	1.68374	210.862	0.0210862	-1.676	57.883	1.76255	0.225
Afghanistan	2003	50	5	23.5331	35.7897	67728	3.91407	25.1601	-2.19837	0.673	0.642	1	27.3092	26.2044	60.6705	33.9086	2119750000	2119.75	22.353	0.0878913	0.323	7.54102	-1.34418	4.52095e+09	9.65523	-0.0506703	48.2772	1.68374	229.968	0.0229968	-1.63833	58.1237	1.76435	0.23
Afghanistan	2004	50	5	22.5989	38.315	86002	4.22062	26.5927	-2.29568	0.667	0.652	1	27.3092	28.318	62.4573	35.9994	2.88278e+09	2882.78	22.5	0.105809	0.323	3.93318	-1.35065	5.2249e+09	9.71808	-0.0504231	48.2771	1.68374	204.231	0.0204231	-1.68988	58.1252	1.76436	0.24
Afghanistan	2005	50	5	21.656	40.8577	48635	4.52645	28.0329	-2.06751	0.684	0.648	1	27.3092	30.4316	64.2442	38.1081	3.55813e+09	3558.13	22.703	1.22415	0.351	3.57651	-1.44725	6.20326e+09	9.79262	-0.0509174	48.2772	1.68374	252.069	0.0252069	-1.59848	58.1237	1.76435	0.339
Afghanistan	2006	50	5	20.715	43.3985	886433	4.8314	29.4737	-2.21913	0.687	0.648	1	27.3092	32.5452	66.031	40.2158	3.53694e+09	3536.94	22.907	2.10712	0.496	4.13968	-1.44629	6.97176e+09	9.84334	-0.0499289	48.2771	1.68374	304.421	0.0304421	-1.51653	58.1237	1.76435	0.402
Afghanistan	2007	50	5	19.776	45.9379	286083	4.85422	30.8753	-2.41337	0.685	0.648	1	27.686	34.7739	67.8962	42.4295	5.14046e+09	5140.46	23.113	1.9	0.496	1.7932	-1.61325	9.74789e+09	9.98891	-0.051906	48.2774	1.68374	354.28	0.035428	-1.45065	58.1237	1.76435	0.402
Afghanistan	2008	50	5	18.8391	48.4754	685455	4.84283	32.2737	-2.69136	0.716	0.652	1	27.686	37.0168	69.7656	44.6538	5.12445e+09	5124.45	23.32	1.84	0.494	2.00233	-1.6721	1.01093e+10	10.0047	-0.0479518	48.2768	1.68374	607.833	0.0607833	-1.21622	58.1237	1.76435	0.408
Afghanistan	2009	50	5	17.9043	51.0111	8455	4.79737	33.6691	-2.71142	0.718	0.65	1	27.686	39.2736	71.6391	46.8886	6.5686e+09	6568.6	23.528	3.55	0.497	3.56129	-1.5523	1.24162e+10	10.094	-0.0558601	48.2779	1.68375	975.048	0.0975048	-1.01097	58.1237	1.76435	0.397
Afghanistan	2010	50	5	16.9717	53.545	483366	4.71801	35.0617	-2.57915	0.723	0.629	1	27.686	41.5446	73.5167	49.1338	6.88254e+09	6882.54	23.737	4	0.516	2.8949	-1.64539	1.58567e+10	10.2002	-0.192022	48.2756	1.68373	1182.89	0.118289	-0.927055	58.1252	1.76436	0.378
Afghanistan	2011	50	5	16.041	56.0772	881748	4.60488	36.4517	-2.50206	0.723	0.632	1	27.7108	43.8295	75.3985	51.3897	7.09915e+09	7099.15	23.948	5	0.516	3.68951	-1.60047	1.78051e+10	10.2505	-0.0510363	48.2802	1.68377	1436.11	0.143611	-0.842811	58.1237	1.76435	0.383
Afghanistan	2012	50	5	15.1125	58.6076	279846	4.45814	37.8394	-2.41856	0.722	0.635	1	27.7108	46.1286	77.2843	53.6558	6.96673e+09	6966.73	24.16	5.45455	0.516	4.07763	-1.43037	1.99073e+10	10.299	-0.0656845	48.271	1.68369	1324.12	0.132412	-0.878072	58.1237	1.76435	0.384
Afghanistan	2013	50	5	14.1863	61.1361	677664	4.27794	39.2248	-2.51935	0.712	0.625	1	27.7108	48.4417	79.1743	55.9321	5.35404e+09	5354.04	24.373	5.9	0.538	3.46679	-1.44596	2.01464e+10	10.3042	-0.047774	48.2894	1.68385	1060.79	0.106079	-0.97437	58.1237	1.76435	0.383
Afghanistan	2014	50	5	13.2622	63.6626	75191	4.06446	40.6081	-2.41107	0.697	0.625	1	27.7108	50.7688	81.0685	58.2186	5.17598e+09	5175.98	24.587	7	0.538	3.65758	-1.36493	2.04971e+10	10.3117	-0.0429944	48.2527	1.68352	868.576	0.0868576	-1.06119	58.1237	1.76435	0.381
Afghanistan	2015	50	5	12.3402	66.1875	472284	3.81783	41.9898	-2.56263	0.693	0.611	1	27.7108	53.11	82.9667	60.5153	4.81514e+09	4815.14	24.803	8.26	0.533	3.12134	-1.35471	1.91342e+10	10.2818	-0.166984	48.3261	1.68418	970.08	0.097008	-1.01319	58.1237	1.76435	0.375
Afghanistan	2016	50	5	11.4205	68.7104	86909	3.53822	43.3699	-2.66216	0.651	0.597	1	27.7108	55.4652	84.8692	62.8221	4.61085e+09	4610.85	25.02	11	0.514	2.58155	-1.54023	1.81166e+10	10.2581	-0.0795853	48.1792	1.68286	862.791	0.0862791	-1.06409	58.1237	1.76435	0.352
Afghanistan	2017	50	5	10.5017	71.2346	263792	3.22568	44.7508	-2.79498	0.687	0.584	1	27.7108	57.8345	86.7757	65.1421	4.24882e+09	4248.82	25.25	13.5	0.542	2.86649	-1.53007	1.87535e+10	10.2731	-0.0402732	48.4731	1.6855	829.312	0.0829312	-1.08128	58.1237	1.76435	0.357
Afghanistan	2018	50	5	9.58358	73.7604	65607	2.88041	46.1335	-2.75344	0.691	0.58	1	27.7108	60.2178	88.6863	67.4759	4.07377e+09	4073.77	25.495	16.8	0.554	2.88521	-1.50288	1.80532e+10	10.2566	-0.0806314	47.8854	1.6802	924.251	0.0924251	-1.03421	58.277	1.7655	0.354
Afghanistan	2019	50	5	8.66667	76.2873	46062	2.50262	47.5184	-2.65254	0.685	0.605	1	27.8689	62.6152	90.6011	69.8227	4.50945e+09	4509.45	25.754	17.6	0.544	2.90853	-1.41931	1.87994e+10	10.2741	0.00291649	49.0608	1.69073	802.613	0.0802613	-1.09549	58.277	1.7655	0.356
Afghanistan	2020	50	5	7.75127	78.8148	433906	2.09257	48.9057	-2.70272	0.707	0.566	1	27.0161	65.0266	92.5201	72.1821	4.48043e+09	4480.43	26.026	18.4	0.559	3.13475	-1.49336	1.99559e+10	10.3001	0.0242583	46.7099	1.66941	702.888	0.0702888	-1.15311	58.8075	1.76943	0.361
Afghanistan	2021	50	5	6.9596	81.3436	696816	1.65051	50.2966	-2.51868	0.146	0.096	1	27.0161	67.4521	94.4431	74.5545	4.69052e+09	4690.52	26.314	18	0.065	2.85136	-1.15227	1.426e+10	10.1541	0.0135874	51.4117	1.71106	676.696	0.0676696	-1.16961	58.5422	1.76747	0.157
Afghanistan	2022	50	5	6.1758	83.3468	477442	1.17139	51.6914	-2.54496	0.071	0.035	1	27.0161	69.8916	96.3703	76.9392	3.95965e+09	3959.65	26.616	18.2	0.035	2.5345	-1.18368	1.44972e+10	10.1613	0.0189229	72.8855	1.86264	689.792	0.0689792	-1.16128	58.6749	1.76845	0.079
Sri Lanka	2000	51	5	4.12911	93.7531	275292	1.7484	76.8073	-1.90411	0.646	0.723	1	4.61111	80.9275	95.8761	83.6751	259250000	259.25	18.38	0.64741	0.603	0.565925	-0.199229	1.63308e+10	10.213	-0.172941	45.6598	1.65953	2851.81	0.285181	-0.54488	37.4741	1.57373	0.495
Sri Lanka	2001	51	5	4.03264	94.1769	807	1.75465	77.604	-1.34087	0.646	0.713	1	4.55556	81.2278	95.8894	83.9204	3.4342e+08	343.42	18.365	0.793822	0.606	0.763488	-0.244307	1.57498e+10	10.1973	-0.17179	39.7305	1.59912	2750.12	0.275012	-0.560649	37.49	1.57392	0.502
Sri Lanka	2002	51	5	3.9362	94.5914	88614	1.75679	78.4039	-0.777629	0.685	0.727	1	4.66667	81.5533	95.9673	84.1981	3.4621e+08	346.21	18.349	1.05042	0.606	1.00147	-0.216593	1.65365e+10	10.2184	-0.18505	36.1086	1.55761	2799.96	0.279996	-0.552849	37.5698	1.57484	0.533
Sri Lanka	2003	51	5	3.83973	94.9967	691413	1.75899	79.207	-0.833158	0.685	0.727	1	4.44444	81.879	96.0453	84.4762	6.6391e+08	663.91	18.334	1.45858	0.606	1.00211	-0.27202	1.88818e+10	10.276	-0.20141	36.2312	1.55908	2852.47	0.285247	-0.544779	37.793	1.57741	0.533
Sri Lanka	2004	51	5	3.74327	95.3926	496615	1.76123	80.0132	-1.01044	0.685	0.717	1	4.88889	82.2049	96.1233	84.7546	464750000	464.75	18.319	1.44616	0.609	0.965378	-0.167388	2.06625e+10	10.3152	-0.22701	33.244	1.52171	2745.29	0.274529	-0.561412	36.8362	1.56628	0.52
Sri Lanka	2005	51	5	3.64683	95.7793	30185	1.76353	80.8225	-1.15224	0.509	0.649	1	4.88889	82.531	96.2013	85.033	1.20739e+09	1207.39	18.303	1.79205	0.609	0.936753	-0.339862	2.44058e+10	10.3875	-0.234	35.0709	1.54495	3140.53	0.314053	-0.502997	40.0255	1.60234	0.438
Sri Lanka	2006	51	5	3.55038	96.1569	106915	1.76588	81.6351	-1.42155	0.423	0.616	1	4.88889	82.8572	96.2793	85.3118	7.833e+08	783.3	18.288	2.53757	0.606	0.995543	-0.194801	2.82798e+10	10.4515	-0.4504	36.3959	1.56105	3338.28	0.333828	-0.476477	38.9093	1.59005	0.382
Sri Lanka	2007	51	5	3.45395	96.5256	912008	1.76828	82.4507	-1.75128	0.399	0.628	1	5.77778	83.1837	96.3573	85.5908	4.6756e+08	467.56	18.272	3.88	0.61	1.04107	-0.146114	3.23502e+10	10.5099	-0.548	37.5809	1.57497	3358.8	0.33588	-0.473816	38.1119	1.58106	0.378
Sri Lanka	2008	51	5	3.35749	96.8853	716935	1.77072	83.2695	-1.7986	0.382	0.622	1	5.77778	83.5103	96.4354	85.87	5.5829e+08	558.29	18.257	3.20879	0.609	1.02561	-0.218608	4.07138e+10	10.6097	-0.6905	34.4375	1.53703	3134.03	0.313403	-0.503897	41.381	1.6168	0.37
Sri Lanka	2009	51	5	3.26104	97.2361	521796	1.77322	84.0915	-1.3409	0.373	0.619	1	5.77778	83.8371	96.5134	86.1495	4.8946e+08	489.46	18.242	3.54439	0.605	0.965635	-0.396393	4.20662e+10	10.6239	-0.384	31.4942	1.49823	3147.07	0.314707	-0.502093	41.6202	1.6193	0.367
Sri Lanka	2010	51	5	3.16462	98.7012	326684	1.77577	84.9167	-0.942947	0.478	0.613	1	5.33333	84.1641	96.5915	86.4292	5.5526e+08	555.26	18.226	3.37659	0.642	0.904382	-0.419683	5.86362e+10	10.7682	-0.435059	34.4305	1.53694	3368.2	0.33682	-0.472602	41.7796	1.62096	0.393
Sri Lanka	2011	51	5	3.06818	98.7012	131414	1.77837	85.7449	-0.724771	0.479	0.602	1	5.77778	84.4913	96.6696	86.7091	5.6446e+08	564.46	18.211	3.46049	0.642	0.920757	-0.399363	6.77533e+10	10.8309	-0.89592	34.4756	1.53751	3623.2	0.36232	-0.440908	43.5337	1.63883	0.391
Sri Lanka	2012	51	5	2.97173	98.7012	936071	1.78101	86.5764	-0.717079	0.484	0.601	1	5.77778	84.8187	96.7478	86.9893	4.5006e+08	450.06	18.196	3.41854	0.652	0.75175	-0.241881	7.04472e+10	10.8479	-0.877191	33.0594	1.5193	3708.99	0.370899	-0.430744	43.6932	1.64041	0.396
Sri Lanka	2013	51	5	2.87477	98.7012	739296	1.78354	87.4109	-0.612895	0.557	0.642	1	5.77778	85.1463	96.8259	87.2717	4.0062e+08	400.62	18.198	3.43952	0.669	0.54383	-0.220972	7.70006e+10	10.8865	-0.867478	38.3993	1.58432	3748.58	0.374858	-0.426133	43.6932	1.64041	0.424
Sri Lanka	2014	51	5	2.77724	98.7012	541119	1.7859	88.2487	-0.330464	0.552	0.642	1	5.77778	85.474	96.904	87.5564	4.9178e+08	491.78	18.218	10.5	0.672	0.50837	-0.345357	8.25285e+10	10.9166	-0.826806	53.0951	1.72505	4007.71	0.400771	-0.397103	43.6932	1.64041	0.419
Sri Lanka	2015	51	5	2.67915	98.7831	341664	1.78805	89.0898	0.0831827	0.701	0.792	1	4.88889	85.802	96.9822	87.843	503250000	503.25	18.256	15.26	0.721	0.456782	-0.376923	8.5141e+10	10.9301	-0.626668	53.1451	1.72546	4476.93	0.447693	-0.34902	44.27	1.64611	0.554
Sri Lanka	2016	51	5	2.58053	98.865	141116	1.78996	89.9342	-0.0113401	0.817	0.793	1	5.77778	86.1301	97.0604	88.1316	4.2692e+08	426.92	18.311	22.19	0.736	0.415307	-0.33621	8.80123e+10	10.9445	-0.660241	50.5306	1.70355	4878.14	0.487814	-0.311746	44.4315	1.64769	0.598
Sri Lanka	2017	51	5	2.49372	98.9468	9271417	1.79159	90.7819	-0.075448	0.795	0.814	1	5.77778	86.4584	97.1386	88.4219	3.5052e+08	350.52	18.384	25.1	0.739	0.378825	-0.489905	9.43762e+10	10.9749	-1.30093	57.1435	1.75697	4726.28	0.472628	-0.32548	44.5963	1.6493	0.59
Sri Lanka	2018	51	5	2.41319	99.0288	7052894	1.79286	91.6332	-0.139305	0.826	0.841	1	5.77778	86.7869	97.2169	88.714	-2.6763e+08	-267.63	18.476	28.3	0.742	0.755905	-0.352847	9.44939e+10	10.9754	-1.54619	49.6602	1.69601	4876.87	0.487687	-0.311859	45.4481	1.65752	0.615
Sri Lanka	2019	51	5	2.33235	99.1106	4824586	1.79379	92.4879	-0.215537	0.699	0.802	1	5.33333	87.1156	97.2951	89.0075	2.0766e+08	207.66	18.585	32	0.764	0.611876	-0.303989	8.9015e+10	10.9495	-0.666103	50.0658	1.69954	4973.6	0.49736	-0.303329	45.4473	1.65751	0.565
Sri Lanka	2020	51	5	2.25119	99.1925	2585816	1.79428	93.3463	-0.0891289	0.657	0.755	1	5.38117	87.4445	97.3734	89.3025	2.2621e+08	226.21	18.713	36.1847	0.722	0.530627	-0.330327	8.43043e+10	10.9258	-0.419533	49.521	1.69479	4853.11	0.485311	-0.31398	45.4575	1.65761	0.574
Sri Lanka	2021	51	5	2.16976	99.2744	337276	1.79429	94.2083	-0.376773	0.677	0.747	1	5.38117	87.7735	97.4516	89.5988	1.5411e+08	154.11	18.86	44.4531	0.764	1.07545	-0.356694	8.86093e+10	10.9475	-0.574849	44.1591	1.64502	4884.53	0.488453	-0.311177	45.4524	1.65756	0.577
Sri Lanka	2022	51	5	2.08813	99.3563	8079686	1.79379	94.9481	-0.804307	0.707	0.77	1	5.33333	88.1028	97.5299	89.8964	1.857e+07	18.57	19.026	50.1067	0.712	0.112773	-0.383233	7.41449e+10	10.8701	-0.869017	45.2336	1.65546	4347.64	0.434764	-0.361747	45.4549	1.65758	0.604
Nepal	2000	52	5	3.38997	83.7735	971521	0.968719	14.8949	-1.16383	0.77	0.73	1	5.85366	77.6937	91.0902	79.4884	4.4514e+08	445.14	13.397	0.204652	0.544	1.70978	-0.5673	5.49425e+09	9.73991	0.000484827	55.7106	1.74594	599.056	0.0599056	-1.22253	29.6414	1.4719	0.363
Nepal	2001	52	5	3.27289	84.29	299558	1.10227	17.396	-1.44064	0.76	0.708	1	5.85366	78.3882	91.1431	80.1671	5.3868e+08	538.68	13.947	0.240015	0.55	1.60184	-0.526202	6.00706e+09	9.77866	-0.00441277	55.7999	1.74663	622.079	0.0622079	-1.20615	29.7105	1.47291	0.355
Nepal	2002	52	5	3.16222	84.8143	663071	1.23829	19.8888	-1.71746	0.688	0.628	1	5.85366	79.0814	91.1959	80.8065	4.8671e+08	486.71	14.24	0.312956	0.524	1.49583	-0.463561	6.05088e+09	9.78182	0.00595254	46.2307	1.66493	645.291	0.0645291	-1.19024	29.5849	1.47107	0.274
Nepal	2003	52	5	3.05199	85.3324	30352	1.37639	22.4289	-1.89185	0.676	0.628	1	5.85366	79.7734	91.2486	81.4417	6.0597e+08	605.97	14.538	0.382811	0.524	1.37503	-0.588843	6.33047e+09	9.80144	-0.0147781	44.2479	1.64589	669.501	0.0669501	-1.17425	29.4873	1.46963	0.226
Nepal	2004	52	5	2.94222	85.8434	401516	1.51655	25.016	-2.14914	0.68	0.628	1	5.85366	80.4642	91.3011	82.0725	5.2391e+08	523.91	14.841	0.449844	0.524	1.24233	-0.953119	7.27394e+09	9.86177	0.000417346	46.1473	1.66415	660.466	0.0660466	-1.18015	29.4245	1.46871	0.226
Nepal	2005	52	5	2.83292	86.3477	776676	1.65874	27.6498	-2.0984	0.655	0.628	1	5.85366	81.1537	91.3535	82.6989	4.8561e+08	485.61	15.149	0.826551	0.533	1.07536	-0.742213	8.13026e+09	9.9101	-0.00245178	44.0629	1.64407	678.475	0.0678475	-1.16847	29.3129	1.46706	0.222
Nepal	2006	52	5	2.7241	86.8446	15593	1.80293	30.3297	-1.89445	0.719	0.629	1	5.88235	81.8421	91.4057	83.3208	5.2978e+08	529.78	15.462	1.14139	0.581	0.885774	-0.692943	9.04372e+09	9.95635	0.00664798	44.762	1.65091	663.455	0.0663455	-1.17819	29.1943	1.4653	0.231
Nepal	2007	52	5	2.61577	87.3343	539324	1.94909	33.0558	-1.88538	0.886	0.811	1	17.3252	82.5291	91.4578	83.9382	5.4019e+08	540.19	15.781	1.41	0.731	0.731449	-0.791534	1.03256e+10	10.0139	-0.00574171	44.5793	1.64913	653.868	0.0653868	-1.18451	29.0617	1.46332	0.274
Nepal	2008	52	5	2.50794	87.8155	927049	2.09719	35.8274	-1.83429	0.892	0.844	1	33.165	83.215	91.5098	84.5508	5.7234e+08	572.34	16.105	1.73	0.758	0.62651	-0.818008	1.25454e+10	10.0985	-0.000995124	46.0362	1.6631	719.461	0.0719461	-1.14299	28.9641	1.46186	0.477
Nepal	2009	52	5	2.40064	88.2891	319218	2.24719	38.6441	-1.62008	0.914	0.854	1	25.2451	83.8996	91.5616	85.1587	6.3524e+08	635.24	16.434	1.97	0.781	0.539423	-0.704491	1.2855e+10	10.1091	-0.0382713	47.0794	1.67283	818.675	0.0818675	-1.08689	28.8804	1.4606	0.555
Nepal	2010	52	5	2.29388	88.7542	71594	2.39907	41.5057	-1.58397	0.91	0.836	1	33.165	84.5829	91.6132	85.7618	8.066e+08	806.6	16.768	7.93	0.772	0.496881	-0.695683	1.60027e+10	10.2042	-0.0877417	45.9849	1.66262	868.669	0.0868669	-1.06115	28.7827	1.45913	0.549
Nepal	2011	52	5	2.18767	89.2156	117279	2.55278	44.4117	-1.41644	0.91	0.852	1	33.165	85.265	91.6647	86.3599	7.394e+08	739.4	17.108	9	0.772	0.385214	-0.78744	2.15739e+10	10.3339	-0.0940222	36.2968	1.55987	922.143	0.0922143	-1.0352	28.7869	1.45919	0.551
Nepal	2012	52	5	2.08196	89.6682	523237	2.70827	47.3623	-1.38123	0.911	0.852	1	33.165	85.9459	91.716	86.9533	7.8102e+08	781.02	17.458	11.1493	0.677	0.235525	-0.814643	2.17031e+10	10.3365	-0.0919542	37.9219	1.57889	967.206	0.0967206	-1.01448	28.7478	1.4586	0.389
Nepal	2013	52	5	1.97683	90.1119	9341025	2.86551	50.3565	-1.12915	0.855	0.819	1	33.165	86.6256	91.7672	87.5416	8.8785e+08	887.85	17.815	13.3	0.67	0.185922	-0.688967	2.21622e+10	10.3456	-0.0741796	41.8654	1.62185	1020.58	0.102058	-0.991153	28.7478	1.4586	0.279
Nepal	2014	52	5	1.87226	90.5461	349981	3.02444	53.3942	-0.7246	0.859	0.857	1	29.4807	87.304	91.8183	88.1248	8.8749e+08	887.49	18.182	15.44	0.688	0.293748	-0.588949	2.27316e+10	10.3566	-0.0304027	45.9826	1.66259	1099.44	0.109944	-0.958827	28.7478	1.4586	0.627
Nepal	2015	52	5	1.76829	90.9682	7711043	3.18502	56.4746	-0.99743	0.858	0.851	1	29.5493	87.9812	91.8692	88.7027	1.37977e+09	1379.77	18.557	17.5816	0.783	0.538271	-0.603534	2.43608e+10	10.3867	-0.0518957	46.6657	1.669	979.096	0.0979096	-1.00917	28.7478	1.4586	0.645
Nepal	2016	52	5	1.66494	91.3779	197648	3.34721	59.5972	-0.84699	0.886	0.855	1	29.5798	88.6571	91.92	89.2752	1.20809e+09	1208.09	18.942	20.7	0.777	0.904474	-0.826785	2.45241e+10	10.3896	-0.105996	42.1155	1.62444	1426.13	0.142613	-0.845841	28.7478	1.4586	0.662
Nepal	2017	52	5	1.56223	91.7753	6298246	3.51095	62.7616	-0.583757	0.878	0.861	1	29.5798	89.3319	91.9706	89.8421	1.41847e+09	1418.47	19.336	24.3	0.793	1.14995	-0.775454	2.89716e+10	10.462	-0.196265	44.6424	1.64975	1614.76	0.161476	-0.791893	28.7478	1.4586	0.663
Nepal	2018	52	5	1.4602	92.1607	678415	3.67619	65.967	-0.543023	0.857	0.854	1	32.7273	90.0053	92.021	90.4032	1.55882e+09	1558.82	19.74	28.6	0.755	1.14055	-0.689043	3.31115e+10	10.52	-0.0682618	48.4474	1.68527	1753.6	0.17536	-0.756069	28.7478	1.4586	0.636
Nepal	2019	52	5	1.35886	92.5341	5118957	3.84288	69.2128	-0.45366	0.808	0.823	1	32.7273	90.6776	92.0714	90.9585	1.44938e+09	1449.38	20.153	34.8055	0.76	1.13635	-0.691427	3.41862e+10	10.5339	-0.185563	49.2495	1.6924	1700.58	0.170058	-0.769402	28.7478	1.4586	0.601
Nepal	2020	52	5	1.25824	92.8958	9622104	4.01096	72.4985	-0.178229	0.822	0.807	1	32.7273	91.3486	92.1215	91.5076	1869000000	1869	20.576	37.6984	0.761	1.77427	-0.598486	3.34337e+10	10.5242	-0.126626	40.9189	1.61192	1677.8	0.16778	-0.77526	28.7478	1.4586	0.598
Nepal	2021	52	5	1.15838	93.0159	4189754	4.1804	75.8233	-0.18771	0.808	0.855	1	32.7273	92.0183	92.1715	92.0505	1.59849e+09	1598.49	21.008	41.6083	0.766	2.31172	-0.556707	3.69248e+10	10.5673	-0.196326	43.0538	1.63401	1607.63	0.160763	-0.793813	28.7478	1.4586	0.609
Nepal	2022	52	5	1.15686	98.0818	4329638	4.17508	79.1867	-0.239197	0.837	0.859	1	33.0909	92.6869	92.2214	92.587	1.26387e+09	1263.87	21.451	49.5609	0.766	1.69225	-0.532767	4.11829e+10	10.6147	-0.0660597	48.9734	1.68996	1642.72	0.164272	-0.784437	28.7478	1.4586	0.633
Comores	2000	53	1	1.70627	96.7204	6826243	1.66318	24.4251	0.0227586	0.71	0.594	1	3.0303	86.8976	88.4687	87.3388	3.252e+07	32.52	28.08	0.271741	0.421	1.94043	-0.962092	3.51137e+08	8.54548	-0.000747987	35.7575	1.55337	816.702	0.0816702	-1.08794	71.4669	1.85411	0.227
Comores	2001	53	1	1.62778	96.9352	8696957	1.66117	26.1546	0.212404	0.709	0.626	1	3.0303	87.0387	88.7868	87.5288	4.611e+07	46.11	28.036	0.443068	0.421	2.02552	-0.684288	3.78512e+08	8.57808	-0.000763073	35.7572	1.55336	835.325	0.0835325	-1.07814	72.5416	1.86059	0.227
Comores	2002	53	1	1.5492	97.0909	574884	2.38767	27.7108	0.402049	0.708	0.711	1	3.0303	86.8707	88.8561	87.4265	4.344e+07	43.44	27.992	0.55487	0.421	2.0431	-0.674768	4.25965e+08	8.62937	-0.000732902	35.7571	1.55336	823.612	0.0823612	-1.08428	72.5416	1.86059	0.327
Comores	2003	53	1	1.47054	97.242	2459955	3.11186	29.2481	-0.673141	0.708	0.739	1	3.0303	86.7017	88.9237	87.3227	3.306e+07	33.06	27.947	0.848189	0.431	1.96309	-0.693808	5.46885e+08	8.7379	-0.000793244	35.757	1.55336	1032.14	0.103214	-0.986263	72.5416	1.86059	0.386
Comores	2004	53	1	1.39178	97.5976	4352474	3.83371	30.7669	-0.163162	0.708	0.751	1	3.0303	86.5317	88.9894	87.2175	3.134e+07	31.34	27.903	1.32733	0.431	1.91514	-0.864246	6.33706e+08	8.80189	-0.00067256	35.7571	1.55336	1111.63	0.111163	-0.954041	72.5416	1.86059	0.423
Comores	2005	53	1	1.31272	97.7442	6251507	4.55305	32.2697	-0.436264	0.708	0.756	1	3.0303	86.3607	89.0534	87.1113	2.741e+07	27.41	27.875	2	0.487	1.96439	-0.88724	6.53845e+08	8.81547	-0.000558866	35.7574	1.55337	1046.98	0.104698	-0.98006	71.4669	1.85411	0.447
Comores	2006	53	1	1.23341	92.6111	815322	5.26976	33.7561	-0.360273	0.699	0.749	1	3.0303	86.1887	89.1156	87.0043	3.638e+07	36.38	27.863	2.2	0.48	2.00033	-0.700172	6.98432e+08	8.84412	-0.00077842	35.7573	1.55336	1194.37	0.119437	-0.922861	71.4669	1.85411	0.452
Comores	2007	53	1	1.1539	92.5025	5358	5.98374	35.2257	-1.09546	0.701	0.751	1	3.0303	86.0157	89.176	86.8964	4.436e+07	44.36	27.867	2.5	0.48	2.00423	-0.69156	7.95673e+08	8.90073	-0.00769195	33.1562	1.52056	773.59	0.077359	-1.11149	71.4669	1.85411	0.458
Comores	2008	53	1	1.07426	92.3933	1948996	6.69492	36.6779	-1.10721	0.701	0.751	1	3.0303	85.8417	89.2347	86.7879	4.038e+07	40.38	27.886	3	0.499	2.01729	-0.772487	9.15659e+08	8.96173	-0.00465057	36.2185	1.55893	772.859	0.0772859	-1.1119	71.4669	1.85411	0.458
Comores	2009	53	1	0.994515	92.2835	3835373	7.4032	38.1124	-0.765268	0.725	0.749	1	3.0303	85.6668	89.2916	86.6788	5.007e+07	50.07	27.921	3.5	0.488	2.04777	-0.812594	9.05341e+08	8.95681	-0.0138396	37.8969	1.5786	923.48	0.092348	-1.03457	71.4669	1.85411	0.458
Comores	2010	53	1	0.914712	92.173	570834	8.10848	39.529	-0.562939	0.738	0.723	1	3.0303	85.4908	89.3466	86.5694	7.296e+07	72.96	27.973	5.1	0.508	2.08415	-0.786249	9.07979e+08	8.95808	-0.00835041	39.5501	1.59715	1074.2	0.10742	-0.968916	71.4669	1.85411	0.445
Comores	2011	53	1	0.834915	92.0621	756472	8.81073	40.927	-0.552736	0.738	0.744	1	3.0303	85.3138	89.4	86.4595	5.32e+07	53.2	28.04	5.5	0.508	2.11863	-0.803917	1.02309e+09	9.00991	-0.0231184	40.001	1.60207	944.776	0.0944776	-1.02467	71.4669	1.85411	0.48
Comores	2012	53	1	0.755168	91.9513	9400187	9.5099	42.3061	-0.452308	0.738	0.744	1	3.0303	85.1358	89.4515	86.3495	1.0099e+08	100.99	28.123	5.9753	0.508	2.13824	-0.781552	1.01584e+09	9.00683	-0.0103752	40.8104	1.61077	961.38	0.096138	-1.0171	71.4669	1.85411	0.48
Comores	2013	53	1	0.675514	91.8407	121017	10.2059	43.6659	-0.256929	0.777	0.762	1	3.0303	84.9568	89.5013	86.2394	8.09e+07	80.9	28.223	6.5	0.504	2.14467	-0.732215	1.11622e+09	9.04775	-0.00481063	39.2433	1.59377	1122.83	0.112283	-0.949685	71.4669	1.85411	0.506
Comores	2014	53	1	0.596013	91.7308	299206	10.8987	45.0058	-0.18691	0.777	0.762	1	3.0303	84.7768	89.5493	86.1292	7.46e+07	74.6	28.338	6.98	0.504	2.15269	-0.586699	1.14959e+09	9.06054	-0.00468456	39.2358	1.59368	981.591	0.0981591	-1.00807	71.4669	1.85411	0.506
Comores	2015	53	1	0.595541	91.6219	395195	10.8773	46.3256	-0.244472	0.768	0.764	1	3.0303	84.5958	89.5955	86.0192	7.48e+07	74.8	28.47	7.45916	0.504	2.16006	-0.76992	9.6603e+08	8.98499	-0.0049367	37.805	1.57755	1036.38	0.103638	-0.984482	71.4669	1.85411	0.419
Comores	2016	53	1	0.59501	91.5145	382493	10.8736	47.6248	0.0220019	0.751	0.738	1	3.0303	84.4138	89.6399	85.9094	6.138e+07	61.38	28.619	7.93832	0.52	2.16962	-0.706794	1.01284e+09	9.00554	-0.00356982	37.1329	1.56976	1189.05	0.118905	-0.924798	70.9296	1.85083	0.407
Comores	2017	53	1	0.594421	91.4086	3684225	10.8696	48.9029	0.022408	0.728	0.73	1	6.06061	84.2308	89.6825	85.8	7.474e+07	74.74	28.784	8.47817	0.512	2.0469	-0.710438	1.07744e+09	9.03239	-0.00391947	40.1644	1.60384	1492.48	0.149248	-0.82609	70.3923	1.84752	0.397
Comores	2018	53	1	0.593774	91.3048	352995	10.8652	50.1595	-0.361613	0.719	0.72	1	6.06061	84.0468	89.7234	85.691	9.685e+07	96.85	28.965	8.20824	0.509	1.90503	-0.852027	1.1888e+09	9.07511	-0.00567235	42.9962	1.63343	1593.29	0.159329	-0.797706	70.3923	1.84752	0.379
Comores	2019	53	1	0.594097	91.3567	929087	10.8604	51.3942	-0.176798	0.643	0.649	1	6.06061	83.8618	89.7625	85.5827	8.006e+07	80.06	29.164	16.3838	0.506	1.87245	-1.05839	1.19502e+09	9.07738	-0.0043008	42.2681	1.62601	1685.73	0.168573	-0.773212	70.3923	1.84752	0.32
Comores	2020	53	1	0.593936	91.3308	641041	10.8628	52.6066	-0.287385	0.626	0.549	1	16.6667	83.6758	89.7998	85.475	1.3967e+08	139.67	29.38	21.1632	0.563	1.90094	-1.20918	1.22504e+09	9.08815	-0.00387585	33.7299	1.52802	1578.06	0.157806	-0.801876	70.3923	1.84752	0.289
Comores	2021	53	1	0.594017	91.3437	785064	10.8616	53.7961	-0.227991	0.627	0.555	1	16.6667	83.4888	89.8354	85.3682	1.5364e+08	153.64	29.613	27.3369	0.569	1.89944	-1.31024	1.29609e+09	9.11263	-0.00402477	42.2777	1.62611	1633.78	0.163378	-0.786805	70.3923	1.84752	0.29
Comores	2022	53	1	0.593976	91.3373	713052	10.8622	54.9624	-0.226411	0.625	0.503	1	16.6667	83.3008	89.8692	85.2623	1.4677e+08	146.77	29.864	24.2501	0.538	1.82699	-1.24499	1.24252e+09	9.0943	-0.00412867	47.7817	1.67926	1605.92	0.160592	-0.794275	70.3923	1.84752	0.282
Algérie	2000	54	2	0.470645	95.3874	1419854	5.53854	84.4808	-1.43258	0.662	0.442	1	3.42105	81.8016	93.8048	88.9938	3.3606e+08	336.06	59.919	0.491706	0.561	1.40229	-0.987298	5.47904e+10	10.7387	-1.32822	62.8583	1.79836	9746.52	0.974652	-0.0111502	16.8033	1.22539	0.325
Algérie	2001	54	2	0.445209	95.6309	923853	5.51749	84.7599	-1.53357	0.662	0.442	1	3.42105	81.9467	93.844	89.1698	3.5019e+08	350.19	60.712	0.646114	0.561	1.37593	-0.822	5.94134e+10	10.7739	-1.30756	54.5296	1.73663	9961.64	0.996164	-0.00166916	16.8402	1.22635	0.325
Algérie	2002	54	2	0.420426	95.87	7096078	5.49616	85.0328	-1.63457	0.662	0.411	1	3.42105	82.0918	93.8832	89.3436	3.0624e+08	306.24	61.501	1.59164	0.58	1.34887	-0.928755	6.15161e+10	10.789	-1.34887	56.5896	1.75274	10180.4	1.01804	0.00776271	16.7336	1.22359	0.327
Algérie	2003	54	2	0.396305	96.1044	4993188	5.47465	85.2992	-1.75441	0.662	0.411	1	6.16967	82.2368	93.9225	89.5151	3.2353e+08	323.53	62.284	2.19536	0.58	1.35424	-0.715244	7.34823e+10	10.8662	-1.26625	57.7691	1.7617	10510.5	1.05105	0.0216218	16.7549	1.22414	0.333
Algérie	2004	54	2	0.372841	96.3342	2929358	5.45297	85.5591	-1.35919	0.662	0.414	1	6.16967	82.3819	93.9617	89.6842	3.8256e+08	382.56	63.061	4.63448	0.57	1.40727	-0.699273	9.19137e+10	10.9634	-1.4315	61.358	1.78787	10759	1.0759	0.0317728	17.2752	1.23742	0.338
Algérie	2005	54	2	0.350041	96.5595	905004	5.43121	85.8123	-0.913666	0.666	0.415	1	6.16967	82.527	94.0009	89.8508	4.0944e+08	409.44	63.83	5.84394	0.595	1.36408	-0.46642	1.07047e+11	11.0296	-1.101	66.8405	1.82504	11113.7	1.11137	0.0458596	17.3029	1.23812	0.342
Algérie	2006	54	2	0.327881	96.7802	891885	5.40928	86.0591	-1.12641	0.666	0.415	1	6.16967	82.6721	94.0401	90.015	2.7169e+08	271.69	64.593	7.37598	0.595	1.44114	-0.564963	1.23084e+11	11.0902	-1.762	65.9153	1.81899	11342	1.1342	0.0546889	17.2903	1.2378	0.342
Algérie	2007	54	2	0.306367	96.9965	6971145	5.38729	86.2994	-1.15059	0.663	0.392	1	7.71208	82.8171	94.0793	90.1767	4.0319e+08	403.19	65.348	9.45119	0.595	1.62791	-0.592309	1.42483e+11	11.1538	-1.53975	67.5455	1.8296	11759.7	1.17597	0.0703963	17.3201	1.23855	0.334
Algérie	2008	54	2	0.285478	97.2084	5060713	5.36514	86.5336	-1.09585	0.666	0.379	1	7.71208	82.9622	94.1185	90.3362	3.0977e+08	309.77	66.097	10.18	0.595	1.70897	-0.633445	1.80384e+11	11.2562	-2.32075	71.0285	1.85143	12252.3	1.22523	0.0882175	17.344	1.23915	0.329
Algérie	2009	54	2	0.265285	97.4155	3191638	5.34352	86.7595	-1.19691	0.667	0.375	1	7.71208	83.1073	94.1577	90.4919	2.8983e+08	289.83	66.826	11.23	0.613	1.7959	-0.614938	1.50317e+11	11.177	-2.53251	64.2848	1.80811	12753.1	1.27531	0.105616	17.3739	1.2399	0.328
Algérie	2010	54	2	0.245737	97.6182	1361005	5.32219	86.9781	-1.25937	0.667	0.363	1	7.71208	83.2524	94.197	90.6443	2.0549e+08	205.49	67.54	12.5	0.61	1.8587	-0.552147	1.77785e+11	11.2499	-2.08114	63.4912	1.80271	12243.2	1.22432	0.0878934	17.3713	1.23983	0.326
Algérie	2011	54	2	0.226832	97.8163	9568614	5.30132	87.1892	-1.36056	0.665	0.378	1	7.96915	83.3974	94.2362	90.7934	1.8964e+08	189.64	68.236	14.9	0.613	1.89839	-0.5727	2.18332e+11	11.3391	-2.03732	62.2201	1.79393	12710.5	1.27105	0.104164	17.3772	1.23998	0.326
Algérie	2012	54	2	0.208545	98.0102	7812915	5.26498	87.0935	-1.32504	0.668	0.371	1	31.6017	83.5518	94.2939	90.9547	1.529e+08	152.9	68.915	18.2	0.726	1.9431	-0.521545	2.27144e+11	11.3563	-1.54184	60.7576	1.7836	13624.9	1.36249	0.134334	17.3815	1.24009	0.327
Algérie	2013	54	2	0.190859	98.1998	609298	5.22896	86.9869	-1.20237	0.67	0.377	1	31.6017	83.7061	94.3517	91.1129	2.0518e+08	205.18	69.576	22.5	0.777	1.96672	-0.472967	2.29701e+11	11.3612	-1.96364	59.151	1.77196	14130.7	1.41307	0.150165	17.3955	1.24044	0.328
Algérie	2014	54	2	0.173745	98.3855	4407178	5.19319	86.8698	-1.19054	0.666	0.373	1	31.6017	83.8605	94.4094	91.2681	1.5705e+08	157.05	70.221	29.5	0.784	1.97905	-0.613118	2.38943e+11	11.3783	-1.52078	56.9235	1.75529	15108.6	1.51086	0.179225	17.3953	1.24043	0.326
Algérie	2015	54	2	0.157193	98.5673	2754688	5.15778	86.7425	-1.09079	0.667	0.386	1	31.6017	84.0149	94.4672	91.4202	8.056e+07	80.56	70.848	38.2	0.78	1.99995	-0.639463	1.87494e+11	11.273	0.638915	53.2046	1.72595	15616.3	1.56163	0.193578	17.4059	1.2407	0.328
Algérie	2016	54	2	0.141174	98.7454	1133953	5.12265	86.6055	-1.09974	0.569	0.365	1	31.6017	84.1694	94.525	91.5694	1.6498e+08	164.98	71.459	42.9455	0.796	1.99343	-0.673701	1.80764e+11	11.2571	-1.59172	49.7609	1.69689	15295.1	1.52951	0.184554	17.3655	1.23969	0.308
Algérie	2017	54	2	0.125676	98.9199	95441663	5.08793	86.4588	-0.919614	0.571	0.378	1	25.7576	84.3239	94.5828	91.7156	1.9509e+08	195.09	72.052	47.6911	0.742	1.957	-0.598896	1.89881e+11	11.2785	-1.23881	49.8208	1.69741	15164	1.5164	0.180814	17.355	1.23942	0.307
Algérie	2018	54	2	0.110673	99.091	79837924	5.05353	86.3031	-0.842108	0.587	0.387	1	25.7576	84.4784	94.6406	91.8591	1.5372e+08	153.72	72.629	49.0385	0.788	1.90333	-0.658904	1.94554e+11	11.289	-0.619905	52.4362	1.71963	15971.1	1.59711	0.203334	17.365	1.23967	0.309
Algérie	2019	54	2	0.0961471	99.2587	64518666	5.01953	86.1385	-1.05585	0.513	0.383	1	25.7576	84.6329	94.6985	91.9998	1.8953e+08	189.53	73.189	58.9776	0.768	1.83944	-0.65617	1.9346e+11	11.2866	-1.35005	46.5068	1.66752	16259.1	1.62591	0.211095	17.365	1.23967	0.292
Algérie	2020	54	2	0.0820783	99.4232	4947109	4.98588	85.9655	-0.84782	0.522	0.317	1	25.7576	84.7875	94.7563	92.1378	222000000	222	73.733	60.6534	0.767	1.73246	-0.666827	1.64873e+11	11.2172	-1.12931	40.3898	1.60627	14933.8	1.49338	0.174171	17.365	1.23967	0.279
Algérie	2021	54	2	0.0684475	99.5847	34683487	4.95262	85.7843	-0.992457	0.504	0.299	1	8.10811	84.9421	94.8142	92.2732	2.1445e+08	214.45	74.261	66.2356	0.66	1.6577	-0.635961	1.86231e+11	11.2701	-0.920974	46.8371	1.67059	15914.5	1.59145	0.201792	17.365	1.23967	0.281
Algérie	2022	54	2	0.0680298	99.5874	34456024	4.92601	85.8263	-0.650652	0.416	0.298	1	8.10811	84.9421	94.8142	92.3237	2.3293e+08	232.93	74.772	71.2432	0.616	1.62834	-0.638041	2.25638e+11	11.3534	-0.155427	51.2024	1.70929	15252.1	1.52521	0.18333	17.365	1.23967	0.27
Mongolie	2000	55	7	18.2821	85.7368	943586	6.27895	43.351	0.821868	0.902	0.874	1	10.5263	28.77	87.6595	62.4153	2.2761e+08	227.61	57.133	1.25565	0.841	1.32711	-0.266556	1.1369e+09	9.05572	-0.053697	121.887	2.08596	17691.6	1.76916	0.247767	84.3135	1.9259	0.677
Mongolie	2001	55	7	17.3559	86.1301	385304	6.36571	43.9293	0.996423	0.902	0.875	1	10.5263	30.1254	88.0043	63.8237	2.5668e+08	256.68	58.222	1.65324	0.841	1.22564	-0.0979822	1.268e+09	9.10312	-0.063	115.818	2.06378	17502.2	1.75022	0.243092	84.0935	1.92476	0.661
Mongolie	2002	55	7	16.4541	86.5596	8385515	6.44415	44.4988	1.17098	0.902	0.875	1	10.5263	31.4889	88.3498	65.2097	2.5244e+08	252.44	59.304	2.03957	0.841	1.2853	0.0258806	1.39656e+09	9.14506	-0.077751	118.517	2.07378	18501.8	1.85018	0.267213	84.086	1.92472	0.669
Mongolie	2003	55	7	15.5769	86.9895	303427	6.51442	45.0592	0.963294	0.902	0.875	1	10.5263	32.8604	88.6959	66.5728	2.6898e+08	268.98	60.378	1.84641	0.842	1.27186	-0.221845	1.5953e+09	9.20284	-0.13154	120.299	2.08026	17411.4	1.74114	0.240833	73.5013	1.86629	0.67
Mongolie	2004	55	7	14.7244	87.4197	780014	6.57666	46.5657	0.775293	0.902	0.876	1	6.75676	34.2399	89.0427	67.9124	2.5741e+08	257.41	61.443	1.94299	0.816	1.12405	-0.269411	1.99207e+09	9.2993	-0.09292	131.329	2.11836	16947.1	1.69471	0.229097	73.4364	1.86591	0.673
Mongolie	2005	55	7	13.8979	87.8502	269137	6.63108	48.0797	0.878712	0.902	0.875	1	6.66667	35.6274	89.3901	69.2259	2.2378e+08	223.78	62.494	1.8947	0.816	1.10986	-0.604817	2.52347e+09	9.402	-0.18532	122.381	2.08772	17428	1.7428	0.241248	73.2917	1.86505	0.677
Mongolie	2006	55	7	13.0958	88.2811	769854	6.67782	49.6017	0.646907	0.9	0.892	1	6.57895	37.0229	89.7381	70.5155	2.0729e+08	207.29	63.535	1.91884	0.817	1.20548	-0.587645	3.41406e+09	9.53327	-0.19106	112.93	2.05281	18611.7	1.86117	0.269785	73.6631	1.86725	0.687
Mongolie	2007	55	7	12.3184	88.7122	282391	6.71705	51.1306	0.668378	0.9	0.892	1	6.57895	38.4264	90.0868	71.7805	2.0374e+08	203.74	64.564	9	0.817	1.34194	-0.613751	4.235e+09	9.62685	-0.360009	117.88	2.07144	19353.2	1.93532	0.286752	73.6328	1.86707	0.687
Mongolie	2008	55	7	11.5654	89.1438	80658	6.74895	52.6658	0.539785	0.894	0.881	1	4.16667	39.838	90.4362	73.0208	2.2262e+08	222.62	65.581	9.8	0.815	1.5768	-0.664763	5.62322e+09	9.74998	-0.838455	121.198	2.0835	18919.4	1.89194	0.276907	73.5214	1.86641	0.661
Mongolie	2009	55	7	10.8381	89.5756	343274	6.77386	54.2047	0.609987	0.9	0.889	1	5.37281	41.2575	90.7862	74.2337	2.5874e+08	258.74	66.58	10	0.814	1.79649	-0.761497	4.58385e+09	9.66123	-0.569804	107.814	2.03267	18920.9	1.89209	0.276942	73.3693	1.86551	0.66
Mongolie	2010	55	7	10.1343	90.0078	8912296	6.79181	55.7488	0.597042	0.901	0.889	1	3.94737	42.6851	91.1368	75.4225	3.0149e+08	301.49	67.567	10.2	0.813	1.74993	-0.733135	7.18948e+09	9.8567	-1.6291	103.35	2.01431	18202.3	1.82023	0.260126	73.3388	1.86533	0.677
Mongolie	2011	55	7	9.61354	90.4437	5433435	6.8233	57.1062	0.606539	0.901	0.889	1	3.94737	44.1206	91.4881	76.313	3.2849e+08	328.49	67.963	12.5	0.815	1.72658	-0.696975	1.04098e+10	10.0174	-4.4766	126.999	2.1038	18659.3	1.86593	0.270896	73.3265	1.86526	0.684
Mongolie	2012	55	7	9.18836	90.8833	2504883	6.86401	58.3639	0.471135	0.901	0.897	1	14.8649	45.5642	91.84	77.0456	446500000	446.5	68.03	16.4	0.865	1.89795	-0.535096	1.22928e+10	10.0896	-4.20782	109.589	2.03977	19704.6	1.97046	0.294567	73.2495	1.8648	0.691
Mongolie	2013	55	7	8.76453	91.3257	9582553	6.90344	59.6306	0.491321	0.893	0.88	1	14.8649	47.0157	92.1926	77.7798	4.3503e+08	435.03	68.097	17.7	0.862	2.06695	-0.478146	1.25821e+10	10.0998	-2.01872	100.312	2.00135	20522	2.0522	0.312219	73.2253	1.86466	0.691
Mongolie	2014	55	7	8.34229	91.7708	666795	6.94165	60.9059	0.791901	0.893	0.876	1	14.8649	48.4753	92.5458	78.5151	3.1579e+08	315.79	68.163	19.9424	0.852	2.18708	-0.472313	1.22265e+10	10.0873	-0.230687	109.322	2.03871	19699.5	1.96995	0.294456	73.0016	1.86333	0.692
Mongolie	2015	55	7	7.92113	92.218	375802	6.97854	62.1905	0.711832	0.89	0.864	1	14.4737	49.9429	92.8997	79.2523	2.646e+08	264.6	68.23	22.5	0.873	2.12867	-0.517774	1.16199e+10	10.0652	-0.0829112	89.6537	1.95257	19182.6	1.91826	0.282907	72.9902	1.86326	0.675
Mongolie	2016	55	7	7.50133	92.6671	85428	7.01416	63.484	0.7876	0.895	0.862	1	17.1053	51.4185	93.2542	79.991	3.4343e+08	343.43	68.297	22.2658	0.873	2.02737	-0.509957	1.11814e+10	10.0485	4.17088	101.055	2.00456	19692.1	1.96921	0.294292	72.9237	1.86287	0.676
Mongolie	2017	55	7	7.08308	93.1175	7958117	7.04857	64.786	0.783372	0.868	0.858	1	17.1053	52.9021	93.6093	80.7308	8.0765e+08	807.65	68.363	23.7143	0.878	1.92578	-0.475923	1.14808e+10	10.06	-1.44574	115.933	2.06421	21043.7	2.10437	0.323121	72.8636	1.86251	0.667
Mongolie	2018	55	7	6.66286	93.5689	5047617	7.08082	66.1021	0.83126	0.855	0.861	1	17.1053	54.3937	93.9652	81.4784	3.4797e+08	347.97	68.445	47.13	0.873	1.8648	-0.449106	1.31781e+10	10.1199	-1.9236	126.356	2.1016	22486.2	2.24862	0.351916	72.8416	1.86238	0.656
Mongolie	2019	55	7	6.24116	100	212489	7.11074	67.432	0.636751	0.863	0.852	1	17.3333	55.8933	94.3216	82.2332	3.2918e+08	329.18	68.543	51.08	0.867	1.83715	-0.455754	1.42064e+10	10.1525	-2.31637	124.397	2.09481	24279.4	2.42794	0.385238	72.8033	1.86215	0.659
Mongolie	2020	55	7	5.82538	100	9122915	7.13821	68.7756	0.717837	0.835	0.839	1	17.3333	57.401	94.6787	82.9947	7.2017e+08	720.17	68.657	62.5	0.852	1.80542	-0.494854	1.3313e+10	10.1243	-1.69315	112.839	2.05246	20376.9	2.03769	0.309138	72.3589	1.85949	0.636
Mongolie	2021	55	7	5.46152	100	55946	7.16321	70.1321	0.705919	0.802	0.818	1	17.1053	58.9166	95.0364	83.7616	2.8203e+08	282.03	68.785	81.6068	0.843	1.68496	-0.553672	1.52864e+10	10.1843	-2.06002	119.098	2.0759	22407.7	2.24077	0.350397	72.5811	1.86082	0.611
Mongolie	2022	55	7	5.09765	100	2056966	7.18542	71.5024	0.529954	0.772	0.74	1	17.1053	60.4402	95.3948	84.5344	2.9709e+08	297.09	68.93	83.9145	0.835	1.46705	-0.561183	1.71465e+10	10.2342	-2.42844	136.328	2.13458	21392.3	2.13923	0.330257	72.47	1.86016	0.572
Namibie	2000	56	1	9.5131	36.1649	1608534	7.36323	27.1488	-0.250101	0.823	0.887	1	25	65.7799	98.0794	76.2362	2.6043e+08	260.43	32.373	1.64474	0.802	2.3522	0.773133	3.92223e+09	9.59353	-0.184282	85.1322	1.93009	6971.66	0.697166	-0.156664	47.1523	1.6735	0.656
Namibie	2001	56	1	9.21111	38.1554	153975	7.40451	27.5998	-0.0506747	0.823	0.874	1	25	66.1332	97.9714	76.6073	1.9111e+08	191.11	32.898	2.41698	0.802	2.08953	0.151666	3.55734e+09	9.55113	-0.381653	88.5841	1.94736	7906.88	0.790688	-0.101995	47.1523	1.6735	0.655
Namibie	2002	56	1	8.86792	40.1427	842038	7.41183	28.1968	0.148751	0.823	0.874	1	25	66.4863	97.8635	77.0811	2.2104e+08	221.04	33.766	2.6337	0.802	1.75728	0.114023	3.34917e+09	9.52494	-0.179444	94.4152	1.97504	7473.25	0.747325	-0.126491	47.1523	1.6735	0.655
Namibie	2003	56	1	8.52155	42.1253	6642046	7.4123	28.8123	0.478074	0.823	0.868	1	26.3889	66.8391	97.7555	77.5699	2.0832e+08	208.32	34.709	3.35984	0.802	1.44425	0.189309	4.92644e+09	9.69253	-0.1576	95.9525	1.98206	7768.26	0.776826	-0.109676	47.1523	1.6735	0.656
Namibie	2004	56	1	8.18039	44.241	487164	7.41204	29.4178	0.664763	0.823	0.878	1	25	67.1918	97.6475	78.0541	2.2474e+08	224.74	35.666	3.80472	0.806	1.27571	0.115224	6.60921e+09	9.82015	-0.246102	81.8623	1.91308	7998.04	0.799804	-0.0970163	47.1523	1.6735	0.66
Namibie	2005	56	1	7.84521	46.3589	311358	7.41157	30.011	0.625976	0.823	0.878	1	26.9231	67.5443	97.5394	78.5321	1.4318e+08	143.18	36.632	4.01005	0.806	1.25364	0.150282	7.24837e+09	9.86024	-0.40024	80.6804	1.90677	8329.66	0.832966	-0.0793725	47.1523	1.6735	0.669
Namibie	2006	56	1	7.51575	48.4682	1365776	7.41058	30.5927	0.78225	0.823	0.882	1	26.9231	67.8965	97.4314	79.0046	184250000	184.25	37.61	4.39887	0.801	1.27859	0.196952	8.00178e+09	9.90319	-0.403785	86.834	1.93869	8203.54	0.820354	-0.0859988	47.1523	1.6735	0.669
Namibie	2007	56	1	7.19237	50.5678	963023	7.40927	31.1618	1.01876	0.823	0.861	1	26.9231	68.2486	97.3234	79.4709	2.4813e+08	248.13	38.598	4.83561	0.801	1.33213	0.311637	8.83954e+09	9.94643	-0.71783	104.979	2.0211	8337.07	0.833707	-0.0789868	47.1377	1.67337	0.662
Namibie	2008	56	1	6.87507	52.6575	7906446	7.40756	31.7186	1.20101	0.823	0.861	1	26.9231	68.6005	97.2153	79.9311	2.2299e+08	222.99	39.597	5.329	0.801	1.39985	0.64115	8.60743e+09	9.93487	-0.743268	119.644	2.07789	8670.4	0.86704	-0.0619611	47.1377	1.67337	0.661
Namibie	2009	56	1	6.56461	54.7371	619929	7.40604	32.2603	0.929571	0.823	0.862	1	26.9231	68.9522	97.1072	80.3834	3.5423e+08	354.23	40.601	6.5	0.794	1.47116	0.269764	8.93885e+09	9.95128	-0.765103	123.763	2.09259	8711.9	0.871189	-0.0598874	47.1377	1.67337	0.654
Namibie	2010	56	1	6.26043	56.8066	4504523	7.4041	32.7891	0.84694	0.822	0.889	1	24.359	69.3037	96.9992	80.8295	2.9048e+08	290.48	41.616	11.6	0.812	1.54841	0.31552	1.14314e+10	10.0581	-0.282624	108.072	2.03372	8834.81	0.883481	-0.053803	47.1389	1.67338	0.644
Namibie	2011	56	1	5.96314	58.8657	282614	7.40226	33.3029	0.911658	0.822	0.889	1	24.359	69.655	96.8911	81.2677	2.9669e+08	296.69	42.637	12	0.807	1.71587	0.277477	1.25234e+10	10.0977	-0.790121	102.189	2.0094	9036.28	0.903628	-0.0440101	47.1389	1.67338	0.649
Namibie	2012	56	1	5.67007	60.9145	1142783	7.39767	33.8119	0.978104	0.822	0.889	1	24.359	70.0061	96.783	81.7057	2.8616e+08	286.16	43.693	12.9414	0.807	2.22673	0.321496	1.30421e+10	10.1153	-1.03041	100.213	2.00093	9158.61	0.915861	-0.0381703	47.1389	1.67338	0.649
Namibie	2013	56	1	5.38415	62.9522	94761	7.39308	34.3053	0.95881	0.833	0.889	1	24.359	70.357	96.6749	82.1358	2.8907e+08	289.07	44.756	13.9	0.822	2.60199	0.303885	1.20433e+10	10.0807	-0.771818	97.7249	1.99001	9313.88	0.931388	-0.0308695	47.1389	1.67338	0.659
Namibie	2014	56	1	5.10546	64.9793	7826223	7.38849	34.783	0.608741	0.833	0.889	1	24.359	70.7078	96.5667	82.5579	2.4861e+08	248.61	45.826	14.84	0.838	2.61288	0.261381	1.24354e+10	10.0947	-0.423355	103.08	2.01317	9735.82	0.973582	-0.0116276	47.1389	1.67338	0.663
Namibie	2015	56	1	4.83432	66.9966	6195593	7.3842	35.2439	0.72526	0.837	0.878	1	41.3462	71.0583	96.4586	82.971	1.6507e+08	165.07	46.9	25.6879	0.838	2.65296	0.270016	1.13352e+10	10.0544	-0.734559	97.239	1.98784	10013.9	1.00139	0.00060312	47.1389	1.67338	0.719
Namibie	2016	56	1	4.57214	69.0035	4596224	7.38183	35.6822	0.699529	0.841	0.883	1	41.3462	71.4086	96.3505	83.371	1.9738e+08	197.38	47.961	31.0333	0.837	2.69728	0.280629	1.0722e+10	10.0303	-0.366551	93.9662	1.97297	9860.74	0.986074	-0.00609036	47.1401	1.67339	0.722
Namibie	2017	56	1	4.31907	71.0006	303043	7.38176	36.0971	0.621906	0.845	0.874	1	41.3462	71.7588	96.2423	83.7569	2.1324e+08	213.24	49.005	36.8374	0.821	2.73527	0.261463	1.28952e+10	10.1104	-0.34696	81.2197	1.90966	9969.97	0.996997	-0.00130628	47.1401	1.67339	0.718
Namibie	2018	56	1	4.07494	72.9865	1497717	7.38398	36.4891	0.685118	0.817	0.853	1	46.1538	72.1087	96.1341	84.1291	171750000	171.75	50.032	42.8	0.819	2.77246	0.306939	1.3682e+10	10.1362	-0.137553	81.7139	1.9123	9675.66	0.967565	-0.0143196	47.1401	1.67339	0.692
Namibie	2019	56	1	3.83954	66.7046	9997604	7.32122	36.9123	0.52889	0.817	0.813	1	42.7083	72.4776	96.1391	84.5549	1.5826e+08	158.26	51.042	49.8	0.83	2.79932	0.312311	1.25419e+10	10.0984	0.185464	82.9012	1.91856	9254.44	0.925444	-0.0336497	47.1401	1.67339	0.659
Namibie	2020	56	1	3.61282	67.493	8530793	7.25891	37.3148	0.512432	0.831	0.854	1	43.2692	72.8464	96.1441	84.9689	1.9108e+08	191.08	52.033	57.8608	0.838	2.9102	0.268674	1.05837e+10	10.0246	0.201567	76.9252	1.88607	8960.35	0.896035	-0.0476749	47.1401	1.67339	0.646
Namibie	2021	56	1	3.39458	68.2799	7096696	7.19709	37.697	0.518789	0.835	0.834	1	44.2308	73.2153	96.1491	85.3714	1.8259e+08	182.59	53.005	61.1132	0.825	2.95315	0.220229	1.24025e+10	10.0935	-0.82244	83.5443	1.92192	8748.27	0.874827	-0.0580777	47.1401	1.67339	0.637
Namibie	2022	56	1	3.33622	69.0655	6479228	7.10374	38.0587	0.559886	0.817	0.857	1	44.2308	73.5842	96.1541	85.762	3.3233e+08	332.33	53.956	62.215	0.834	2.77601	0.21513	1.25673e+10	10.0992	-1.04515	99.1082	1.99611	8854.31	0.885431	-0.0528452	47.1401	1.67339	0.645
Lesotho	2000	57	1	0.234037	98.7617	715382	11.414	13.911	0.0961097	0.697	0.844	1	3.79747	60.387	80.946	64.4059	6.297e+07	62.97	19.548	0.211806	0.693	0.0338894	-0.165395	8.87292e+08	8.94807	-0.0324039	163.731	2.21413	1235.52	0.123552	-0.908151	76.8775	1.8858	0.315
Lesotho	2001	57	1	0.509915	99.2374	7299	11.4247	15.4957	0.0243443	0.697	0.844	1	3.79747	60.8085	81.501	64.9608	9.005e+07	90.05	20.067	0.26115	0.693	-0.152818	-0.171986	8.25707e+08	8.91683	-0.0296952	163.762	2.21421	1251.15	0.125115	-0.902691	76.8775	1.8858	0.315
Lesotho	2002	57	1	0.782497	99.713	433346	11.4299	17.0718	-0.0474212	0.697	0.844	1	3.79747	61.2304	82.0575	65.5202	1.1915e+08	119.15	20.597	1.08394	0.728	-0.309045	-0.173949	7.75777e+08	8.88974	-0.0283913	163.701	2.21405	1287.35	0.128735	-0.890303	75.8893	1.88018	0.499
Lesotho	2003	57	1	1.05169	100	796772	11.4294	18.6189	0.0996745	0.697	0.844	1	11.6667	61.6529	82.6158	66.0838	1.0566e+08	105.66	21.137	1.5325	0.748	-0.48345	-0.170023	1.15783e+09	9.06364	-0.0439481	163.823	2.21438	1312.49	0.131249	-0.881905	75.8893	1.88018	0.619
Lesotho	2004	57	1	1.31738	100	163057	11.4229	20.1519	0.358145	0.697	0.844	1	11.6667	62.0759	83.1756	66.6522	1.1653e+08	116.53	21.689	2.17552	0.733	-0.704216	-0.106747	1.51124e+09	9.17933	-0.0556714	163.578	2.21373	1322.36	0.132236	-0.878651	76.2187	1.88206	0.619
Lesotho	2005	57	1	1.57952	100	533033	11.4102	21.6704	-0.00281134	0.697	0.844	1	11.6667	62.4994	83.7371	67.2245	8.004e+07	80.04	22.249	2.58025	0.745	-0.920091	0.0550843	1.68234e+09	9.22591	-0.0274383	164.068	2.21502	1564.16	0.156416	-0.80572	76.6469	1.88449	0.619
Lesotho	2006	57	1	1.83797	100	906319	11.3912	23.1744	-0.124705	0.697	0.844	1	11.6667	62.9234	84.3002	67.8015	8.134e+07	81.34	22.82	2.97971	0.756	-0.41112	0.0105841	1.80009e+09	9.25529	-0.0243223	163.088	2.21242	1662.71	0.166271	-0.779182	75.9881	1.88075	0.619
Lesotho	2007	57	1	2.09499	77.0506	298315	11.3694	24.6558	-0.391314	0.693	0.843	1	23.5294	63.3478	84.8649	68.3622	1.2694e+08	126.94	23.304	3.44543	0.789	0.42095	-0.0582024	1.68213e+09	9.22586	-0.0756188	165.049	2.21761	2002.34	0.200234	-0.698462	76.7128	1.88487	0.573
Lesotho	2008	57	1	2.3488	77.4171	693483	11.342	26.124	-0.204756	0.693	0.842	1	25	63.7728	85.4313	68.9267	1.2645e+08	126.45	23.796	3.58	0.789	0.677229	0.0618668	1.7669e+09	9.24721	-0.01101	161.127	2.20717	1805.36	0.180536	-0.743436	77.7997	1.89098	0.566
Lesotho	2009	57	1	2.59942	77.7842	92384	11.3089	27.5788	0.326156	0.688	0.842	1	24.2647	64.1983	85.9993	69.4944	1.1976e+08	119.76	24.293	3.72	0.789	0.726654	0.171798	1.74089e+09	9.24077	-0.0913484	158.895	2.20111	2048.81	0.204881	-0.688499	77.0422	1.88673	0.563
Lesotho	2010	57	1	2.84672	78.1515	494648	11.27	29.0205	0.456775	0.707	0.842	1	24.1667	64.6243	86.569	70.0661	2.7921e+08	279.21	24.798	3.86	0.81	0.772822	0.184215	2.23475e+09	9.34923	-0.00950867	150.102	2.17639	2175.06	0.217506	-0.662528	76.614	1.88431	0.573
Lesotho	2011	57	1	3.09064	78.5196	900531	11.2251	30.4489	0.383941	0.707	0.842	1	24.1667	65.0508	87.1402	70.6416	2.7187e+08	271.87	25.31	7	0.81	0.885634	0.156146	2.57941e+09	9.41152	-0.0611733	149.797	2.1755	1932.63	0.193263	-0.713851	76.1528	1.88169	0.583
Lesotho	2012	57	1	3.33605	78.8875	326731	11.1824	31.8586	0.274199	0.702	0.843	1	26.6667	65.4777	87.7132	71.1931	3.0477e+08	304.77	25.704	10	0.812	1.00511	0.126534	2.4777e+09	9.39405	-0.0566527	150.209	2.17669	2021.04	0.202104	-0.694426	75.2734	1.87664	0.585
Lesotho	2013	57	1	3.5789	79.2557	756112	11.1351	33.2568	0.338074	0.74	0.843	1	26.6667	65.9052	88.2877	71.7473	3.5039e+08	350.39	26.101	15	0.807	1.08291	0.279383	2.36711e+09	9.37422	-0.0504275	133.365	2.12504	2043.13	0.204313	-0.689705	74.1798	1.87029	0.629
Lesotho	2014	57	1	3.81912	79.6067	1886	11.0831	34.6437	-0.332812	0.742	0.843	1	26.6667	66.3332	88.8639	72.3043	1.1365e+08	113.65	26.502	22	0.81	1.14032	0.199571	2.44106e+09	9.38758	-0.0944601	126.292	2.10138	2074.06	0.207406	-0.683178	74.9769	1.87493	0.629
Lesotho	2015	57	1	4.05662	79.9577	624125	11.0262	36.0193	-0.318708	0.706	0.845	1	25	66.7617	89.4417	72.8644	9.857e+07	98.57	26.908	25	0.81	1.172	0.0233269	2.35969e+09	9.37285	-0.11322	129.723	2.11302	2002.84	0.200284	-0.698354	73.2213	1.86464	0.596
Lesotho	2016	57	1	4.29146	80.3082	62987	10.9644	37.3836	-0.244856	0.669	0.845	1	25	67.1907	90.0211	73.4273	1.2749e+08	127.49	27.317	32.4539	0.805	1.21894	-0.0524279	2.11443e+09	9.32519	-0.0792345	136.315	2.13454	2142.46	0.214246	-0.669087	77.6021	1.88987	0.576
Lesotho	2017	57	1	4.52356	80.6586	505109	10.8975	38.7366	-0.194125	0.696	0.844	1	22.1311	67.6202	90.6022	73.9931	1.6166e+08	161.66	27.73	39	0.745	1.24493	-0.0590584	2.30674e+09	9.363	-0.0421688	146.367	2.16544	2253.62	0.225362	-0.64712	79.6443	1.90115	0.503
Lesotho	2018	57	1	4.75253	81.0088	949921	10.825	40.0785	-0.188606	0.736	0.843	1	22.1311	68.0502	91.1849	74.5633	1.6501e+08	165.01	28.153	40.8	0.78	1.22069	-0.137125	2.55625e+09	9.4076	-0.0408741	144.435	2.15967	2182.02	0.218202	-0.661142	80.1482	1.90389	0.596
Lesotho	2019	57	1	4.97834	81.3372	397659	10.7466	41.4091	-0.42798	0.776	0.854	1	23.3333	68.4807	91.7692	75.1377	1.5116e+08	151.16	28.585	42.3017	0.752	1.1747	-0.122618	2.3907e+09	9.37853	-0.0357326	140.517	2.14773	2188.86	0.218886	-0.659782	70.5534	1.84852	0.627
Lesotho	2020	57	1	5.20078	81.665	848249	10.6621	42.7284	-0.253513	0.791	0.854	1	23.3333	68.9116	92.3552	75.7168	1.799e+08	179.9	29.028	40.4172	0.797	1.18432	-0.141022	2.0537e+09	9.31254	-0.0280017	141.097	2.14952	2092.53	0.209253	-0.679328	85.639	1.93267	0.635
Lesotho	2021	57	1	5.17183	81.9923	550076	10.6493	44.0364	-0.213225	0.77	0.844	1	23.3333	69.3431	92.9428	76.3003	1.792e+08	179.2	29.48	43.6957	0.815	1.14804	-0.345277	2.41213e+09	9.3824	0.0123722	139.186	2.1436	2132.81	0.213281	-0.671047	78.0962	1.89263	0.623
Lesotho	2022	57	1	5.14218	82.3193	252179	10.6349	45.3328	-0.292737	0.808	0.881	1	26.4463	69.7751	93.532	76.8887	1.5281e+08	152.81	29.943	47.0368	0.832	1.08048	-0.368641	2.35468e+09	9.37193	0.00782007	142.374	2.15343	2112.67	0.211267	-0.675168	81.8676	1.91311	0.646
Honduras	2000	58	4	3.14571	99.423	368257	0.135001	64.5086	-0.0785964	0.744	0.785	1	9.375	76.8882	96.2749	85.701	6.1663e+08	616.63	45.458	1.20386	0.666	2.73259	-0.96987	7.18664e+09	9.85653	-0.375159	120.392	2.0806	3657.39	0.365739	-0.436829	26.2311	1.41882	0.565
Honduras	2001	58	4	2.9532	99.4373	99666	0.135734	65.5099	-0.165519	0.744	0.784	1	9.375	77.5014	96.4355	86.2043	8.6852e+08	868.52	45.964	1.41528	0.64	2.70297	-0.996991	7.65116e+09	9.88373	-0.301443	115.943	2.06424	3886.62	0.388662	-0.410427	26.2401	1.41896	0.564
Honduras	2002	58	4	2.75665	99.4473	608896	0.136429	66.5349	-0.252441	0.744	0.783	1	9.375	78.1146	96.5962	86.7289	5.5463e+08	554.63	46.61	2.5974	0.64	2.64114	-1.01955	7.85826e+09	9.89533	-0.268668	117.997	2.07187	3824.13	0.382413	-0.417467	27.0623	1.43236	0.555
Honduras	2003	58	4	2.56346	99.4567	222446	0.183531	67.5561	-0.379858	0.765	0.795	1	5.46875	78.6696	96.7236	87.2032	4.2889e+08	428.89	47.267	4.8	0.64	2.56598	-0.974429	8.23039e+09	9.91542	-0.39058	122.248	2.08724	4087.41	0.408741	-0.388552	28.1795	1.44993	0.569
Honduras	2004	58	4	2.37411	99.4628	838394	0.23089	68.5719	-0.391062	0.765	0.795	1	5.46875	79.2236	96.8509	87.6718	6.741e+08	674.1	47.927	5.6	0.64	2.49393	-0.946082	8.8693e+09	9.94789	-0.552885	135.462	2.13182	4235.93	0.423593	-0.373051	28.0633	1.44814	0.569
Honduras	2005	58	4	2.18882	99.4701	4573765	0.278491	69.5815	-0.623264	0.765	0.798	1	23.4375	79.7767	96.978	88.134	7.6646e+08	766.46	48.585	6.5	0.722	2.42763	-0.819756	9.75701e+09	9.98932	-0.600807	136.49	2.1351	4243.71	0.424371	-0.372255	28.1527	1.44952	0.563
Honduras	2006	58	4	2.00742	99.4827	78896	0.326312	70.5856	-0.667904	0.796	0.833	1	23.4375	80.3289	97.1051	88.5903	5.9674e+08	596.74	49.245	7.8	0.727	2.35855	-0.833332	1.09175e+10	10.0381	-0.668507	133.132	2.12428	3989.09	0.398909	-0.399126	28.242	1.4509	0.516
Honduras	2007	58	4	1.83	85.486	7032	0.374336	71.5838	-0.43703	0.802	0.833	1	23.4375	80.8802	97.232	89.0406	3.9224e+08	392.24	49.905	9.4	0.727	2.29768	-0.791543	1.23613e+10	10.0921	-0.926081	135.071	2.13056	4827.85	0.482785	-0.316246	28.242	1.4509	0.515
Honduras	2008	58	4	1.65653	86.0501	330173	0.422544	72.5765	-0.527116	0.791	0.833	1	23.4375	81.4306	97.3589	89.4849	4.2483e+08	424.83	50.566	9.6	0.726	2.24386	-0.915665	1.38817e+10	10.1424	-1.00734	135.749	2.13274	4677.78	0.467778	-0.32996	28.4565	1.45418	0.516
Honduras	2009	58	4	1.4871	86.6345	9601736	0.470923	73.563	-0.308192	0.617	0.756	1	23.4375	81.98	97.4856	89.9228	4.0032e+08	400.32	51.225	9.8	0.678	2.18879	-0.908243	1.45875e+10	10.164	-0.505263	96.905	1.98635	4338.67	0.433867	-0.362644	28.5995	1.45636	0.442
Honduras	2010	58	4	1.32162	87.2141	5928392	0.51945	74.5439	-0.49691	0.646	0.765	1	17.9688	82.5286	97.6122	90.3547	5.0786e+08	507.86	51.885	11.09	0.692	2.12597	-0.88917	1.58393e+10	10.1997	-0.970576	109.442	2.03918	4439.49	0.443949	-0.352667	29.2251	1.46576	0.41
Honduras	2011	58	4	1.16017	87.7875	228516	0.568114	75.5189	-0.390435	0.679	0.779	1	19.5312	83.0763	97.7387	90.7804	3.638e+08	363.8	52.543	15.9	0.711	2.0668	-0.833936	1.77103e+10	10.2482	-1.0123	122.217	2.08713	4406.68	0.440668	-0.355888	29.6094	1.47143	0.421
Honduras	2012	58	4	1.00267	88.3538	866861	0.616891	76.4883	-0.350116	0.673	0.779	1	19.5312	83.623	97.8651	91.2001	5.8476e+08	584.76	53.202	18.12	0.713	2.02251	-0.955132	1.85286e+10	10.2678	-0.850958	121.188	2.08346	4707.27	0.470727	-0.327231	30.0295	1.47755	0.42
Honduras	2013	58	4	0.849189	88.9137	5083127	0.665774	77.4518	-0.438612	0.68	0.771	1	19.5312	84.1688	97.9914	91.6134	645500000	645.5	53.858	17.8	0.735	1.97914	-0.945059	1.84997e+10	10.2672	-0.991606	116.306	2.0656	4629.15	0.462915	-0.334499	30.1367	1.4791	0.418
Honduras	2014	58	4	0.699666	89.4668	1525407	0.714738	78.4097	-0.534084	0.679	0.803	1	25.7812	84.7138	98.1176	92.0207	6.2489e+08	624.89	54.514	23	0.735	1.93678	-0.787561	1.97565e+10	10.2957	-1.31482	112.975	2.05298	4979.01	0.497901	-0.302857	30.1814	1.47974	0.437
Honduras	2015	58	4	0.554157	90.0133	8000493	0.763786	79.3615	-0.472758	0.662	0.803	1	25.7812	85.2578	98.2437	92.4215	614750000	614.75	55.165	27.1395	0.733	1.90365	-0.589746	2.09798e+10	10.3218	-0.95158	107.264	2.03046	5439.81	0.54398	-0.264417	30.1814	1.47974	0.433
Honduras	2016	58	4	0.412599	90.5527	4506116	0.812897	80.3075	-0.437456	0.659	0.803	1	25.7812	85.8009	98.3696	92.8159	4.6934e+08	469.34	55.813	29.5282	0.725	1.87757	-0.679403	2.17176e+10	10.3368	-0.900073	99.8157	1.9992	5242.27	0.524227	-0.280481	30.6194	1.486	0.431
Honduras	2017	58	4	0.27497	91.0855	104303	0.862061	81.2477	-0.565637	0.677	0.792	1	25.7812	86.3431	98.4955	93.204	4.9119e+08	491.19	56.457	31.7358	0.731	1.85008	-0.738785	2.31362e+10	10.3643	-1.03502	101.813	2.0078	5456.19	0.545619	-0.263111	31.1913	1.49403	0.414
Honduras	2018	58	4	0.141237	91.6113	7612047	0.911272	82.1821	-0.531821	0.656	0.795	1	21.0938	86.8844	98.6212	93.5856	7.1231e+08	712.31	57.096	36.0401	0.718	1.82995	-0.656895	2.40678e+10	10.3814	-0.89519	103.551	2.01515	5896.75	0.589675	-0.229387	31.379	1.49664	0.367
Honduras	2019	58	4	0.0212405	92.1305	411395	0.960517	83.1107	-0.569057	0.652	0.804	1	21.0938	87.4248	98.7468	93.961	4.8844e+08	488.44	57.73	39.3884	0.69	1.81064	-0.875854	2.48822e+10	10.3959	-0.49561	99.46	1.99765	5640.57	0.564057	-0.248677	31.379	1.49664	0.373
Honduras	2020	58	4	0.0209457	92.6425	9488204	1.00979	84.0338	-0.448508	0.683	0.801	1	21.0938	87.9643	98.8723	94.3301	1256500000	1256.5	58.359	45.2483	0.707	1.75456	-0.988051	2.33522e+10	10.3683	-0.373028	88.0009	1.94449	5048.45	0.504845	-0.296842	31.379	1.49664	0.376
Honduras	2021	58	4	0.0206374	93.1478	4932215	1.05907	84.9513	-0.627814	0.719	0.803	1	27.3438	88.5029	98.9977	94.6929	6.1731e+08	617.31	58.982	51.9801	0.727	1.66825	-1.09147	2.81443e+10	10.4494	-0.512675	103.373	2.01441	5086.93	0.508693	-0.293544	31.379	1.49664	0.395
Honduras	2022	58	4	0.0207915	93.6458	136146	1.05976	85.8634	-0.568362	0.884	0.858	1	27.3438	89.1075	98.9977	95.0904	8.1744e+08	817.44	59.6	59.7135	0.777	1.6768	-1.00229	3.1426e+10	10.4973	-0.737736	112.699	2.05192	5067.69	0.506769	-0.29519	31.379	1.49664	0.537
Uruguay	2000	59	4	0.173367	100	1885915	0.658714	93.4677	0.92935	0.948	0.899	1	12.1212	76.0878	98.8784	97.0616	3.228e+07	32.28	92.028	0.0772484	0.849	0.373945	0.957407	2.28233e+10	10.3584	-0.267809	36.7137	1.56483	14601.5	1.46015	0.164397	85.4645	1.93179	0.877
Uruguay	2001	59	4	0.167941	100	1368203	0.64966	93.4893	0.883838	0.948	0.899	1	12.1212	76.0878	98.8784	97.1242	2.492e+07	24.92	92.303	0.106001	0.849	0.246007	1.02357	2.08988e+10	10.3201	-0.290631	36.3095	1.56002	15946.6	1.59466	0.202668	85.4874	1.9319	0.877
Uruguay	2002	59	4	0.162692	100	867436	0.636462	93.5103	0.838327	0.948	0.899	1	12.1212	76.0878	98.8907	97.1962	2.539e+07	25.39	92.569	0.118228	0.849	0.14088	0.945743	1.36065e+10	10.1337	-0.180008	40.0291	1.60238	14137.8	1.41378	0.150382	85.2645	1.93077	0.877
Uruguay	2003	59	4	0.157582	100	37984	0.623469	93.5307	0.711257	0.948	0.899	1	12.1212	76.0878	98.903	97.2667	2.432e+07	24.32	92.828	0.201273	0.849	0.0707007	1.1014	1.20456e+10	10.0808	-0.401331	51.7592	1.71399	14181.1	1.41811	0.151711	85.2874	1.93088	0.877
Uruguay	2004	59	4	0.152649	100	9909146	0.610749	93.5504	0.590961	0.948	0.901	1	12.1212	76.0878	98.9152	97.3351	2.972e+07	29.72	93.078	0.34906	0.849	0.0597776	0.894058	1.36863e+10	10.1363	-0.314652	61.4767	1.78871	13627.5	1.36275	0.134417	84.7275	1.92802	0.878
Uruguay	2005	59	4	0.137839	100	8013775	0.603483	93.6843	0.777663	0.966	0.909	1	11.1111	77.4243	98.9725	97.5329	2.145e+07	21.45	93.319	0.542143	0.854	0.0798609	1.08177	1.73629e+10	10.2396	-0.811141	58.8777	1.76995	14696.4	1.46964	0.167211	84.7446	1.92811	0.894
Uruguay	2006	59	4	0.123813	100	6197209	0.596072	93.9898	0.8986	0.97	0.909	1	11.1111	78.7607	98.9725	97.723	2.824e+07	28.24	93.553	0.657593	0.854	0.113607	1.13004	1.97414e+10	10.2954	-1.49452	61.9716	1.79219	13377.3	1.33773	0.126369	83.9618	1.92408	0.897
Uruguay	2007	59	4	0.110556	100	4458028	0.588569	94.2928	0.835531	0.97	0.909	1	12.1212	80.0972	98.9725	97.9057	3.834e+07	38.34	93.779	0.7	0.854	0.17152	1.28094	2.37978e+10	10.3765	-1.24008	59.2104	1.7724	15803.5	1.58035	0.198752	83.1334	1.91978	0.897
Uruguay	2008	59	4	0.0980216	100	279145	0.580955	94.5938	0.845083	0.97	0.909	1	12.1212	81.4337	98.9725	98.0814	3.249e+07	32.49	93.998	0.81	0.854	0.212935	1.34595	3.11196e+10	10.493	-2.1166	65.2081	1.8143	16750.1	1.67501	0.224017	83.8418	1.92346	0.897
Uruguay	2009	59	4	0.0861933	100	1195778	0.573285	94.8926	0.789261	0.97	0.91	1	12.1212	82.7702	98.9725	98.2502	5.009e+07	50.09	94.209	0.9	0.872	0.239373	1.25	3.27083e+10	10.5147	-1.51218	53.3944	1.7275	17655.9	1.76559	0.246891	84.6418	1.92758	0.899
Uruguay	2010	59	4	0.0750153	100	9665529	0.565502	95.1895	0.824986	0.976	0.918	1	15.1515	84.1066	98.9725	98.4126	4.495e+07	44.95	94.414	1	0.889	0.25613	1.2977	4.19504e+10	10.6227	-2.34878	51.699	1.71348	18292.5	1.82925	0.262272	82.4649	1.91627	0.914
Uruguay	2011	59	4	0.0644729	100	81991905	0.55766	95.4845	0.957097	0.975	0.918	1	12.1212	85.4431	98.9725	98.5689	1.771e+07	17.71	94.612	1.11	0.886	0.248142	1.28998	5.03424e+10	10.7019	-2.5109	53.247	1.7263	17861.4	1.78614	0.251915	82.9962	1.91906	0.914
Uruguay	2012	59	4	0.0550944	100	6842276	0.552297	95.7752	0.709168	0.975	0.918	1	12.1212	86.7796	98.9725	98.7111	1.81e+07	18.1	94.739	1.22	0.884	0.257452	1.37812	5.42323e+10	10.7343	-2.24023	55.0612	1.74085	17839.8	1.78398	0.25139	81.345	1.91033	0.914
Uruguay	2013	59	4	0.0462346	100	55353475	0.547653	96.0642	0.804738	0.973	0.918	1	12.1212	88.1161	98.9725	98.8476	3.728e+07	37.28	94.843	1.26422	0.884	0.297452	1.39723	6.13376e+10	10.7877	-3.04514	49.7178	1.69651	18592.7	1.85927	0.269343	81.9718	1.91366	0.911
Uruguay	2014	59	4	0.0376732	100	4258479	0.54292	96.3525	0.99188	0.973	0.918	1	13.1313	89.4525	98.9725	98.9812	9.321e+07	93.21	94.945	1.04239	0.904	0.328187	1.38809	6.14962e+10	10.7888	-2.24727	49.0876	1.69097	19071.3	1.90713	0.28038	82.7054	1.91753	0.91
Uruguay	2015	59	4	0.029402	100	3010936	0.538105	96.6401	0.994889	0.973	0.907	1	16.1616	90.789	98.9725	98.9812	2.635e+07	26.35	95.045	2	0.905	0.347484	1.3004	5.76803e+10	10.761	-0.7747	45.3282	1.65637	19596.4	1.95964	0.292176	82.6625	1.91731	0.899
Uruguay	2016	59	4	0.0214097	100	17917044	0.533168	96.9272	1.04852	0.973	0.907	1	16.1616	92.1255	98.9725	98.9812	2.055e+07	20.55	95.144	2.2	0.901	0.333941	1.24706	5.74808e+10	10.7595	1.82341	48.4705	1.68548	19814.3	1.98143	0.296978	81.5067	1.91119	0.899
Uruguay	2017	59	4	0.0136956	100	6003411	0.5282	97.2136	1.04009	0.972	0.893	1	20.202	93.462	98.9725	98.9812	4.716e+07	47.16	95.24	2.66075	0.899	0.270549	1.25342	6.5006e+10	10.813	2.03734	46.378	1.66631	19084.2	1.90842	0.280675	81.2644	1.9099	0.894
Uruguay	2018	59	4	0.0175526	100	1.19602e+07	0.521402	97.4994	1.02415	0.974	0.906	1	20.202	94.7984	98.9725	98.9812	3.3855e+07	33.855	95.334	4	0.906	0.179744	1.20765	6.53446e+10	10.8152	0.729237	47.7914	1.67935	19538.7	1.95387	0.290896	81.081	1.90892	0.9
Uruguay	2019	59	4	0.0156241	100	0.0898337	0.512761	97.7846	1.0283	0.972	0.905	1	19.1919	95.3008	98.9725	98.9812	4.05075e+07	40.5075	95.426	6.1	0.91	0.0786838	1.1954	6.22223e+10	10.7939	-1.36243	49.7449	1.69675	19985	1.9985	0.300704	80.7182	1.90697	0.899
Uruguay	2020	59	4	0.0165884	100	0.0876994	0.504242	98.0693	1.05496	0.946	0.896	1	21.2121	95.3008	98.9725	98.9812	3.71812e+07	37.1812	95.515	9.17302	0.905	0.0518527	1.36467	5.36686e+10	10.7297	-1.09383	46.6861	1.66919	17631.4	1.76314	0.246288	80.3531	1.905	0.87
Uruguay	2021	59	4	0.0161062	100	0.0887665	0.495759	98.3535	1.04597	0.911	0.905	1	24.2424	95.3008	98.9725	98.9812	3.88444e+07	38.8444	95.603	10.1846	0.891	-0.0668956	1.58596	6.07608e+10	10.7836	-2.54575	56.8237	1.75453	18316.9	1.83169	0.262853	80.5357	1.90599	0.859
Uruguay	2022	59	4	0.0163473	100	0.088233	0.492022	98.6365	1.08583	0.869	0.89	1	25.2525	95.3008	98.9725	98.9812	3.80128e+07	38.0128	95.688	11.275	0.892	-0.170369	1.6105	7.01647e+10	10.8461	-2.77709	58.8336	1.76963	17974.2	1.79742	0.254649	80.4444	1.9055	0.824
viet nam	2000	60	4	8.82579	97.5786	630647	0.963889	49.1489	0.408774	0.151	0.047	1	26	76.1045	94.7462	80.6482	1.7844e+09	1784.4	24.374	0.254248	0.696	1.12951	-0.584863	3.11725e+10	10.4938	-1.298	111.417	2.04695	2710.71	0.271071	-0.566917	28.2261	1.45065	0.151
viet nam	2001	60	7	8.31054	97.9543	308304	0.942602	51.1127	0.381227	0.151	0.047	1	26	77.0196	94.9131	81.4817	1.84166e+09	1841.66	24.937	1.26565	0.697	1.05124	-0.525932	3.26852e+10	10.5144	-1.3	111.956	2.04905	3032.47	0.303247	-0.518204	30.4831	1.48406	0.151
viet nam	2002	60	7	7.7999	97.638	98829	0.920659	53.0643	0.353681	0.151	0.05	1	26	77.9354	95.08	82.3092	1.5332e+09	1533.2	25.511	1.855	0.698	1.02445	-0.560991	3.50641e+10	10.5449	-1.4	116.697	2.06706	3283.08	0.328308	-0.483718	30.446	1.48353	0.149
viet nam	2003	60	7	7.29435	97.6952	671055	0.89806	55.002	0.126424	0.151	0.052	1	27.3092	78.8519	95.2471	83.1297	1.95121e+09	1951.21	26.092	3.78028	0.698	0.999848	-0.490873	3.95525e+10	10.5972	-1.45	124.328	2.09457	3502	0.3502	-0.455683	30.7576	1.48795	0.147
viet nam	2004	60	7	6.79377	97.7506	356408	0.874822	56.9263	0.150154	0.159	0.052	1	27.3092	79.7691	95.4142	83.9437	1.90452e+09	1904.52	26.683	7.64241	0.7	0.969589	-0.75666	4.54279e+10	10.6573	-1.61	133.016	2.12391	4225.12	0.422512	-0.374161	31.5916	1.49957	0.148
viet nam	2005	60	7	6.29853	97.8044	4468	0.850948	58.9663	0.484038	0.151	0.052	1	27.3092	80.6871	95.5814	84.7504	1.92277e+09	1922.77	27.281	12.7399	0.717	0.928402	-0.729582	5.76333e+10	10.7607	-1.889	130.715	2.11632	4447.7	0.44477	-0.351864	32.1385	1.50703	0.148
viet nam	2006	60	7	5.80859	97.8564	7357783	0.826452	61.0003	0.40512	0.154	0.053	1	27.3092	81.6058	95.7487	85.55	1.92018e+09	1920.18	27.888	17.2546	0.732	1.32258	-0.747617	6.63717e+10	10.822	-2.315	138.314	2.14086	4037.65	0.403765	-0.393871	32.2192	1.50811	0.149
viet nam	2007	60	7	5.32408	98.0608	42978	0.801345	63.0279	0.251872	0.154	0.053	1	25.7606	82.5252	95.9161	86.3421	1.72443e+09	1724.43	28.504	20.7554	0.739	1.7678	-0.630166	7.74144e+10	10.8888	-6.516	154.605	2.18922	4368.38	0.436838	-0.35968	32.1943	1.50778	0.149
viet nam	2008	60	7	4.8452	98.2565	126844	0.775635	65.0482	0.165261	0.154	0.053	1	25.7606	83.4453	96.0836	87.1266	1.7513e+09	1751.3	29.128	23.92	0.739	1.82746	-0.711533	9.91303e+10	10.9962	-9.279	154.317	2.18842	5341.39	0.534139	-0.272345	32.74	1.51508	0.15
viet nam	2009	60	7	4.37196	98.4436	8268948	0.749338	67.0613	0.271776	0.154	0.049	1	25.7606	84.3661	96.2511	87.9033	2.06889e+09	2068.89	29.762	26.55	0.739	1.49649	-0.545064	1.06015e+11	11.0254	-6.9	134.706	2.12939	5408.3	0.54083	-0.266939	32.9068	1.51729	0.149
viet nam	2010	60	7	3.90401	98.6228	5292773	0.722481	69.0697	0.148408	0.154	0.051	1	25.7606	85.2876	96.4188	88.6734	2.7589e+09	2758.9	30.417	30.65	0.749	1.1444	-0.622543	1.47201e+11	11.1679	-7.1	113.978	2.05682	6180.29	0.618029	-0.208991	34.3451	1.53586	0.15
viet nam	2011	60	7	3.44218	98.7942	235023	0.695056	71.0691	0.189088	0.154	0.05	1	24.4	86.2099	96.5865	89.435	3.07941e+09	3079.41	31.08	35.07	0.747	1.15183	-0.61473	1.72595e+11	11.237	-6.48	125.261	2.09781	6758.89	0.675889	-0.170125	34.3733	1.53622	0.149
viet nam	2012	60	7	2.98657	98.9584	9441333	0.667076	73.0593	0.267359	0.154	0.049	1	24.4	87.1329	96.7543	90.1879	3.79827e+09	3798.27	31.752	36.8	0.749	1.17099	-0.532106	1.95591e+11	11.2913	-7.168	123.224	2.0907	6990.85	0.699085	-0.15547	34.4331	1.53698	0.148
viet nam	2013	60	7	2.53742	99.1156	6569347	0.638548	75.0388	0.250577	0.149	0.048	1	24.4	88.0566	96.9223	90.9316	4.05758e+09	4057.58	32.429	38.5	0.745	1.1803	-0.482919	2.13709e+11	11.3298	-6.944	130.846	2.11676	7305.42	0.730542	-0.136355	34.6727	1.53999	0.146
viet nam	2014	60	7	2.09471	99.2607	373239	0.609492	77.0083	-0.0223474	0.149	0.049	1	24.2972	88.981	97.0903	91.6664	4.2531e+09	4253.1	33.115	41	0.744	1.21423	-0.438488	2.33451e+11	11.3682	-8.05	135.411	2.13165	7980.97	0.798097	-0.0979443	34.6991	1.54032	0.146
viet nam	2015	60	7	1.65859	99.4002	93184	0.579919	78.9669	0.0638082	0.149	0.05	1	24.2972	89.9062	97.2584	92.3919	3.57122e+09	3571.22	33.809	45	0.744	1.23975	-0.45795	2.39258e+11	11.3789	-10.7	144.914	2.16111	8997.65	0.899765	-0.045871	38.7634	1.58842	0.146
viet nam	2016	60	7	1.22919	99.5365	8168855	0.549841	80.9141	0.226833	0.149	0.046	1	26.7206	90.832	97.4265	93.1078	3.1476e+09	3147.6	34.51	53	0.749	1.25988	-0.490106	2.57096e+11	11.4101	-11.6	145.41	2.16259	9659.21	0.965921	-0.0150584	38.8408	1.58929	0.15
viet nam	2017	60	7	0.806681	99.6695	5446463	0.519265	82.8486	0.211102	0.155	0.044	1	26.7206	91.7586	97.5948	93.8137	2.59506e+09	2595.06	35.213	58.14	0.75	1.2442	-0.628588	2.81354e+11	11.4493	-13.62	160.98	2.20677	10293.7	1.02937	0.0125696	38.828	1.58914	0.152
viet nam	2018	60	7	0.395376	99.7994	272134	0.163706	84.7703	0.033083	0.137	0.044	1	26.7206	93.1021	97.9204	94.8328	1.74415e+09	1744.15	35.919	69.8479	0.739	1.10791	-0.511843	3.10106e+11	11.4915	-14.902	164.664	2.2166	11443.5	1.14435	0.0585571	38.7345	1.5881	0.163
viet nam	2019	60	7	0.0205042	99.9263	9742029	0.0162393	86.679	0.0399874	0.13	0.044	1	26.7206	94.0106	98.4435	95.6343	1.17677e+09	1176.77	36.628	68.6616	0.746	0.968367	-0.546221	3.34365e+11	11.5242	-15.635	164.704	2.2167	12585.6	1.25856	0.0998729	39.5241	1.59686	0.212
viet nam	2020	60	7	0.20794	100	3329775	0.0899725	88.5744	-0.0389891	0.129	0.044	1	26.7206	94.905	98.6254	96.2942	1.24033e+09	1240.33	37.34	70.3	0.699	0.927434	-0.374517	3.46616e+11	11.5398	-15.42	163.246	2.21284	12467.4	1.24674	0.0957772	39.4348	1.59588	0.211
viet nam	2021	60	7	0.114222	100	6824865	0.0531059	90.456	-0.117782	0.15	0.042	1	30.2605	95.7993	98.763	96.9271	5.2652e+08	526.52	38.052	74.21	0.709	0.868884	-0.308163	3.66475e+11	11.564	-15.341	186.676	2.27109	12375.9	1.23759	0.0925772	39.4794	1.59637	0.17
viet nam	2022	60	7	0.161081	100	431833	0.0715392	92.3237	-0.0461321	0.161	0.025	1	30.2605	96.6937	98.9007	97.5493	1.945e+07	19.45	38.766	78.59	0.72	0.750757	-0.287254	4.10324e+11	11.6131	-15.226	183.79	2.26432	12983	1.2983	0.113376	39.4571	1.59613	0.154
Philippines	2000	61	7	2.95888	43.7603	888562	3.0041	64.578	-1.39048	0.88	0.756	1	11.2613	80.3013	93.7698	86.515	7.1235e+08	712.35	46.135	1.98225	0.822	2.37927	-0.527594	8.36698e+10	10.9226	-2.115	85.1534	1.9302	3945.09	0.394509	-0.403943	37.6765	1.57607	0.586
Philippines	2001	61	7	2.78867	44.8534	6752176	3.02007	65.0101	-1.12462	0.868	0.749	1	17.757	80.8528	93.9131	86.8671	7.593e+08	759.3	46.05	2.52401	0.837	2.20605	-0.586952	7.89212e+10	10.8972	-0.335	84.9004	1.92891	3776.74	0.377674	-0.422882	37.5088	1.57413	0.547
Philippines	2002	61	7	2.61807	45.9525	4615183	3.01448	65.4431	-0.858753	0.868	0.751	1	14.5091	81.4064	94.1005	87.2412	7.3978e+08	739.78	45.965	4.33228	0.837	2.02767	-0.538532	8.43073e+10	10.9259	-1.477	83.8448	1.92348	3717.37	0.371737	-0.429765	37.3445	1.57223	0.535
Philippines	2003	61	7	2.44707	47.0572	247465	3.00895	65.8769	-1.55981	0.863	0.751	1	17.757	81.96	94.288	87.6161	8.2921e+08	829.21	45.88	4.85767	0.837	1.98211	-0.635372	8.70391e+10	10.9397	-0.188	87.5746	1.94238	3758.51	0.375851	-0.424984	37.6966	1.5763	0.533
Philippines	2004	61	7	2.27567	48.1673	330596	3.00348	66.3114	-1.70588	0.856	0.733	1	15.2542	82.5135	94.4757	87.9916	5.484e+08	548.4	45.795	5.24363	0.827	1.94327	-0.707702	9.5002e+10	10.9777	-0.109	87.1253	1.94014	3771.8	0.37718	-0.423452	38.468	1.5851	0.495
Philippines	2005	61	7	2.10387	49.2818	8183007	2.99807	66.7469	-1.17879	0.835	0.732	1	15.2542	83.0672	94.6635	88.3678	6.7599e+08	675.99	45.71	5.39764	0.827	1.85941	-0.662844	1.0742e+11	11.0311	-0.869883	83.8457	1.92348	3713.32	0.371332	-0.430237	38.0823	1.58072	0.472
Philippines	2006	61	7	1.93167	50.4002	60319	2.99273	67.1831	-1.63867	0.834	0.732	1	15.2542	83.6208	94.8514	88.7448	6.9431e+08	694.31	45.625	5.74059	0.826	1.68208	-0.889427	1.27653e+11	11.106	-1.6391	80.8505	1.90768	3471.66	0.347166	-0.459462	38.8369	1.58924	0.473
Philippines	2007	61	7	1.75907	51.5228	387731	2.98745	68.2064	-1.60489	0.834	0.739	1	20.5021	84.1745	95.0394	89.1224	7.1331e+08	713.31	45.54	5.97	0.836	1.73463	-0.778005	1.5598e+11	11.1931	2.45394	73.645	1.86714	3535.24	0.353524	-0.451582	39.5412	1.59705	0.471
Philippines	2008	61	7	1.58606	52.6485	1719127	2.98223	69.2399	-1.77924	0.834	0.743	1	20.5021	84.7282	95.2276	89.5007	1.3937e+08	139.37	45.455	6.22	0.836	1.76733	-0.778095	1.81625e+11	11.2592	0.630007	67.6811	1.83047	3587.58	0.358758	-0.445198	40.279	1.60508	0.47
Philippines	2009	61	7	1.4118	76.2499	9556794	2.97706	70.2837	-1.72876	0.835	0.743	1	20.5021	85.2819	95.4159	89.8798	4.1527e+08	415.27	45.371	9	0.837	1.80155	-0.786739	1.75975e+11	11.2455	-0.167491	60.8866	1.78452	3563.59	0.356359	-0.448112	40.5809	1.60832	0.47
Philippines	2010	61	7	1.23361	77.802	7361665	2.97124	71.3424	-1.65076	0.869	0.776	1	22.1429	85.8357	95.6044	90.264	6.4296e+08	642.96	45.332	25	0.847	2.04795	-0.781124	2.08369e+11	11.3188	1.64178	66.1043	1.82023	3601.58	0.360158	-0.443507	40.5809	1.60832	0.527
Philippines	2011	61	7	1.05631	79.326	5020328	2.96161	72.4332	-1.39218	0.876	0.776	1	22.8873	86.3894	95.793	90.6701	1.038e+07	10.38	45.522	29	0.848	1.96474	-0.685035	2.34217e+11	11.3696	0.34249	60.7958	1.78387	3608.63	0.360863	-0.442658	41.1175	1.61403	0.549
Philippines	2012	61	7	0.879883	80.7378	2686896	2.95163	73.5302	-1.18824	0.876	0.776	1	22.8873	86.9432	95.9817	91.0749	1.0254e+08	102.54	45.712	30.8	0.848	1.94226	-0.573895	2.61921e+11	11.4182	0.957805	57.842	1.76224	3668.37	0.366837	-0.435527	41.6876	1.62001	0.549
Philippines	2013	61	7	0.704365	82.1179	36074	2.9413	74.6335	-1.08425	0.879	0.785	1	27.3356	87.4971	96.1705	91.4785	2.2751e+08	227.51	45.903	32.7	0.836	1.87972	-0.380066	2.83903e+11	11.4532	-0.0904224	55.8248	1.74683	3865.76	0.386576	-0.412765	41.8184	1.62137	0.549
Philippines	2014	61	7	0.529731	83.4838	804303	2.93066	75.7429	-0.713821	0.879	0.79	1	27.3356	88.0509	96.3595	91.8806	7.0091e+08	700.91	46.093	34.7	0.836	1.64283	-0.439755	2.97484e+11	11.4735	1.01435	57.4682	1.75943	4002.74	0.400274	-0.397642	41.9157	1.62238	0.549
Philippines	2015	61	7	0.355994	84.835	5732713	2.91965	76.8583	-0.854724	0.879	0.79	1	27.2414	88.6048	96.5486	92.2815	5.8564e+08	585.64	46.284	36.9	0.847	1.47875	-0.481131	3.06446e+11	11.4864	-0.0996506	59.1416	1.77189	4314.06	0.431406	-0.365113	42.0129	1.62338	0.551
Philippines	2016	61	7	0.183115	86.1716	343026	2.9083	77.9797	-1.37869	0.762	0.767	1	29.7945	89.1587	96.7379	92.6812	3.5063e+08	350.63	46.475	39.2	0.844	1.34191	-0.519235	3.18627e+11	11.5033	-5.88281	61.7761	1.79082	4629.12	0.462912	-0.334502	42.1102	1.62439	0.518
Philippines	2017	61	7	0.011208	87.494	112763	2.89627	79.1078	-1.18929	0.746	0.741	1	29.4521	89.7127	96.9273	93.0806	1.8738e+08	187.38	46.682	41.6	0.808	1.2883	-0.507542	3.28481e+11	11.5165	-6.95171	68.1684	1.83358	4989.89	0.498989	-0.301909	42.2075	1.62539	0.505
Philippines	2018	61	7	0.0971616	88.802	8824813	2.88348	80.2422	-1.0962	0.704	0.714	1	29.4521	90.2666	97.1168	93.4798	5.7969e+08	579.69	46.907	44.1	0.808	1.23686	-0.576294	3.46842e+11	11.5401	-5.8329	72.1634	1.85832	5040.64	0.504064	-0.297514	42.3047	1.62639	0.483
Philippines	2019	61	7	0.0541848	90.0955	4927373	2.86991	81.3825	-0.928061	0.654	0.692	1	27.9605	90.8206	97.3065	93.8786	9.1781e+08	917.81	47.149	43.0266	0.797	1.21616	-0.606207	3.76823e+11	11.5761	-5.32043	68.8418	1.83785	5104.39	0.510439	-0.292056	42.402	1.62739	0.451
Philippines	2020	61	7	0.0756732	91.3747	932493	2.85552	82.5281	-0.778704	0.586	0.681	1	27.9605	91.3747	97.4963	94.2768	1.48392e+09	1483.92	47.408	53.7649	0.798	1.14551	-0.510658	3.61751e+11	11.5584	-3.2601	58.1696	1.7647	4565.34	0.456534	-0.340527	42.5093	1.62848	0.426
Philippines	2021	61	7	0.064929	92.6398	695447	2.84027	83.6784	-0.984022	0.615	0.681	1	27.9605	91.9287	97.6862	94.6741	1.63386e+09	1633.86	47.684	63.4019	0.792	0.90566	-0.530111	3.94087e+11	11.5956	-9.73224	63.4846	1.80267	4791.94	0.479194	-0.319489	42.4556	1.62794	0.43
Philippines	2022	61	7	4.14217	93.0587	299559	2.82413	84.833	-0.655269	0.657	0.684	1	27.3312	92.4828	97.8763	95.0704	1.84077e+09	1840.77	47.977	75.2111	0.806	0.760479	-0.541212	4.04353e+11	11.6068	-5.63095	72.4297	1.85992	5066.79	0.506679	-0.295267	42.4825	1.62821	0.426
Panama	2000	62	4	4.14217	93.0587	302529	0.073842	62.5613	0.251224	0.858	0.851	1	9.85915	77.2305	97.1502	89.6202	4.518e+07	45.18	62.198	6.5548	0.755	1.96401	-0.319528	11966497000	10.078	-0.6239	139.198	2.14363	22343	2.2343	0.349141	29.9973	1.47708	0.728
Panama	2001	62	4	3.99344	93.2857	892367	0.0562974	63.3	0.298576	0.858	0.865	1	9.85915	77.7804	97.2943	89.976	5.752e+07	57.52	62.497	7.2684	0.755	1.94641	-0.365398	12252906300	10.0882	-0.4671	135.584	2.13221	22268.6	2.22686	0.347693	30.1372	1.4791	0.734
Panama	2002	62	4	3.84661	93.5116	8766775	0.0913866	64.3589	0.345928	0.858	0.865	1	9.85915	78.3303	97.4383	90.329	4.501e+07	45.01	62.794	8.51808	0.755	1.92967	-0.335231	12800851300	10.1072	-0.0986	126.024	2.10045	21577.7	2.15777	0.334005	30.1022	1.4786	0.734
Panama	2003	62	4	3.70148	93.7364	664663	0.0212082	65.4227	0.0732295	0.858	0.865	1	9.85915	78.8228	97.5824	90.6584	4.786e+07	47.86	63.091	9.98742	0.755	1.9137	-0.395565	13603456000	10.1336	-0.8175	117.267	2.06918	21345.7	2.13457	0.32931	30.0673	1.47809	0.734
Panama	2004	62	4	3.55814	93.9602	4532847	0.161565	66.4913	0.0841384	0.858	0.865	1	16.6667	79.1837	97.6139	90.866	3.792e+07	37.92	63.387	11.1409	0.799	1.90499	-0.300812	15100203400	10.179	-1.0191	124.762	2.09608	21352.9	2.13529	0.329456	30.0323	1.47759	0.736
Panama	2005	62	4	3.41659	94.1836	2425404	0.310195	67.5645	-0.157523	0.858	0.865	1	16.6667	79.542	97.6331	91.0628	3.479e+07	34.79	63.682	11.484	0.799	1.88517	-0.390578	16623906700	10.2207	-0.9176	139.211	2.14367	20928.8	2.09288	0.320744	29.9973	1.47708	0.737
Panama	2006	62	4	3.27681	94.4067	324283	0.459619	68.6425	-0.067905	0.858	0.865	1	16.6667	79.8977	97.6521	91.2562	4.912e+07	49.12	63.976	17.3496	0.799	1.85405	-0.363585	18659721500	10.2709	-2.5473	141.473	2.15067	22302.5	2.23025	0.348354	29.922	1.47599	0.737
Panama	2007	62	4	3.13889	94.6292	8230276	0.609822	69.7248	-0.0613481	0.858	0.865	1	16.6667	80.2507	97.6706	91.4461	-1.0982e+08	-109.82	64.268	22.29	0.799	1.83391	-0.339886	21717433800	10.3368	-1.8986	148.666	2.17221	20661.1	2.06611	0.315154	30.0215	1.47743	0.737
Panama	2008	62	4	3.00263	94.851	6141663	0.760783	70.8121	-0.0977801	0.858	0.865	1	16.6667	80.6012	97.6888	91.6329	3.816e+07	38.16	64.56	33.82	0.799	1.82065	-0.101286	25721328000	10.4103	-2.1467	164.586	2.21639	23762.4	2.37624	0.375891	29.9865	1.47693	0.737
Panama	2009	62	4	2.86813	95.072	4059267	0.912487	71.9041	0.0622795	0.833	0.863	1	16.6667	80.949	97.7066	91.8165	6.586e+07	65.86	64.851	39.08	0.759	1.80423	-0.327104	27791215500	10.4439	-1.2593	137.046	2.13687	22608.2	2.26082	0.354266	30.0188	1.47739	0.745
Panama	2010	62	4	2.73544	99.3565	198388	1.06492	73.0005	-0.116048	0.825	0.864	1	8.4507	81.2942	97.7241	91.9966	1.1336e+08	113.36	65.14	40.1	0.759	1.78386	-0.358153	30231009500	10.4805	-2.4065	145.449	2.16271	25191.7	2.51917	0.401257	30.4868	1.48411	0.748
Panama	2011	62	4	2.60383	99.3626	9907322	1.21801	74.1042	-0.0282189	0.825	0.864	1	8.4507	81.6369	97.7412	92.175	9.658e+07	96.58	65.437	42.7	0.759	1.77469	-0.354333	35687738300	10.5525	-2.977	158.208	2.19923	24962.4	2.49624	0.397286	30.4412	1.48346	0.748
Panama	2012	62	4	2.47342	99.3689	7830532	1.37173	75.2147	-0.179433	0.825	0.864	1	8.4507	81.9769	97.7579	92.3515	5.164e+07	51.64	65.741	40.3019	0.759	1.76452	-0.39512	41595439700	10.619	-3.4849	153.209	2.18528	27223.3	2.72233	0.43494	30.3067	1.48154	0.748
Panama	2013	62	4	2.34428	99.3753	575369	1.52602	76.3321	-0.141261	0.824	0.87	1	8.4507	82.3143	97.7742	92.5259	1.046e+07	10.46	66.052	44.03	0.763	1.74234	-0.381226	46949496500	10.6716	-3.2363	133.072	2.12409	26325.1	2.63251	0.420369	30.1722	1.47961	0.756
Panama	2014	62	4	2.2164	99.3906	3676348	1.68086	77.4566	0.209008	0.826	0.87	1	19.2982	82.649	97.7902	92.6984	-1.9046e+08	-190.46	66.371	44.9238	0.802	1.73046	-0.370015	51427104900	10.7112	-4.1296	114.971	2.06059	26454.4	2.64544	0.422498	30.1268	1.47895	0.747
Panama	2015	62	4	2.08997	99.4052	1600137	1.83621	78.5877	0.377415	0.844	0.881	1	18.3099	82.9812	97.8058	92.8686	1.167e+07	11.67	66.696	51.2054	0.802	1.73037	-0.434962	55767806100	10.7464	-3.9721	96.5792	1.98488	28399.3	2.83993	0.453308	29.9919	1.477	0.755
Panama	2016	62	4	1.96506	99.4192	9525273	1.83978	79.7252	0.400728	0.844	0.881	1	18.3099	83.5151	97.9477	93.1888	2.731e+07	27.31	67.027	54	0.802	1.72867	-0.573966	59760858700	10.7764	-4.55723	84.396	1.92632	29494.6	2.94946	0.469742	29.857	1.47505	0.755
Panama	2017	62	4	1.84164	99.4327	7451198	1.84318	80.8694	0.380334	0.809	0.881	1	18.3099	84.0489	98.0896	93.5074	4.726e+07	47.26	67.365	59.9506	0.793	1.7132	-0.613697	64327688800	10.8084	-4.42022	84.0475	1.92452	31180.1	3.11801	0.493877	29.7221	1.47308	0.74
Panama	2018	62	4	1.71985	99.4455	537881	1.84644	82.0201	0.252162	0.803	0.874	1	18.3099	84.5827	98.2314	93.8241	4.219e+07	42.19	67.709	61.8055	0.793	1.67312	-0.610338	67316471200	10.8281	-4.57017	86.131	1.93516	31255.3	3.12553	0.494924	29.5632	1.47075	0.733
Panama	2019	62	4	1.60307	99.4578	3654687	1.84896	83.1771	0.290946	0.801	0.873	1	21.1268	85.1166	98.3733	94.139	7.789e+07	77.89	68.059	63.6284	0.8	1.59098	-0.643827	69778991200	10.8437	-3.30289	80.4287	1.90541	27875.5	2.78755	0.445223	29.4284	1.46877	0.735
Panama	2020	62	4	1.49167	99.4696	2623014	1.85024	84.3402	0.235503	0.79	0.875	1	22.5352	85.6504	98.4844	94.4306	1.5289e+08	152.89	68.414	72.61	0.797	1.37341	-0.584162	57059846500	10.7563	-0.0780903	68.7004	1.83696	27640.8	2.76408	0.441551	29.3084	1.46699	0.735
Panama	2021	62	4	1.38211	99.4808	1604517	1.85134	85.5097	0.307207	0.803	0.875	1	22.5352	86.1843	98.4844	94.6437	9.14e+07	91.4	68.775	73.0556	0.801	1.20724	-0.591641	67396392500	10.8286	-1.3614	80.1335	1.90381	27067.1	2.70671	0.432441	29.3684	1.46788	0.744
Panama	2022	62	4	1.36591	99.4914	1351287	1.8474	86.6852	0.289221	0.791	0.871	1	22.5352	86.7181	98.4844	94.8534	1.4563e+08	145.63	69.141	73.6085	0.811	1.26612	-0.634862	76276116700	10.8824	-2.87179	93.6872	1.97168	27354	2.7354	0.43702	29.3384	1.46744	0.732
iles maurice	2000	63	1	0.1637	61.7932	51996243	1.8474	90.5194	0.754748	0.848	0.897	1	5.71429	99	99	99	3.43e+07	34.3	42.67	7.28154	0.709	0.982676	0.198928	4.72611e+09	9.6745	-0.252689	120.688	2.08166	13215.6	1.32156	0.121087	71.4669	1.85411	0.227
iles maurice	2001	63	1	0.155875	63.1539	49455443	0.459619	90.8011	0.935701	0.848	0.897	1	5.71429	99	99	99	3.507e+07	35.07	42.559	8.7809	0.709	0.790048	0.260831	4.67576e+09	9.66985	0.0305436	128.055	2.1074	13385.3	1.33853	0.126628	72.5416	1.86059	0.227
iles maurice	2002	63	1	0.148021	64.5004	46909618	1.15351	91.0832	1.11665	0.855	0.897	1	5.71429	99	99	99	3.935e+07	39.35	42.447	10.2526	0.709	0.69424	0.328717	4.90649e+09	9.69077	-0.0233753	118.23	2.07273	13056.5	1.30565	0.115826	72.5416	1.86059	0.327
iles maurice	2003	63	1	0.140134	65.8325	44358802	0.806564	91.3657	1.00941	0.855	0.897	1	5.71429	99	99	99	-1.955e+07	-19.55	42.335	12.1871	0.709	0.723662	0.192946	5.89487e+09	9.77047	-0.0686483	108.656	2.03605	13249.9	1.32499	0.122211	72.5416	1.86059	0.386
iles maurice	2004	63	1	0.132216	67.1487	41802272	0.980037	91.6486	0.974533	0.855	0.897	1	5.71429	99	99	99	3.976e+07	39.76	42.223	13.6891	0.72	0.627104	0.152765	6.66742e+09	9.82396	0.0178918	107.028	2.0295	13567.3	1.35673	0.132493	72.5416	1.86059	0.423
iles maurice	2005	63	1	0.124264	68.4493	392402	0.8933	91.9321	1.02775	0.855	0.897	1	17.1429	99	99	99	3.816e+07	38.16	42.112	15.1722	0.777	0.5921	0.219138	6.57611e+09	9.81797	0.00518736	121.609	2.08496	14451.1	1.44511	0.159901	71.4669	1.85411	0.447
iles maurice	2006	63	1	0.116282	69.7341	36673558	0.936668	92.216	0.78089	0.856	0.897	1	17.1429	99	99	99	2.164e+07	21.64	42	16.7	0.772	0.466404	0.273244	7.02881e+09	9.84688	-0.0971674	127.063	2.10402	15004.6	1.50046	0.176225	71.4669	1.85411	0.452
iles maurice	2007	63	1	0.108267	71.0033	3410165	0.914984	92.5003	0.879288	0.856	0.897	1	17.1429	99	99	99	7.139e+07	71.39	41.889	20.22	0.772	0.455526	0.350999	8.15015e+09	9.91117	-0.281189	120.876	2.08234	15502.1	1.55021	0.190391	71.4669	1.85411	0.458
iles maurice	2008	63	1	0.100221	72.2543	31524202	0.925826	92.7851	0.890551	0.856	0.897	1	17.1429	99	99	99	1.0539e+08	105.39	41.777	21.81	0.772	0.361631	0.440311	9.99036e+09	9.99958	-0.325298	115.489	2.06254	15889.5	1.58895	0.201109	71.4669	1.85411	0.458
iles maurice	2009	63	1	0.0921424	73.4888	28941354	0.920405	93.0704	0.707767	0.856	0.897	1	17.1429	99	99	99	1.573e+08	157.3	41.666	22.51	0.772	0.265538	0.465923	9.12884e+09	9.96042	-0.218842	104.43	2.01882	15279	1.5279	0.184095	71.4669	1.85411	0.458
iles maurice	2010	63	1	0.0840318	74.7061	26353663	0.923116	93.3561	0.640259	0.883	0.897	1	18.8406	99	99	99	1.2864e+08	128.64	41.555	28.33	0.813	0.237887	0.48235	1.00037e+10	10.0002	-13.8433	113.457	2.05483	16415.4	1.64154	0.215252	71.4669	1.85411	0.445
iles maurice	2011	63	1	0.0758895	75.9058	23761007	0.921761	93.6423	0.946499	0.89	0.897	1	18.8406	99	99	99	1.7996e+08	179.96	41.444	34.95	0.813	0.16014	0.463921	1.15184e+10	10.0614	0.988795	117.539	2.07018	16788.4	1.67884	0.225009	71.4669	1.85411	0.48
iles maurice	2012	63	1	0.0677167	77.0867	2116267	0.922438	93.929	0.971312	0.89	0.897	1	18.8406	99	99	99	1.8164e+08	181.64	41.332	35.42	0.814	0.277321	0.252168	1.16687e+10	10.067	-5.67016	119.5	2.07737	16868.9	1.68689	0.227086	71.4669	1.85411	0.48
iles maurice	2013	63	1	0.0595101	78.2458	18559101	0.922099	94.2161	0.944802	0.87	0.894	1	18.8406	99	99	99	1.4407e+08	144.07	41.222	40.1168	0.84	0.242166	0.25194	1.2293e+10	10.0897	-1.2038	113.309	2.05426	17104.6	1.71046	0.233114	71.4669	1.85411	0.506
iles maurice	2014	63	1	0.051273	79.3826	15949965	0.922269	94.5037	0.667966	0.857	0.884	1	18.8406	99	99	99	4.197e+07	41.97	41.111	44.8033	0.815	0.181022	0.31774	1.30741e+10	10.1164	-20.369	110.59	2.04371	17609.4	1.76094	0.245745	71.4669	1.85411	0.506
iles maurice	2015	63	1	0.0430042	80.4967	13336246	0.922184	94.7917	0.988632	0.865	0.881	1	11.5942	99	99	99	90500000	90.5	41	50.1393	0.828	0.132404	0.223563	1.20073e+10	10.0794	-4.5069	107.146	2.02998	18247.5	1.82475	0.261204	71.4669	1.85411	0.419
iles maurice	2016	63	1	0.0346934	81.5893	107148476	0.922227	95.0807	0.999218	0.864	0.878	1	11.5942	99	99	99	4.874e+07	48.74	40.91	52.1913	0.828	0.0687082	0.106664	1.25942e+10	10.1002	-8.08569	101.366	2.00589	18958.6	1.89586	0.277806	70.9296	1.85083	0.407
iles maurice	2017	63	1	0.0263497	82.6596	8087215	0.922205	95.3705	0.962366	0.858	0.878	1	11.5942	99	99	99	1.628e+07	16.28	40.841	55.4032	0.815	0.0901673	0.156348	1.37135e+10	10.1371	-25.1052	101.25	2.0054	20786.8	2.07868	0.317787	70.3923	1.84752	0.397
iles maurice	2018	63	1	0.017982	83.7084	54554805	0.922216	95.661	0.859585	0.871	0.878	1	11.5942	99	99	99	7.327e+07	73.27	40.793	58.5962	0.826	0.0545355	0.186286	1.47357e+10	10.1684	-1.45599	98.0872	1.99161	21929.6	2.19296	0.341031	70.3923	1.84752	0.379
iles maurice	2019	63	1	0.00959936	84.7356	28201923	0.922211	95.9524	0.802008	0.855	0.876	1	20	99	99	99	2.428e+07	24.28	40.766	61.73	0.854	0.0322331	0.210404	1.44363e+10	10.1595	-3.54522	96.492	1.98449	22800.2	2.28002	0.357938	70.3923	1.84752	0.32
iles maurice	2020	63	1	0.0137907	85.7417	4199758	0.922213	96.2431	0.873046	0.785	0.842	1	20	99	99	99	3.5164e+08	351.64	40.76	67.7329	0.821	0.00229068	0.441047	1.14081e+10	10.0572	12.7337	85.8305	1.93364	19245.2	1.92452	0.284322	70.3923	1.84752	0.289
iles maurice	2021	63	1	0.011695	86.7268	1.62008e+07	0.922212	96.525	0.832596	0.727	0.842	1	20	99	99	99	2.932e+08	293.2	40.775	71.6	0.794	0.025273	0.442368	1.14843e+10	10.0601	2.4268	98	1.99123	19724.7	1.97247	0.295011	70.3923	1.84752	0.29
iles maurice	2022	63	1	0.0127429	99.3163	0.509053	0.922213	96.8075	0.830024	0.676	0.798	1	20	99	99	99	8.19e+07	81.9	40.81	75.5	0.794	-0.301401	0.420372	1.2928e+10	10.1115	9.33926	118.34	2.07313	19484.9	1.94849	0.289699	70.3923	1.84752	0.282
Sierra léonne	2000	64	1	36.5936	90.7016	726883	6.59525	7.69469	-1.86869	0.708	0.644	1	8.75	26.4913	66.8882	40.8831	2.8495e+08	284.95	35.626	0.118254	0.426	2.4154	-0.736802	6.35866e+08	8.80337	-0.0390008	57.53	1.75989	409.267	0.0409267	-1.38799	38.9305	1.59029	0.23
Sierra léonne	2001	64	1	36.375	91.5612	646154	6.5685	7.92617	-1.28004	0.708	0.644	1	8.75	26.5367	67.4852	41.2237	5.5504e+08	555.04	35.867	0.160264	0.426	5.90552	-0.841121	1.68147e+09	9.22569	-0.00983574	22.9733	1.36122	484.695	0.0484695	-1.31453	41.5838	1.61892	0.23
Sierra léonne	2002	64	1	35.0999	92.4105	741603	6.64093	8.15826	-0.691396	0.771	0.76	1	8.75	27.8161	68.0839	42.3564	5.9595e+08	595.95	36.109	0.176199	0.609	5.7697	-0.789459	1.93386e+09	9.28643	-0.0104134	24.8775	1.39581	460.83	0.046083	-1.33646	44.7503	1.6508	0.3
Sierra léonne	2003	64	1	33.8309	93.2505	834741	6.70943	8.39095	-1.08121	0.777	0.798	1	14.5161	29.0996	68.6845	43.4895	4.5966e+08	459.66	36.352	0.190173	0.69	4.06499	-0.892783	2.14262e+09	9.33094	-0.00861505	29.6907	1.47262	454.77	0.045477	-1.34221	49.4136	1.69385	0.557
Sierra léonne	2004	64	1	32.5679	94.0812	925561	6.774	8.94955	-0.514732	0.778	0.798	1	14.5161	30.3874	69.2868	44.623	4.6156e+08	461.56	36.596	0.203008	0.699	3.38062	-0.881413	2.23735e+09	9.34973	-0.0611533	29.5153	1.47005	438.832	0.0438832	-1.3577	52.2684	1.71824	0.556
Sierra léonne	2005	64	1	31.2812	94.9031	783	6.8409	9.53865	-0.481068	0.778	0.798	1	14.5161	31.6794	69.8909	45.7867	4.0468e+08	404.68	36.919	0.215392	0.699	2.68947	-1.08549	2.54528e+09	9.40573	-0.0907317	30.3949	1.4828	386.952	0.0386952	-1.41234	52.8127	1.72274	0.556
Sierra léonne	2006	64	1	29.9805	95.7164	81978	6.90836	10.1567	-0.302884	0.778	0.798	1	14.5161	32.9756	70.4968	46.9722	4.3227e+08	432.27	37.303	0.227669	0.695	2.20667	-1.02615	2.91299e+09	9.46434	-0.058768	27.1235	1.43335	457.998	0.0457998	-1.33914	55.831	1.74688	0.556
Sierra léonne	2007	64	1	28.6894	96.5217	152391	6.9716	10.7956	-0.0615782	0.778	0.808	1	13.2231	34.276	71.1045	48.1563	5.3634e+08	536.34	37.689	0.239835	0.711	2.19611	-0.91934	3.32685e+09	9.52203	-0.0965778	26.1441	1.41737	423.133	0.0423133	-1.37352	50.2039	1.70074	0.539
Sierra léonne	2008	64	1	27.4078	97.0133	21905	7.03065	11.4555	-0.239809	0.783	0.824	1	13.2231	35.5807	71.714	49.3391	3.3122e+08	331.22	38.077	0.25	0.713	2.49702	-0.978875	3.8356e+09	9.58383	-0.0576237	25.6147	1.40849	405.939	0.0405939	-1.39154	51.4302	1.71122	0.515
Sierra léonne	2009	64	1	26.1362	97.3142	282022	7.08544	12.1362	-0.28903	0.786	0.824	1	13.2231	36.8895	72.3252	50.5202	4.2841e+08	428.41	38.466	0.26	0.713	2.69337	-0.942291	3.78417e+09	9.57797	-0.110846	26.8701	1.42927	396.569	0.0396569	-1.40168	52.6596	1.72148	0.514
Sierra léonne	2010	64	1	24.8747	97.5988	341293	7.136	12.8377	-0.236645	0.786	0.824	1	13.2231	38.2026	72.9382	51.6994	4.889e+08	488.9	38.856	0.58	0.737	2.72151	-0.780792	4.03312e+09	9.60564	-0.238437	32.7773	1.51557	458.273	0.0458273	-1.33888	54.4525	1.73602	0.514
Sierra léonne	2011	64	1	23.623	97.6645	396742	7.18242	13.5602	-0.168445	0.786	0.824	1	12.9032	39.5198	73.553	52.8772	4.2353e+08	423.53	39.248	0.9	0.737	2.60978	-0.860042	4.58708e+09	9.66154	-0.950478	46.2493	1.6651	564.663	0.0564663	-1.24821	55.6613	1.74555	0.514
Sierra léonne	2012	64	1	22.3811	99.3346	44834	7.22474	14.3036	-0.279945	0.754	0.801	1	12.3967	40.8413	74.1696	54.0533	4.5301e+08	453.01	39.642	2.5	0.734	2.53259	-0.9574	5.92768e+09	9.77289	-0.722447	54.663	1.73769	610.724	0.0610724	-1.21415	53.1539	1.72554	0.5
Sierra léonne	2013	64	1	21.1498	99.3328	496292	7.26283	15.0676	-0.174718	0.77	0.785	1	12.3967	42.167	74.7879	55.2271	4.5539e+08	455.39	40.036	4	0.784	2.45726	-0.912266	7.6971e+09	9.88633	-0.429665	55.9039	1.74744	692.696	0.0692696	-1.15946	54.7056	1.73803	0.504
Sierra léonne	2014	64	1	19.9284	99.331	540361	7.29686	15.8526	-0.10404	0.77	0.785	1	12.0968	43.4969	75.4081	56.3992	9.0737e+08	907.37	40.432	6.0573	0.784	2.38906	-0.948586	7.84546e+09	9.89462	-0.37509	53.176	1.72572	743	0.0743	-1.12901	54.7104	1.73807	0.504
Sierra léonne	2015	64	1	18.7173	99.3293	580643	7.32678	16.6583	-0.106273	0.77	0.785	1	12.3967	44.831	76.03	57.5693	1.04267e+09	1042.67	40.829	6.34442	0.784	2.31819	-0.820487	6.65163e+09	9.82293	-0.252436	42.3688	1.62705	592.628	0.0592628	-1.22722	54.7104	1.73807	0.504
Sierra léonne	2016	64	1	17.5163	99.3275	616982	7.35269	17.4849	-0.167113	0.77	0.785	1	12.3967	46.1694	76.6537	58.7374	7.9007e+08	790.07	41.228	11.7732	0.784	2.35457	-0.841479	6.04262e+09	9.78122	-0.138509	48.2965	1.68392	591.517	0.0591517	-1.22803	54.7104	1.73807	0.504
Sierra léonne	2017	64	1	16.3239	99.3257	648422	7.37505	18.3339	-0.0394266	0.805	0.756	1	12.3967	47.5119	77.2791	59.9058	612750000	612.75	41.636	13.2369	0.758	2.38579	-0.590301	5.81848e+09	9.76481	-0.413724	47.6151	1.67775	573.704	0.0573704	-1.24131	54.7104	1.73807	0.503
Sierra léonne	2018	64	1	15.1401	99.3239	674551	7.39398	19.2055	-0.0887954	0.829	0.787	1	12.3288	48.8587	77.9064	61.0747	5.4846e+08	548.46	42.055	15.8	0.789	2.34731	-0.511719	6.39051e+09	9.80554	-0.250446	37.3775	1.57261	568.166	0.0568166	-1.24552	54.7104	1.73807	0.538
Sierra léonne	2019	64	1	13.9654	99.3222	695356	7.40942	20.0997	-0.0569148	0.824	0.789	1	12.3288	50.2097	78.5354	62.2436	6.2046e+08	620.46	42.484	20.8	0.769	2.32146	-0.470782	6.52358e+09	9.81449	-0.3424	37.562	1.57475	513.004	0.0513004	-1.28988	54.7104	1.73807	0.542
Sierra léonne	2020	64	1	12.8004	64.8021	710703	7.42135	21.0167	-0.302385	0.841	0.789	1	12.3288	51.5649	79.1662	63.4122	8.9354e+08	893.54	42.923	27.4681	0.776	2.30847	-0.396056	6.68859e+09	9.82533	-0.172699	30.6118	1.48589	480.527	0.0480527	-1.31828	54.7104	1.73807	0.546
Sierra léonne	2021	64	1	11.6453	65.9027	720457	7.42978	21.9565	-0.0969721	0.846	0.789	1	12.3288	52.9243	79.7988	64.5803	7.0966e+08	709.66	43.372	27.595	0.801	2.27463	-0.455585	7.16521e+09	9.85523	-0.212289	42.1536	1.62483	492.598	0.0492598	-1.30751	54.7104	1.73807	0.547
Sierra léonne	2022	64	1	10.5007	66.9992	724476	7.43471	22.9192	-0.0945132	0.864	0.825	1	12.3288	54.2879	80.4332	65.7477	5.4558e+08	545.58	43.831	30.3518	0.785	2.22598	-0.559889	7.11914e+09	9.85243	-0.293971	45.0668	1.65386	486.562	0.0486562	-1.31286	54.7104	1.73807	0.562
Suriname	2000	65	4	7.63161	100	916871	0.389862	78.0261	0.212451	0.904	0.878	1	17.6471	72.4201	97.4661	89.0617	5.358e+07	53.58	66.444	2.50641	0.837	2.06184	0.454761	9.47672e+08	8.97666	0.0377938	99.2211	1.9966	17458.8	1.74588	0.242015	0.564103	-0.248642	0.783
Suriname	2001	65	4	7.26214	100	788589	0.419489	78.3498	0.352567	0.895	0.878	1	17.6471	73.6389	97.5288	89.5298	4.158e+07	41.58	66.517	3.06445	0.835	2.05924	0.283817	8.34279e+08	8.92131	0.0318125	99.2712	1.99682	16939.6	1.69396	0.228904	0.551282	-0.258626	0.781
Suriname	2002	65	4	6.894	100	6604655	0.4495	78.6725	0.492683	0.895	0.878	1	17.6471	74.8566	97.5916	89.996	2.036e+07	20.36	66.591	4.16157	0.835	2.0326	0.261614	1.09357e+09	9.03885	0.043775	99.1709	1.99638	18476.7	1.84767	0.266624	0.474359	-0.323893	0.781
Suriname	2003	65	4	6.52762	100	5325356	0.479898	78.9936	0.483303	0.895	0.878	1	17.6471	76.0731	97.6543	90.4599	1.518e+07	15.18	66.664	4.71988	0.835	1.96683	0.306021	1.27419e+09	9.10523	0.01985	99.3715	1.99726	16105.4	1.61054	0.206972	0.516026	-0.287329	0.781
Suriname	2004	65	4	6.16278	100	4047916	0.510678	79.3134	0.302263	0.895	0.878	1	19.6078	77.2884	97.7169	90.9218	3.005e+07	30.05	66.737	6.07605	0.84	1.47189	0.262759	1.48409e+09	9.17146	0.0677	98.9704	1.99551	18010.4	1.80104	0.255524	0.496795	-0.303823	0.781
Suriname	2005	65	4	5.82195	100	27904	0.542222	79.9454	0.233045	0.895	0.88	1	25.4902	78.5025	97.7795	91.3568	5.174e+07	51.74	66.682	6.40309	0.851	1.04333	0.21634	1.79341e+09	9.25368	-0.028	99.7726	1.99901	18127.9	1.81279	0.258347	0.466667	-0.330993	0.772
Suriname	2006	65	4	5.48198	100	153272	0.574247	80.5786	-0.013915	0.895	0.882	1	25.4902	79.7154	97.8421	91.7905	7.307e+07	73.07	66.615	9.49963	0.851	1.08858	-0.103575	2.62638e+09	9.41936	0.1634	98.1682	1.99197	19537.4	1.95374	0.290867	0.466667	-0.330993	0.766
Suriname	2007	65	4	5.14076	100	273507	0.606728	81.2158	-0.0173228	0.893	0.882	1	25.4902	80.9272	97.9046	92.2252	1.5485e+08	154.85	66.547	14.11	0.851	1.13996	-0.0121439	2.93661e+09	9.46785	0.2467	101.377	2.00594	18059.7	1.80597	0.256711	0.448718	-0.348027	0.768
Suriname	2008	65	4	4.7981	100	9012578	0.639663	81.8573	0.0996381	0.894	0.882	1	25.4902	82.1379	97.9671	92.661	9.683e+07	96.83	66.479	21.06	0.851	1.16621	-0.0272661	3.53297e+09	9.54814	0.2314	109.167	2.03809	21127.3	2.11273	0.324843	0.453846	-0.343091	0.768
Suriname	2009	65	4	4.45387	99.9862	7749928	0.67305	82.5034	0.147267	0.894	0.882	1	25.4902	83.3473	98.0295	93.0981	1.5493e+08	154.93	66.412	31.36	0.851	1.17006	-0.260274	3.87541e+09	9.58832	0.0934	87.9207	1.94409	21246.1	2.12461	0.32728	0.515385	-0.287869	0.768
Suriname	2010	65	4	4.10836	99.9566	6485693	0.706901	83.1536	0.0824755	0.89	0.878	1	9.80392	84.5556	98.092	93.5362	1.0513e+08	105.13	66.344	31.59	0.8	1.16235	-0.332702	4.36837e+09	9.64032	0.2557	90.9614	1.95886	25234.6	2.52346	0.401997	0.501923	-0.299363	0.761
Suriname	2011	65	4	3.76141	99.9269	521984	0.741212	83.8081	0.119975	0.88	0.876	1	11.7647	85.7628	98.1543	93.9754	7.491e+07	74.91	66.276	32	0.8	1.14737	-0.284885	4.42228e+09	9.64565	-0.0728954	89.441	1.95154	20305.7	2.03057	0.307619	0.512821	-0.290035	0.753
Suriname	2012	65	4	3.41303	99.9267	3952321	0.775988	84.4671	0.0793255	0.88	0.876	1	11.7647	86.9687	98.2166	94.4158	4.173e+07	41.73	66.208	34.6812	0.8	1.13756	-0.340788	4980000000	9.69723	-0.172867	90.2012	1.95521	21876.1	2.18761	0.339971	0.469231	-0.328614	0.753
Suriname	2013	65	4	3.06321	99.9265	2683138	0.811229	85.1304	0.132779	0.868	0.894	1	11.7647	88.1735	98.2789	94.8573	3.059e+07	30.59	66.14	37.4	0.787	1.1288	-0.282395	5.14576e+09	9.71145	-0.187638	89.8211	1.95338	20840.5	2.08405	0.318908	0.533333	-0.273001	0.756
Suriname	2014	65	4	2.7106	99.9263	1411601	0.846841	85.8011	0.249271	0.868	0.894	1	11.7647	89.3772	98.3412	95.3014	1.333e+07	13.33	66.089	40.08	0.795	1.11029	-0.44973	5.24061e+09	9.71938	-0.164098	90.0112	1.9543	20081.7	2.00817	0.302801	0.565385	-0.247656	0.756
Suriname	2015	65	4	2.35567	99.9261	138313	0.882801	86.4789	0.249509	0.868	0.886	1	25.4902	90.5796	98.4034	95.7477	1.866e+07	18.66	66.056	42.7638	0.834	1.08108	-0.271172	5.12624e+09	9.7098	-0.266741	89.9161	1.95384	18293.6	1.82936	0.262299	0.557692	-0.253605	0.759
Suriname	2016	65	4	1.99905	99.9258	8863949	0.919099	87.163	0.152818	0.875	0.877	1	25.4902	91.7809	98.4656	96.1955	1.924e+07	19.24	66.04	45.4	0.849	1.04842	-0.335389	3.31742e+09	9.5208	-0.299987	89.9637	1.95407	18815.2	1.88152	0.274508	0.557692	-0.253605	0.765
Suriname	2017	65	4	1.64126	99.9256	75890934	0.955715	87.8531	0.119801	0.863	0.87	1	25.4902	92.981	98.5277	96.6441	2.263e+07	22.63	66.041	48.9452	0.846	1.00824	-0.205202	3.59168e+09	9.5553	-0.098203	89.9399	1.95395	21698.7	2.16987	0.336433	0.538462	-0.268845	0.756
Suriname	2018	65	4	1.28282	99.9254	63144857	0.992622	88.5487	0.0582661	0.869	0.87	1	25.4902	94.18	98.5898	97.0931	1.514e+07	15.14	66.06	55.1	0.843	0.972162	-0.240344	3.9962e+09	9.60165	-0.119191	89.9518	1.95401	21688.7	2.16887	0.336234	0.538462	-0.268845	0.751
Suriname	2019	65	4	0.924349	99.9252	5040632	1.02981	89.2491	0.0876805	0.857	0.87	1	31.3726	95.3778	98.6518	97.5418	2.54e+07	25.4	66.095	62	0.835	1.03794	-0.419929	4.01604e+09	9.6038	0.00778468	89.9458	1.95398	21629.3	2.16293	0.335043	0.538462	-0.268845	0.742
Suriname	2020	65	4	0.566297	84.5956	37682417	1.06725	89.9542	0.418844	0.865	0.872	1	29.4118	96.5744	98.7139	97.9896	2.895e+07	28.95	66.149	69.8369	0.832	1.0753	-0.460734	2.91181e+09	9.46416	-0.000348843	89.9488	1.954	20356.2	2.03562	0.308697	0.538462	-0.268845	0.754
Suriname	2021	65	4	0.565134	84.8867	3770566	1.06668	89.9622	0.348392	0.855	0.887	1	29.4118	96.5744	98.7139	97.9911	2.878e+07	28.78	66.219	71.992	0.854	0.907004	-0.418558	3.10792e+09	9.49247	0.124045	89.9473	1.95399	20285	2.0285	0.307175	0.538462	-0.268845	0.75
Suriname	2022	65	4	0.563671	85.1777	37734157	1.06597	89.9723	0.399689	0.885	0.887	1	29.4118	96.5744	98.7139	97.993	5.909e+07	59.09	66.307	75.7614	0.834	0.848957	-0.404953	3.7916e+09	9.57882	-0.0033514	89.9481	1.95399	20320.6	2.03206	0.307937	0.538462	-0.268845	0.775

## Sheet: XLSTAT_20231208_113935_1_HID3
2.64183	-1.03881	-1.77342	0.537616
2.80171	3.40223	0.0641377	1.65478
2.77777	3.61387	-0.995187	-0.597734
2.76389	-2.52576	2.03296	1.97285
2.44659	-3.19012	-1.30867	-0.569374
0.0731009	2.70761	-0.916651	1.92383
-1.39524	0.511973	0.90996	-0.134674
3.45496	-0.441106	1.64205	0.134933
		0.262959	-0.945233
		-2.1988	-0.478569
		-0.432919	-0.114538
		-0.683937	-0.128507
		-2.30376	0.72894
		4.3187	-0.584073
		2.30358	0.913095
		0.433753	1.26943
		-1.11104	-0.82429
		1.31242	1.45309
		0.0747575	-0.34665
		1.34268	-1.85964
		-0.668677	-0.110273
		2.36917	-2.37552
		1.2646	-1.57257
		-0.363564	-0.497653
		-0.664732	-1.22604
		-1.83845	-0.201933
		1.289	-0.730202
		1.58033	-0.603731
		-1.17062	-0.429824
		0.619248	1.63663
		-0.268472	-2.23513
		1.14041	3.59785
		-1.5664	0.260425
		-1.09921	-0.823654
		-0.568111	1.40452
		-1.48708	-0.367508
		-1.81555	0.478993
		0.274545	-0.209653

## Sheet: XLSTAT_20231208_113935_1_HID2
-1.77342	0.537616
0.0641377	1.65478
-0.995187	-0.597734
2.03296	1.97285
-1.30867	-0.569374
-0.916651	1.92383
0.90996	-0.134674
1.64205	0.134933
0.262959	-0.945233
-2.1988	-0.478569
-0.432919	-0.114538
-0.683937	-0.128507
-2.30376	0.72894
4.3187	-0.584073
2.30358	0.913095
0.433753	1.26943
-1.11104	-0.82429
1.31242	1.45309
0.0747575	-0.34665
1.34268	-1.85964
-0.668677	-0.110273
2.36917	-2.37552
1.2646	-1.57257
-0.363564	-0.497653
-0.664732	-1.22604
-1.83845	-0.201933
1.289	-0.730202
1.58033	-0.603731
-1.17062	-0.429824
0.619248	1.63663
-0.268472	-2.23513
1.14041	3.59785
-1.5664	0.260425
-1.09921	-0.823654
-0.568111	1.40452
-1.48708	-0.367508
-1.81555	0.478993
0.274545	-0.209653

## Sheet: XLSTAT_20231208_113935_1_HID1
1	-3.14159	-1	1.02068e-11
2	-3.129	-0.999921	-0.0125912
3	-3.11641	-0.999683	-0.0251804
4	-3.10382	-0.999287	-0.0377657
5	-3.09123	-0.998732	-0.0503449
6	-3.07863	-0.998019	-0.0629162
7	-3.06604	-0.997148	-0.0754775
8	-3.05345	-0.996118	-0.0880268
9	-3.04086	-0.994931	-0.100562
10	-3.02827	-0.993586	-0.113082
11	-3.01568	-0.992083	-0.125583
12	-3.00309	-0.990423	-0.138065
13	-2.99049	-0.988606	-0.150524
14	-2.9779	-0.986633	-0.16296
15	-2.96531	-0.984503	-0.17537
16	-2.95272	-0.982216	-0.187752
17	-2.94013	-0.979775	-0.200105
18	-2.92754	-0.977177	-0.212425
19	-2.91494	-0.974425	-0.224712
20	-2.90235	-0.971518	-0.236964
21	-2.88976	-0.968458	-0.249178
22	-2.87717	-0.965244	-0.261352
23	-2.86458	-0.961876	-0.273485
24	-2.85199	-0.958357	-0.285574
25	-2.8394	-0.954685	-0.297619
26	-2.8268	-0.950862	-0.309616
27	-2.81421	-0.946888	-0.321564
28	-2.80162	-0.942764	-0.333461
29	-2.78903	-0.938491	-0.345305
30	-2.77644	-0.934068	-0.357094
31	-2.76385	-0.929498	-0.368827
32	-2.75125	-0.92478	-0.380501
33	-2.73866	-0.919916	-0.392115
34	-2.72607	-0.914906	-0.403667
35	-2.71348	-0.909751	-0.415155
36	-2.70089	-0.904451	-0.426577
37	-2.6883	-0.899009	-0.437931
38	-2.67571	-0.893423	-0.449216
39	-2.66311	-0.887696	-0.46043
40	-2.65052	-0.881829	-0.47157
41	-2.63793	-0.875821	-0.482636
42	-2.62534	-0.869675	-0.493626
43	-2.61275	-0.86339	-0.504537
44	-2.60016	-0.856969	-0.515368
45	-2.58756	-0.850412	-0.526117
46	-2.57497	-0.84372	-0.536783
47	-2.56238	-0.836895	-0.547364
48	-2.54979	-0.829936	-0.557858
49	-2.5372	-0.822846	-0.568264
50	-2.52461	-0.815626	-0.57858
51	-2.51201	-0.808276	-0.588803
52	-2.49942	-0.800798	-0.598934
53	-2.48683	-0.793194	-0.60897
54	-2.47424	-0.785463	-0.618909
55	-2.46165	-0.777608	-0.628749
56	-2.44906	-0.76963	-0.638491
57	-2.43647	-0.761529	-0.648131
58	-2.42387	-0.753308	-0.657668
59	-2.41128	-0.744968	-0.667101
60	-2.39869	-0.736509	-0.676428
61	-2.3861	-0.727933	-0.685648
62	-2.37351	-0.719243	-0.694759
63	-2.36092	-0.710438	-0.70376
64	-2.34832	-0.70152	-0.71265
65	-2.33573	-0.692491	-0.721426
66	-2.32314	-0.683353	-0.730088
67	-2.31055	-0.674106	-0.738635
68	-2.29796	-0.664752	-0.747064
69	-2.28537	-0.655293	-0.755375
70	-2.27278	-0.64573	-0.763566
71	-2.26018	-0.636065	-0.771636
72	-2.24759	-0.626298	-0.779583
73	-2.235	-0.616433	-0.787407
74	-2.22241	-0.60647	-0.795107
75	-2.20982	-0.59641	-0.80268
76	-2.19723	-0.586256	-0.810126
77	-2.18463	-0.576009	-0.817443
78	-2.17204	-0.565671	-0.824631
79	-2.15945	-0.555243	-0.831688
80	-2.14686	-0.544727	-0.838613
81	-2.13427	-0.534125	-0.845406
82	-2.12168	-0.523438	-0.852064
83	-2.10909	-0.512668	-0.858587
84	-2.09649	-0.501816	-0.864974
85	-2.0839	-0.490885	-0.871224
86	-2.07131	-0.479877	-0.877336
87	-2.05872	-0.468792	-0.883309
88	-2.04613	-0.457633	-0.889141
89	-2.03354	-0.446401	-0.894833
90	-2.02094	-0.435099	-0.900383
91	-2.00835	-0.423727	-0.90579
92	-1.99576	-0.412289	-0.911053
93	-1.98317	-0.400785	-0.916172
94	-1.97058	-0.389217	-0.921146
95	-1.95799	-0.377588	-0.925974
96	-1.9454	-0.365899	-0.930655
97	-1.9328	-0.354152	-0.935188
98	-1.92021	-0.342349	-0.939573
99	-1.90762	-0.330491	-0.943809
100	-1.89503	-0.318581	-0.947896
101	-1.88244	-0.306621	-0.951832
102	-1.86985	-0.294612	-0.955617
103	-1.85725	-0.282556	-0.959251
104	-1.84466	-0.270456	-0.962732
105	-1.83207	-0.258312	-0.966061
106	-1.81948	-0.246128	-0.969237
107	-1.80689	-0.233904	-0.97226
108	-1.7943	-0.221644	-0.975128
109	-1.7817	-0.209348	-0.977841
110	-1.76911	-0.19702	-0.9804
111	-1.75652	-0.18466	-0.982803
112	-1.74393	-0.17227	-0.98505
113	-1.73134	-0.159854	-0.987141
114	-1.71875	-0.147412	-0.989075
115	-1.70616	-0.134946	-0.990853
116	-1.69356	-0.122459	-0.992474
117	-1.68097	-0.109953	-0.993937
118	-1.66838	-0.0974297	-0.995242
119	-1.65579	-0.0848907	-0.99639
120	-1.6432	-0.0723382	-0.99738
121	-1.63061	-0.0597742	-0.998212
122	-1.61801	-0.0472008	-0.998885
123	-1.60542	-0.0346199	-0.999401
124	-1.59283	-0.0220334	-0.999757
125	-1.58024	-0.00944353	-0.999955
126	-1.56765	0.00314788	-0.999995
127	-1.55506	0.0157388	-0.999876
128	-1.54247	0.0283272	-0.999599
129	-1.52987	0.0409111	-0.999163
130	-1.51728	0.0534886	-0.998568
131	-1.50469	0.0660575	-0.997816
132	-1.4921	0.078616	-0.996905
133	-1.47951	0.091162	-0.995836
134	-1.46692	0.103694	-0.994609
135	-1.45432	0.116209	-0.993225
136	-1.44173	0.128705	-0.991683
137	-1.42914	0.141182	-0.989984
138	-1.41655	0.153636	-0.988128
139	-1.40396	0.166065	-0.986115
140	-1.39137	0.178468	-0.983946
141	-1.37878	0.190843	-0.981621
142	-1.36618	0.203188	-0.97914
143	-1.35359	0.2155	-0.976504
144	-1.341	0.227779	-0.973713
145	-1.32841	0.240021	-0.970768
146	-1.31582	0.252225	-0.967669
147	-1.30323	0.264389	-0.964416
148	-1.29063	0.276511	-0.961011
149	-1.27804	0.28859	-0.957453
150	-1.26545	0.300622	-0.953743
151	-1.25286	0.312607	-0.949882
152	-1.24027	0.324543	-0.945871
153	-1.22768	0.336427	-0.94171
154	-1.21508	0.348257	-0.937399
155	-1.20249	0.360033	-0.93294
156	-1.1899	0.371751	-0.928332
157	-1.17731	0.38341	-0.923578
158	-1.16472	0.395009	-0.918677
159	-1.15213	0.406545	-0.913631
160	-1.13954	0.418016	-0.908439
161	-1.12694	0.429422	-0.903104
162	-1.11435	0.440759	-0.897626
163	-1.10176	0.452026	-0.892005
164	-1.08917	0.463222	-0.886242
165	-1.07658	0.474344	-0.88034
166	-1.06399	0.485391	-0.874297
167	-1.05139	0.496361	-0.868116
168	-1.0388	0.507252	-0.861798
169	-1.02621	0.518063	-0.855343
170	-1.01362	0.528792	-0.848752
171	-1.00103	0.539437	-0.842026
172	-0.988437	0.549996	-0.835167
173	-0.975845	0.560468	-0.828176
174	-0.963254	0.570851	-0.821053
175	-0.950662	0.581144	-0.813801
176	-0.938071	0.591345	-0.806419
177	-0.925479	0.601452	-0.798909
178	-0.912888	0.611463	-0.791273
179	-0.900296	0.621378	-0.783511
180	-0.887705	0.631194	-0.775625
181	-0.875113	0.64091	-0.767616
182	-0.862521	0.650525	-0.759485
183	-0.84993	0.660036	-0.751234
184	-0.837338	0.669442	-0.742864
185	-0.824747	0.678743	-0.734376
186	-0.812155	0.687936	-0.725772
187	-0.799564	0.69702	-0.717052
188	-0.786972	0.705993	-0.708219
189	-0.774381	0.714854	-0.699273
190	-0.761789	0.723602	-0.690217
191	-0.749197	0.732236	-0.681051
192	-0.736606	0.740753	-0.671778
193	-0.724014	0.749153	-0.662397
194	-0.711423	0.757434	-0.652912
195	-0.698831	0.765595	-0.643323
196	-0.68624	0.773634	-0.633633
197	-0.673648	0.781551	-0.623841
198	-0.661057	0.789344	-0.613951
199	-0.648465	0.797012	-0.603964
200	-0.635873	0.804553	-0.59388
201	-0.623282	0.811967	-0.583703
[truncated: 299 more rows]

## Sheet: XLSTAT_20231208_113935_1_HID
0.550486	-0.179705
[truncated: 7 more rows]

## Sheet: XLSTAT_20231207_145648_1_HID
17.2012	8.67432	1	0	1.875	8.67432	1	2
[truncated: 303 more rows]

[truncated: 4 more sheets: XLSTAT_20231207_142357_1_HID3, XLSTAT_20231207_142357_1_HID2, XLSTAT_20231207_142357_1_HID1, XLSTAT_20231207_142357_1_HID]
