# Supplementary material for: Does women's political empowerment promote access to drinking water in developing countries? Effects and transmission channels
Source: Research Square preprint supplement (doi:10.21203/rs.3.rs-8279784/v1), 2026-01-27
Supplement: Supplementary file 1 [file fda331296a4f22879303b4db.pdf]

**Table A1. Variable Definitions, Sources, and Transformations**

| Variable                                    | Description                                                   | Data source                              | Transformation / Coding  |
|---------------------------------------------|---------------------------------------------------------------|------------------------------------------|--------------------------|
| At least basic drinking water               | Population using at least basic drinking water services (%)   | WHO/UNICEF JMP                           | None                     |
| v2_gender                                   | Women's political empowerment index                           | V-Dem                                    | None                     |
| Individuals using the Internet              | Individuals using the Internet (% of population)              | World Development Indicators (WDI)       | Moving average smoothing |
| Improved drinking water                     | Population using improved drinking water sources (%)          | WHO/UNICEF JMP                           | Moving average smoothing |
| Sanitation                                  | Population using improved sanitation facilities (%)           | WHO/UNICEF JMP                           | Moving average smoothing |
| Political stability and absence of violence | Political stability and absence of violence/terrorism index   | World Development Indicators (WDI)       | None                     |
| v2x_genc1                                   | Women's civil liberties index                                 | V-Dem                                    | None                     |
| v2x_gencs                                   | Women's civil society participation index                     | V-Dem                                    | None                     |
| v2x_genpp                                   | Women's political participation index                         | V-Dem                                    | None                     |
| Women in parliament                         | Proportion of seats held by women in national parliaments (%) | Inter-Parliamentary Union via WDI (2025) | None                     |
| Rural population                            | Rural population (%)                                          | WHO/UNICEF                               | None                     |

|                                 |                                                   |                                         |                                                |
|---------------------------------|---------------------------------------------------|-----------------------------------------|------------------------------------------------|
|                                 | of total population)                              |                                         |                                                |
| Official development assistance | Official development assistance (constant USD)    | World Development Indicators (WDI)      | Values divided by 1,000,000                    |
| Urbanisation rate               | Urban population (% of total population)          | World Development Indicators (WDI)      | None                                           |
| Population growth               | Annual population growth (%)                      | World Development Indicators (WDI)      | None                                           |
| Control of corruption           | Control of corruption                             | World Development Indicators (WDI)      | None                                           |
| GDP per capita                  | GDP per capita (constant USD)                     | World Development Indicators (WDI)      | Natural logarithm                              |
| Foreign direct investment       | Foreign direct investment, net inflows (% of GDP) | World Development Indicators (WDI)      | Moving average smoothing                       |
| International trade             | Trade (% of GDP)                                  | World Development Indicators (WDI)      | Natural logarithm and moving average smoothing |
| Energy consumption per capita   | Electric power consumption (kWh per capita)       | World Development Indicators (WDI)      | Divided by 10,000 then natural logarithm       |
| Agriculture                     | Agriculture value added                           | World Development Indicators (WDI)      | Natural logarithm                              |
| Democracy index                 | Democracy Index                                   | Economist Intelligence Unit (2006–2024) | None                                           |
